# Supplementary material for: Identifying Quantitative Trait Loci (QTLs) and Developing Diagnostic Markers Linked to Orange Rust Resistance in Sugarcane (Saccharum spp.)
Source: Front Plant Sci. 2018 Mar 19;9:350. doi: 10.3389/fpls.2018.00350 (PMC5868124; doi:10.3389/fpls.2018.00350)
Supplement: Supplementary file 1 [file Data_Sheet_1.XLSX]

## Sheet: table S1
Table S1. 165 sugarcane clones derived from multiple crosses in multiple years.
Sugarcane Clones	Crossing year	Female	Male
CP00-1074	1998	CP89-2143	98P07
CP00-1101	1998	CP89-2143	CP89-2143
CP00-1237	1998	CP94-1200	CP92-1167
CP00-1630	1997	CP81-1238	CP90-1535
CP00-1813	1997	CP89-2377	CP84-1198
CP00-1830	1997	CP72-2086	CP90-1535
CP00-2164	1997	US95-1063	US95-1127
CP00-2180	1997	HoCP91-552	HoCP91-552
CP01-1181	1993	CP84-1198	CP82-1172
CP01-1205	1999	CP94-2095	CP89-2143
CP01-1317	N/A	N/A	N/A
CP01-1338	1998	CP94-1200	CP89-2143
CP01-1372	1998	CP94-1200	CP89-2143
CP01-1391	1998	CP81-1384	CP94-1528
CP01-1564	1998	CP93-1634	CP89-2143
CP01-1957	1998	CP88-1762	CP88-1762
CP01-2203	1996	CP89-0831	LCP85-384
CP01-2365	1999	CP94-2045	CP95-1569
CP02-1143	1998	CP93-1382	CP92-1666
CP02-1157	1998	CP92-1561	CP84-1322
CP02-1158	1998	CP92-1561	CP84-1322
CP02-1458	1998	CP85-1382	CP80-1743
CP02-1736	1998	CP80-1743	CP93-1439
CP02-1769	1998	CP89-1509	98P07
CP02-1800	1998	CP94-1528	CP80-1743
CP02-1985	1998	CP90-1436	CP88-1762
CP02-1987	1998	CP92-1167	CP94-1447
CP02-1994	1998	CP75-1632	CP80-1743
CP02-2103	1999	CP94-1200	CP94-1100
CP02-2281	1998	CP94-1200	CP92-1167
CP02-2424	N/A	N/A	N/A
CP02-2454	1999	CP84-1198	CP94-2203
CP02-2525	1998	CP94-1100	CP94-2059
CP03-1094	2000	CP95-1569	CP96-1310
CP03-1173	2000	HoCP85-845	HoCP85-845
CP03-1632	1998	CP84-1198	CP88-1762
CP03-1463	1999	CP84-1198	CP89-2143
CP03-1491	1998	CP92-1561	CP92-1167
CP03-1912	2000	CP92-1167	CP95-1039
CP03-1939	2000	CP82-1172	CP95-1039
CP04-1321	2001	CP98-1462	CP98-1119
CP04-1367	2001	CP97-2068	CP94-1607
CP04-1426	2001	CP95-1712	CP84-1198
CP04-1566	2001	CP89-2377	CP96-1252
CP04-1619	2001	CP95-1569	CP84-1198
CP04-1844	2001	CP97-1989	CP84-1198
CP04-1935	1998	CP94-2059	CP84-1322
CP04-2203	1997	US97-1034	US95-1071
CP05-1364	2002	CP93-1634	CP98-1417
CP05-1451	2002	CP84-1198	CP88-1762
CP05-1488	2002	CP98-1417	CP89-2376
CP05-1507	2002	CP93-1309	02P22
CP05-1526	2002	CP98-1029	CP88-1162
CP05-1616	2002	US90-0018	CP88-1762
CP05-1678	2003	US99-1055	US02-1339
CP05-1685	2003	US99-1001	US02-1432
CP05-1740	2003	US99-1055	US02-1027
CP06-2042	2001	CP96-1252	01P04
CP06-2400	2003	CP94-1100	03P29
CP06-2425	2003	CP01-1625	03P29
CP06-2495	2003	unknown	unknown
CP06-2818	2003	US90-20	US90-20
CP06-3103	2003	unknown	unknown
CP07-2137	2005	CP01-2390	CP84-1198
CP09-1385	2006	unknown	unknown
CP09-1430	2006	CPCL00-6756	CP01-2390
CP09-2392	2007	CP01-2390	POLY 07-04
CP09-4153	N/A	N/A	N/A
CP09-4758	N/A	N/A	N/A
CP27-0033	N/A	N/A	N/A
CP27-0035	N/A	N/A	N/A
CP31-0294	N/A	Co281	US1694
CP31-0511	N/A	POJ2364	Co0290
CP34-0079	N/A	N/A	N/A
CP36-0011	N/A	N/A	N/A
CP36-0211	N/A	N/A	N/A
CP47-0193	N/A	CP34-0120	CP36-0211
CP52-0068	N/A	CP29-0320	CP38-0034
CP53-0017	N/A	F36-819	CP48-0126
CP53-0018	N/A	N/A	N/A
CP56-0059	N/A	CL47-0083	CP34-0079
CP56-0063	N/A	CL47-0083	CP36-0105
CP57-0603	N/A	CL47-0143	UNKNOWN
CP69-1052	N/A	N/A	N/A
CP61-0037	N/A	N/A	N/A
CP62-0374	N/A	CP53-0018	CP33-0224
CP65-0059	N/A	N/A	N/A
CP70-1527	N/A	CP62-0374	CP57-0526
CP71-1086	N/A	CP52-0068	CP56-0059
CP72-1312	N/A	N/A	N/A
CP72-1370	N/A	CP65-0357	CP56-0063
CP72-2086	N/A	CP62-0374	CP63-0588
CP73-1547	N/A	CP66-1043	CP56-0063
CP73-1549	N/A	N/A	N/A
CP75-1091	N/A	CP68-1067	CP70-1133
CP75-1553	N/A	CP68-1026	73P02
CP75-1632	N/A	CP68-1067	CP70-1133
CP77-0413	N/A	N/A	N/A
CP78-0348	N/A	N/A	N/A
CP78-1628	N/A	CP65-0357	CP68-1026
CP79-1553	N/A	N/A	N/A
CP79-1697	N/A	N/A	N/A
CP80-1743	N/A	CP72-2083	CP68-1067
CP80-1752	N/A	N/A	N/A
CP80-1827	N/A	CP70-1133	CP73-1311
CP81-1254	N/A	CP72-1210	78P08
CP81-1384	N/A	CP68-1067	CP74-2013
CP84-1198	N/A	CP70-1133	CP72-2086
CP85-0830	N/A	CP74-0387	CP77-0407
CP85-1491	N/A	CP75-1553	CP72-2086
CP88-1762	N/A	CP80-1743	85P06
CP89-1509	N/A	CP80-1827	86P19
CP89-2143	N/A	CP81-1254	CP72-2086
CP89-2376	N/A	Unknown	Unknown
CP92-1167	1989	CP84-1591	SP70-1143
CP92-1213	1989	CL73-0239	CP85-1498
CP92-1435	1989	CP70-1133	CP72-2086
CP92-1641	1988	CP80-1827	CP84-1322
CP92-1666	1988	CP82-1592	CP84-1322
CP94-1200	1991	CP83-1969	CP80-1743
CP94-1591	1991	CP87-1733	CP85-1491
CP94-2203	1992	US90-1072	CP80-1827
CP95-1913	1990	US90-1011	CP72-2086
CP96-1252	1994	CP90-1533	CP84-1198
CP96-1290	1994	TCP90-4094	TCP90-4121
CP96-1350	1993	CP89-1717	CP85-1432
CP96-1602	1994	CP81-1425	94P03
CP96-1865	2000	GreenGerman	CP70-1133
CP97-1944	1994	CP80-1743	94P15
CP98-1029	1996	CP91-1980	CP94-1952
CP98-1112	1995	CL61-0620	US87-1006
CP98-1335	1995	TCP87-3388	CP70-1133
CP99-1534	1995	CP89-2377	CP89-1756
CP99-1540	1995	CP90-1535	95P16
CP99-1541	1995	CP90-1535	95P16
CP99-1542	1995	CP90-1535	95P16
CP99-1686	1994	CP85-1382	CP70-1133
CP99-1865	1994	CP91-1795	CP90-1151
CP99-1894	1993	CP87-1475	CP72-1210
CP99-2084	1197	CP93-1634	CP84-1198
CPCL00-4111	1998	CL83-3431	CL89-5189
CPCL00-6131	N/A	N/A	N/A
CPCL02-0926	2001	N/A	N/A
CPCL02-1295	2001	CP88-1762	CL91-1637
CPCL02-6848	2001	CL92-2533	POLY01-9
CPCL02-7406	2001	CP88-1762	POLY01-9
CPCL02-8001	2000	Unknown	Unknown
CPCL02-8004	N/A	N/A	N/A
CPCL02-8007	N/A	N/A	N/A
CPCL02-8070	N/A	N/A	N/A
CPCL05-1102	2000	CL89-5189	CL88-4730
CPCL05-1201	2002	CL87-2882	CL93-2679
CPCL05-1791	2002	CP96-1252	CL90-4725
CPCL95-1907	N/A	N/A	N/A
CPCL95-2287	N/A	N/A	N/A
CPCL95-2406	N/A	N/A	N/A
CPCL96-0860	N/A	N/A	N/A
CPCL97-2730	1995	CL75-0853	CL88-4730
CPCL97-4983	N/A	N/A	N/A
CPCL99-1225	N/A	N/A	N/A
CPCL99-2206	N/A	N/A	N/A
CPCL99-4295	N/A	N/A	N/A
CPCL99-4455	1997	CL90-4643	CP84-1198
CP95-1039	1992	CP81-1238	CP84-1198
CP88-1762	N/A	CP80-1743	85P06

## Sheet: table S2
Table S2. Positions in the sorghum genome and primer sequence of the 96 sugarcane simple sequence repeats and 61 gene-derived primers (Chr = chromosome) for orange rust disease resistance marker development.
Primer	Chr.	Forward sequence (5’-3’)	Reverse sequence (5’-3’)	Note
G1	2	ACCATGGAAATCCATACGTC	GGCCAACACTTAGGCCAATA	Sobic.002G166150
G10	2	AATGCTGTCGCTCTGAATGA	ATTCCAGCTGCCAACAATTT	Sobic.005G150700
G11	2	AAAGCACGAGAGGTTCAGGA	TCTCTTGCTTCTTTGGGTAGC	Sobic.005G154100
G12	2	TTTCCTTCAACTCAGCAATCC	TACGGCATGGAAGGCACTTG	Sobic.002G161900
G13	2	GCTCTACCATGAGAGCACCTG	TCTAGCTGCAATTGGATTCG	Sobic.002G169400
G14	2	GCACATAGTGCGGTGATGTTA	ATGCCGGACCTTTCCATGGA	Sobic.002G195800
G16	2	GGTCACTCTCGTGTCCATA	AGCTTGCTCTGCTTCTTGGA	Sobic.005G154400
G2	2	CACCAGCAAGTTGTTCCAAG	TGGCTCAGCTGAACTCTTGA	Sobic.002G168500
G3	2	GCTCTACCATGAGAGCACCTG	TCTAGCTGCAATTGGATTCG	Sobic.002G169200
G4	2	GGCTTCAGATCTCTGGTCACA	GACGGTGCAGAACTGAGTAGTT	Sobic.002G169633
G5	2	AGGTCACACTTGTCCCAACC	TCATCACCCTTGACAACTAA	Sobic.002G196800
G6	2	TTAGCATGCCAGATCCACAA	TGTCACTTTCTGATCCGGGAGA	Sobic.002G205900
G7	2	CTCCAGGTCAATGAGAGTTCTAA	GGAAATTGTGGAAGGTGTAA	Sobic.002G168100
G8	2	GTCAACATCTGCAGCGACAT	CTGTACACGTCGCCCTTTGT	Sobic.002G203000
G9	2	GAGACAGGCCTTTGGACCTT	CAGAGCGACAGCATTGAGAG	Sobic.002G203100
M1	2	CCAGCTTCAAGTTTGCATTG	CCTTGCCGATCATCCATC	Sobic.002G161900
M2	2	GCATGTCTGTGGAAGCAACA	CCTTTTCGCGGTAGAAGACA	Sobic.002G168100
M3	2	GGCTACGTGAACTGCAGCAT	GCAACAACCATCATCCCATA	Sobic.002G168100
M4	2	CACCCAACGAAGAGATAGCTG	GTCATCTTGCAGGCCTAGGTA	Sobic.002G168100
M5	2	AGTGAGCCTTTTTCGCTTGA	GTGAATGGAGAGGCCCAAC	Sobic.002G168100
M6	2	TCAATGCTGTCGCTTTGAAT	CACACACCCAATACCAGTGC	Sobic.002G168100
M7	2	ACTGGAGAGGCTGTCCTCAA	CAGCTGCCAACAATTTGATCT	Sobic.002G168100
M8	2	TTCATCAGCCAAGCATTGAG	GAGTTGACCCCCTCTTTTCA	Sobic.002G168100
M9	2	ACTGGGCCCACTGTCTAGC	TCCATGGCTTGTGAACTGAT	Sobic.002G168100
M10	2	CCGGAGCAGATTAGGGGTAT	TTATCCTGCTGCTTGTGCTG	Sobic.002G168500
M11	2	ACACCAGCAAGTTGTTCCAA	GTGACCTGATCCCTGGAAAG	Sobic.002G168500
M12	2	CTGCACTGCTTGGAGACACT	TTGGCAACTGCAACACTCTT	Sobic.002G168500
M13	2	CCAGGGTATGTGTGCAACTG	AAGGATGCATGAATTGCTTTG	Sobic.002G169200
M14	2	ATGCATCCTTGATACCGTCA	TGAGAGCAAGAAAACCCATTG	Sobic.002G169200
M15	2	TTGTCGAGCAGGAAGGAAAT	TGTTGGCGAAAATACTCCTG	Sobic.002G169200
M16	5	GCGGGTTATACTGAGGATCAAG	GACGGCCTCCAATTTCCAAC	Sobic.005G154400
M17	5	AGCAGCAAGGTTTGCTGGTC	TCTGCTCCAGTTGGCCAATG	Sobic.005G154100
M18	5	AAGGGAGGAGGGGGAAAAG	CCCGCGATCAAGATCTAAAG	Sobic.005G154100
M19	5	TGAGGATCAAGAGTGAGGAAAA	GTCCCCTGTCGTTTCTTTGA	Sobic.005G154400
M20	5	GAGGTGGAAGCCTGACGC	ACATTTGCCACAATGCTGA	Sobic.005G155100
M21	5	CCGGCTGGTGAAGCTCAATC	GGAAATCGCATACACTGCCA	Sobic.005G155100
M22	2	GCTCTACCATGAGAGCACCTG	TTCTAGCTGCAATTGGATTCG	Sobic.002G169400
M23	2	GCTCCGAAGAGCTCTACCAT	TTCTAGCTGCAATTGGATTCG	Sobic.002G169400
M24	2	TGTAGCTGATGAACCAGAGGAA	GTGAGGCACAATGTCTTCCA	Sobic.002G169400
M25	2	AGCCATCCAGAGTTTGCATT	CATTTGTTTCCAGCGAGGA	Sobic.002G169400
M26	2	CTGCAAACAGCCACACATAA	TCATGCACAATGCCAGAAAT	Sobic.002G169633
M27	2	TGTAAGCAATGCACTGCAAG	AGTTTAATCCTGAGTTTTTCAAGC	Sobic.002G196800
M28	2	TGCAAACTCGTTCAGGATGA	TATGACTTGCCTCCCGATTC	Sobic.002G196800
M29	2	ATTGGATCGGGAGCTAATGG	CCGGGTCTTACCCAAAATCT	Sobic.002G196800
M30	2	GCACCACCAAGCCATTTTAT	ATGCATGGATTCTGCATTACC	Sobic.002G196800
M31	2	GCTCCAAGTCCAGCAAGTATG	TATTTTGGGCCTCACATTCC	Sobic.002G196800
M32	2	ATGTGAGGCCCAAAATATGC	TGGCATGCTAAGACAACACC	Sobic.002G196800
M33	2	TTGGTTGTCAAGGGTGATGA	AGAACTCTCGTTGACCTGGA	Sobic.002G196800
M34	2	AAAAGTCCAACCGTGAGCAG	ACCACTAGCACAAGGAGTGC	Sobic.002G196800
M35	2	GATTGATGCTTTCGGAGGAC	GACCACTAGCACAAGGAGTGC	Sobic.002G196800
M36	2	GTCAACATCTGCAGCGACAT	CTGTACACGTCGCCCTTTG	Sobic.002G205900
M37	2	GTACCTGCACCACCACTCG	TTCCTCCTCGTCACCATTTC	Sobic.002G205900
M38	8	ACCTGTGGTGGCTTGCTAA	GGACATCTCCATGGCGTACT	Sb08g023120
M39	8	ATCAATGGCACCGTCGTC	TGACCTGGTACGTCATGGTG	Sb08g023120
M40	8	CTGGGTCTACCCCTTCAAGA	GGTTGCCCAGGTCGTTGTA	Sb08g023120
M41	8	CCACTTCGAGTGCAACTCCT	CTCCTCCTTGTCCGGGTTG	Sb08g023120
M42	8	AGCAGGTCTCCAAGATGGTC	GGTAATGGAGCTCTGCTTGC	Sb08g023120
M43	8	TCATGGACAAGCTCAAGACG	GGTAATGGAGCTCTGCTTGC	Sb08g023120
M44	8	GCAAGCAGAGCTCCATTACC	GTCGTCCTTGAGGAAGAGCA	Sb08g023120
M45	8	AGGCAAGCAGAGCTCCATTA	GGCAGGCTGAGCTCTATGAC	Sb08g023120
M46	8	TGGCTTGCTAAGGCTCATGT	ACATGGTCCTCTCCAGGATG	Sb08g023120
SCESSR2379	2	GTGGCCAGCAGAGGAGTGTC	AAGCTGCACCCTTTCCACTG	Sugarcane SSR
MOLSSR2697	2	GATAGCCCCTGCTCTCTAGCAAAT	TCAAATCAAGATGTGCATGTGTGT	Sugarcane SSR
SCESSR1334	2	ACCAACCCAGCCTCGTCAT	TCGTAGAAGCGGTAGGCGG	Sugarcane SSR
SCESSR0865	2	TGGAGGAAGTACGGCCAGAA	TTCGATTCCACTTGGGAGGA	Sugarcane SSR
LAPSSR0389	2	CTTCTTGCCGATCTCGGTGTAG	CAATCATCCTTCCCCAACTTCC	Sugarcane SSR
SCESSR1977	2	CTTCCCCAACTTCCCTCCC	CTTCTTGCCGATCTCGGTGT	Sugarcane SSR
SCESSR0004	2	GTTTGGTTCCCGGAGGAGAG	ACAATGGACACCTGAACGGC	Sugarcane SSR
SCESSR0390	2	ACAATGGACACCTGAACGGC	GAGGAGAGAACCACAGCCGA	Sugarcane SSR
SCESSR0811	2	ACAATGGACACCTGAACGGC	TCCCGGAGGAGATAACCACA	Sugarcane SSR
SCESSR1311	2	ACAATGGACACCTGAACGGC	GTTTGGTTCCCGGAGGAGAG	Sugarcane SSR
SCESSR0939	2	CATTGCCCTCTCAAGCAACC	TTTGCATCAGTCAGCCTGGA	Sugarcane SSR
MOLSSR1734	2	AAGGAAGTGGGGTCGAGCAT	TCCTCAGGAACAACTACCTCCTCC	Sugarcane SSR
SCESSR1141	2	GTTCGGCTTCGGTTTCGAC	GCCTTGGCGTCCATCATCT	Sugarcane SSR
SCESSR0450	2	GCCGCAGTCCGCTTAAACTA	GGCATGCTTTCTTGGGGTTA	Sugarcane SSR
SCESSR2495	2	TCTCCTCCGTCTGGATCTGG	CTTCTTGCCCTTGCTCCTCC	Sugarcane SSR
SCESSR1547	2	CAAACCCACGGTGCTTTCAG	GGAGAGCAGGAAGGTGACGA	Sugarcane SSR
SCESSR1659	2	CATTGGGATCGGTACTGGGA	GAGGCAGAGCCTGATCCAGA	Sugarcane SSR
SCESSR2108	2	GCACTCGCTTCCATTTCCAC	GGAGGAGGTCAGCTTGGCTT	Sugarcane SSR
SCESSR0784	2	AAAATATTGCCAGTCCCGCC	GAAGACGGTGGACTCGAGGA	Sugarcane SSR
MOLSSR2883	2	TGAGGTGTTGCCGTTTAATAGAGG	ACGCGACATTCTTGAAGCTCAG	Sugarcane SSR
SCESSR2129	2	GCCAAGGACAAGGAGACGAG	CGTGGAACAGCTTGTAGGGC	Sugarcane SSR
SCESSR0731	2	ATGATGGTTACGGCGTGGTC	CCAGCTTGTTCTCCACCTCG	Sugarcane SSR
SCESSR1519	2	ATGATGGTTACGGCGTGGTC	CCAGCTTGTTCTCCACCTCG	Sugarcane SSR
SCESSR0962	2	GAACCATCCTGCATTCAGCC	CTTGGTTTGGAGCATCAGGC	Sugarcane SSR
LAPSSR1072	2	GAACGTGTTTGATTTTTAATCGCC	TGACAGATACATACACCCAACCCA	Sugarcane SSR
MOLSSR2513	2	TGACAGATACATACACCCAACCCA	GAGGAAAAGAGGTGGACGAAGAAT	Sugarcane SSR
SCESSR0503	2	GCAGTCGAAAGTGAAACGGC	AGTTCGACTCCCTGCACGAC	Sugarcane SSR
MOLSSR1795	2	ACCTCTGTTCCATTTTATCTGGCA	GCAAGTTAGAATGACACGGTCTCC	Sugarcane SSR
SCESSR1685	2	CCAGAACCTGTCCAAGACGG	TAGCACATGCACCAACGAGG	Sugarcane SSR
SCESSR1686	2	CCAGAACCTGTCCAAGACGG	ACTAGCACGTGCACCAACGA	Sugarcane SSR
SCESSR0164	2	ATCGCCTCGACGTCTACCAA	CTCTCCGAAGGGCACGTCT	Sugarcane SSR
SCESSR0896	2	AGGAGGAGGAGAAGCGATGG	ACATCTCGACGACGAACACG	Sugarcane SSR
SCESSR1508	2	ATCGCCTCGACGTCTACCAA	CAGCTCTCCAACGGGCAC	Sugarcane SSR
MOLSSR1707	2	GTGATCCCTTCCCAACGCTAC	CACATCTCTCCTCGTCCAAAGACT	Sugarcane SSR
SCESSR0281	2	CATCCGCTTCTTCGATGACC	CTGGTGCACGCAGTCCTTCT	Sugarcane SSR
SCESSR0444	2	GTGCAGGTCCAGGTCAGAGC	TTCTCGGTGGTCACCAGCTT	Sugarcane SSR
SCESSR1157	2	GGAATCGTTCGAAGCCAACA	AGTCGCCGAACACCAGGAT	Sugarcane SSR
SCESSR0451	2	GACGTCCACCACCGGTACTC	GTCGTTGCCGTCGCCTAA	Sugarcane SSR
mSSCIR37	2	ATTCTGTCTGTCGTTCTCC	ACTTTCTTGGTTCTTCATA	Sugarcane SSR
SCESSR1158	2	TCCCTCTGTCTGCGACGACT	AAACCCTCCAGCAATGTCCA	Sugarcane SSR
MOLSSR2244	2	AAATTTCTTGTTCTCCTTCCCGTC	CTCTACGCTGCTCAGCTCAACTC	Sugarcane SSR
SCESSR0300	2	TGATCAGTCACCTTGCCTGC	GCATCAGAACCATGGATGGAA	Sugarcane SSR
SCESSR0301	2	TGAGGGTTTGCCACTTGCTT	TGCTTTCCCAGCAGTGTTTG	Sugarcane SSR
SMC1752LA	2	GGCTGATTTACATGAAACTGTTCT	AAAGCTGGTATCCCAGCATACT	Sugarcane SSR
LAPSSR1106	2	AGAGGGTGTCCGTCGGGTAGT	ACCAGGTCCGTCGTCTGGTC	Sugarcane SSR
SCESSR0347	2	TTGGCTTGCGTTTTGTGAAA	AAAGGGACCAATCATGGCCT	Sugarcane SSR
SCESSR2288	2	GGGCAAAGTGTATCGGCATC	AGCAGCTAGAGAGGCCCCTAA	Sugarcane SSR
SCESSR2548	2	TGGAACCCTACAAATTGCCG	ACAGCAGCAAGAGAGGCCC	Sugarcane SSR
SCESSR0983	2	CGGTCGGTGCACATACAGAG	GATGCACCTAGCATCACCGA	Sugarcane SSR
LAPSSR1001	2	AAGGTGTAGCCATTCAAGCTCC	CTGACAGCGGACGAACTTGT	Sugarcane SSR
MOLSSR2036	2	TTAGTCGAGAAGAGAAGACGAGGC	CTTTGAGATTGGAGAAATGAGCGT	Sugarcane SSR
SCESSR2340	2	GTCAAGGACGCATTCCCATC	AAAGGGGGCTTCAAAGAGTGA	Sugarcane SSR
LAPSSR0865	2	ATGATCACAAGAGGTAACCTTGGC	AATTTGGCTGAAGATGTTGTGGTT	Sugarcane SSR
SCESSR0617	2	GCAGCACACAAAAAGAGGGG	CGATCCAACTCCACCTCCAC	Sugarcane SSR
SCESSR2115	2	GCAGCACACAAAAAGAGGGG	CGATCCAACTCCACCTCCAC	Sugarcane SSR
mSSCIR31	2	ATTTGGGTAAGGATGGAT	CCTAATGATACGCTTTGA	Sugarcane SSR
SCESSR0387	2	GACCAACACGGTGAACACGA	CAGGCACGTCACCTCCTTCT	Sugarcane SSR
SCESSR1171	2	CTGACCTGACCACCCGAGAG	GTAAACGCCGGACAGAAACG	Sugarcane SSR
SCESSR2429	2	TCAGGGTTCCTGAATTCCCA	GCTGCGCTTTTCCTCAGAGT	Sugarcane SSR
LAPSSR1296	2	GCATTGGGTTCACAAGCATAGAG	TTGCAAAGATGAACTCTTTCTGGC	Sugarcane SSR
SCESSR1108	2	TCTTAGCGGGACAGCGAGAG	GACGAAGAGCTTCCCGGAGT	Sugarcane SSR
LAPSSR0621	2	GCTGTTTAGGTTGGTTAGCCTTCA	GTAGTTGTAGGATGCGTTGGTCTG	Sugarcane SSR
MOLSSR2238	2	AAACCAAACTGTACCTATGCGAGC	GGTCAGATGCTTATTCGTCTCCTG	Sugarcane SSR
SCESSR0154	2	CTCCGAGAACGTCTGCGTGT	CGTTGAAGAGGTGGGACTCG	Sugarcane SSR
SCESSR1020	2	CTCCGAGAACGTCTGCGTGT	GGTAGGGCGCGTTAAAAAGG	Sugarcane SSR
SCESSR2042	2	GAGAACGTCTGCGTGTGTGG	CGTTGAAGAGGTGGGACTCG	Sugarcane SSR
SCESSR0656	2	AGGCGGAATCATGGCGTT	GCATCCATCCGCGTCAGA	Sugarcane SSR
SCESSR1049	2	CGCTCAAGGAGGAGGTCGTA	GAGCTGCTCCCCGAGGTACT	Sugarcane SSR
SCESSR2497	2	TCTCCTGCTCCTCGTCCTTG	ACAGCACATCATGCACAGGC	Sugarcane SSR
SCESSR1974	2	CTTACCCCACCAGTGCAAGC	TTCCGGTCGTAGTGCCTGTC	Sugarcane SSR
SCESSR1556	2	CAACTTCCTACCCACGCCAG	AACTCGGCTTCGCCTACTCC	Sugarcane SSR
LAPSSR1384	2	ATGAGGACGTGGATGAGGATGA	ATGCACCTCCACAACAGCATC	Sugarcane SSR
SCESSR0968	2	GATGGTCCTGGACTTCGTCG	GCACTGCCATTCCCAATTTC	Sugarcane SSR
SCESSR0153	2	CCCGTTCGTCTCCAGCAG	GTCGACGTGTGGGACTTCCT	Sugarcane SSR
UGSM60	2	CGACTCCACACTCCACTC	CCGAACACCACCTTCTTG	Sugarcane SSR
SCESSR0638	2	TTCATTCAAGTCCTGCTGGTCA	CTCTGTCCCCCAACCATCAC	Sugarcane SSR
LAPSSR1036	2	TATGACGCACACGGAGCATATC	TCCATCATCTAATAATTGCCATTCAA	Sugarcane SSR
MOLSSR1760	2	CTTCTTCCCAGCATCATCTGAGTT	CTCACCTATCCTCCGACGAGC	Sugarcane SSR
SCESSR2033	2	GACGCCTCCACCTCCACC	GCTACCGCTAGCACGCCC	Sugarcane SSR
MOLSSR2754	2	ACCCAATAAGCCACCAGATTATCC	TAGATAGAGCCGACCTAACGTTGC	Sugarcane SSR
SCESSR1558	2	CAAGAGGAAACTGGCGAACG	CCAACCTCTTGACCAGCACC	Sugarcane SSR
SCESSR0928	2	CCACCGCAGCCGATATGA	TTGAGAGGCTGACCCTGGAA	Sugarcane SSR
SCESSR1378	2	ACGTCCACATGTCCATCCC	GGACCACCTCGTCGGCTA	Sugarcane SSR
LAPSSR0001	2	GGTATGGATTGGACCTCTC	GGAATATGGCAATGGTCTCATG	Sugarcane SSR
SCESSR2032	2	GACCTCGAGTGGTGGTTCCAT	GTGCACCCAGTAGCACCCTC	Sugarcane SSR
MOLSSR2178	2	CGCTTTCGATTCGACTTCAACTT	GTAGGGAGGGAAGGACCTGATG	Sugarcane SSR
MOLSSR2616	2	GGTTCTTCATGGTGCCGAAG	AATCCCGAAACTACTACCACTCCC	Sugarcane SSR
SCESSR0382	5	CTTCCTGAAGGCGTCACTGG	CAGGCGTGCTAGTGTCGATG	Sugarcane SSR
SCESSR1529	5	ATGGACAAGCAGATCGAGCG	TAGGTCCGACAGCAACGACA	Sugarcane SSR
SCESSR0636	5	TCCAACTTCATCCAAGTTTCCAA	GCACCCACGAAGAGGATGAC	Sugarcane SSR
SCESSR2527	5	TGCAGCCATGAAGAGGATGA	TCCAACTTCATCCAAGTTTCCAA	Sugarcane SSR
SCESSR0700	5	GGTGAACCCTACCGCCTACC	GTTCGCCACGGCTAGTTGAC	Sugarcane SSR
SCESSR2313	5	GGTGAACCCTACCGCCTACC	GTTCGCCACGGCTAGTTGAC	Sugarcane SSR
SCESSR1457	5	AGGACAGAGATCGTCGCAGG	ATCATCAGGACGGTCACGCT	Sugarcane SSR
SCESSR2551	5	TGGACTAGGCCACCAGGAAA	GTTTCGATGTGCTGCCTCCT	Sugarcane SSR
LAPSSR0640	5	CAGGTACTACTACTGCCGGCTCAG	AGAGCTTGTTCTTGCTCTCCTTGA	Sugarcane SSR

## Sheet: table S3
Table S3. Sugarcane putative resistance genes
Sugarcane putative R genes	Homologous sorghum gene models	eference R genes1	Description	Species	Sugarcane transcript seq
Seq_100154	Sobic.009G061400	FLS2	Arabidopsis thaliana FLS2 (FLAGELLIN-SENSITIVE 2); ATP binding / kinase/ protein binding / protein serine/threonine kinase/ transmembrane receptor > (FLS2) mRNA, complete cds.	Arabidopsis thaliana	GGTTCAGTTCATTCCTCTGAAAGCAGATCGGCTTTTCCAACATATCCCAACTGGAAAGTTTGTCTCGGCAGCTGATTGCAGATTTGCAGATGCTTGTGTGTGGCTGTGTGCTACTGCATGTCTGTATGGGAAAAGGACTGGCTCATGCATGCTGACACTTTGATTTAACCTCCTCTGTTGCTTGCTGTCACAGCCAACAGGCGAGAAACGTACAAGCAAGCAATAATCACAGTGTGAAGGAGGCACAAGTCAAACCCAGATCAATCATGCTTCAGGAACCAGTACTAAATTGTTCGGACGTCAAAGAAAGTCAATCGTGGACCAATGATGCAACCATTGCACCAGCCCCAAGTCATTGTCCTCATGTCGCCGAACGGACGGCTTGGCCAACAACTCTGT…
Seq_100320	Sobic.009G217600	PEPR1	Arabidopsis thaliana PEPR1 (PEP1 RECEPTOR 1); ATP binding / kinase/ protein binding / protein serine/threonine kinase (PEPR1) mRNA, complete cds.	Arabidopsis thaliana	TTTTTTTTGGGGCAAGAACGAAATCCATTGCATTGTTTGTGTCACACAGTAATTTACATGGAGTTTCACCATCACAAGGTGAATTCACACGGAGATGCCACTCGTGATCAGATGAAGCGTCAGCTTCTCCTACATTGTGGGCGCCGTCAACGTCAATGTCGAGGGGCTCGGCGGCCTCTGTCCTCACCACTTCTTCCTCGCTTCCGGCAACGCCGTCGTCGACGCAAGGGACGTCCTCGTCCGCCGGCGCGTTCGTCGCGTCGGACGACGATGCTTCGGCTGGTGCGGAGAGCACGTCGATCCAGCCCTCGTCGGAGTCCCAGTCCGGCAGCGCCGAAGCGGGGCAGGCCAGCGTCCCGATCCTCTCGGCGGTGCTCTGTGCCAGCACCACGTCGTGGT…
Seq_100324	Sobic.009G217500	PEPR1	Arabidopsis thaliana PEPR1 (PEP1 RECEPTOR 1); ATP binding / kinase/ protein binding / protein serine/threonine kinase (PEPR1) mRNA, complete cds.	Arabidopsis thaliana	GTTCCTAAGTCTGTCAGTTGTGGGAGTCATAAAAGAAAAAGGGGGTGACAAAATTAGCAGACAGACAGAGGAGGAGGAGGAAGACGACAGGGGGCGATTTGATTTTGACCATGAAAAGTAGTTTTTGCTATTTCTTCAGCAGAAATATCAAGATGAAGTACAATCGGATCACTGGTGAAATACGCATAAACATCTAGCTGCTGCTGATGCGCATAAGCATCCGCAGCTCCTCCTACATTGTGCACAGGGTCATTCCCAACATCCAAGTCAGCGTCGAAAAGGTCAGGGTCCAGTTCAGCTTCCGATTCGTCTCCCCAGAACAATTCATAGCTCGTCGTCTCCGCTGCCGGCGCAGCCACGGGTGCCTCACGGTGCACCTGCTCCGATGATGTCGCCACC…
Seq_100470	Sobic.002G408800	xa21	Oryza sativa Indica Group Xa21 gene for receptor kinase-like protein, complete cds, cultivar:II you 8220.	Oryza sativa	CCTCACTCGCCCAAGCTTTTACTTTACTCGCCCCCACCACCACCACCTCCAACCCCGCCTTCCGCTTCCCACCCGCCCGCCTGCCTGCCTCCCCGCGCCGCCGCCTCCGGATCGCGGCCGGACCTCCCTCCTGCGCCGAAGCTTCGCGCGCCAGCCCCGGCCCATGCCCGGCCGTCGGTGACCAGCGCCCCCACGGCCGGCCATGGGCTGCGTGCACGGCCGCCCCACCACCTCCAGCCCCGCGCCCGCCGCCACCTCCTCCCGCCACCGGGACCAGCCCGCGGTCACCCAGCCGCAGCAGGAAGGGGTCGATTCCTCCGACGCCGCCGCCGCGGTGCCGCCGGCGGACGCCGCGGCGCCGGACCAGCAGGCGGCCGAGAAGCCCGAGAAGGTCAAGCG…
Seq_100498	Sobic.010G199700	Serk3A	Nicotiana benthamiana SERK3A (Serk3A) mRNA, complete cds.	Nicotiana benthamiana	CTCCCGAAAAGAAGGGTAAACACCACAGTACCATCCAGTATGTTCTCCCTGGATATGCTGTTCTTGCCGTAGCCGTCGTAGGCCTTCCTCTGCAGAGGGTCACTCAGCACTTGGTAAGCCTCTCCAAGAGCCTGGAACTTCTCGGCCGCGTGCGGGTCGTTGGGATTCTTGTCAGGATGCACCTGTCTCGCCTTGATGTAGTAGGCCTTGCGGATCTCGTCGTCGGATGCGGCGGGGCAGACGCCAAGCACGTCGTAGTACTCCGTCTCCTTCGCCATCGCCGCCGGTGCTGCTCCCTCCTAACCAAGAACGCCTAAGCAAGAAGCAGGAGGCCAGCAGCCGGGCATGGACAGACAGAGGAGACCGAGAGGAAGGAGCAGGCGACAGAGCTGACTGAGC…
Seq_100695	Sobic.006G187000	FLS2	Arabidopsis thaliana FLS2 (FLAGELLIN-SENSITIVE 2); ATP binding / kinase/ protein binding / protein serine/threonine kinase/ transmembrane receptor > (FLS2) mRNA, complete cds.	Arabidopsis thaliana	TCTCTCTCTCTCTCTCTCTCCCTTCTCCGGTTCTCCCTTCACTCGCGCTCTCCCTCCCCTCCCATCTCGTCCCTCCATGAGAGCCTAGGGCTACAGCCGCCAAAGTTGACAAGACAGTGAGAAAAAGAGGCGGCTCTGCTCTCTGCCCCCTCCCCTCCTCCCGGGCGCCCGCGATGCCGCCGTCGCGGTCGCTGTTCCTGCTGCTCATGCTCGCGCTGGCGCCACTCGCGTCGCTGGCCGCGACGGCGCCGGCGTCGCCGGTGGCAAGGACGGCCGGGGTGCAGGCGGAGATCGACGCGCTCCTCGCGTTCCGCCGCGGCCTGCGCGACCCCTACGGCGCCATGTCCGGGTGGGACGCGGCCTCCCCCTCCGCGCCCTGCTCCTGGCGCGGCGTCGCGT…
Seq_100924	Sobic.006G246300	Pid2	Oryza sativa Indica Group cultivar Digu B-lectin receptor kinase (Pid2) gene, complete cds.	Oryza sativa Indica Group	GCCTGGCCGCGTAGCTGCATACGTCCTCCTGCTCCTCCAGTCAGAGCGGTCTCTCATGACCTCCAGCGGGCAGCGCAGCAGTTGCTCGTCAGCGAGCACAAGGCGCTAGAAAGAGGACAGAACACGTCCAGGGTATCCACACAGACTCTAATCAAGCTTACGGCCCGGCCCCGGAAGCGTCATAGACATGGGGAATGCACTCGCAATCATATCTACAATCGTTGTGAACAAGAAGATGAAGAAGAAAATTGTAAAGAAAGTCTTGGAGGAGATGAAAAAGAACCGTGAGAGTGAGATGCAAGCCAGCAACGCCGTGGAAGATGTGGTGATCGAGGTCGGGCCAGTTGAGACGTTCCTCAATCAGATCCTCGACGAGAAGCCGATGCGTTTTAGCTCCAG…
Seq_100965	Sobic.006G245600	Serk3A	Nicotiana benthamiana SERK3A (Serk3A) mRNA, complete cds.	Nicotiana benthamiana	CTCTCTCTCTCTCTCTTCTCTCTCGCTCGCTGCTCGGCGTCCAATTCAATGCGCAACGGAGCAGAGCAGCGGCCTCCTCCTCCAGTCTCCACCATTGTCTTGAGCTCCGCCATTCAATGCCCGCCCGCTCTTGACTGAAGAGACCCCCTTTCTCTTCTTTAACCGCCCCGTGTCATCACTGTCGTCTCGTCACGCAGCAAGGCAGCATCAGGAGAGGAGAGAGGGGATCGAATTGATTGGTGGAGTTGTTCCGCTGAGGGAGCTCCTCCGGTCCTCCTTTCCGTCTTCTAGCTGGAGCTGGGCACTGCCATTGCTGGGCTTCTGTTTCTCTAGGTGGATCGGAGTGGGAGATGAATTACCTCCGGAGCCGGAGCCTGAAGCGGCTCCTGTCCCTTGGCC…
Seq_101143	Sobic.004G300600	RFO1	Arabidopsis thaliana RFO1 (RESISTANCE TO FUSARIUM OXYSPORUM 1); kinase (RFO1) mRNA, complete cds.	Arabidopsis thaliana	CCGAGCACGGCCAAAAAGGCGCGCACCCAGCGGCAGGCAGATCGAGCACCACAGCACAGCTCAGCCTTCAGCGCGACCTACCTCCCGCTGCTGCGGCGCGGTGCGCGGTGCGGTGTCCGTCCGGTGTGCTGCTGCTGCGCAGTTGCGCGGTGCGGTGTCGTGCGCTACCAGAAGCCCAGAATGCTGCCCGCCGGGTGCGGCCTCCTCTTGTGCCTCCGCCGCGACAAGGGTGAGGCCTCGGGGCGAACCGACGCCCGCGTCGCGGACGAGCCCGCGTCGTCGTCGTCGTCGCCGTCGCTCGGCAAGGGCGGCAGCGGGGCGGCCAGGCGGTTCGCGTGGGCCGAGATCGAGTCCATCACGGCGGGCTTCTCGTCCCGCGTCATCGGCCAGGGCGGCTTC…
Seq_101150	Sobic.001G446400	PEPR1	Arabidopsis thaliana PEPR1 (PEP1 RECEPTOR 1); ATP binding / kinase/ protein binding / protein serine/threonine kinase (PEPR1) mRNA, complete cds.	Arabidopsis thaliana	CCGCCTGCCTCGGACACCCACTCCACTCACCCCACCCATCCATGGCGATGGCGCCCTCCACGGCCGCCGCCTCCACCCTTCTCCTCCCCGTCCTCCTCCTCATCACCACCGCCACCCACTGTACCGCAGCCGACTCGTCCTCCTCTCCGGACGCGGCCGCCCTCCTCAACCTCTCTGCGGCGGTGGCGGACCCCTCGGGCTACCTCTCCACGCACTGGACTGCGGACACCGCGCTCTGCTCGTGGCCGCGCGTGTCCTGCGACGCCACCGACACACGAGTCATCTCCCTCGACCTCTCCGGCCTCAACCTATCTGGCCCCATCCCCGCCGCCGCGCTCTCCTCCCTCCCGCACCTCCAGTCGCTCAACCTCTCCAACAACATCCTCAACTCCACCGCCT…
Seq_101151	Sobic.001G195000	Pid2	Oryza sativa Indica Group cultivar Digu B-lectin receptor kinase (Pid2) gene, complete cds.	Oryza sativa Indica Group	AGAGGGCAGAGGCACCATCTCCATCTCCCTCCCTCCTTCACCCACAAGCCTCGGTGCCTCCTCACAAGTCCTCCTGTCATCTCTCCTCTCCTAGTCTCCTCTCTGGTTTGTGCAAGAAACTTCCTTGGACAAGATGGGAGTGCAGAGGTACAGGTTCTTCTGCTGCGGGTGCGGCGCCAATGCGGCGGCCGGCGACCGGGAAGGCGACGACGATGGGGATTTCGGGGTGTTCGACGACAAGGTAGCTGAGAAGGGGGTCGAAGCCGGCCCGCGGGGCCTGTCGTGGGCGCAGGTTGAGGCGATGACGGGCGGCTTCACCTCGGCCGTGGTCGGCGAGGGTGGGTTCAGCACCGTGTACCTCGCGCGCCTCTCCGGCGCGCTCGCCGCCGTCAAGGTCCA…
Seq_101170	Sobic.005G004300	Serk3A	Nicotiana benthamiana SERK3A (Serk3A) mRNA, complete cds.	Nicotiana benthamiana	GATGATGGCAAAGCGGTGGTGTTCATACCCAAGGGTTACAAGTTATCTGATGAATTGCCATCTGACTTGCACAGACATACAGAGATTTCAGAGGGCCTATCTGATGAAGCGCTGCAATCATGCAGGAAAACCTTAACAAAGGGTGTTATCCAGAGACGACTCCAAAGCCCAGAAGCAAAGATACATCATGTTGATCCTTCGTCTTCATCCAAATCTTTACCTCGCTGGGCAATCTACACAATAGCCATCGGTGGAGCACTTGTATTTGTGGCTATAGCTGCTGCCACTGTGTATCTACTCTTCTCTCGTCGAAAGAAGGATACCACTGTCATGCCATGGTCTACTGGACTCAGTGGACCACTCAGTAAAGCCTTCGTGGCAGGTGTTCCTTCTCTAGGA…
Seq_101254	Sobic.005G225800	Lr34	Triticum aestivum chromosome 4 clone BAC ABCT5; BAC ABCT33 map 4A, *** SEQUENCING IN PROGRESS ***, 7 ordered pieces.	Triticum aestivum	CGTGTGCTCTTCCGATCTCAGTGACGAGCCAGCCGGCGAGGAGGGAGTGCGGCGTTGCGTGGGAAGGACGACACGCGACCTGCAGCTAGCTGTCGGTAGCCATGGCGGGCACGCCGTCGCCGTTGCCGCGCTGGGCGCCGACGCCGAGCCCGTCGCGGCCGCTCTGGCGGCCCTGGGGCGGTGGTAGCACGCCTGAGGCTCACCACCATCCTGCCGGCGGCGTTGGCACCGGCTGGTGGTCGCTCGCGAGCGGCGTCTTCGCGTGGGGCGGCCGCGGGCGTCACCGAGGCTCGGCGTCGTTAGACGCAGCAGCAGCGGCCGGCGACGACATAGCCTGCGGCGTCGTCCCCGGACGATCGGGGTGCGAGTTGCAGGTTGTGCCATCAGCGGCGGCCGTGG…
Seq_101757	Sobic.008G052600	RFO1	Arabidopsis thaliana RFO1 (RESISTANCE TO FUSARIUM OXYSPORUM 1); kinase (RFO1) mRNA, complete cds.	Arabidopsis thaliana	GTCTTATAATTTAGAATGGATGGAATATAAAAATATGCACAAAGGCCCGGCACCTTGTCACCTTTGGATTCTTGTGGATCTCAACATAGGCGTGCAGACTTGTCGTCGCACCAACCGAAGACGAAGACGACGACGACGACCATGTGGTCTCTTCCCATTCCCATCAGGACAATAAAGCAGCAAGGCCATTGCTAATTCTTTTCTGAAGTAAATGTTACCTTCCTCTTCTCTTTTGTAGTTCTGTTTACTAATACGAGTCCTTTATTTGTCCAGTACTTCCACAATATCAGCTTCCTTTCTTTTTTTGATTCTTTCTAAAGTTTCAGAAGAACCCTTTACTGGTGGAAATGAAGCTGCTGCTCGATTCGCTGTTGTATGCTGTGCTTGTCTTCACTGTGA…
Seq_101802	Sobic.001G382266	Cre1	Aegilops tauschii go35 NBS-LRR (go35) gene, complete cds.	Aegilops tauschii	CAGCGCAGGTGAGTTTTTCTTCTCTACTCGAGGCGGCAGCCGCCTGCAGGCCGCAGCCACCCAGCGGCCAAGCAGGGGCCGCTGCTGTACCTCCACACCAACCGGCAGCCAGGGACGGCGGCTGCGTGCCTCCAGTCAGTTCGCAGCGCCTCTTGCCCCGACCTCAGACTTCCAGAGCCATGGCTAGCATTGCGGCAGTTGGGTGGAGCATATCCATAGCTAGTTGGATCATGTCACCCATCGTCACCAAGATCCTTAATGAGGGATTTGAGTTTCTTGGTTTCGATGAGTCTGAGAAGTTACAGGACTTGGAGTCTCGAGTGCTGCCACGCCTAGCGCTCATGCTGGAGCGGGCGGACAGGATCCCTGTTGAGCAGAGGGCTCGCGTGGAGCAGTGGG…
Seq_101957	Sobic.010G118100	RFO1	Arabidopsis thaliana RFO1 (RESISTANCE TO FUSARIUM OXYSPORUM 1); kinase (RFO1) mRNA, complete cds.	Arabidopsis thaliana	TTTTTTTTGTCAATGCTACAACTACTACTGTTGATTTTTTTTTTTACAACGAATTCAAACCTCAGGTCAGTACAGAACTCTTGGTAACAAGACCTCTCATGGCAGCCAAGACATCTTTAACGATCTAGTAACCACCTGATGCTTTCATCAAACAGCTACAACAAGGTCGAACCAAGTTCAACCCTCTTTACATTCTGATACGTTTTTTTTATCAAGTTAACATCTAACTCTATAAAGCAACCTACATACTAGAACAAGCTCATAAGTTCACGATGCCCTTATTGGCGTAAGTTCTTTCATGCTGGTGAGGTCACTAAGCTCCACATGCTGGTACTCTATCCTCCTAAGGACGGTCCTGGTCTCACTCCTCGGCAGAGTTAGCGCATCATGCTTTCTCAG…
Seq_102154	Sobic.001G240800	Serk3A	Nicotiana benthamiana SERK3A (Serk3A) mRNA, complete cds.	Nicotiana benthamiana	GGGAAGAAGCGAGGGAAGAAATGGGTGTTAGCTTGGACAAGAGGCTAACCGCGCGCCCTTAAGTTCAAAGCTTGCCGCCAAAGGAGATGGAACTGAGCTCAGCGCCAAGATCTGTGGTGTTGAGCTCGACGCCGTGAACCGTGGTGCTAAGGTCCCTATCACGTCATCATCACCAAGGCCTCCAGGGTGACGCCAAGGCCTGTGACGGATAGACGTGTTAGCTTGGCACCGTAACTTGTGGCGCCGACCGCTGACGTCTATATTCAGAAATAGGTCTTAAGTTAGAGGGTTAAACTCAAGAAATGTAATGCAAAAGCTCTGGATTTGCATGCGTACAATGGTGTTGGTGTTAGTGTACCAGCAGCGCTAGCTGGTTGTTGAGCACAACCGGCCGGAACC…
Seq_102221	Sobic.007G206700	Pid2	Oryza sativa Indica Group cultivar Digu B-lectin receptor kinase (Pid2) gene, complete cds.	Oryza sativa Indica Group	GGGTACCTCGGCCTCACCAACGCGGCCACCGACGGCAACGCCACCAACCGGATCGTTGCCGTGGAGCTCGACACCGAGAAGCAGGCGTACGACCCGGACGACAACCACGTTGGGCTCGACGTCAACAGCGTCGTCTCCGTCGCCACCGCCTCGCTGCGCCCCCTCGGCATCGAGATCTCGCCCGTCGTCCCCGTCAAGTACGACGTCTGGGTCGACTACGACGGCGCCGCGCGCCGTATTGCGGTGCGCATGGCCGTGTCGGGGAAGCCGAAGCCCCGGCGCGCGGTCCTCGCCGCGCCGCTGGACCTCGGCGCGGTCGTGGCCGACTGGTCCTACTTCGGGTTCGCGGCGTCGACGGGGCGCAAGTACCAGCTCAACTGCGTCCTCGCGTGGAACATG…
Seq_102223	Sobic.004G262500	Pid2	Oryza sativa Indica Group cultivar Digu B-lectin receptor kinase (Pid2) gene, complete cds.	Oryza sativa Indica Group	TCCAAACTGCCCATTTGTCCCCGGCGCACCCCCATCTCCTCGTCCGCAGTCCTTCCGCACCACACCACCCTTCCCCTGCGGCTCTGCGCCTCTGCCACTCTTCTCTTCTCCACCTGAAGGTTCCAGGCCAGCACATGACGACGGGGCCTTGGCGCCGTGGCGGCCGCGCCACGACCAGCAGCCTCGCGCTCCTCCTGTTGCTCCTCGCGTGCGTCGCCGGCTGCTCCGTCCCGTCCGTGCGCGCCCAGGCCACGGTGTTCACCGGCACCGTCGCCGGCAGGGAGATCACCAACTTCTCCTTCCCCAAGTTCGACCAGAACCGGTTGCAGCTCGCCACCAACCTGACGTTCACCGGCAACGCCAGCGTCAACCAGGGCGCGCTCCAGGTCACCCCGGACA…
Seq_102579	Sobic.007G027100	Lr10	Triticum aestivum resistance protein LR10 gene, complete cds.	Triticum aestivum	CCCGGCGATGGTGCGGAGAAGAGGGCGTGCAGACGAGTGCGGGGGAGCGGCGAGCGAGTGAGTGGGAGCGTGTAGAGAGAGCGAGTGAGTGGGAGCCTGCGGAGGGGGGAAAGCGGGCTCTGTGAGGGCGCGTCCGACTACCGTTCTGACTACGAACAAACACAACAATCCGATAACCGGTCCTCCCGATTGCTATTCCTGCTCCTTCTGGAGTCTCGCTCTCAGATTCTCCAACCTCCTTGGCTCCTTCCGGTGCTAACATCGCCGCCCATGGAGGTGTTGGAGGGCCTCATGAGCGCCCTCGCCGAGAAGCTCAGATCTCTTCTCGGTCGTGAGTACGCGCTCCAGTCCGGCGTGCGCGGCGACATCGACTTCCTCCAGTCCGAGCTGCAGCGCATC…
Seq_102877	Sobic.008G023300	Pi36	Oryza sativa (indica cultivar-group) CC-NBS-LRR Pi36 (Pi36) gene, complete cds.	Oryza sativa Indica Group	GGATGATAAATTTATTTAGAAAATTAGAGTTCAAATGTCATGATTATTTTCAAGGAAATTATATCATCCTTGTCTATCAAGCAAATACACAACCCATCTCAAAAAATGGAAAAATATAGTTTACAAACAAACTCTCATGGTCGATTCCAAGGACATACATGACCCATGTTACTAAAATATACTTCACACAAAATCAAACAAGATCACTTTTGAGGAAATATATGAACCATCTTATAAAAATAGAGACAAATATAGTTCACACATAAACTGCATCACTTGTGGTTCATCTGCCTCTTCAATGTCATTTTAGACCAAGAACCACAAATATAACATGCTGTGCGAATGCTTGTAACATCTCGTTGAATGAGACTTGTCTCTTCAGTACTTAAACAACTCACA…
Seq_103016	Sobic.010G020600	ER - Erecta	Arabidopsis thaliana ER (ERECTA) (ER) mRNA, complete cds.	Arabidopsis thaliana	GTCTGATCTCCCCCTCAGCTCCTCTCGGCTCTCGCTCTCTCTCCTCGCTGCGCGCAGAGCAGCGGCTGCCCCCCGAAAGCACCCAGAGTCACGTCGCTATCGCCAGCGACACCACAAAAACGCATCGCACGCAGAACCCCTCGCACTCCTACTCCCTCCCTGCCTCCCTCCCTCCTTGGTGGCCCGTCACATGGACATGGGCATGGTCGCATGGAGCAGCAGCAGAGGCACTTGCGCCGGTGCTAGCTGCGACGTGAGCTCGTAGCAGCCAGTGGGAAGGACTTCTTGGCCCGCCCGGGTTCGCTGTTGCCGGAAAGGCGGTGGCTTTGGGGAAGAAAGCGACGGTTGCGAAAGGTTCTTGTGGATTCGCGCACGGGAATGGCAGCGAGGGCGGCTGCG…
Seq_103223	Sobic.001G361300	RFO1	Arabidopsis thaliana RFO1 (RESISTANCE TO FUSARIUM OXYSPORUM 1); kinase (RFO1) mRNA, complete cds.	Arabidopsis thaliana	GCCCCCCATTCTACACAGGAATCACGCGCTCTTCAATCGCTCGCCCCCGTTTCTTCCTCCCCTCGCCTGCCTTCCTTTTCCTTCGATGTTCGATCCAGCGCTGTCTGTCGTCTTCGCCCGCCCCCGAAGCTCCGACCTTTTCCCCACTTCCCCTTGGCGTCTACGGCCTTGTCCGGTGTAGAAAACAACGGATTTCGTTGTGTTGCTTTGCTGCGGTTTTTGGCCGCTCCTGGAAGCTCAATCCCTGCTCCATCTCTTAAGAGCGCCCCTCCCCTCCCCTCCCACTCGGCGAGCTTTGTTGTTCGCTTTGGGTTCCGCGGCTTTGTTGCGGATTCTTGGTTAGGAAGGCTCGGCTCCTGGTTTGGGAAGCGCCCCCCCTCCCCTTTTCGAGGCGACGAA…
Seq_103261	Sobic.002G104500	RPG1	Glycine max NB-LRR type disease resistance protein Rps1-k-1 (Rps1-k-1) and NB-LRR type disease resistance protein Rps1-k-2 (Rps1-k-2) genes, complete cds.	Glycine max	GATTTAGTATGTTCTGGGGATCCTATTTTCCTAGATGAAACTCAAATCCTAGGATTTTCAAAGGGACCAAACAACTTGGATTGCACCATCTCAAAGAAACTGCATCCCCGAGTTGTGTCGCTCCAAACAGCAACATACAAGTAGACCTTTCCATAGATCATGAAAATAGTGAAATTAGGCAGGTTTTTTGTTTGGAGAGGCATGCCCATAACAATTTGAGCTCTTCTAGTCTGCATGGTGCAAACAGCCTTAAGTGCCTTGCTCACAACTGTCCCTGAGTGGGTTACATAAACCACGGTGAGAGCTCTTGGACTCATTTATGAAGATCATTGCATCACCCTACAATAATTCCCCTTTGTCTTTCTATTTCAATAATCATACCACACAGGCCCCAATTTT…
Seq_103310	Sobic.006G138500	Pto	Lycopersicon pimpinellifolium Rio Grande-PtoR protein kinase mRNA, complete cds.	Solanum pimpinellifolium	TAGAAATTTTAGAAGTCAGAATACACTATATTTCAAGAATGAGTATCTAACTGCTTTAAAAGCCTCACCCAACAACAATGCAGCTGTTTCCTAAAGTACAGCCATACACAGAAGCTACACTGTACTTCTCGAGGATACAGATTACTGAACAGCTTAAGCTGATTAACAGTAATGGCTACACAGGGAAACCATCAGTCGCAGGACATTGTTCTGCACATCTCTTAAACATAGAGCCATATACAACATACAACAACATTTTTGCAGCCCTCTACAAAATTCTAGTTGTTCACAATCACAAATTTGCATTATTTTCATGTGGCCATCTTTGGTCTTCACAAGGAACTGACCCATGTTCTCCCAAGCAAAAACGGCAACCAGGATCAGATGGTTTAAGGATTC…
Seq_103371	Sobic.010G094900	RFO1	Arabidopsis thaliana RFO1 (RESISTANCE TO FUSARIUM OXYSPORUM 1); kinase (RFO1) mRNA, complete cds.	Arabidopsis thaliana	GAACAGGAGAAGCAGGCGCGACGACCAGCCAGTTGCAGCGGGCGAAGCCATTAACGGGAATAATTTAATGCGGCTTCGGGTACACGGGGGCAGGTCAATCCTCGCACTCCACCTCCTGCCCGCCCCCGCACCCGTAGCCATGTTGGATCCACCGCCCCACCACCACGGGTAGCTGCAGGGGCGGCGGCGGCGGCGGCAGTGGCGGCGCGGCAGAGGGATGAAGAACTTCCTCAGGAAGCTGCACATCGGCGACTCCGCCGCCGGGGACGGCGCCTCGTCGCCGTCGGCACCTCCCGCGCCGCCAACGAAGAAGGGCGGTGGCATCGAGCACAGGCACGCCTCCGGGTTGTCGGGCTGGCTCAGCTCCGTGACCGGACGGCCGCCGCACCCACCACCACC…
Seq_103387	Sobic.006G050700	RPG1	Solanum bulbocastanum putative disease resistant protein RGA2 gene, complete cds.	Solanum bulbocastanum	GATCCACCAACAATGGCGGCAAACGGACCACGAGCACGGCCGCCTCCACCGTCGCCTACAGCCTACTCGCCTGTTTGAGCGGACGCGCGGCCACCTGCCCGCCTCGTCTTGACGGCGACGGGGATGGCCGGGGCGGCAGCGTTCGCTTCTGCGGCGCTGGAGCGTGCGATCGGGACGCTCTCCTTGCTGCTCCCGGGCTTCTTCCCTTCTGCGAGGCACGGCGAGGAGGACGCGGAGGAGCTGGGGCGGTTGGTGAGGACGATGCGGCGGATCCGCGCTGCGATCGATGACGGCTTCCCCAGCCGCGCGCCGGGCTCCGCTTCCGCGTCGGCCAGGCTCCGGCTCAGGGAACTGAGGGGCCTGGCCTATGACGCGGAGGACGTGGTCAGCGAGTGCGAG…
Seq_103844	Sobic.001G533700	RPG1	Hordeum vulgare subsp. vulgare RPG1 (Rpg1) gene, Rpg1-Swiss Hv 489 allele, complete cds.	Hordeum vulgare	TTTTTTTTAAAAAATAATCATGGCCTTGATGTCGATCCATATAGCTGATCATGAGGCAGAGTCTAGTTCAGGGTCCCAGCCGAAGGCTCTATGCTGGGACAGTCCCTTGTATACAGTAGCTACACAAGCATTCCGCTGTCTATAGACGCGATGCAGTTATTGTCCCAGTCTTTCTGACTTCTGAGGTACAAGTACAATGGTACTATACGGCTATACCTATTACTACTACTAATATTAGAGGCTGGCGTCATAGCCATCTTAATGATAGATGCGAATGCGATCAAAATGAATACACATCGCAAAGACGCCTAAAAACTCACTGAACAAAACAAACCCGAACGCAACGGGTCGACTGAATAAACATAACAGTTCAATCCGAGGCCAACGATCATAAACCCC…
Seq_103863	Sobic.002G419200	Serk3B	Nicotiana benthamiana SERK3B (Serk3B) mRNA, complete cds.	Nicotiana benthamiana	CTCCTTTCCGTCCCGTCCCTCTCCTGTCCTGGGCTGGGAGCCCCCCTCTCCCGTCTGCCGTCTCCCCAGACTCCCAACAAAGCCCCTGCCCCCAGCGGCACTCGGCAGCACTGCAGCAGCGCGCAAATCCTCGCCCTGCCGACAGGGGCGCGCCACGGCCGAGCCCTGAGCCCGCACGCGCATTTGCTGCGGCTCTCGGTGCGCTCCGCTCCGCTGTACCGGCGGCTATCGCCGGCGGAGTGTCGATTTGACGAGGGTTCCGACGAGGAAAGGTCGGTGCTTTCCCTGTCCTTCCACGACTTGACATCCTGTGTGTACTCAATAGGAGCCCAAATCTACGCATTTCTCCCATTAGGTATTAATTAAGGGTTGCTTACTTTGCCTGATATAGTCAATTGA…
Seq_103881	Sobic.004G073500	Lr34	Triticum aestivum chromosome 4 clone BAC ABCT5; BAC ABCT33 map 4A, *** SEQUENCING IN PROGRESS ***, 7 ordered pieces.	Triticum aestivum	GGCGGATGTCGTGCTCGACCGAGCGTGCTATCCTTATCTCTGCGTTCTCTTCCGCCGCGTCGCTCGTATTCTCCGTCGCTCTTCCGCCGCGGCGCTCGTCTTCTCTATCAACCTGACTTGCCGGCTATCCGTACATGCCATCCCACTCCCCTGGCTCCGCCTCGCGTCTCTGTATCCTGCCCCTGTCTTCTCTGCCTTGGGCACGTCGCAGCTAGTTTTGACGGAGGCGATGAGGGCGGCTGATTCGAGCTCTGGTGGCCAGGTGCGGCCAGCCCACCTTGGGGCAACGAGCACCGGCGACGGCAAGCTCTCGCAGGGCAGAGGCTAGCACGCACATCCAGTTCAGTTCAGTTGGTGGAATATTTCTTACAAAAATCCTATGCAGATGCTCGTCCTTCA…
Seq_103883	Sobic.004G073500	Lr34	Triticum aestivum chromosome 4 clone BAC ABCT5; BAC ABCT33 map 4A, *** SEQUENCING IN PROGRESS ***, 7 ordered pieces.	Triticum aestivum	GGCGGATGTCGTGCTCGACCGAGCGTGCTATCCTTATCTCTGCGTTCTCTTCCGCCGCGTCGCTCGTATTCTCCGTCGCTCTTCCGCCGCGGCGCTCGTCTTCTCTATCAACCTGACTTGCCGGCTATCCGTACATGCCATCCCACTCCCCTGGCTCCGCCTCGCGTCTCTGTATCCTGCCCCTGTCTTCTCTGCCTTGGGCACGTCGCAGCTAGTTTTGACGGAGGCGATGAGGGCGGCTGATTCGAGCTCTGGTGGCCAGGTGCGGCCAGCCCACCTTGGGGCAACGAGCACCGGCGACGGCAAGCTCTCGCAGGGCAGAGGCTAGCACGCACATCCAGTTCAGTTCAGTTGGTGGAATATTTCTTACAAAAATCCTATGCAGATGCTCGTCCTTCA…
Seq_104608	Sobic.001G279900	RFO1	Arabidopsis thaliana RFO1 (RESISTANCE TO FUSARIUM OXYSPORUM 1); kinase (RFO1) mRNA, complete cds.	Arabidopsis thaliana	GTCTTCCAATAGAAACAATCCCTTTATGTATTTATCTTAAATTAAATCGTAGACCATTTGCAGTAACGTGTGCCGTTACATCCATCAGAATACCATATCAACAGAATCAAGAAATGTGAGAAATCCAAAACATACATTCTCCGTAGAGTGCACTGCAAACCGATAGATAAGAAAGTACATACTGACGGCGTTATCACACTGTACATTGTTCAGACCACATCTTCCAAGTAAGAAACATACCATAGATGTTTATCCAATGGGCATGAATAGTTAGCATGCTTAGTCCTTGGTTGAGGCCTTGAGGGAAAGGCTTGAAAAACAGGTAATGTTGTCCATGATCTTCACACCTTCCTAATGCTCTTTCCGTACTCTTTCCTTATTTCCCACAGCTGCTCCCCA…
Seq_104613	Sobic.003G045700	Lr34	Triticum aestivum chromosome 4 clone BAC ABCT5; BAC ABCT33 map 4A, *** SEQUENCING IN PROGRESS ***, 7 ordered pieces.	Triticum aestivum	CGTTTTGAACCTAATTAGTCAACGATTGGACACTATTTATCAAATAAAACCAAAACATGTTGTAGTACACTCTTCACCCTTTTCAAGCAACTAAACACAGCCTACCAAGACGCTGCTGGCTTTTGCAGCCCTTGGAAGCACTGCGGCTGCCGGCTGGCTACGCTACGCATCCAAAAGAGAGAGTATCACGCAGGACGAAGGCTGCATGCCAAAGCCGCAAAGCGGTCAAAATGCCCCGCAGGTGTCGACCGCCCATAGGCGCAGCGGCGGCCGCTCGTGGGCGCCGGAGAAAAAGGCACGGTCAAAAAAGACCTGCATGAAGCGACGCCACCTTATAACGATGGAGGGGAGGCCAAGGGCCAAGGCAGCAAGTACATGAAAAGCTGGCTATACAGTTTT…
Seq_104649	Sobic.005G048400	Pi9	Oryza sativa (indica cultivar-group) putative nitrate-induced NOI protein (75-1-127BAC12.1), putative NBS-LRR disease resistance protein (Nbs1-Pi9), putative NBS-LRR disease resistance protein (Nbs3-Pi9), and NBS-LRR disease resistance protein (Pi9) genes	Oryza sativa Indica Group	TAATAGATTCGTCTCGTAAATTATTCCTAATCTATGTCGACATATATACAATTAGTCTACATACAAAATGTTTTTTTGTTTACATCATCGACATGGGATGACTTTGTAATAAAGATGGAGCATACCGTTTGTTGGCATGTCGTTCTGATTATCTAGTGCAGAAGTAAATAGAGCCAATGTGCAAGTGCAAATTCGAATTAACAACATTACTAGTAGCAAACAGATGAAACAAACCAAACACGGGGAGATTCGAGCAGTAGCTGCCAACACGACTCTTCTTGGCACGCCCAAGACCTGCAGCGTACAGAGAGAGGCTATGCGCACAGCCACACAGGCAGAGCAGCAAGGTAGCTGCGTCAACTAGAAGCAGGCTGGATTTCACTGTCGGTCGTGGTTTGT…
Seq_104666	Sobic.003G387300	Lr34	Triticum aestivum chromosome 4 clone BAC ABCT5; BAC ABCT33 map 4A, *** SEQUENCING IN PROGRESS ***, 7 ordered pieces.	Triticum aestivum	CACGGCCAACCGGAAACGGATCCTAGGCTAGCTTTGGTTTTCGAGTGTAAATACAAGTGTATATGTATGTATGTACGTACGTACGTACTCCTATATAATGGAGTACGTATAAGAGTAGCAAGCGCTCGTACGTACCAGTGTCCTCAGCTCAGCTCCTTCCACGGGGAGTGGGAGCCCGCCACACGCTCACTCTCCAAGCTCACCCGCCATCCGCCATTGCTAGCTTCTCTAGCTGAGACGCATATACCGATCGAGCGCGAGCCATGCCACGCCCAGTTTAATAAGTAAGGCAGCCGCCGCCTAGCTCATCATCCGCGCCAATTAAGGAGCAAGACAAACCACTGTACCGTCACATCCGCAGCAGCAATGGCAATGCCCAAGAATTCCTGCGCCGGCGGC…
Seq_104728	Sobic.006G017500	RPG1	Arabidopsis thaliana RPS2 (RESISTANT TO P. SYRINGAE 2) (RPS2) mRNA, complete cds.	Arabidopsis thaliana	CGAATATTCTTAGGAATACAAATAATTCACACTCGTGAAAATGGTAACAAGCCAGGTTCTAGGGGACGCTTAAACACACTGGCACACAATACAGCAGCCCATCAGACCCTCTTATTTCACGCACACATAAGCATGTAAGACCAAGCAAGCGGTAGCACACCGATTGAATTTGGTAGATGCAGTAGCACCATGGAGACACACCAACTTTTTATTGTATATATATTGAGAAAACACACCGAGACTAGCTTGGCAGGCAAACACGAGGAGACAGAAAGCAGCCAGTAGCTACAGTCGTCTCCTCGATTATCCCATCATCAAATCTGGACAATGCAAGCGATCAGCAGCAAGCACCCGAGGTTGGCTACTCATCGGAGCACTGCACCTCTCAGCATTCGCTTC…
Seq_104729	Sobic.006G017200	RPG1	Arabidopsis thaliana RPS2 (RESISTANT TO P. SYRINGAE 2) (RPS2) mRNA, complete cds.	Arabidopsis thaliana	AGTCCATGCATTTAAATCAATCAAAACCATCTTTTACTACATACAGAGTTGATCACAAACTAGACAAACGTTTCCTTGAGTAAGTCTTTGAGCAATCCAAGCCAAACATACGTCAGGGACATGCATGCACATCCCCCCTTATTTCAAATTCAAGCACACATGCACACTCACAACCACAAACGAATTAAGTCTTAAACACAACCATTTTGGTGGATGCATACAGCGTCGAACCACCTGTTTATTCTTGATGAGAGAAATAAACACACTTGCAAACACAGTTCACCAACTAGTGAAGCAACAAATCCTTGATGATCCATATTGCAGCAGCAACAGCTTGAAGTGGAATTGAAAGCGGCAACACATGACGCATGACAGGCTTGGCACCGCCTAAACCTGGAC…
Seq_104761	Sobic.005G034500	PEPR1	Arabidopsis thaliana PEPR1 (PEP1 RECEPTOR 1); ATP binding / kinase/ protein binding / protein serine/threonine kinase (PEPR1) mRNA, complete cds.	Arabidopsis thaliana	AAACAGAGCACGAGCAGCCAAGAGGTCCCAGTGGCCTGGCCACTGCCTCAGTCCAAGCTCAGCTCCAAGCTCCAGCCTCCAAGCACCAGCTCGATTCAAAAATCAAAAGTTGCACGGTCGCCGGTAGGAGTAGTTCTCTCGTCCCAATGCAGATCGATGGAGCAGCCAAGATCACCAATGGCTTTGCCTGAGTGATTCCTCCAGACCTCTCCTTTCCTCCCTCGCCCCCTCCTCCCACGCCGATCTTGCTGTACTCGCCGCCCCGTCATCCACGCCCGCAGTCGCCAGCAGCGGCAATGGCCGTACAGTTCTTGCTGCGCTCCGCGGCATTCCTTGCCATCCTGGCGGCAGCAACGCCGGCCGCCTTGCCGGAGCCGGAGCCGGTTCCGGAACCCGAGG…
Seq_104871	Sobic.005G192400	MLA10	Hordeum vulgare MLA10 (Mla10) mRNA, complete cds.	Hordeum vulgare	GGCAAATCCAAATCCCTTCAGAGTTACAGATCCCCAAATACACACTACTGCAACAAGCCAACGAGGTCAATAGGTCATACTGAAGATTGGTGTGAAGAAACGGTACAGGCGTACAGCAAATTAAATACAGCGCTGAAGCTGACGAAGGGATTATGTTTCTTCGTTAACATGATTACATGGACTAATCAAACCACTGCACTCAAAAGAAACACGCCCTATCTACAAGCACTTGTGTATCGCAAATGAACGTGATGTCGCTGGTTTTTTTTTTCCAGAACGAAGAACTGATGTCTTCACAAGTTACTGCAATGACGACCATAAAGATAAAGATTCTAAAGATTAGTGAAAGAGGCTAGAAACTTGTCGCGTCAACACCCTTGCGTTTTGTTCTTTCCATCG…
Seq_104964	Sobic.005G075100	RPG1	Glycine max NB-LRR type disease resistance protein Rps1-k-1 (Rps1-k-1) and NB-LRR type disease resistance protein Rps1-k-2 (Rps1-k-2) genes, complete cds.	Glycine max	GAGTTCCCTTTGCACTCGCCAGCCAGTGGGCGACAAAGATGCACATATCTCTGCTTACAGGAAGTCAGGAACCACAAGGTACTATACTAGAACCAGCAATATAATGCAAATATGCATGCTTCATCATGATTAACGGCAGCCTCTTTACGCCTCATGATCATAGTTTAGTTGGTCCTCCTCTAGCCCTCTGCTCACCCACACTAGTAACGGAGTAGGCTGGTACGACTACAAGTTAAAAATGAGCAGTGTATATGATACAAGATAATCACATCACATCCTTGTAAAGCAAAGCAACAGAGTTCTCAATAATCCAGAAAATTTTTGGTGATCAACTGACAGACCAATCCATCGTCATTCTCAAACTTGTAACCAAGGGTTTGACGCGGCCGCGTTTGAGTG…
Seq_104969	Sobic.006G215400	Serk3A	Nicotiana benthamiana SERK3A (Serk3A) mRNA, complete cds.	Nicotiana benthamiana	AACAGCAAGGATGTCACCATCATCTCTGAGATACTATGGCATTGGACTTGAAAATGGAAATTACACAGTCACACTTCAATTTGCAGAGGTTGACTTTCCAGACATGCAGTCTTGGAAAAGCAGAGGGAGGAGGGTTTTTGATATCTATGTCCAGGGAGAGCGCAAGGAGCAGAACTTTGACATTAGAAAGGCAGCAGGAGGGAAATCTTTCACTGCTGTTAAGAAGCAGTATGTTGTTCCAGTAACCAAAAACTTCCTTGAGATTCATCTCTTCTGGGCTGGCAAGGGCACTTGTTGCATTCCTTATAAGGGATACTATGGTCCTGCAATATCAGCCCTGAGTGCAACTCCAAATTTCGTCCCTACAGTCCGTAGTTCAGCAGACAGCAAGAGCAGCCG…
Seq_105825	Sobic.003G052100	Cf-2	Lycopersicon pimpinellifolium leucine rich repeat protein Cf-2.1 gene, complete cds.	Solanum pimpinellifolium	TCTGACCATCTCTATCGTTCTCGTTGTCATCGGCATATAACAATTTGCATTGCATCCTGGTGTGGCCTATGGCCATGGCAATGGCATGCCTCGGCCTCTTCTTCTCCCTCTACTAAACCTGTTGTCACTGAGGCTTGTCTTAAACCTCGCCACCAATCCACCTACTCCGGGCTTTGCAAAGTTGCAGAGCCACTTTCTTGCGCTGCTGCTGCTGCTGCTTCCAGCACAAGCAACGACACAGATTTGCAAGTGACACCAGCTGCAGCTGATCCTACAGCATCACCTCACCTCATCCCCTTCATCGGGTTCATCGCAGTTTGGTCGCCTTGATGGATATGCTTTGGAGTGAAGTACAGCGTCAAGTGTAGCGCTTGCTGCCTGGCGACTTGGCAGGCGGTT…
Seq_105974	Sobic.010G046700	Lr34	Triticum aestivum chromosome 4 clone BAC ABCT5; BAC ABCT33 map 4A, *** SEQUENCING IN PROGRESS ***, 7 ordered pieces.	Triticum aestivum	GAAATACTTCATTCACTTACATCATTGATATGATTATGTTGAGCTAGTATAATATTTTCTCCAGAACTGAAAACAAAAGGATTTATGCCAATTAGTAAATTTGTGAACTACATAAGCCAAGCCGGATTCACGGCCCAGGCTGGGGGGGGGCTGCAGCCCGGGCGTGGCCCAAGTTTTATGGGAGCAGCTTTTCGGCAACGCCCAGCTTTCAGCCCACCAGCCGCATCTCGCAGTCGCAGGCCTCTCCAACTTTGGACTCCCGAAGTGCGCGGTATCTCTGTTGCGACTTCTGACTCAACAGAAGTCAGAAAAACGCCCATTTTGCCTTGATGTAGACTTGATGTGCCTACCACCCATTTTGCCTTTTATTAGCTCACTATTGCAGCAAATAAATGCTGA…
Seq_106327	Sobic.009G026800	Serk3A	Nicotiana benthamiana SERK3A (Serk3A) mRNA, complete cds.	Nicotiana benthamiana	TTTTGATCCAGCTGCAGCTCGAGGAGGACGACAATGGCTGAGCTAGCTGAACTAAACGAACGAATGAATCATGTGATTTCTGAATTATGATCGAGAGAAAATGTATGTAATGTAACAAATGGAGGCTGGCTTTGATGATCATCTGGACTCTGCAGTCCATTGCTGCTACTAAAATTCTATGTACGCATCAATACATACATTTGCTGTTTCTTCTTTTCGCGTTCGAGATCGACAAGGATTCAGAAGAAAAAACTCTACCTAGTACCCCCGCCGCTCGCCGCCGGCCGGCCAGGCTCAGGTAGTCAGGTGTCACCTGGCGTCGCCGGCGGTGCTGCTGAACCCGATGTCATGGCCGCCCCTGCGCAGCGTGCTGGTGAGCGACGACGAGCTGAGCGAGTC…
Seq_106429	Sobic.009G246800	Serk3A	Nicotiana benthamiana SERK3A (Serk3A) mRNA, complete cds.	Nicotiana benthamiana	TAGTCGATAGGTACCCAAAGGTAGCTAGCTTTTGTGCGTCGTCAATTCTTCATCTTCCCCCGTACCGCTAGCCGCCGTGCTTGTCGTCCACACGCCACAGAGCCTGCTTTTGGAAGGCCATCTTCCCCACCTGCCCAGCCCAACCACACCAGCAGTCCCTTCACACTCGTTCCGTCCCCAGTTCATTCCAACGCTTATGGAATGGAAAGCCTCCACCGCCTGCCCGCGGCCCGCGCTTTAATTTCTTTCCCTCACGCGCACTAACCGCACCACCACCACCGCCCGCCGCTTAGCATGAGTGGGCGTTGCACTCGCTGATCGCTAGTCGCTTAGCAGTTCGCACTGCCTGCCGGTCCAGCCATGTCGTCGTCGTTGCGCCGTCTCTGCTTCGTGCTGCCG…
Seq_106506	Sobic.002G205900	xa21	Oryza sativa Indica Group Xa21 gene for receptor kinase-like protein, complete cds, cultivar:II you 8220.	Oryza sativa	GCACGCCGAAGCTGTACACGTCGCCCTTTGTCGTCGGGTTCGAGCCGTAGCCGTACTCTGGAGGGATGTATCCGATGGAGCCGCACAGCATGTTCGCGGTGGAGGCGCCGACGTCGGCGGTGTTGGCCACCCCGCCGATGCTCATGACGAGCCGGGAGATGCCGAAGTCGGAGACGAGCGCGGTCATGTCGTCGTTGATGAGCACGTTGCTCGGCTTGAGGTCGCAGTGGATGACCTTGACCGGCGAGTGGTGGTGCAGGTACGCCATCCCCTCGGCGATGTCGCTGCAGATGTTGACCCGCTGCACAAGGCTCAGCTCCGCCGGCGGCCCCGCGTAGAGGCACCGCTCGAGGCTGCCGTTCGCCATGAACGGCAGCACCAGCGCCTTGAAGTCCGGCA…
Seq_106570	Sobic.002G341200	Serk3A	Nicotiana benthamiana SERK3A (Serk3A) mRNA, complete cds.	Nicotiana benthamiana	GGCACGAAATTTAACTTTAGAAAAGTGAAATGGACAAGGGTGGGAAAGAAAAACAGGAACTAGCCAACATGAATCTTTCATGTACATTCCAGTATTCCACAGCCCTGCTCAAGTTCCACCCACATTCTACCTTCTCCTGTTTCATCAAATCAAGGCGACTACAGCAGACCCAAGTTCAACGGGACACCAGCAAACTACATGAAGTTCTAGCAAAACTGGCCAAAGTCCAAACCTCCCATGTCCAACACCACAGAATGATGCATCTCAACCAGCTATTCATTGAACTATAGACAGCAACTCAGCATCTTGCACGTCTAGGTGGGCTGCGAGGCACGAGCCCGTGCCGCCGCTCTCTCCAAGGCCTTGAGCCTGTTGGCCTCCATGCGTGCCTTCTGCTCC…
Seq_106582	Sobic.002G393800	Pi-ta	Oryza sativa (japonica cultivar-group) pi-ta protein (Pi-ta) gene, complete cds.	Oryza sativa	GTAGTCAGTCCTCAACTCTAAAAGGTACAGATGTTTTACCAGTAGTAGTGAACCAAAAGAGCCTGAAAAGGCTATTTTTTTAGTTTTATCATTAATTTTTTTCTAGATGTCACCGTAACGTTAGCACGGGCAATATACTAGTACAACAAATAGATGGCTTAGTCATGGACGCATGAGTGCTGGCGTAGATTAGAGTTGCTTAAGACCAAAGCATGTTTTTTTTCTAACCGGATATACTAGAGTTGCTTAAGGGTTAAGGCCGAATTTGTGGGTCTCCCTCTCCCCTATATATCGTCGAACTGTCAAAGTGCCACACTCATAGATGTAGTCACCGGTACCATTTCTAATTGTGCAGACTCATCCTTCGGTTGTTGTTTCAGTCAGAGAGATCATGGAGGG…
Seq_106848	Sobic.010G161300	Serk3B	Nicotiana benthamiana SERK3B (Serk3B) mRNA, complete cds.	Nicotiana benthamiana	CACAAAAAGGTCTTGGAAACCAACTGTTGTTACCGGCAAGGAAAACTGTTACACATGCACATACTAGCAAAAGTACAAACTACGAGCTCTGGTTCTGGTCCACACTACACCAGGGCACCGTGCACCAGCCACCCGATCCATGGATGGACCATGGATGACCCACAAGGCATAAGGCAAAGCAGCGGACGGACGCTTCTCCTCGATCGGGAGGGGACGACCACTGGCCCCGGCGCGGCTTCGTGCAATCTGGAAGGGACACCGGTGCCGGTGGCGCATGCATGTGTCCGTCCGAGTACGACCCCCGGCGTGGCTGCTGGTGGCTCGATCACACGTACTCACACTGATGATGGATGGCTCAGCTGCCCTGCCCAGCCGTGAGAGGCGCCGCCGCCCGGATGT…
Seq_107006	Sobic.009G013000	RPG1	Solanum bulbocastanum putative disease resistant protein RGA2 gene, complete cds.	Solanum bulbocastanum	CATAATAGTAATCTATAAGCTACAGGATAACAGTGTAACAGTATCAAACTGCCGTACATCTACACATGTAGTATTGATCTTTATAGATAGCTAGCTAGATAGATATAGAAAGATAATAATACAATGCATCGGTAATAGTCTTACAGGCAGCAGAATGGACCAGTGGTTGCATTTGCCGCATTCACGTGTAATATGTGTTTTGAAGACCTGCTCCTCATCCCTCCAAATCATATGTAGTCACCCTAGGAATGTGACTGACAAGGTGCCAGTCGGGCCCTGCCCCTGGCTTGTAACGCTCCGCCAAACCAGGGCAACCATTAATGCGCAATTCCTCGAGAGCAGTTAGGCGTCGAATGGATTGGGGCAAGCATTGAAGGGCAGGGGAATTCTGGATCCAAA…
Seq_107011	Sobic.004G117000	Lr1	Triticum aestivum Lr1 disease resistance protein (Lr1) gene, complete cds.	Triticum aestivum	ATTTGTTGCGATAGTTTAGTGTTTGCACGTGGTCATACAACTACAGATGCTGGCACTGGCCAACAAAGTAAGAACCTGAAGAGGACTGCTTTGGTCTGCATTTTCGTTGATGAGTCCAACTAACATGACAGTTGCAGACCAAAACTCGTCTGTATTGTTACAGGACCTGCACGCTGCATTACTGCAGTCTCTATAGAACAAAAAAAGTAGCAACACTCCTAATAAAGGAGATAAAGACATGATGAACAATAGTATAAATCATGGAAGAGACATGACGGCCTACTTTTTTTTTTGAGGGGAAACATGACGGCCTACTTGATCAGGAGTTTTTTGTTTTTATGTATGGTGTTTGGTGGAGCGATCGTCGCATCCATTTCTTGGGCCAGTAGCATTTTACTT…
Seq_108298	Sobic.004G093100	RFO1	Arabidopsis thaliana RFO1 (RESISTANCE TO FUSARIUM OXYSPORUM 1); kinase (RFO1) mRNA, complete cds.	Arabidopsis thaliana	GCAAAAGTACATCTGCTATTCAAATTACTGCGTGTGCGTGCAAAACCGAGCTAGCGGAACCACATGCGCGCGTGAAAAGGAGCGGGCGGGACGGTCCCACAGGGCTCGCGCGCACGTGCGATAGAGCAGGCGGGTCGGCGCGTGAAATGCAGTGGGGCAGGGCGGATCTGCCGCGAGTCCGAGCAGACAGGGCATAGCAGGGAGCTGCGTCCGGACGTCTGGGCGCTAGGTGTTCTGGTTACAAAGTCGTTCGTGATTCTCTGCTTTACAGCTGCCCCTTTCTCATTTACAGGCTGAACAACTTGTGAAATCCGAAAAGCAAAGGCTTTTGGCGTGCTCGCGAAAATAGTTTGACCACTATTAACAGTTGAATCAAGAAGAGATATGAACCTGACTCCC…
Seq_108685	Sobic.010G176800	Lr34	Triticum aestivum chromosome 4 clone BAC ABCT5; BAC ABCT33 map 4A, *** SEQUENCING IN PROGRESS ***, 7 ordered pieces.	Triticum aestivum	GTCATCAGTACACATTTACGTGCAGCAACAACTTACAGTACAAAATATACAATAAATCAATGATCAATTTACAAATACATCACCTACCAACACCTACCAAGAAAGAGAATGAAGAAAAAAAATCAATTCCATCCAAAGAATCCTTGTTATCAAAATTCCAAAATCAAAGGGGGGCAAACCAAACCATTTGCTTTGTAACAAAAGAATTTATGCGTGCTGTACATATATACACCTAGCACCAGCAGCAGGCCCTTGCCGTTGCCTTAGCACCATTGCATCTAGACTACGACTCTAGGAGAGTTCTTCGCTGGACTGGGCCCCTTTGGCGACCTTGACAAACACGTCCTCCATGGTGGTGTCCGCGAGGCCCCAGGCCTGGACCTCCACCCTCTTCTTGAA…
Seq_108874	Sobic.010G155401	xa21	Oryza sativa Indica Group Xa21 gene for receptor kinase-like protein, complete cds, cultivar:II you 8220.	Oryza sativa	GCGAAAGGGTGCTGCTTATCTGCGCTGCAGGAGCTTCCTGGCAAATAAGCTTAACTGCACCCGAGTTCTATCAGCTTTTTCTGGAAAAAAAAATATATCAGAGACAATCCAACTCAAGATGAGAATCTATGTTCAATGGCTGGTTTCCGTGTCTGTATTATTATCTACTGTTTTCCTGTTAGGTTCATGTAAATCAACTCCTCCAAGCAACCTTAAGGACCGAGAGGCTCTACTTGCTTTGAAATCCTGTATCACCAAAGATCCGTCAGGAGCGCTATCGTCGTGGGGGAATGGCTCCTCGGCGTGCACATGGATGGGGATCATGTGTAATCACGCAGGTAGGGTCTTGGAGCTGGACATCCGAGGTCTCAACTTGTCTGGAAGGATTAGCCCTCACAT…
Seq_110398	Sobic.008G097900	RPG1	Hordeum vulgare subsp. vulgare RPG1 (Rpg1) gene, Rpg1-Swiss Hv 489 allele, complete cds.	Hordeum vulgare	TATGGTGCCAAAAATTGCAGACTTCGGTTTGTCAAGGCTTTTCGGTGAAGAGCAAACTCGAACTTGCACTGCAAGTCGTGATGGAACATTGGGTTACATGGCGCCAGAGTACTTAAACAGAGGTATAATCACAAAAAAGTTAGACATATTCAGTTTGGGTGTAATAATCATAGAGATAATGACGGGGCACAAGGACTACCCAGATGAGACTGACACATCATCATCCCAGGAATTTATTGAGCTGGTGCTTAAGAATTGGAGAAATAGGCTGGAAAAAACACGGAGATATAGAGCTGCCTTTTCTATTTTTCCATCTTTTTACCGAGAAATTGATTACCAACGAATAAGAAGATGCATTCAGATTGGTCTAGACTGTGTGAAACTTAATCGGGTGAAAAG…
Seq_110679	Sobic.010G046200	Pikm2-TS	Oryza sativa Japonica Group Pikm2-TS mRNA for NBS-LRR class disease resistance protein, complete cds.	Oryza sativa Japonica Group	AGACTATCCAACTTTCCCACGAGGCTAAAATTAGTGACAAGCAGGGGAGGTGAATCCACAAAAGCCAGAATGTCTAGAGATGAGTCATGCTCCTTTTCATCTATAATGTGAATAGAGAGTGTGTGAAGAGAGCATGCCAACTTTCCCAGAGACCCGACAAACGCCTTCCAGTTAACTTTCAAATTCCGAAGGAGGACTTTAAGCTTCCTTAGCTTTTGTAACAGACCAATCTCCCGTAGAACCAACGGCTCATCCTTAACCACTATATAAGTAAGTGATTGCAGAGCTGCCATGTTCCTGACCAATGTTTGAAGAACTTGACACTGCCCGTCCTTGTAAGTAGTTCCTTGTGCCCAGCTAACAAATGCTTCATACAACTGAGGTTGTTTGCACTGGACG…
Seq_111614	Sobic.006G229300	Pid2	Oryza sativa Indica Group cultivar Digu B-lectin receptor kinase (Pid2) gene, complete cds.	Oryza sativa Indica Group	GCCAGGCCGCCTGGTCCTCAAACACGACCGCCGCCTCTGCCTCTTCGGTGGCTCAGCTGCTTGAGTCCGGCAACCTCGTCATCGTGCGCGAGCAGAGCAGCAGCGACGCCTTCCAGTGGCAGTCGTTCGACCACCCGTCGAACACCTTGCTCGCCGGCATGAGGTTCGGCAAGAACCTGAAGACCGGCCTGGAGTGGTCCCTCACGTCGTGGCGGGCGAAGGACGACCCTGCGACGGGGGCCTACCGTCGGGTCATGGACACAAGGGGCCTGCCGGACATCGTCACATGGCAAGGCAGCGCCAAGAAGTACCGCGCCGGCCCGTGGAACGGTCGCTGGTTCAGCGGCGTGCCGGAGATGGATTCACAGAAGTTGTTTTACATCCAGATGGTGGACAGCT…
Seq_111811	Sobic.002G178101	Pto	Lycopersicon pimpinellifolium Rio Grande-PtoR protein kinase mRNA, complete cds.	Solanum pimpinellifolium	AAAAAAAGCCCCTAGGCTTGCCACCCGTTCTTTCCGGCGGTGGGCTGGTCGGCTGGTGGCCTGGTGGGCAATGTTGACGCCATCATGGATATCAAAATCGAGTATGGAGTGAAGAAAAACTGGATGGGTGATCCATGTTTTCCAACCAAATATGCTTGGGACGGTGTGAAATGTAGCAATGCAAGTGGTAACACTTCGAGGATAATATCACTAGATCTCTCCAACAGCTATTTGCATGGCCCATTATCTAAGAATTTTACACTGCTCACAGCACTCGAGAATTTGGATTTATCTTACAACAACTTAAGCGGCTCAATACCTGATTCCCTACCAAGTTTGCCTTCCCTACGAGTTCTAAATGTATCTGGCAACCAGCTGAGTAGTGACTCTGCGTGTAAA…
Seq_112674	Sobic.005G119400	MLA10	Hordeum vulgare MLA10 (Mla10) mRNA, complete cds.	Hordeum vulgare	AACGCCAATGCTTCAGCCCTTAAGCAATTGTAGAGACTTCATGTTACCAATCCCAGGTGGTAGCACCACTGATGGTTCAATATATAGGTGCATCAGTCGTCTTAGTCGAACAACAGTTGAAGGTCACGACAACCTTCTAAGTCCAATACTCGCAAAACTTGGAAGCTTGAAAGAGGAGACATCAGGCTAACAGCACCAGGGAACACAATAAGCGATCTTGCGTGGGACAAATTAATGGTCACCTCTGTTCTGGTGAGCTCTTCATTACTGTCATTGTGGAGGGAAAATCGACGAATCCTCTTTGGAAGGTGTGCAAACTTGAGACCATGTGACTTAATGACAAATTTTTCTTTGGTTGACAATGATGTTATGAGATCAAGCACCATATCATGCACACGG…
Seq_113712	Sobic.010G028600	Serk3A	Nicotiana benthamiana SERK3A (Serk3A) mRNA, complete cds.	Nicotiana benthamiana	ACATCCCAAGAGCCTAACCAAATTTGTGTGTTGGAGTTTTGCTATGAGTTGTACTTCATTTTTGAACTCTATAAAACCTTGTCCTGAATGTGAAGCAAGTCTTTTAACTGCTATCTCAACTCCCTCAGGAAACTGACCCTTATAGACGGGGCCAAACCCACCTTCCCCAAGTTTATTTTCTTCAGAAAAGTTATTTGTGGCCTCCAATATCTGATGAAAGTCAAAAACCGAAAACTCGGAGAGGTCTGCTTCCATTTCCCAATCTGGTTCTCCTCCTCCTCGCAAGCTGATATGAGTAGACTTTCGGCGTAATCTAGGCCTACCTTTTCTGTACCTTCTTCTTCGCCAACGACAGTAAAAGATGAAGCAGAGTGCTACTACTGCTAGAGGAGGTGCTAC…
Seq_113735	Sobic.004G044800	FLS2	Arabidopsis thaliana FLS2 (FLAGELLIN-SENSITIVE 2); ATP binding / kinase/ protein binding / protein serine/threonine kinase/ transmembrane receptor > (FLS2) mRNA, complete cds.	Arabidopsis thaliana	GTATGCGGTATTGAAGTGATGGACCACTATAAACTGTTAGATCAAAGATCCTTGGGTCCAAATCAGCTGCAGTCTTCCCTGAAGTTAGCATTGGCATATTCGTTAATTCTTTTGGAATATCCCCTGTAAGGCTGTTGTTTGATAGGTCTAAATAGAAAAGATAGTTCAGGGTGTTTATCCAGGTTGGTATCGGTCCACTTAGTTGATTGCCTTGCAAAGACAGCACCTCCAATTTTACTATCTTTGATATCCAAAGAGGCACTTTCCCCAACAATAGGCAATTTTCAATGCCCAAAACCTGTAGATTCTCAAAAGCTGCAATGTTGTCATCATCTGGCATGGTCTCATTCGTGAAGTTGAGCCCAATAAGAAGGGTGGTGAGGTTTTTGGAGCTCTTTA…
Seq_114342	Sobic.010G126800	Serk3A	Nicotiana benthamiana SERK3A (Serk3A) mRNA, complete cds.	Nicotiana benthamiana	ATCTTGCAAGACCAAAATCACCTAGACGTCCATTCATCTCGCTATCAAGTAGCACATTGCTTGCTTTGATGTCCCGGTGGATTACTACTTTTTCCCACCTCTCATGCAGATAGAATAGGCCAGATGCAACACCTTTGATGATTTGAAACCTTTGAGCCCAATTCAGAGTGAGCTTATCCTCTTCACAATGTAAATACTTATCAAGACTTCCATTTGACATATAGTCATATACCAAGAGGAGTTCACCTTTCCTTCTACAATAACCAAGTAGCTGGACCAGGTTGCGATGACGGAGACGACCAATACTGAAAATCTCAGCAATAAACTCCTTCATTCCCTGCTTCGATTCATGTGACACCCTCTTTACAGCAACCTCTAATTTTGAGATGGGAAGCACAC…
Seq_114354	Sobic.002G190400	XA1	Oryza sativa mRNA for XA1, complete cds.	Oryza sativa	GACCGTGCTATCCGCTATCCCGCGCCGAGAGCCCCGCCGCCCCAGGGGCTGAGGCGGGGAAAAGCGGCGGGAAAATGCTTTCCCCTTCCCTCCACTACCCCAGAGTAGAGAGTACCGATTTCCCCTGACGGCGCCGGATTTCCTGCTAGTGCTACATTGCAGTGCAGCGGCAGCGATCTCGTCTCTTCCGGGTCAGGTATGGGTCAAGATTGTGATGGTTCCCCCAACTACATCGGTGAAGAAGACAATGGCGAGGAAGATGTGGTGGACTGTGCCAACAATGACATAGGCGATGGAGAAGAGAGCACTGGCAGCATCCCCAGCCCGCTGTTCTCTGGGACAAGGCCGAGTAAAAGGCTCCGGTCGAAGGTGTGGGAAGACTTCATACCCACCTTCGTT…
Seq_115356	Sobic.007G128600	XA1	Oryza sativa mRNA for XA1, complete cds.	Oryza sativa	CAATATCCAAAAAGGATTGCATAATCAGGCATCTCACTGCAAAGGGCGTTCAAGCTGGCAGATTATGGAGTAGTATTCTAACTAAATATGGATCACACATAATTACATATCAACGCACCTTGAGAGTTCTCGTGACTGAACCCACGCTCCTAGAAACCTGCCATCCAGTGCACAAATTCCTTCCCAAGATTCCATCTGACTATCTGAGCATGAAAAGCTCCATGGCAGGTGTGATTCAGAATCACTCTGTAGTGTAGACTAAACAGCAGCACTACGTGAGCATGTTTTTTCGGCCATGTTAACCTACGACTCTTTTGTGTAGTAATGTCAAGCTAGAAGAAACAGCAAACAAGAGTTACAGTGGTTGAGCAAAATCCTGATTTCGAACTCTGCGCCAAC…
Seq_119007	Sobic.007G072000	RPG1	Solanum bulbocastanum putative disease resistant protein RGA2 gene, complete cds.	Solanum bulbocastanum	GGGCAACAGAGACAGTACAGCCTTGAGGGCTCACACAGCGATGGCGGAAGTCGGGGGCATGCTGGCCTCGGCCGTGCTCAGCGTGGTGTTCAAGCAGATCAGCGCCATCATCGAAGGCCAGATCTCGCTGCAGCAGGACTTCACCAAGGACCTCAAGAAAATGAAGATGACCCTAGAGTCTCTGACGGCGGTGCTCAAGGATGCCGAGAGGAAATCGGTGGACAGCAATCACGTGCAGCTGTGGCTGAAGCGGCTCAAGAACGCCATGTATGACATCTCCGACATGCTCGACGAGTTCGAGGCCGACACCCAACCGGCTGCCCGAAAGAAGTCCTTCGGAAAAGGCATCTTGCAACTGGCATCTATTGGTCCCAAGCCTAAACTTGCCAATAAGATGAA…
Seq_119635	Sobic.003G313700	RPG1	Arabidopsis thaliana RPM1 (RESISTANCE TO P. SYRINGAE PV MACULICOLA 1); protein binding (RPM1) mRNA, complete cds.	Arabidopsis thaliana	AAAAACAAAAATATACAGTTGAACCCACGAGAACAAGAAATCAAAAGGCCTCATGTTACAATATGATTGTCTTTGAAGTCCTATAAGCAATGGCCTAAACAGTTACCCATATTGTTGAATGATCTGGATAGATGGGATGTGTTTGACCCTAACAAAATCTTCACTAAGTTCTCCCAATCTATCGGTAAACGAGCTTGGCATGCCCACTAATCTCAGTCTCTGCAAAGTAGCAAGAGACTGCAACCCAGTAGGAACTGTCGCTAGATTTTCACATGACATGATCCACACTTCCAGGACACATGGCATGGCTCCTTCATCGACATCCCATTCCTCCAGCTCCTCAAGTTCAGTTATGATAAATATTTTCAGGTTTGGAAAGCCTGGACAGCAGCATCTCAT…
Seq_122301	Sobic.002G409200	Serk3B	Nicotiana benthamiana SERK3B (Serk3B) mRNA, complete cds.	Nicotiana benthamiana	GCTCAGCATCCTGACGACCTCGTCCATGGCCGGGCGGTCATCCGCGCTCTCCTGCACGCAAAGGAGCGCAACGTGGACGTGCCTCTCCATGGTGTAGTCATACGTTCCGTTCCCTAATAAGCTGCGTTCCACCAGCTCTGGCCATTGCCCGGATCTCCACAGCAGCCATGCATATGCGATTAGCTTGTACAGTTTGCCATCGAATCTGTAGGAGCCAGTGGTCATGGTGCCGCTGATGATCTCCAGGAGCAGCACACCGAAGCTGAAGACGTCAGACTTGACCGAACACACTCCATCCGAGGCATACTCCGGAGCTATGTACCCATGTGTGCCCACAATTCGAGTGGTGTTTGACTCGGCCACGCTAGAGCTGAATATCCTGGCCATCCCAAAGTCTGA…
Seq_122456	Sobic.007G120100	Lr34	Triticum aestivum chromosome 4 clone BAC ABCT5; BAC ABCT33 map 4A, *** SEQUENCING IN PROGRESS ***, 7 ordered pieces.	Triticum aestivum	GGAGCACCTAATGTTCTACGGCCGGATGAAGAATCTCACAGGTGTCGCTCTAACAAAGGCCGTGGAAGAATCCTTGAAGAGTGTAAATCTGTTCCATAGCGGGTTTGGCGACAAATCTGCAAGCACGTATAGCGGTGGCATGAAAAGAAGGCTCAGCGTCGCCATCGCCCTCATAGGCAACCCTAAAGTTGTTTACATGGATGAACTGAGCACCGGACTGGACCCGGCATCAAGGAGATACCTGTGGAACGCCGTTAAGAAAGCAAAGAAAAACTGCACCATTATCCTTACCACGCATTCAATGGAGGAGGCTGAAGAATTGTGTGATCGCGTTGGTATCTTTGTCGATGGTGACTTCCAGTGTCTTGGAACTCCTATTGAGCTGAAGGCGAGGTATGG…
Seq_122656	Sobic.010G242900	RPG1	Solanum bulbocastanum putative disease resistant protein RGA2 gene, complete cds.	Solanum bulbocastanum	CACGTACAAAGCTGCGTAAGCACACGACGTTTGCTATAACACAAATTAATAGTACATTTGCAATAGTTCAACCCACGGAGCAAGTAAATGTGCAACTTACATTACACTTCAAGCCACCTGCTGTAGTCTAGCTTATTCTTTAGACGACGAAGTGCCACTGATATTGTCACGACCACGTAACGAGAAGACCACAAACATATATGCATGGTGCCCGGAAATAGCAACCAACCATGCAGGTAAAAAGCACAATAATTATACTTTTGTCGTGCACGATTAGCTGAGAGCTCACTGCACCCGTGCTACCACTGCTACCACGATTCGGGATCAGCAAGAGCTTTCCGGGTTCTCAACTCTTCCTTTTAAACCCCAACCGTACCCATCAATCCATATTTCAAGGAC…
Seq_123452	Sobic.002G058400	RPG1	Arabidopsis thaliana RPM1 (RESISTANCE TO P. SYRINGAE PV MACULICOLA 1); protein binding (RPM1) mRNA, complete cds.	Arabidopsis thaliana	CGCGGCCGAGTCGCCGACGCGAGGTGAGTTGCTGGTTTAATTTGGGGGGGCTTGGTGCGCCCTGTTCGCTGTTGGTGCGGGAGGTGCTCGCGCTCGTTCTATTGGGAAGCTTAGCAATCTGCAAACGCTGTATCTCAAGGGTTCTGTACTCGAGTTGCCAAGTGAAGTAACTATGTTAACAAAGCTTCAGCACCTAATTATAGATGTTGGAAGGTTTGGAAGTTCAGCAAGTAACAAAATATGTCGCCAGGAACATCTGCAGACGCTGAAATACATAGAAGCCAACAGCTGCGTTGTTAGAAGTCTTGGGTGCTTGACTAGGATGAGAAGCCTTGGCATTAGGAAGGTGCTAGAATCCTACAACACAGATTTGTGGACTTCAGTAAGCAATATGAAAGC…
Seq_124630	Sobic.006G030400	xa21	Oryza sativa Indica Group Xa21 gene for receptor kinase-like protein, complete cds, cultivar:II you 8220.	Oryza sativa	GTTGGCAGGTTCAAGTTTGACACTGACATTGTTGCCATCAAAGTATTCAACTTGAATGAACGCGGTGCGCATGACAGTTACTTAACAGAGTGTGAGGTGCTAAGAATTATACGCCACCGCAATATTCTTAAATCTGTGACTCTGTGCTCAACTTTGGATGCAGAAAATAATGAGTTCAAAGCAATAATCTTTCAGTTCATGGCTAATGGCAGCCTTGAAAGGTGGCTTCATCCTAGTCGACAGGCTGAAAGACCAAAGAGAGCATTAAGCTTGGGACAACGAATATGCATAGTAACAGATGTGGCTTCTGCCCTGGATTATCTCCACAACCAACTGGTACCGCCTTTAGTTCACTGTGATTTGAAGCCAAGCAATGTTCTTTTGGATTATGATATGACT…
Seq_129547	Sobic.003G064901	Pid2	Oryza sativa Indica Group cultivar Digu B-lectin receptor kinase (Pid2) gene, complete cds.	Oryza sativa Indica Group	ATCGACGAACGCGAGGTGGAAGTTGGGCACGTCGCCGGCCAGCTCCGGGATGTTGCTGAAGTACCTGCCGTTCCACGCGCCGGTGGCCCAGTAGGTGACGGACACGGAGGAGCCGCAGAGCTTGAGCACGAGCTGGGGTGCGCCGGGGTCGACCTCGAAGCAGTAGCGACCCGGGGACGGGGTGGCCGAGCTCAACTTGGAGACGAGGCGGGTGCTCACGCCCGTGGCCTTGTTGAGCCCGAGCTTGGCGCTCGGGAGCAGCGTGTCGGTCAGGTGGTCGAAGCTCTGCCACAGCGTGCGGCGAGGCGCCGCCGCGGAGGAGTTGGAGACGTCGAGGAGGACGAGGTTCCCGCTGTCGAGGAGCACGGCGATGGCGGTGGTGGTTGTGTTGGCGGCGGC…
Seq_133332	Sobic.005G182800	Pi-ta	Oryza sativa (japonica cultivar-group) pi-ta protein (Pi-ta) gene, complete cds.	Oryza sativa	GTTATGACCCGGAACATGTATTCAAGATGAAACCTCTCAGTTACCATCACTCTAAAGACCTATTTATCAGAACAGTTTTTGGCTCTGAAAAAGAATGTCCACAACAATTCCATGATGTCTCAGATAAGATTACAAGAACATGTTGTGGTTTGCCACTAGCAATTACCTGCATAGCTTCACTCCTAGCAACCAAACCCCAAATAGTACATCAATGGGAATATGTACAGAACCTTCTCTGTGACGGATTGAGAAGAAACCCAACTTCTGAGGAAATTCTAAAGCAAGTACTGAGTATCTGCTACACTAGTCTTCCCCATACTTTGAAGACATGTCTACTGTACTTTAGTGTATATCCTGAAAACTACTTAATTCTGAAAGATGATTTGGTGAGGCAATGGG…
Seq_137375	Sobic.003G233800	Pid2	Oryza sativa Indica Group cultivar Digu B-lectin receptor kinase (Pid2) gene, complete cds.	Oryza sativa Indica Group	GAGAATGTTGGCCGACTTGATGTCCCTGTGTATGATCCTAGGATGGCAGTCTTCGTGGAGGTACGTCAACCCACGCGCGGCTCCGATCGCAATCTTCATCCGCCTCGACCAATCCATAACGGGTAGCCCTTTTCCTGCAGCGTGCAGGTGATGCTCGAGCGTGTTGTTGGCCACGAACTCGTAGACGAGGAGGCGGTGGTTCTCGGTGACGCAGTAGCCGACGAGCGTGACGAGGTGGCGGTGGTGGATGCGGCTGATGATGTCCACCTCCGCGCGGAACTCCTTCTCCCCCTGGCCGCTGCCCACCTTGAGCTGCT
Seq_138347	Sobic.003G162600	Ve2	Lycopersicon esculentum verticillium wilt disease resistance protein Ve2 (Ve2) gene, complete cds.	Solanum lycopersicum	CTTATCTATACAACTAGTTGGCTCTGCACAACCATTTCCTGGCGCCTCTCCTGCTGCAGACCACCTGCAAAACAATGGCCAGCGCGAAGCCCAGCCCAAAGCCAGAACCAACGAAGAGGCACAGCACGATAACTTGGAACCTGTGGTCAGCAGATTCTCCACCGGACACCTGCAACGGCGGCGGAGCCTTGGTTGCTGACGGTGGACGCGTCAGGTTGCACCGCACGGGAAGTGGGCATCCGTATAGCCCTCGGTTGCCTCCCTGGAAGGAGCTGCTGGGGAACGTCGAGAACTGGGTGCCCGAAGGTATGCTCCCGCTGAGGTCGTTGTAGGAGAGGTTGAGCCACTCGAGGGCCGTCAGCGAGGCCAGCGACTGCGG
Seq_161059	Sobic.001G479700	FLS2	Arabidopsis thaliana FLS2 (FLAGELLIN-SENSITIVE 2); ATP binding / kinase/ protein binding / protein serine/threonine kinase/ transmembrane receptor > (FLS2) mRNA, complete cds.	Arabidopsis thaliana	TACTCCAGCATGATGCAGCTGTCCGGCAAAATGGAGATCCTGCTCACGCCCAACGAGACGTCCCCCGTCGGCCCGCTCATCAACGCCGGAGAGATCTACCAGATTGTCCCGCTCGGCGGCAGGACCGCCACTAGAGATGTGGTTGCAATGGAAGATCTCGCAGCGAGCCTCAAGAACCTACCTCCGGACTGGGCTGGAGACCCTTGCCTGCCACAGCAACACTCTTGGACGGGGGTTGAATGCTCCCAGGGATCACCCATGCGCGTCTTGTCACTGGATCTAAAAAATCATGGTCTTTCAGGATCGCTTCCCGACAGCATTGCAAATTTGACAGGGGTGAAAACCATCTATCTCAGTGGTAACAATCTCTCAGGCCCCATACCTGACTTGAG
Seq_164000	Sobic.001G495850	Bs3	Capsicum annuum cultivar ECW-30R Bs3 (Bs3) gene, complete cds.	Capsicum annuum	GTACTTCCCCATCAACTCCGCGCGGCGTAGGAGCGGAGGTAGCGGAGGAAGTCGTGCTTCGTCGGGTACGTGGGGAAGTCGTCCGGGAAGCGCGCGTGCGGGAGCTCGCAGAACACCTTGGGGAGGTGCAGCCGGAGCCGGTCGTACGTGCGGTTGGTCCACAGGTCGGCGATGCCGTCGGAGCGCTCCAGCACCGTGAAGGGCACCGCGTGCTGGCTCAGCGTCGCCGCCACGGCCAGCCCGGACGGCCCCGCGCCTACGATGATGGGGCCACGCACCAAGCACGCGGCGGCGGCCGA
Seq_166100	Sobic.010G242800	RPG1	Solanum bulbocastanum putative disease resistant protein RGA2 gene, complete cds.	Solanum bulbocastanum	TGCCATCCAAAACATAACAAGAACCTCTCTAAAAAGAACATAGTCCTTTGGGAAAGTGGACAGCGAAGCAAAACATGCTCTTAGATGGGGTGGAAGTGCATCATAACTTAATTTGAGTGCTGGCAACATACCATCTTTATCTTGATCAACGTTCCACAAATTG
Seq_173813	Sobic.009G061900	ER - Erecta	Arabidopsis thaliana ER (ERECTA) (ER) mRNA, complete cds.	Arabidopsis thaliana	GCCTTATCCCGGACACAATAGGCCAGATAGTGCATTTGGAAACTCTTGATCTGTCAAACAATCAGTTCACTGGAAGCATCCCAAGTACGCTGGGTGGTCTGGCTCACCTCCAG
Seq_193505	Sobic.003G197500	Serk3A	Nicotiana benthamiana SERK3A (Serk3A) mRNA, complete cds.	Nicotiana benthamiana	GGCAGACGTGTCCAAGGCCATTCTAGGTTACATCACTGCAAACAAGATCCAGAGCATTGCGCTCGGCGGAGCCAGCAGAAATGCATTCACCAAGAAATTCAAGAACGCGGACGTGCCATCGACCCTGATGAAGTGCGCGCCGGACTACTGCAACATCTACGTCGTCGCCAAGGGCAAGTCCGTCAATGTCAGGCTCGCCAAGTGCGGCGTTCCGCCCATGCACAGTGCCGCCGAAATCCCTTCGGACACCGACTCCCAATCGGGGCTGTACATGCGGCGCGGCTCCAGGGGGCACCTGCCGCCGGTGATGCCTGACGCCACCAGGCGCTCCGTTGACGGACGCACCCTGCCGGAGCTCAACACGCGGCCAGCGTTCCGCGAGCGCTCGCTCCCGTCCTC…
Seq_194607	Sobic.001G353800	Pto	Lycopersicon pimpinellifolium Rio Grande-PtoR protein kinase mRNA, complete cds.	Solanum pimpinellifolium	GATGTTTACAGCTTTGGAGTTGTCCTCCTTGAACTGATTGTTAGAAAAAAGGCAACGACAGTAGTGGACAATGTCAGCCTTGTGCGTGCATTTACTAATGCTCTTGCAAGGGGGGTCAGAGGTGCTAGAGAGATGTTTGACGGTGAAATTGCAAGCAAGAATAGCATGAAGATTGTTGAAGGGTTTGCAAAGATAGCGGGATAATGCCTAGCAATGGAAAGGGACAAACGTCCCGAGATGATTGATGTCGTGGAACGTCTTCGGGTACTAAATAAAGCTTCACATCAGGATCAAGGAGAAAGAGCAGGCCTGTTCTCTTGGGCTAGGAAGAGCAAACCAGTACCTGCAGCTCGTGTGACCACTGTCCCTGCCAAGATTCTCGTTTTGCCGGCACACCTG…
Seq_194946	Sobic.006G246400	Pid2	Oryza sativa Indica Group cultivar Digu B-lectin receptor kinase (Pid2) gene, complete cds.	Oryza sativa Indica Group	GCGCGGGGCACGCCCGGGTACGCCGCGCCCGAGCTGTGGATGCCGCTGCCGGTGACGCACAAGTGCGACGTCTACAGCTACGGGATGCTGCTGTTCGAGACGCTGGGGAGGCGCCGCAACCTGGAGCTCGGGCTGCACGCCCGCGAGAGCCAGGAGTGGTACCCGCGGTGGATGTGGCACCGGTTCGAGGCGGGGGACATGGACGCCGTGGTGGCGCGCGCCGCGGCGCCGGGGGACAAGAAAGATAGGGAGGCGGCGGAGAG
Seq_195433	Sobic.004G103400	Ve1	Lycopersicon esculentum verticillium wilt disease resistance protein (Ve1) gene, complete cds.	Solanum lycopersicum	ATCACTTCGAAGGAGAGTTGCCTTATAATATTAATAGCCAATGTGATCTGCAGACAATAAATATAAATGGAAATAAAATTCAAGGACAGTTGCCGAGGGCTCTTTCTAAATGCACTGATTTGGAGGTTCTTGACGTTGGAAACAATAAAATTGTAGATGTTTTCCCATCTTGGCTTGGCAACCTTTCCAATCTTCGTGTCCTTGTATTAAGATCCAATCAATTCTATGGCACACTAGATGACCCTTTCAGAAGTGGAAAGTTCCAGGGGTACTTCTCGATGATACAAATAATTGATATTGCCTCAAACAATTTCTCTGGCAATGTGAAACCACAATGGTTCAAGATGTTTAAATCTATGATGGAGAAGATGAATAACACTGGACAGATCCTGGATCATT…
Seq_196090	Sobic.002G011600	Lr1	Triticum aestivum Lr1 disease resistance protein (Lr1) gene, complete cds.	Triticum aestivum	TGATTTTGTTATTTTCTTAAGAAATTACCCTCCTATCTTTCGCCAGCCATATAGCACATACCTGTTTATTGGAAACTGCATGTTTGGTCGCCAAGTGGAGATGGAACGGGCCATTAACTTCCTGCTATATGAAGAACATCCTGCTAATGGAAATATTGGCGTTCTACCAATTGTTGGTCCAGGAAAAGTTGGAAAGACTACACTTGTTGAGCATGCCTGTCGTGATGAAAGGGTGCGTGATCACTTTTCTCATGTCATCTTCTTAAGCAATAGTGAATTCAGTGAAGACAATGAGCTGAAAATCAGGGATGGCAGTAGAACCAAACATCAACAAGGTGACTCAAATGAAGAAAAAA
Seq_196335	Sobic.005G131600	EFR	Arabidopsis thaliana EFR (EF-TU RECEPTOR); ATP binding / kinase/ protein serine/threonine kinase (EFR) mRNA, complete cds.	Arabidopsis thaliana	AAACTTCTGGATCTCTTGGCACTTGTATTGTATTCCATGGAGAATGATACGATCGCATACCTTTCCACCTCCATTGTTACCTTTACCCAGCCGAACGGACACAAGCGTCCCTGATGGAGCGCAACTCGGTGGCCGCATCCTTCATGGTGAGCCTCTGGAACGGCACTCCCCGCGTGCAGCTGAGCCCGACCCTCACAGCAGAGACCAGGCAATTGCGTTCCGAGATATGCACACCGCCATCGTCGGAGCCACATGACACTTGGCCATCATCAAACCCTTCGACCGGCAGCAGGGCTGGGTCGATGATCTGCTTGATCTTGTCTGGGAACGACGCGGCGACGAACTCCAGCAGCGTCAGCCCATCCTTGAACACGTCATCTGTCGGTGACCTCCCCGTGA…
Seq_196502	Sobic.003G069601	xa21	Oryza sativa Indica Group Xa21 gene for receptor kinase-like protein, complete cds, cultivar:II you 8220.	Oryza sativa	ATCGCAGTGAGTGATTGGTGGCTCACAGTGATAATGAAGATAATCCAAAGCATCCATGATATTTGTGGCAATGTTTAGTCTTTGTTCTAGGCTTAGAGTATTCCTCGGAGTGAGCAAGTCAGATTTTGGATGAAGCCAATCATTTAAGCTGCCATTTGACATGAACTCAAAAATTAGTGCCTTGAACTCTTGACCTTGGTGGTTAATGCTTGAGCAGCATGTGATGATTTTCACAAGACAACGATGACGCACCCTTCGCAGTGCCTCACATTCTGTCACAAAAGTTCTAGTAGATCCTGGTTGCTGAAGGTTGAAGACTTTCACAGCAGCAATAGTTTCATCATCTGCAAAAGTGCATTTATAGACTGCCCCAAAGCTTCCTTTACCAAGC
Seq_196599	Sobic.010G061300	Xa26	Oryza sativa (japonica cultivar-group) bacterial blight resistance protein XA26 (Xa26) gene, complete cds.	Oryza sativa Japonica Group	GCGTGCAAGTACCTGCAGCAGTTCGTTCTGTCATACAACCGCTTCACCGGTGGAATACCGCTGTGGTTGTCAACCTTGCCGGAGTTGACGTGGATCTCCCTAGGTGGTAACGACCTTTCCGGCGAGATCCCCGCCGTCTTGAGCAACATTACCGGCCTCACCGTACTAGACTTCACCACGAGTAAGCTGCATGGGGAGATCCCACCGGAGCTGGGCCGGTTGGCGCAGCTGCAGTGGCTCAACCTCGAAATGAACAACTTGACAGGTACCATTCCGGCCTCCATCAAGAACATGTCTATGCTCTCCATCCTTGACATATCCTACAACTCCCTGACTGGACCTGTGCCACGAAAAATATTTGGGGAATCTCTTACCGAGCTCTACATCGATGAGAATAAG…
Seq_198049	Sobic.004G023800	Ve1	Lycopersicon esculentum verticillium wilt disease resistance protein (Ve1) gene, complete cds.	Solanum lycopersicum	CCAAATTAAACAAACCTAGGTTCTACACGATTACATACACAAAACAACTAACACTTATTTCGATGTGCTAAGGATAGCATAAACCATACTGTATAATTAGCTACCGTAGAATCTGCAGTACCACCAAGTTATTTGTGCATGACATATTGCACCTCCTTTATAGCAATCGGGCACCTTCAAGTCAACATAGAATCCTGAAAATATGGAACCACCTGCTGATCCAATAATCCAGTTTCAATAGAATAGCTGCTGCAAATCCCACTCCAAAGCCCACACCAACAAAGAGAAACAAAACAACATCGACACCATGAGAGGAGTTTTTCAGATGTGTTTCACTTGGAATATCCGAAGGGCCACATTTTTTGGATAGAGGGGGTCCACAGAGTCCTGCATTGCCAT…
Seq_198151	Sobic.001G332900	Pid2	Oryza sativa Indica Group cultivar Digu B-lectin receptor kinase (Pid2) gene, complete cds.	Oryza sativa Indica Group	GTGGCAGAGCTTCGATTCGCCAACAGACACCCTCCTGCCGACCCAACACATCACTTCAACTACGACGCTGGTTTCCACCACTCATCTGCATGTTCCAGGTCCCTACACATTCCATTTCACGGATTCATCGATACTGTCCCTCATTTATGATGATGCCGGTGTCCATGAAATATATTGGCCAAACCCTGACAACGGAGAGTATCAGAATGACAGGAATCGGTATAACAGTACAAGGCTTGCGTTTATAGATGATACTGGCAGATTTTTTTCAAGTGATTTTGCCAACCAGCAGCCACTTGTTGCCTCTGATGAAGGTGTTGGGATCAAAAGAAGGCTTACTCTGGACCCCGATGGTAATCTCCGACAATACAGCCTGAATGATTCAGATGGCAGATGGTC…
Seq_199582	Sobic.002G088500	I-2	Lycopersicon esculentum disease resistance protein I2 (I2) gene, complete cds.	Solanum lycopersicum	TCGCAATCTGTTGAATTGGCTTCTTGCTGGAGATCACTCGCCCGGACCTCCGCACCTCACAGTTCATCATGTAGCGGTAGTGAGGTGGTATATGTGACGTCCACGCAAGAACACCGAACCTCCCACGAGGTCTAAAATTACTACTACCAAACAAGAGATCTCGAATACGGAATACTCATCTGGGACTGGGAGCCTTCACTCTGATCCGAGTCCTGATCAAAACCTGTTTCATAGTCATGAACAATCACAAGATATTCAGAAGACGTTGTGTTTACTCTCCGGAGAAATACCGGCTCGAAAGCCTGCCAGAGATCAGCGCACTTGTCTCCAAAGAGCGAGAGATTCACCCGCTTGAACTCTTTCACAATCGCAAGAGCCGTGCTCCAGAAATGGGCATTG…
Seq_199803	Sobic.008G178901	RTM2	Arabidopsis thaliana RTM2 (RESTRICTED TEV MOVEMENT 2) (RTM2) mRNA, complete cds.	Arabidopsis thaliana	GTGGCTGCGGCGGTTCAGGATAAGCTGGAACGGGAGGTTGTGGTGCCGATGGAATGCGACGTGGTCGTCGTGGTGGTGACGGTGGTGAAGGCGGCGGCGGCGGCTGCTGTACCAGCGGAAGTGTCGGCGGCTCAGGGTACGCAGGAGGCCAGCGAGGCTCTGGCGGCGACGGAGTCGGCGGCGGTGGCGATGGCGTGGCGGCGACGAAGGGGAGCGTGATGATGAGCTTCTCGCCCTCGAACCTGGCGCGGACGCCGTCGGCGTCGCAGTTGTCGGGGAGGCGGAGGTCCTTCTTGAACCTGGCCCAGCGGCCGCCCCTGGTGGGGCGCTCGCCGGTGGCGCGGAGCACGCCGTGGTTGTCCACCTGCACCCTCACCTGGTCCTTGCGGAACCCCGGCA…
Seq_199914	Sobic.005G076400	RPG1	Solanum bulbocastanum putative disease resistant protein RGA2 gene, complete cds.	Solanum bulbocastanum	ATTGCTAGCGGCACCCCACCACATTTATTCACAATCTCTTTTCCAACCTGTATAAACTCAGACTCCAAATCATCCTCCACCAACCCAGAATTCTCTAGAAACAAGGTCCAACTCTCGACCTCTGACAAGAAAGCCAGGTTGAATATACTCCTAGATTTTGTTGCTTCTGCAACCTTTTGATCACGAGTAGTTAGCAGAATCTTGCTTCCAGGTGCTCCACAGTTCACAAGAACCATGAATTGTTCCCAGTCAAGCCGGTCATCATGCCAAGCATCATCCAGGACAAGAAGAAATTTCTTGCCTCTCAATTTGCTTGAAATTGCACGGACCATGTGCTGTTGGGCATGGAGATCTGATTTTTGCTCAAGGATAGTTTCAAAAAGCTTCCCGATAAGCTCT…
Seq_200029	Sobic.007G185000	LeEIX2	Lycopersicon esculentum EIX receptor 2 (Eix2) gene, complete cds.	Solanum lycopersicum	GGGCCACAATTTCCAACCTGGCTGCAATCGCAAACTAGAATCGAGATGATTGATCTAGGCAGTGTAGGCATCAGTGGTTTGTTACCTGAGTGGATCTGGAACTTCTCTTCAACAATTACTAGCTTAAATGTATCATCAAACAACATAAGTGGAAAGTTGCCGGCAAGTATGGCACATTTGAAAATGCTAACTCTGATTATGAGGCACAATCAACTTGAGGGAAGCATTCCTGATTTGCCGACTGGTCTTCAAGTGTTGGATTTATCCCACAACTACTTGTCTGGATCATTGCCACAGAGCTTTAGGGACAATGCATTGTATTACTTGCTTCTCTCAAACAATTTTCTTAGTGGAGTAATCCCAACAGATCTATGCAACATGGTATGGATGGACGTAATT…
Seq_200763	Sobic.005G057600	EFR	Arabidopsis thaliana EFR (EF-TU RECEPTOR); ATP binding / kinase/ protein serine/threonine kinase (EFR) mRNA, complete cds.	Arabidopsis thaliana	CTCTGACATGTATAGATACTGGAGGTGACTGGTAAGGTTGCCTAATGAAGGTGGTACATGCCCCTGAAGGCGATTCCTGGTCACTGAGAAATCGATCAGCTCAGTGCAGTTAGCCAAGCTGTTCAGAAACACCCAGTCTTGTTTGCTCTCTGCCTGCAGCTGATTGTATTCAAGGTTCAGCATTTCCAACCTTTTCAGTCTGCCAATTGTGCTCGGCACCACCCCACTGAAACTGTTCCTGGACAGCTCAATGTAGTACAGACCGGAAGCATTCGTCAACGAAGGCGGAATATGGCCATGAAAGAAGTTGACGGGCAGCTCAAGCAACAGGAGGTTGCGCAGCGCACTACCAAGGTCAGCTGGCACCTCTCCACTGAGCTGATTCAGACCAAGGCTGAG…
Seq_201129	Sobic.004G214800	EFR	Arabidopsis thaliana EFR (EF-TU RECEPTOR); ATP binding / kinase/ protein serine/threonine kinase (EFR) mRNA, complete cds.	Arabidopsis thaliana	GAAGGTCAGGTTTCCAAGAGAGGAGCTGATTTGGCCAACCAAGCTTTGGCCGGTGAGGTTGAGCTCCGTGACGCGATATGGTCGCGTGGAGCTGCAGTTCACACCATGCCAATGGCAGAAGTGGATGCTGGTGTTCCAATTGCTCAAGGCTCCATGCGGATCGCTGGTGATGCCGTTCTTGAACTCTAGCAATGAGAGCAAATCCGTTCTGTTGCCATGGATTGACGAACAACAGGTGTTGCCAACTCCCAAACACAGCAGCAACAATGGTAACAGTATATGCATGCCCAGTTCCGCCATTTGCCTTATCATATCTGCAAGGCATATTATAGCATAATTGCTTTACTAATGAACATCGACAACCACGAGCACGAAGAATTTCAACCGGGAGAAAAACGA…
Seq_201432	Sobic.001G074900	Serk3B	Nicotiana benthamiana SERK3B (Serk3B) mRNA, complete cds.	Nicotiana benthamiana	CATGCAGGTGTGGGTGGACTACGATGGCCCGAGCACGGAGCTGAACGTGACGCTAGCACCCCTGCGGGTGCCGAAGCCCAAGAAGCCTCTGCTCTCCCGTGCCGTCGACCTCTCGACGGTGATCACGGACACGTCGTACGTCGGCTTTGCCTCCTCCCTGGGCTCCATGTCGTCGCGGCACTGCATCCTTGGCTGGAGCTTTTCCTTGAACGGATCATCAGCTCCTCCACTCGACTACTCCAAGCTGCCGATGTCGCCGGTAGCTGGTGGCGGAGGTGGTCGGTCAAACACGGTCCTCGAGGCAGCGCTGCCAATCGCCGTCGTGGCGTTCGTCCTCGCCGCGGTCACCAGCGTGTTTGTGTTCGGTTGGAGAAGGGTCAAGTACGCCGAGCTTCGTGA…
Seq_202650	Sobic.008G061500	FLS2	Arabidopsis thaliana FLS2 (FLAGELLIN-SENSITIVE 2); ATP binding / kinase/ protein binding / protein serine/threonine kinase/ transmembrane receptor > (FLS2) mRNA, complete cds.	Arabidopsis thaliana	CACACGAAGTCAGGGCCCGGGGCTTTCGCAGGGAGAGTTTTGGCCTGGGCGGGGCCTTTCTAGCATGGGCTTCTGGTACTACCAGAAATGGGCTAGAAGATCAAAGTCCTCAAGCACTCGTTCAAAATTCTCAAGGGCTCCATAAATTTCTAGCAACAAACTGGAACTAATTTTCTCAATAATACTCAAGGAAACCACGATCTTTATATTAAAGAGAATTAAACTTAGTTTGTTATACACAAGAACAACCTTCACTAACGCTTTGACGTAGCGTAGGCAGGAACTGACGTTGTTGCAGAGGACTCCCTTTACATAGACCATTGGTTTGCATTGCATCATCTACAATTCCTAATCTGACTGACAAAAATAGTGCCCTGAATTTTGAACAGGATCTGTTTC…
Seq_202725	Sobic.007G111200	Pid2	Oryza sativa Indica Group cultivar Digu B-lectin receptor kinase (Pid2) gene, complete cds.	Oryza sativa Indica Group	CGAAGCTGTACACGTCGGCCTTCTCCAGCAGGTCGCTGCCGTGCTCGCAGGGCCCGCCGCCGCACTCCGGCGCAACGTAGCACACCGTGCCGCGCATGCTCGTCGTGCTGCTAAGCTCCCGGCTGAGGTAGTCCCCGCCGCATCCGCTGTGGACGTCGCTGCCCACTGACCGACCGCGCCGCCGGCTCCGCTTCCGGCTTCTCCGGAAGCTGAGGTCCACGGCGCTCGGCTCGACATTATTGCTCTCGCCGTTGGTGTTGCCGTGGCCCGTGTTCATGCTGATCGAACGGAGCCATGGCTTGCCGCTGCCGCCGCGCCGTTTGTCGAAGCTTGCTCCCTGCTTCTTGCTCATCTCTTCAAAGAACTCCTCTTTCCACCACTCCCTCATCTTGGTCACCT…
Seq_204109	Sobic.006G014800	Lr34	Triticum aestivum chromosome 4 clone BAC ABCT5; BAC ABCT33 map 4A, *** SEQUENCING IN PROGRESS ***, 7 ordered pieces.	Triticum aestivum	CTTTATTCAATCCTTGGTCCGAGTAATATTCCTGAAAATTTCTATGGACATACAATGATATAATCAACTTCCGTATATTCCTAAATAAATACTCTTTGTTGTAGAAAAAGAATTGATCACCATCATAACCATAACTATATATAACGTCTGAGATCCTTGAAATCAGAGTACGTCTCTCCTATGCGAATGCCTGCGCTTCCGCCTCTGCCTTAACCATGGCGGCGTACAAGCCGTCGCCATGGGTCGCCAGGAGCTCCTGGTGGCTGCCGAACTCGGCGACCCTCCCGTTGGTGACCACGGCGATGCGGTCGGCCTCGCGGATCGTGGACAGGCGGTGCGCCACCACGATCGTCGTCGCACGCCGTGACACTTTCCTCAGGGCCTCCTGCACGTGCTTCT…
Seq_204950	Sobic.005G133200	RPG1	Glycine max NB-LRR type disease resistance protein Rps1-k-1 (Rps1-k-1) and NB-LRR type disease resistance protein Rps1-k-2 (Rps1-k-2) genes, complete cds.	Glycine max	GGTGACTACTAGGAGTAAAGAGGTAGCACAACTTGTGCAGACCGTTCCTCACTTTGAGCTTGGCTCGTTACCTGAAGATCACTGCTGGCAGTTGTTCCAATGCTATGCTTTTGGCCTTAGAAACATCCATGAAGAGTCCACTTTGGTTCAGGTAGGTAGGAAAATTATGCAAAAGTGTAGCGGCTTACCATTGGCTATTAAATCGATAGGTTGCCTGCTGCGGTCCAAGATGGATATGCAGACTTGGATGGAAATATCCAATAGTGAGTTTTGGGAATATTCAGATAATAATGAGGAGATCTTGTCTGCTCTTAGATTGAGCTTTCATCAACTGCCAGGAAGGCTCAAACCTTGTTTCCTGCTGTGTGCCTTATATCCGAAAGGTGAGCCTTTTACCAA…
Seq_204999	Sobic.008G052500	Xa26	Oryza sativa (japonica cultivar-group) bacterial blight resistance protein XA26 (Xa26) gene, complete cds.	Oryza sativa Japonica Group	GGTCTTGACTTTAGAATTAATCCACGCATCTATATATAAGAGAAAGAATATAACTAAAAATTTAAACTTAATCCATTTCTAATCAATTCAGCACCTTTTCTCCAGTCTAGCATCATCTTATTTGTTGCTTTTCTGGGTCTACCATTGTGTCCATATTATTCTTACGTGCACGTATACAAGTGAGGCGATCATTCATTAGAATCATGTGCATCTTGTGTCGATTTGATATAATCCATTCTGATCTTCTTCAGTGTCACCACCACATTGCTCATTGTCGTTCTGTGCTCAGGCGACTCAGACGAGCAGAGCAAGCCCAATTGAAACACTGTCACAAGAAAGCCATCCAGGTTACTGGAACAAGAAGAGCCATCATGACCATGTAGTAGGCCATCATCCACC…
Seq_205213	Sobic.005G133166	Pl8	Helianthus annuus clone Ha-NTIR11g CC-NBS-LRR gene, complete cds.	Helianthus annuus	GACCGATGGATCCAAAGACAGTTGTGTTTACATTGCCGCGTCGATCGTGGAGGAAACATTCGCTGCTCGTGATTCATGAATGGCGAGCGGCGTGGTGGCGTCTTTACTGTCGTCGGCGACCAAGCTGCTCGACCTCCTGCACGGCGCGCCGGCTGTTTCTCGCCGTGAAGGGCGGCAAACAGTTTCCGCGGAGGTGCATCGGTTGCAGCGGCTGCTGAGGAGGATCCAGGCCACGCTCGACGATGCTGGGGAGAGGGAGATCCGCGATAGGTCTGTGAAGCTATGGGTTGCGGAGATCACCGTCGTCGCCCGCGACGCGGAGGACCTCCTGGAAGACTACCGTTACGAGCTGATCCGGCTGCGCGTGCAAGAACTCCATGGCACCGGCGGCGGCGCTGC…
Seq_205322	Sobic.006G230100	Serk3A	Nicotiana benthamiana SERK3A (Serk3A) mRNA, complete cds.	Nicotiana benthamiana	CGCTGCAGACTTGCAAACAAGTCGATGATTGACTGACATGCATGTAAACGGGAAAAGAACCGCTGATTTGCTGTTGCAACTGCAACTGTGCAATGCTACCAATCGTGTAGCAGTAATCACTAACCAATACGGTGATGGGATCCAAGTCTGAGATCAGAAATTGGCAACCGCGTGCAGGGTTGCTGTTTGGCGCCCTTTCTGTGTCAGATCGGACCTGGACTTGCTGCGTCGTCTACGTGAGATAGGAGTCGGCGCGTGCGCCAGACGCGTCGCGCGTCGCGAGAGGAGACGCGGCGGCACTGCTGTCCGGACGACGGACCTGCGACGAGCTGCTGCTGCCGTTCGTCGTCAGCATCGCGACTACTTCAGCCATGGATGGCCTGTCGGCAGGCGACCGCT…
Seq_205403	Sobic.010G137300	Serk3A	Nicotiana benthamiana SERK3A (Serk3A) mRNA, complete cds.	Nicotiana benthamiana	ATGGCCAAGATCTTCGAGGAGGAGTCAGGTGGTGGCATCAACATGGGATGCGTCGTTGGAACCTATGGGTACATGGCGCCCGAGCTCGCGTTGGAGGGCGTATTCTCAGTGAAGTCTGACGTCTTCAGCTTCGGAGTGCTCCTCCTAGAGATCCTAAGCGGGCAGAGGAATGGTGCACTATACTTTGAGGAGCACGACCAGTCACTCATCCGAGGCGCATGGAAGCTGTGGATCCAAGACGATGCGGCCGAGTTCATGGACCCTTCTCTTGGCCGATCCTACTCAAGGGAGGAGGCGTGGCGGTGCTACCATGTCGGCTTGCTCTGCGTGCAGGGAAACCCCGACGTCCGTCCCACCATGTCTAGTGTCCTCCTCATGCTCATCAGCGACCATATGGAG…
Seq_207092	Sobic.010G213900	Serk3B	Nicotiana benthamiana SERK3B (Serk3B) mRNA, complete cds.	Nicotiana benthamiana	GGCCTTGATGTCCCGGTGGATGATGTGCGGCGTCACCTCGTGGTGCAGGTACACGAGGCCTTCGGCGGAGCCGACGGCGACCGCGACGCGCCGCTTCCAGTCGAGCTGCACCTCGCCGGCGAACTGGCCGTGGAGGTGGGAGAGCAGGCTCAGGTTGGGCATGTAGTCGTAGACGATCATGCGCTGCTCGGCGCCCGCGCAGTAGCCGCGCAGGCCCAGGAGGTTCCGGTGGCGCACGCGGGCGAGGACCTCTACTTCCACCGCGAACTCCATCTCCGCCTTGGAGTTGTTGGTGGCCTTGAGCTTCTTCACGGCGATCTGGAGGCCGTCGGATGTCTTGCCCCAGTAGACGCTGCCGAAGCCGCCCT
Seq_207152	Sobic.002G326300	Serk3B	Nicotiana benthamiana SERK3B (Serk3B) mRNA, complete cds.	Nicotiana benthamiana	GCAAAAATGTGAAAATGTATGTTGTGTTAATAAATATACATAACAGTCAAACTTACTCATATGGCTATATTGGTGCAAATATTTTCCTCTTGATGCAGATAATTACAAGCGTTTTTCTCAGAATTGATGACAATGTGCTTCTACCTTTCTAGCGTGATACTCATAGTCATAGTAATGCCCCGTGATGAAACTTCTTCCTCACTAGGATTTACATGGAAGTAGGCTGGCTGCATAGGCTTTGGTAAGCTCACATCCTTGTTGTTTAGCATTGTGACAACTCGCTCCATATCAGGTCGATGCTCTGCGCTTTCTTGAACACATAAGAGTGCCACATGAATGTGCCTTTCTATCTCTTTGTGTACATTGCCTGGAGGAGAATAAATCAGGTCACCTAATTTT…
Seq_207668	Sobic.002G424800	Serk3A	Nicotiana benthamiana SERK3A (Serk3A) mRNA, complete cds.	Nicotiana benthamiana	CTTTACATCAGCTGCTGGTCGTTTCGTTGATCTATTTAGAGCACTGACAAGTACAGACAGGACCGGAGGAAATTGTAGCAGCTACTAGTATCATCAGGATATAATGGGGAACTGCTGCACAGGCTCTGCAAAGTGCGCCAATGCCTCCACTCCATTTGAATCAAAGGTCACAAGCAGGAGCACCGCGTCCAATAACAGTAACTCGACGACGACCGCCAATAAGCTAGCGTCGCGCCGCAGCATCGGCAGCTCGTCGGCCTTGTCCGGGCAGCTAGCGGGCTCCGACGTGCAGGTGCAGGCGGCGAGCGCCGGGACCGGGGCCGGGGTTGGGCTCAAGTCGTTCAGCATGAGCGAGCTGCGGGCGGCGACCAAGAACTTCGGGTCCACGTCGTACCTGGG…
Seq_208112	Sobic.005G097500	I-3	Lycopersicon esculentum disease resistance protein I2 (I2) gene, complete cds.	Solanum lycopersicum	GAGGGCTTGTACCGTGCATATTATTTGCTCGACCATCGTCATGACGGTTCCTTGCTGGTGAGCAGCTCCTGGTCATTCTCCTTGTCTCGTTCCTCTCGGCCGGCCAAGCGACTTTGCACTTCCAATGCTCGTAAACCCGTATGTGCAGCCGATGCCGACGGAGTTGAGGAATTGAGTGCCACGCTCCTAAGATTGGAAGAGTGTGCAGAAGGGATGAAGGAATTCATTCTACTTCTTACATGCTGCCCTACTATACCCCGGCGGCCTGCTGTCTCCAGCTTTCAATCTGACGACAGATACATGTTTGGCCGTCTTGTTGAGCGGGAGCAGATAATCAGCTTTCTGCTGCAGCCTGAGAGCAGCACCTTGGGCGTCCTTCCACTTGTCGGTGGCCCGGAG…
Seq_208381	Sobic.006G260200	Cf-5	Lycopersicon esculentum disease resistance protein (Cf-5) gene, complete cds.	Solanum lycopersicum var. cerasiforme	CTACAATGCAGCACAGTGATTCTGCCGCCGCCGATTCTGGGCAACTAAACACGGCGTTAGTGGAAAAACTGAAGGCAGCGACTACTGACTCCCACGATATTGACAGTAGTGAGCAACTGGGCACTACAGCATTGACAGACAGGTTACATAGTATACTTTGACGGCGCGCCGGTCACGAATTCACGAACAACGACCTAAACTGGCACACGTACACTTGACTTTAAGTAAGCGGCGGTTATTTTTGAACCCCAGCGTCACGACAACACCACACCACACCACACCACGAAACGAGCAGCGGTGGAACTTATTTCTCCCCAAAATGCTGGCCCAGCAGCGCACACGTACACCGACCGTACCCCCATGGATATGGATCAGTTCCCACCACCTTGGCCGTGGTGA…
Seq_208387	Sobic.004G015500	xa21	Oryza sativa Indica Group Xa21 gene for receptor kinase-like protein, complete cds, cultivar:II you 8220.	Oryza sativa	AAAGACAGCAATGCCGCAATATTTTCAATTACCTGGTGCAATATAACCTATGGAGCCTCTGATTCCAATTGAGCTTTGTGAATTTTGCATAGTTTTTACTATTGTACTTAAAGGTAGGATTCTTGATATGCCAAAATCGCCAATCTTAGCTGTCATGTCTTCTGCGAGAAGAATATTGCTTGGCTTCAGGTCGCAATGGATGATTGGTGGCTGGCTGTGGTTGTGAAGATAGTCAAGTGCATCGAAGATATCAGCAGCTATGCAAAGTCTTTGTGAAAGACTGAGGGTATTTTCTGGAGTGGGATTACTCGACTGCAGATTGATCCAATCATCTAAGCTACCATTGGGCATGAACTCAAAAACTAACGCCTTGAACTCTTCACCTTGTGGATCAACACT…
Seq_208733	Sobic.003G336900	Serk3B	Nicotiana benthamiana SERK3B (Serk3B) mRNA, complete cds.	Nicotiana benthamiana	CAGGAATAGAAGGGAAATTCAATTCATTGATCACGCTTCAGAGATTATGTCAAATTACAGAGCAACACTATCCTATGAAAATCAGAAGAGCTACTGATTTAACTGAACAATACAATGGCATGGATTGTCAATCAGACCGCTACAATCAAAAGAAAAAAAAAATGCACAACAGATTTACTGGAAACGATCGGGAATGCAGGTGGCTATCAACTTTGCTGAAGCTCTATAAGCAATTCACTATGCAACCTAGCTACCATCTCTTGCTAAACTATGCTGTACCCCCTCATGGTGCTTGTGCAGTCTCTGGTTTGTCCTCAAGGGGCGTCCTCGTCCCAGAAGAGTAAGAATTCCGGATCTCCGTGATCCTCCTGATCACCTCCTCCATCTTAGGCCGCTGTT…
Seq_208966	Sobic.002G166150	RFO1	Arabidopsis thaliana RFO1 (RESISTANCE TO FUSARIUM OXYSPORUM 1); kinase (RFO1) mRNA, complete cds.	Arabidopsis thaliana	GCCGCCCGCTCTTCCTTTATATAAGCTAGCTATACTAGTGGCAAACAGTCAGGATAGCTAGCGATACTGCCTCTCATTAATAATGGCCCTCCGTAAGTGTGGTGATCACCCCGCCCGCTACGTGAACGCCATGATTCTTCTGCACTTGTTTGGCGTTCTGGCGTCTACGACGCTGGGGGCGGAGGCTTCCGATGTTGCGGCGGGAAGGCAGCAACGAATTGGTGGCAACGGAGAAAGGGCGGCGCCGTCTATCACTATCGTCCCCGCCGCCGGTTGCCCTAGCCGATGCGGCGATCTAACCTTCGACTTCCCCTTCGGTATCGGCCCCAACTGCTCTCGCAGCTCCGACTTCGAGCTCACCTGTAATGACACCACTCAGCCTCCTAAGCTCTTCATGCG…
Seq_209738	Sobic.009G117100	RFO1	Arabidopsis thaliana RFO1 (RESISTANCE TO FUSARIUM OXYSPORUM 1); kinase (RFO1) mRNA, complete cds.	Arabidopsis thaliana	TTTTTTTAGGAAAAACTTGGCACAAGTTAGCCCTTTCAGAGATTAAAACACCGAAGGCCAAGAACAATCTGCAAATACATTTAAGGACAGTGAACAATCTAAAAAAATTACATACAATTCTTCTCCCATGCAACGAAAAGAAGAAGAAAAAGAGAGATACATACAGCTCTATTTCTTCTCACTCCTACCAAACTATATCAACCATGACAAGCTTAAAAAATAACCATACATGGCATTTCACAGCAATGCAGAGCCTGGACAGCTTGGCAGAAACAACAGCTGTTGTTAGGCTCTTACACGCAATCATCATGTCATCAAATAGCAGACATGAAATCAGTCCCACGTCGCTTCATGACGTGAACAATTGGCTCCCGAGTGTGACAATGGCTGTTCCGTCGC…
Seq_210334	Sobic.003G385000	Pid2	Oryza sativa Indica Group cultivar Digu B-lectin receptor kinase (Pid2) gene, complete cds.	Oryza sativa Indica Group	AAACGCGCCAAAAGATCCCAAGTCACCCGCGTTATAAGCGTAACTAACTTTAGCTTTCCTTCGCCGCCCGGGAAGCGAGAGGCCTTTCCGCTCTTCACTCTCCTCCTCTCGCCGTCTCCTCTTTCTTCTCTTCTCCTCTCCTCGCTCGCGAGGCCCAAGCTTACCGCCAAGGTCTCGATCTCCGCGGGGCTCTCCGTCGCACTTTCTCGTGCCTCGGGGACCCCGATCCGCCATCGAGATCCCGGCCCGTTCCCGGATGCACTGATCAACCGTACCTGAAGAGACTGCTTCGGACGACATGGCGGCGAACGGCATGAAGGTGGCGCTGCACCGGCAGGTCTCCGGGGGCTCGATGAAGCACAACTCGGAGCTCCGGCGGCAGGCGTCGCTCGAGTCCCC…
Seq_210645	Sobic.001G156600	Serk3A	Nicotiana benthamiana SERK3A (Serk3A) mRNA, complete cds.	Nicotiana benthamiana	GGAGATGTACTCCTTCCTCCCCTGTTTGGAGCTCTTTGACACTCTTTTTATGGCGACGTGAAGGTCCATCTCTTTTAAGTACCCTTTGTATACTGACCCGAAGCCCCCTTCGCCGAGCTTCTCCTTTTCGGAGAAGAAGCTGGTTGCCATGGCCAGCTCGCTGTACCGGAAAGGCCTCGGCCCCGTTCCCTTCTCAAACGATTCGTCATCCAAAGGTTCGTCGTCAAACACGTCTAGTTGGCGCTCTCTTGCCTTTCGTCTCCGGCGCCGACGCAGCAGGAAGAAAATAATGGCTCCGGAGCAGATGGCAAACGCCACGGAACCGACAGTCACGCCGGCCACCAGTGCCACCGTCGTCGGTCCTGGGGGAGGCGATGGATCCGGTGGTCGCACTTGCAC…
Seq_210927	Sobic.008G119501	Cf-2	Lycopersicon pimpinellifolium leucine rich repeat protein Cf-2.1 gene, complete cds.	Solanum pimpinellifolium	GAAGAAGTTGTGCGCGAAGCTGAAGTTGGCTAGAGCCGGGAGCTTGCAGACGCGCTCTGCCACGGCGCCGGCGAGCTGGTTCCGTGACACGTCGAGCTGCTCCAACCTGGTCATGTTGACAAGCCCCTCCGGCAGCGTGCCAATGAGCGCGTTCCCGCTGACGTCCACCACCGTGGAGTTGATGAGCTCGGCGAGCTCAGGCGGGATGCAGCCGTCGAGGCGGTTGTTGAGAAGCATGAGCTGGTCGAGCGTGTCGGCCATGCGGCCGATGCTGCGAGGGATGCATCCGACGAAGGCGTTGTTCGCGAGCACCACCACGGTGGCCGTCGAGTTGCCGAAGTTCTCCGGGATGAAGCCGACGAAGCGGTTGCTGTTGACGAAGATGGCGTCGAGGTCCTT…
Seq_211540	Sobic.009G026700	Pikm2-TS	Oryza sativa Japonica Group Pikm2-TS mRNA for NBS-LRR class disease resistance protein, complete cds.	Oryza sativa Japonica Group	TGCTGGCCTCTACCATGATACAGTCCTCAAGATTACTAAACAGCAGAAGGATCAAGAGAACTACGACCCCCAGATTTTTCGCAACATCCTGGAGCTGTGTGCGCCATATGAATCCTGCATGAAGATCTTCACTCATGCTCTGTATGCCAAGCCCAAGAGGAGCAACAAAGAACTGCACGAGCTATACAGCGTCCTAAAGGCTGTTTCCCCAAGGTCATTTCTGGGTATTGCTAAGAAGATGTTCAAGTTCTCATACAACGATCTGCCCAAAGAGTATAAGACCTGCTTGCTCTACCTAGCTATCTTTCCTCAAGGTCACACCATCAGGCGGTCAACCCTGATAGGACGGTGGGTTGCAGAAGGTCTGATAACTAATGAAGACTGGCCCACTTCGGTGCG…
Seq_211614	Sobic.001G167701	LeEIX3	Lycopersicon esculentum EIX receptor 2 (Eix2) gene, complete cds.	Solanum lycopersicum	AGTCAGGAGGAGATCAACTAACAGGTGAAACTTGCAACACCTGAAATTTATGGATCTGTCAAGAAATGCCTTTGTTGGCAAACTTCCAACTGCAAGGAACCTTATCTCTTCTCTTGAATGGCTGAACCTGGCAAAAAACAATTTTCATGGAGAGTTTCCGTCTGTCATACAGAAATGTGAGAACCTAGCCACACTCGACCTTGAGGGAAATAGATATGACAGCATAATTCCTTCATGGTTAGGTGTGAAAAATCCATGGCGAAGGATTCTCCAATTAAGGTCAAATATGTTTTATGGGAATATTCCAAGGAAGTTATCACAACTTGCTTATCTCCAGCTTCTTGACTTAGCTGACAACAACCTCACTGGTTCTATACCAACTGAGTTTGCCAACTTGAA…
Seq_211725	Sobic.010G067200	xa21	Oryza sativa Indica Group Xa21 gene for receptor kinase-like protein, complete cds, cultivar:II you 8220.	Oryza sativa	CCGGAGCTCGGCATGCTGTCCCAGCTCCTGGGACTGAGACTTAGCTACAACAGTCTCACCGGTAGCATCCCGGAGGCTGTCGTCTGCAACTGCACCTCCTTGACCTCCATTGCCTTGAGCAACAACTCCCTCACCGGCGAGATCCCTTTCTCTGCACGATGCCGGCTTCCGCATCTACAGCACCTCAGCCTCTACAAAAACAGGCTCGAAGGCGGCATCCCCTTGTCCATGTCCAACTTCACCAGCCTTAGCTGGGTGTTGCTGCATTACAATCACCTTGGCGGTGTGCTGCCATCCCAAATGTTCGACAAGATGCCGTTCCTCCAGTATCTCTACCTGTCCGGCAACAGCTTCTCAAGTGACGGTGGGAACACCGACCTTGAGCCTTTCCTTGCCTCT…
Seq_211832	Sobic.005G061500	RPG1	Hordeum vulgare subsp. vulgare RPG1 (Rpg1) gene, Rpg1-Swiss Hv 489 allele, complete cds.	Hordeum vulgare	CTCTGTTGCGCCAGCTCCGATCGATTTATTCATCACACTCATGCGTCACCATTGCAGCTCCCTCCGCTTTCCCGCTGCAACCCCTTGCTTCATGCTCTCACCTCTCCGTCGCGCTCAAGGGAATTCTTCAAAATGGGAAGGCAATTGCTGTGAAGAAGCTTTCGGAGATGCAGCTAGAAGATGGTCCATTTCAGAATGAAGTTATTTATCTAATTGGGTTGAAGCACAAGAATATTGTAAAACTTGTAGGCTATTGTGCTGAATACATGGCACCAGAATACTTAACAAATGGATTCATATCCACCAAGTCAGATATATTCAGTTTGGGCATTATAATTATAGAGCTAATGACGGGATCTAGGGACTATCCCCCTAGTAGTGAAGCATCATTTGAGCGGT…
Seq_212209	Sobic.010G234200	Pid2	Oryza sativa Indica Group cultivar Digu B-lectin receptor kinase (Pid2) gene, complete cds.	Oryza sativa Indica Group	ATCAACGGATAGGTAGGGACCAGATGAGTTCACTCCCAACTCGATCATCAGTACGTACACACGCAGTTGCTCTCCCCTCCATCGTCTATCTCACCGATGCCTTCAACAGCGCTACTACTTGTCATGATCGTGGCCATCATCGGCAGTGCACGGTGCTTCGCATCGGACACCATCACCGCCAACTCCGCCATCACCGGCGGCCGGACCGTCGTGTCCAGAGGCGGCAGCTTCGAGCTGGGCTTCTTCCGTCCAGCAGCAGCAGGTGGTGACAGCAACACGGCCTCCTCTCACAACTACTACGTGGGAATCTGGTACAAGAAAGCCGTGACGCCGTGCACGCCCGTGTGGGTTGCGAACAGAGCCGCGCCGGTCTCCGACCCCGCGTCCTCTCAGCTCGCC…
Seq_212327	Sobic.006G008900	Pto	Lycopersicon pimpinellifolium Rio Grande-PtoR protein kinase mRNA, complete cds.	Solanum pimpinellifolium	GATACTAGCCCGTCTGCACGCTCGGCGCGGCGCACCAGGGATCTGTGCCAGCAGCTGGCGAAGAAGGTGGAGATCGTCAGTGGCCTGCTCGAGGAGCTCAACGTCCCGGAGCTGCGGCGGCACCGCAAGACGCGGCGGCCGCTGGACGAGCTGCGCTCAGCGCTCTTCCGTGGGTACGTGCTCGTGTGGTCCTGCAGCCAGCAACAACAGGGCGCGAGCCAGTTCTGGCAGATGTTCATGGCCGCCGACATGGCAGCCATGCTTCGGCAGGCCAAAGACGAGATCGACAGCTACATCATCCTCATCCCCTTGATAACCGCCGTCGCGTCCATTAGAGCACGGGACAGCGAGACCAATGAGGCAGCCCCAGCCCGAAGAAGGACTCAGTTATCCATTCAA…
Seq_212351	Sobic.002G334800	Pid2	Oryza sativa Indica Group cultivar Digu B-lectin receptor kinase (Pid2) gene, complete cds.	Oryza sativa Indica Group	AGTAATTGCTCTTGCACTGCATATGCACATAAACAGGATTGCAATATCTGGAATAGTGAACTCTGGGATCTTAAACAATTACCTAATGGTAATACTGATGGTTTAGATATGTATATACGTCTTGCAGCATCTGATCCTGTAGTTCAAGATAGTGAAAAGAAGGTACACCATGTGAGGCTTATTGTGTTAATTGCAGTGCTGGGTAGTATTTTTATGGCACTATGTGCTCTTAGCATAACAGTTAAGATGTTTCAAAGGACTTCATCTAAAAAGGCTTTCTCAGATAATTACTCTCTCGTCGTCTATGATTATTCATTTTTGCAGCACTGCACAAAGAATTTTTCAGATAAAGTGGGGCAAGGTAGCTTTGGTTCAGTGTTCAAAGGATTGCTCCCAGAC…
Seq_212448	Sobic.005G122400	xa21	Oryza sativa Indica Group Xa21 gene for receptor kinase-like protein, complete cds, cultivar:II you 8220.	Oryza sativa	CATGCATTGTTTTGCACTTATTTTCAATTCGGCAAAGCAAAAGAGCAAAAGCCTTTTGGTATAAAAAAAAAGAGCGAATGACTTTTCTGGCATGATTTTACACACATGCCCTTGGCTGAAATCTAGTAACAGAGATCACTTGCAGTTACAGAGCTTCGCCTCTATCATATGACTCCCTGACGGCCTGGAGCTTCATGGACACTTCCCTCATGTTCATCCTCTCGTTGGGCAGTTGGCGAGTGCAGCACAGCCCAATGCTCAGCACGGAATGCACACATTCCGTGACCATAGCCGTGCTCTCGCTGTAAACTCCGAAGTCGTCGATTTCTTCCTGCAGTCGGGCATCCATAATCTCCAGTATATGGTCAGGGAAGCTTGCCTCTACAAAGCTCACAATGC…
Seq_212511	Sobic.006G117800	Pid2	Oryza sativa Indica Group cultivar Digu B-lectin receptor kinase (Pid2) gene, complete cds.	Oryza sativa Indica Group	ACAGTTTATCTCAAGGTGCCAAAGGATAATTATTCTCAGACTTTACTGAATACTGAGGCCAGCAGTAAATGGAAAACCAATAGGAAGGATTGGATACTTGGAGGATCAATCATTATAGGTAGTTCTGTCTTTCTGAACTTTCTCTTAATCTCAGCCCATTTTCTGGGAGCTCGCTCTTGGGCCACCAGGCAAAAGAATCATTTACGAGCATGGACCAGGATGATGACAAGAGATTTCACTTACAGAGAGCTTGAGCAGGCAACTAATGGGTTCAACGAGGAAGTGGGCAGGGGAGCTTCTGGTATAGTCTATAAAGGGTACCTACATGGTGAGTTTGACACCAGCATCGCAGTCAAGAAGATCATCGACAGGATCCCACAAGAGACAGAAAAGGAGTTC…
Seq_212581	Sobic.006G021200	Lr1	Triticum aestivum Lr1 disease resistance protein (Lr1) gene, complete cds.	Triticum aestivum	TCCTCAAGGAAGTTAGATTTTGGAGACCTGTCAATGAGAGTGAGGTCTTGCAAACATATAGCTCTTCTAGTTTATGCATATTGTGGAATGCCAGAGCTCCATTGTATGCATCAATCACCAACTCATTCCTATTATAGGAGAAGTAGCCATTTGTAGTTTTGACTCTAACAAGATCTATTGTAGAAGTATGTGGAAGGGGAGGTAGAGACAACTGTGGGCAGGCCTCTATCACAAGCTCACGCAAATTGGGAAACCAAGTCATGTTAGAATCTTCTGTGGAGGAGCTAATGCAATGTGAGAATGGCAGTTCACTAAGTTTAGGGCAATTTGAAATAGCAAGTTTTTTAAGCTGATGAAACAAATGCCGAGCACCTGCTCCAACCCATTTTTCAAGTTGTG…
Seq_212775	Sobic.008G075700	Ve2	Lycopersicon esculentum verticillium wilt disease resistance protein Ve2 (Ve2) gene, complete cds.	Solanum lycopersicum	ATCCATTTTATTTCTCAAATTACACAGGCCTAAAAAGCATAAATTACAGCATAGGCTTAATTGTTTTTGGCTACTCTATATATGTAAGATAGAAGGTTTGATCTTCACATACAAACTATGGATAGGACTCAATACAACAGCTCTATCAAGACTCAAGGTCTGGTTTCAGTTTTGGCTGTGGCTTCCCCATATCACTATGACTGTAACTTTTTTCATTGTTTACTTCCGCATCTATTTGATGACATCTTTCCAGAATTGCAGGGAAATATGAGTGATCTCCACATACAAAGTTTTGGAGCAATGTGTACGCACACCAATAAGAGGTGTCGAGAGTCAAGATTGCTTCCATCTTTGTCTTCCACATACCACTATAATGGTAATTGAAAAGCAGATGCCAAA…
Seq_213318	Sobic.004G209900	RFO1	Arabidopsis thaliana RFO1 (RESISTANCE TO FUSARIUM OXYSPORUM 1); kinase (RFO1) mRNA, complete cds.	Arabidopsis thaliana	CACAAACGACACTAATGCAGGGTCCTACAAGTCCAAGCATATTACCCGTTGCCTTTACGTATCAACTCATCCCCAACTAGGCAGCCTTCTCGCTTTTTTCCCCTGATGAATAAGCAAATTCGCACATGCGAGCTGCCAAAAGGTAAGGAAATAGTGTGGAATTTACAACGTTCACATGTCGTATCTCGTAGGAGTTCAAAAGGAAGTGGCACGTACTGAATGTTCAGAAAAGTAATACTCTGTTCACTGTTCCCGTTTGGATGAAGATAGCTCAAGAGAAATTGGGCCCGTGGCATAAGCCTAGATACAGTCATACAGGCTACAAACTGTGCTCTCCTATTGGACGCGTATAGAACCTGAACTGAAAAGGAACGGCTTCTGTTTGTAACTCTGTACGTT…
Seq_213646	Sobic.010G276800	Pit	Oryza sativa Japonica Group Pit mRNA for NBS-LRR disease resistance protein, complete cds.	Oryza sativa Japonica Group	CGCCACCAACAAAGCACTCACTTCCCGTCAGAAGATGAGCTTGCCTTCCATGGCGTCGGCCGATTCAGCTGAGTTGGCGGTTCTGGCTCGGCGATTCGCCACCTGACGTGCCCTTGTGGAAGGCAATCCCCGCCGTTTCTCCACTTCTCGTTGCCAAAAATAACGCACCTACCATACCAGGCCGCCGGCACCAGGGATCATCATTGATCTCGTCGCATCGAAGCTGAGCCGTTCGTGACAGCGACAGATCCAAAAGCTAGGCTTTTGTAGCTTCTTCCTTCCTTTCCTTGTTGCATTTGGAAGGAAGGTGGAGGTCCCCTTTTGACAGCAACAGCAACAGGGAGAGGGGAGGGGAGGGGAGGAAGGTGGTGGCCGGCGAGGTGGTGGCATTCGCTGTCG…
Seq_214187	Sobic.005G110508	Pi-ta	Oryza sativa (japonica cultivar-group) pi-ta protein (Pi-ta) gene, complete cds.	Oryza sativa	ATAAAATGAAGAGACAGTATTGTCAAGTGTTAAGACAGTACAGACACCACGAATGAACGTGCTAAAAAGGTCGTTACACAAACTTGCAGTTCGCTGCGGTGGCTCTTTCGAGTAGTACATCTCATCAGAGTCACAGGGCAGCCTTATTCATGTGCTATTGTGCTTGCCAAACGAGAATAAGCGAACAACACAACAAATTAGAAAGCCATACGATACGATACGATACGATACACTACAATAAACGAGATAAAACGGCGTGCGCACGCCCATGCACACAGATGCCCCCTGCGGCCATGCCGAACTTAAGGCATCGGTTGCCTGGTTACCCTTGGCCTGTTAATGTGCCTCCGTGCTTTCTCCTTCCAGAACTCCAATTCTGTATCACCAGCAGAGGAATGC…
Seq_214300	Sobic.003G188000	RFO1	Arabidopsis thaliana RFO1 (RESISTANCE TO FUSARIUM OXYSPORUM 1); kinase (RFO1) mRNA, complete cds.	Arabidopsis thaliana	CGTTGTATTTATTATGGTGGGACAAAATATGTACAGTTGTGGTGGTGCCCACCAGTCTAGCACACTTTATGAATTATAGGATGCTGGATTCCTCTCAAAAGATCTATCTGCTAACATGATCATTTTACATAACACATAACTGTACAAACTCTTAAATATATTTCTCTTGAGAACTAGGAAAAAATCACCAAGCTTATCTCCCACTTAAGTAAGATCGGGATGAGCCTGACAGTGACGGAGCAGAATTTGAAGACAGCAATCGTGAATGTTCCCCTTCTTTGATGTCCTCAACAGCATCGACATTCAGAAATGGAGGGTCACTCAAGACAATCTCCAAAGCATTCCTGCGGTTTCTCAGCAACTCCACCACCTTCCCCATTGTAGGCCTGTCGTCAGGAT…
Seq_214324	Sobic.008G115700	Lr10	Triticum aestivum resistance protein LR10 gene, complete cds.	Triticum aestivum	TATGACTGACATTTGGTTCTCAATACAGACGTCTTATTATAACAAACATGTCGTCTATCTATGGTAAAATAATTAACCGCAAATCGTCATAACGACAATGATGACCAATTGACCATTGGTTCCCAAAAGATTAGCAAGAATATGCACCTACATAATTATTGATGATAGATTGTAGCTAATCATCGTACTTGATGACAGAATGGAACACGACAGTGACGAAACACTGCTAGATTTCTTATTTCACAACCCCACTAGTATGGCAGTAGGCCCTCGCAACACTTGCGTTTTCTTGAGTGCTTTTGCTGAACCTCTTTGTCGTATGTTGGACTGTCTTCCACCTCCAGAACCATTTCCATCCTGTCCTCATCCTCCACTGTACTGTACTCCCTAAATCTCTCG…
Seq_214325	Sobic.007G019600	EFR	Arabidopsis thaliana EFR (EF-TU RECEPTOR); ATP binding / kinase/ protein serine/threonine kinase (EFR) mRNA, complete cds.	Arabidopsis thaliana	CAAGAACTCACTCGGTCACTCTCACTCTGCCTCCGCCATGGCGTCCAGGAGCTCCCTCCTCCCGCTCCTGCTCCTCTGCACCGCCGCTGCCGCCGCCGCGGCGTCCTTCTCGTCCTCGCGCAATGCGGAGCTGGACGCGCTGATGGAGCTCAAGGCGGCGCTGGACCCGGCGGGGCGCGCGCTGGCCTCGTGGGCGCGCGGCGGTGACCCCTGCGGCCGCGGGGACTACTTCGAGGGCGTCGCCTGCGACGCCCGCGGCAGGGTCGCCACCATCTCGCTCCAGGGGAAGGGGCTCGCCGGCACCGTCCCGCCCGCCGTCGCCATGCTCCCGGCTCTCACCGGCCTCTACCTGCACTACAACGACCTCGGCGGGGAGATACCGCGCGAGCTCGGCGGCCT…
Seq_214757	Sobic.010G032500	Pid2	Oryza sativa Indica Group cultivar Digu B-lectin receptor kinase (Pid2) gene, complete cds.	Oryza sativa Indica Group	GTTCTCCATGTACTCGTACACGAGGAACCGCGGGCCGTTGCGGACGAGGCAGAAGCCGAGGAGGCGGACCAGGCTCACGTGCTGCACGCTGCCGATGGCCGACACCTCCGACCTGAACTCCTTGTCCACGTGCGCCGACCCGTTGATCCGCTTCACCGCCACGGACGTGCCGTCGTCGAGGATGCCCTTGAACACCGTGCCCGACGAGCCCCGCCCCACCACGTACTGGAAGCCGTCCGTCGCCGCCGACAGCGCCTCGAGCGAGAACCTGCTGGGCAGCCCGGCGACCTTGCGGAAGTAGCTGTACTCCACGCGCACCGCAGACACCTCCTCGCCGCCGTCCAGCACCGGGCGCCTCACCATGCGCTCGGCTCGTCCATGGGGGCTCAGCGCGTGGCA…
Seq_214801	Sobic.002G376100	Cf-2	Lycopersicon pimpinellifolium leucine rich repeat protein Cf-2.1 gene, complete cds.	Solanum pimpinellifolium	GTAGAATTCATATGCCAGCAAGCATTGTCCATGCTCTGAGCAGTAACCAGCAAGCTCAGCAAGGTTTGGATGATTCAGCCTTGAAATGTTTGCAACCAACTCAACGAACAAATCTGAAGGATGGCTTGGAAATGCAGAAAAGTTTATTTTCTTTATAGCCATGACCTTCTGATCACCGAATTTTGCTTTGTAAACACGGCCTAACGATCCCTCACCGATAAGACTGTCAGGACTGAAACTGCCTGTTGCCACCTGAAGGTCTGCCACTGTGTATGCAGGTATTGTGATGGAAGACAAACTTACTTTCCTTGAGATGGACTTGTTAGTGGTATCATTTTCATCGAAGGACTTGTGCAGGTCAATTTTTGTTGGAGGCTTCAAACTCATCGAAACAGTCTT…
Seq_215021	Sobic.010G170150	Serk3A	Nicotiana benthamiana SERK3A (Serk3A) mRNA, complete cds.	Nicotiana benthamiana	TGGCGGCGTCATCAAGGGGTATACCTGTTACCTCGTGTACCAAGTGGGCGAGCTCCAAATCACCCTGCCGCCGGCGCCGGCGCCGACACCGCCTACTCCAGAACCATCAAAGATGGGGATCATGATTGGCGTGTCTGTCGGTTCCGTCTCGATCTTGATCATCCTGGGCTTCTTCTCCATATGGCTGCTTCGCCGGCGACGGAGGAGAATCCTTGAGGAAGCAAGGGAGCAAGAGCTGGGAGAAGGAGGGTTCTTCGACGAGGAGCCGGAGATGGAGGACGAGTTCGAGAGAGGGACCGGGCCAAAGCGGTTTCGCTACGGCGAGCTCGCCATTGCCACCGACAACTTCTCGGACACACAGAAGCTCGGGGAAGGGGGGTTCGGGTCAGTGTATAGAGG…
Seq_215225	Sobic.010G130700	LeEIX4	Lycopersicon esculentum EIX receptor 2 (Eix2) gene, complete cds.	Solanum lycopersicum	GGTGCAGCAACCGGACTGGCCATGTCGTCGAGCTTCGACTTGGCAACTCCAACCTCTATGATGGCTATGCTTTGGTCGGGCAGATAAGTCGTTCTTTGCTTTCTTTGGAGCATCTAGAGTACCTAGATCTCAGCATGAACAGCTTAGAGGGCGCCACTGGACAAATTCCAGAGTTTTTAGGCTCTTTGAAGAACCTCCAGTACCTAAACCTCTCTGGGATACCATTTTCTGGCAGAGTGCCACCTCACCTCGGCAACTTGTCAAAGTTGCAATATCTCGATATTTCTAGTGGTGCTGATACATTCTCTGTGGACATGTCATGGCTAACACGTTTGCAGTTTCTAGATTATCTTAGCCTCAAAACAGTAAACCTCAGTACAGTAGCTGACTGGCCTCATG…
Seq_215797	Sobic.005G062600	Mlo	H.vulgare mRNA for Mlo protein.	Hordeum vulgare	GACCGTGAGGCGCAGTTCTGAATTTGGACCAAGCTGCCTCAAGTATCTCCGGCCTCTCAGTTAAGAGACATTACAGTTTTTACTTTTATACACATTGTCACTGCCACGGTTGGGCCAACCACTCTACATATTACACATGTCGTTTCAGTACCAACTCAGTCCTAGTAGTACCAAATCCTAACACACAGGTCGTCGGTGCAGTATGTAGTTTTGGTGAGCAGCGTGCGGGGTCTTAGCGAATCAGCAACGGCGTCAGTCATCTTTCTCAATGCAGGACGGCTCATCGTCGACGGTGGCCACGGTCAGCTGGTCGTCCAGCGACGTCGCCGACGCCGTCCTGGACAGCGTGCACACCGTGTTCGTCTCGTGATCCGTCTCGTAGGTGGTGTCCAGGGAGCA…
Seq_215879	Sobic.002G333300	Serk3A	Nicotiana benthamiana SERK3A (Serk3A) mRNA, complete cds.	Nicotiana benthamiana	TCGAGGTCGAGGCAGGTGAGGGTTCAATGGATTTGCCGTTTGCACAAGCATCCCGGTAAAAACTTGCAGTGCTGACGGGCAGAATTCTACCTCGTCATAGTTGGGTGGAGGACCAGGGTGCGTCGCTTGTGCTGGCCGAATAGTCGCGAGAGCCATGGCCGCGGGTGCGCGGCCACCATTAGCTCTGTTGCTTCCCCTGTTCGTTACTTTCTTCTCCTCCTCCCCTGCCTCCGCCTCTGCGGCTGACACCCTCACCGCCAACTCTTCCCTCAGCGATGGCCAGACGCTCGTTTCAGCCGCTAGAGTGTTCGAGCTGGGCTTCTTCACCCCGGCTAGCTCGACGGCGAGGTTCTTGGGCATCTGGTACATGGGCCTCGCTCCCCAGACCGTCGTCTGGGT…
Seq_215880	Sobic.005G193300	MLA10	Hordeum vulgare MLA10 (Mla10) mRNA, complete cds.	Hordeum vulgare	GAGAGATTGCAGTTTTCCTAGTCCCAAACGGCTGCTACCAGTTTCTCCTCCCATCCTCACATAGGAAAGGCTGAAAAAGAGCTCTCTGAGCCTGGGCATAGCTCCTCGTAGAAATACCACAGGCCATGCGAACCTGCAGAACTCGCCACGTACTAGGCATGGGAACGAACCAGCACCAAAAACGAATTCATCATGGTTTTTGTGGTTCTCGTGGTGCACCTCCAGATCTAGATAGCGGAGGGCTGGAAACCTCCCAAGGATTTTGAGGTCAACTGGCTCTAGCTCAGTCATGGCAATGGATACGGTGGTGAGACTCACAACAAGCGACGGATTCATCATCCAAGTTGGCAGCTTTGACAACCAGCAGCTCCGCCGTGTCTTCAGCACACTGAGGTGTCG…
Seq_216025	Sobic.003G319300	Pid2	Oryza sativa Indica Group cultivar Digu B-lectin receptor kinase (Pid2) gene, complete cds.	Oryza sativa Indica Group	GCATACTCAGGAGCCATGTAGCCATATGTTCCGACAACTCTTTTCGTATTAGCTTGTGTTCCTTTGGGATCAAATATTCTCGCCATCCCAAAGTCGGAGATCTTAGGGTTCATATCAGTGTCCAACAAAATGTTGCTTGCTTTCAGGTCCCTATGAATAATTCTAAGTCGAGAATGCTTGTGGAGATAAATAAGACCCTGTGCAACCCCTTCAATTACGTTCATCCGCATTTCCCAGTCTAGCAAAGCTCTTCTTGATTTTTCAAATAAGAAGAAATCCAAGCTTTTGTTCGGCATGTACTCATACACTAATAACATCTCTTCCTCTTCAATGCAACAACCTAACAGCCGGACTAAATTTGTGTGCTGAAGCTTAGCAATAAGCAGGACTTCATTCTTA…
Seq_216147	Sobic.008G151000	RFO1	Arabidopsis thaliana RFO1 (RESISTANCE TO FUSARIUM OXYSPORUM 1); kinase (RFO1) mRNA, complete cds.	Arabidopsis thaliana	TTATAAGACGTTTTGGCTTTTCTAAACATAGCTTTTGCTATACACTTAGATATATGCTATGTCTAGATACATAATAAAAGTTATTTATCTAGAAAAAACAAAACTGACTTATAGTTTGAAATGGAGGGAGTAGGTACGAAGCGAAAGCGAAAGGATGTATGGAACATATTCTAGACAGTTAATTGCTACGATGATTCCTGGACTTGACCCAACAGAAATCCCAACAACGACAGGATGCAAATACTTGCAGTATGTCCAAGTCAATGCACACACAAGGATAGGCCGGACCTGGTCTGGAGTTTCTGGACCATACAATTGCCCAGCCATCTTGATGCTCCGCATGGAGTTCGCATACATAAATCCTTTGTCCTTCCTCAAACTCTGAGGCATAGAAGGCAA…
Seq_216200	Sobic.003G128700	Bs3	Capsicum annuum cultivar ECW-30R Bs3 (Bs3) gene, complete cds.	Capsicum annuum	GTGGGCTCGCTGTGGCGGAAGCGCGCCTACGACCGGCTCCACCTCCACCTGGGCAAGAAGTACAGCGCGCTCCCCCACGCGCCGCACCCGGACTCGGCGCCGACGTACCTCCACCGCGACGAGTACGCGGCGTACCTGGACGGGTACGCGGCGCGGTTCGCCGTCCGCACCCGCCTCCGCCGCGAGGTCCGGTGCGCGCGGTACGACCGCGACACCGCGCGGTGGGAGGTGGAGGCCGTGGACCTCGGCGGCGGCACGGGCGAGGTCGAGCGGTACGCGGCGAGGTTCCTGGTGGTGGCGTCCGGGGAGAACGCCGAGAAGTTCGTTCCCGAGGTGCCCGGGCTCGAGGCGTTCCCCGGCGAGGTGATGCACGCCGCCGAGTACCGGTCGGCGGAGGGG…
Seq_216357	Sobic.003G059100	Ve2	Lycopersicon esculentum verticillium wilt disease resistance protein Ve2 (Ve2) gene, complete cds.	Solanum lycopersicum	AGCAACACTGCCGGCGCCGGGTCATCATCATGCTCTCCGGCCGACGCTGCCGCGCTGCTCCAGCTAAAGCAATCCTTCGTCGACCCCAAGGACCTCACGTCATGGCGAGCCAAGACGGACTGCTGCCTCTGGGAAGCCGTCTCCTGTGACGCGACCTCAGGCACAGGGCGGGTGATCCCGTTGGATCTAGGAGGCCGGAACCTGCGGAGCCGCCGGGGCCTTCACCCCGCGCTCTTCGACCTCACCTCTCTGAGGAACCTCAGCCTCCGGGGCAACGACTTCATGGGGGAGAGCCTGCCGTCCACTGGGTTCGAGCTGCTCAGCGAGATGGTCCACCTCGACATAGCCGACACAAATTTCAGCGGCCAGATCCCCATCGGCGTAGCGCGGCTCAGCAAG…
Seq_216472	Sobic.002G176500	Serk3A	Nicotiana benthamiana SERK3A (Serk3A) mRNA, complete cds.	Nicotiana benthamiana	AGAGCTCAGAGACCACAGACCATAGGGAACTTCCAGTGTTCTGTCACAGACATCTTCCTTAATATTCCCATGGAATATGAAACAGAGACTACTAAAATGCATAGGGCTTTACCTGTACTAGACATTAGTATGCTACTTGCTATTTACATTGCACTGGTGAACTTGATACAAACATGCTGGCTTATCCCTAGTAGTTCCTATATGTAAACCTAGTTCATGATGCACATCCACTACATCTAACTTACCAGTGGTCTCAGGATACCATCTATATCAATGGTCGATGATTCATTAGTATCACTGCATGAGGCTTGTCCTGTCAGGCTCTGACTCTCACTTGGGTTTTGCCAGAAGTTCCTGCGTACACCACTTGAGCCCAGGCTATTTGCTGCAAGTCTGAGG…
Seq_216667	Sobic.005G182200	Pikm2-TS	Oryza sativa Japonica Group Pikm2-TS mRNA for NBS-LRR class disease resistance protein, complete cds.	Oryza sativa Japonica Group	GAAGCATCAGCACTGTTTGTTTTACACAGGTATTTGTAGGAGAAAGCTTTTGCTGAGTTTCACTCATTCATACAACATATGACATAGGTTTGCCAATTCGAATGCAAATCAACAATACTATTCACACTCACACAGAGGACACGTGGATGGGCTGTTATTCAAACACAGTAATGGCGTAATCAGACAATTGCAAGGAATACAGTAACAAGAGCAGTTTCAATGTCCATCACTCGTAGTACTCATCAACTACTATTGTGGGTTTCTTCCCATGCATGCTTACTGAGCTTCTGATATTAGTAACTTTTTCCTTAGTAGCATCAGAAGCCTGCTGGCTGACCCTTAGATAAACTTGTTGAAGACTCGCAAGGTTTTCCAAACCGTAAGCACCTTCGGATAACC…
Seq_216737	Sobic.002G289500	Pid2	Oryza sativa Indica Group cultivar Digu B-lectin receptor kinase (Pid2) gene, complete cds.	Oryza sativa Indica Group	GGTTCGAGGAATAATCCTGAGTGCAACCTGTACGGCTACTGTGGCCCGAACGGCTACTGCGACGACACGGAGTCTCCCCGCAGGTGCAAGTGCCTCGACGGTTTCGAGCCGGTGGGCTTGGAGGATTGGAACAGCGGCAGGTTCTCTCAGGGTTGCCGGCGAAAGGAGGAGCTGCGGTGCGGCGACGACCGTTTCTTGGCCTTGCCGGGGATGCAATCGCCGGACAAGTTCGTGCTCGTCGAGAACCGAACCTTGCAGGAGTGCGAAGCAGAGTGCACCAAAAACTGTTCGTGCGTGGCGTATGCTTACGCCAACCTGAGCACTAGCAGAACCAAGGGGGACCTGACGAGGTGCTTGGTGTGGGCCGGCGAGTTGATCGACACATGGAAGTCTGATACA…
Seq_216776	Sobic.009G208300	Xa26	Oryza sativa (japonica cultivar-group) bacterial blight resistance protein XA26 (Xa26) gene, complete cds.	Oryza sativa Japonica Group	GATCCGACAAACCCCACGTGTGTGCCAATCACGCACACACAAACAACTCTCCGGTCTTCACACGCTTGAAGGACATCTTGTCACGAGGCGCAACGACACTCCACCGCACACAATCAACATCGCGAGTTACAGCAACACAAGTACGTACAGAGAATCAGAGATCAACCGGTGCAAATAATGCAAGTTCATGCCAAAGAATTGCATGCAATGCACCCACGCGGCCACGCTGGATGATCAGAGCTCAGAGCAAAAGGCAGCTGCACAGCGCCACCGCGGCGGGCCTGAGCAGCCCGGCCGGCCAGCGACCCCTCGCCACCTCTCCCCTGACCACTCTCCCGACGACCAAGCTCTCCGCGGCGGCGGACGTTTCGCAGGCGATGTCGTCGCCGCAGACTCCGA…
Seq_217271	Sobic.003G247600	Pid2	Oryza sativa Indica Group cultivar Digu B-lectin receptor kinase (Pid2) gene, complete cds.	Oryza sativa Indica Group	TAGTACTACTTCACAGCAGGAATTTCATGTTTTCATATAGGGTAATAACGAGTTTCTATTAAGCCACTACACATGGGTAACGAAATCCAGTGACTATAGTCATATGCCTGAGGTTAGTCCCTCCTGGTAACTCAAACGACAAATAAAGATGAAGGTGCTTCTATGCTCCCCTAAAGGAAAACTATACATATCCTAAGGGTAAAAGAGATGAACCTTTTAGGGGAGTATAGAAGCACACCCGGAAACAGGGGTAAAAAAAACAGGAATGAACAACCTGCTACTAATTGATTTTAACCACCACCTCCAGTATATGCAAACTGTAAACCTGATCCACTCCTCAATAAGTACTGAGCAATGATCAAATCAATGTTGTTATCAGATGATTTTGGGGGTCCTATT…
Seq_217636	Sobic.004G091500	xa21	Oryza sativa Indica Group Xa21 gene for receptor kinase-like protein, complete cds, cultivar:II you 8220.	Oryza sativa	GCATTCTGCAACAAAACTTTGAGAGGCACCACGTTGTGTTAGGTTGAGCACCTTCACAGCAACAAGTTGCTGCGCATCACTTGTCATACTTCCCTTGTAAACTGAGCCAAAGCTTCCTGCTCCTATTAGATTCTCGGAGGCAAAACCATTTGTTGCATTGACCAATTCAGCATAAGAAACTCTTTTGTACTGCTCATTGATAAATGATGTTTGTAGGTTTGACTTTGTCTTCCTGGCCCGACAGTAGCACAAGAACAATGCAATTACTAATGTGATAAATAGAATCACACTGCATACGGATACCGTTATGACAAGCTTCCATATTGGCTTCTTTTTCTTTGTAGAGTGGTTGGAGCAGGGCGGCAACTTCAGCTCAGGGATTCCATTACATAGGCCATC…
Seq_218096	Sobic.004G136600	Xa13	Oryza sativa (indica cultivar-group) cultivar IR24 disease resistant allele XA13 (Xa13) gene, complete cds.	Oryza sativa Indica Group	TCTATTTAAGCAGCCCCCCTCCTTCACACGCTCATCACTCACCAAGAACCCAGAGAGCAGCAGCATCAGCTCATTCAATTCGTTTCTTCCTCATCTTTGGTCTCCGTCCTCTGTTTCCTAATTGAGTTGCGTCGTCACACCCATATCTCTATCTTGTTCGTCGTAGAGAAGAGGTAGCCACTTTCTCTACAGTTGTTGAGCTAGCGCAGGCTATCAGCTTCCCGAAGCCAGCGGCGACCATGATTTCCCCGGACACCATCCGCACCGCCATCGGCGTCATCGGCAATGGGACTGCACTCGTGCTCTTTCTTTCCCCAGTGCCTACGTTCATCCGCATCTGGAAGAAAGGGTCTGTGGAGCAGTACTCGCCGATCCCGTACGTGGCGACGCTGCTGAACT…
Seq_218177	Sobic.002G326400	Pid2	Oryza sativa Indica Group cultivar Digu B-lectin receptor kinase (Pid2) gene, complete cds.	Oryza sativa Indica Group	AGCAACCTAACGAGATTTTTGTGTTGAAGCTTTGCTATCAGCTGAATTTCATTTTTGAACTCTATTAAACCTTGTACAGAACATGCTGCAAGCCTTTTGACTGCTACTTCAACACCACCAGGCAATAGGCCCTTATAAACAGGTCCAAAGCCACCCTGTCCAAGTTTGTTTTCACTTGAGAAGTTGCCGGTGGCTTCTTTTATCTGAGAGAAATCGTACAGTGAAAATCCTGAGTTTCCTTCTTCAATCCTCCAAAGATTTATAACATTTTGTATTGCCATTGACAGCAATTGCAGTTCGTATCTTGCTCGTTCTCTTTTTCTCTCTGTTCTGATCCATATATGAACAAGCAACCAAGAAACAGAAACCACGATGGAGAATGATCCAATAGTGATCCAG…
Seq_218369	Sobic.003G080600	Pid2	Oryza sativa Indica Group cultivar Digu B-lectin receptor kinase (Pid2) gene, complete cds.	Oryza sativa Indica Group	GAAGTTCCCCGTCGCGTCCTTGAGCTCCCGGTACGTGAACCTCCTGAACTGGCCCGTGACCATCCTGTATCCTGCTGCCTCCAGTGAGCTGGGTATGCTCTGCTTGCTGGAGAGGAACCAGCACCCAGTCAGGATGAAGATCAAATCGACAACTCCCAGTGCTCCGGCGAACGCAAACAAGTACACCCACTTGGCGTCGTTTCCGTGTCTCGGGAACGCGCCTGATGATCCTTGGAGGAGGATCGTGGTGACGTTAGGATTGCAGGCGATGCCTGCGACGGTGGTCCGCCGTGCGGCCTGGATCAGAGGCGCCGAGGCGTTGAAATCGATAGGTACTTTGAGGTAGATGGTCCCGGGGAACGATGAAGACGTATAGCCATTGAACAGCATGCTTTTAGG…
Seq_218376	Sobic.010G057800	I-4	Lycopersicon esculentum disease resistance protein I2 (I2) gene, complete cds.	Solanum lycopersicum	TATATCCTTGTAGACCTTCTATGTGTCATACATACACACAAGCACACCACACTTGCATATAAAGTACTGTATACGATTGCATAGCTATTGGGCATATGTACCACGGATCTCACATTGACATATGTAGCTATAGCAGGGCGGCAGCACAGATTTCCAACACAAGACCTCGAACCTTCCTCGTGGTTGTGCTCGTTCCAACAACATATCCATCATCGTCACCTCCGGGTCCGGAAGGTCCTCCTGTTGAGGTTGAGCTGAGCACTTCTGGTAAGTCTCGTACACGAGGAAACACTCATTGGATTTCCGCAGCTTGTTCATGCTCCAAGTGCGGCGAGGACGATCCTTGGCCTTGAGGTCGTCCGGGTACTCACCGAACAGCACGAGGTTCTTCCGCATGTA…
Seq_218422	Sobic.008G067800	Pi-ta	Oryza sativa (japonica cultivar-group) pi-ta protein (Pi-ta) gene, complete cds.	Oryza sativa	CAAGGTTGCTTCACCCATACACATTATATCCTGCTTGGCAACCACAAGTCAACACCAGGATGGAGCGTGTGAAACAGGCTCTTCAGTGAAGAGAATGAAGCTTTGTCGCCAAGGTTACTATGACAGTACAGAAATATCCTTTCGAGGCCAGCAGGTAAGTGCTCGACGCCAGCAGGTTCCAACCAATTGAGAACCTCTTCCCATCCAGCCACAGTCAACCGCAGCTCAAGGTTCTTGAGCCTGGGCAGAGCCCCTGCTTCAAAGGCTAGGAGCGGTTTAGGACAGCAAAACTTGAGGTGCTTGAGAGCCGGAAATGCCACAACAGTGCCGAACGTGCTGGGGATGACAACTGTTTCCTCTGGTTCTTGTTTGATCACCAACCAGAGGTGTACAAGGGAG…
Seq_218650	Sobic.004G032800	RPG1	Hordeum vulgare subsp. vulgare RPG1 (Rpg1) gene, Rpg1-Swiss Hv 489 allele, complete cds.	Hordeum vulgare	GGATCAAATGCAAGTAAACGCTCCAGCAAGCGGAGAGCCAGAGGATCAGCATTATGGAACTTATGAGAAAAAGGAATAGGGCGCTTCCTCGGCATGGCAAGCAAATATTCCCTGGCCTTATCACTGCGAATCTTGGATAAGGATCTAAATGATGGTGTTCCAAGGAGATCTGTTATTAAGTCTAATTGGTGCACAACATTCCTCCCAGGAAACAATGGTGTTCCAGTGAGAACTTCGGCAAAAATGCACCCTATACTCCAAATATCAATTGCAGGGGTGTAACTGGAGAAAAAGGAGCCACATAATTCAGGAGCCCTGTACCACCTTGTTGCGACATAATCTGTCCAATAGATAGCTGAAAGAGAGTCGTTAAATGATGCACGTGCAAGTCCAAAGTCA…
Seq_218660	Sobic.006G012200	Bs3-E	Capsicum annuum cultivar ECW Bs3-E (Bs3-E) gene, complete cds.	Capsicum annuum	AATAACTACACTGGTGGTGTGTATACAATAGAAGAAAGAAATGAACATGCTACTAGGTCAATGAAAAATAAAGAGAGCCTCTTCTTCCATCAACAGGTTGCTACTATACACCAAGCTAGCGGCCATAGCTGCAGTAAAAATCCCCTAGGGCTCACTCACTTCCCCTACTGATGGGAGGGCTCCATTTTTTTACTCAACTCACTCTCACTGTTTTTACCGTATAACCTAATCAACGACTACTACTACTAATGTACCTGGCAGGCAAATTAAAGAACAAATCAACAACAAACCAAGGGGATTGGACTGACTAACTAAAACACCATGATCGAACAACTGTATGTGTCTCTGTATGTGTGCTTCAGTAAGTTAGCTTCCTTCGTCAAGCTGGTGGCTCCATGG…
Seq_218850	Sobic.003G289800	Serk3A	Nicotiana benthamiana SERK3A (Serk3A) mRNA, complete cds.	Nicotiana benthamiana	TTTTAGATAATGAGCAAGATTGTTTACTGGACGGGAGTATTTATCAGAGAATGCCAGGAACAAAACTTTCTGTGTACTCTTTCACTGGGAAAAAGAGGACTCATTTACTTATCTCCTGAAAGAATGCAAAATTTATTCCACCGGGAACAAGAATTGCCTCAGGGACGGGTAACAAAAAGAAAGAAAGAAAGAATCATGTAAAAGAGATAATTACATGTAAAGAATGACCAAAAAGAATGTTAATGATCTTGTACCGAATCTGTTCACAAATCTCTTCGGCTTCTCCAGCTTGCTTGGCTCAACTCGTCGCTACAATCCCGGCTGCCGAATTCCCTCAGCTGGAACAATCTAATCTCCTCGGATTGTGGCTCTAAGAATACCTCGCTGCGTCCGGGTTGA…
Seq_218930	Sobic.007G215500	RFO1	Arabidopsis thaliana RFO1 (RESISTANCE TO FUSARIUM OXYSPORUM 1); kinase (RFO1) mRNA, complete cds.	Arabidopsis thaliana	GGTCCTTCAACATGAAGATGATGACAAAGGGTTCCATTTGAAATGAACTCGTAAACTAGCAACGGGACTTCTGTCTCAAGGCAACAACCTAAGAGCTTCACCACATTTCTATGATTCACTTGAGAAAGAACTGCAACTTCATTTATGAATTCATTGATTTCTCGTTGAACTACTATCTTTGACTTCTTGATTGCCACAACATGTAGATCTAGAATTCCTTTAAACACGACACCATGCCCTCCACCACCAATGATGCGAGCTCTATCAAAATTATTTGTTGCCTTCTCTATATCACATAAGGTAATTATCATTCTCTCACCAATGTCTGTGCTTCGTGATATTAACTGTTGCAATAGCAGCCCATGATTTTGCTTGAAGAATCTTTGTTTCATCTTCTTT…
Seq_219278	Sobic.010G274700	EFR	Arabidopsis thaliana EFR (EF-TU RECEPTOR); ATP binding / kinase/ protein serine/threonine kinase (EFR) mRNA, complete cds.	Arabidopsis thaliana	TAACAGTGCATTCGGCTAGACTGGTAGTCCACTCGCTGTCAGGACTGCTAGGATTTTCACGGCGAAAATAAGCAAGTCGGGCTATTAATTTGACCACGGCATTATATATGCACACTTCAGCTGCAACATTGAGGCATGACCGACCATGATGCTGCTTCTCAGCATCCTCCTGCTGTCGCCCATAACCACCACGGCAGGGCATGGCGACGAGAGAGCTCTTGTGGATTTCAGGGCAAAGATCACCAACAACTACGGGGTGCTGGCCTCCTGGAACAGCAGCACCAGCTACTGCAGATGGGAGGGCGTCACATGCGGCCGCCGGAGACGTGTGGTTGCTCTAGACCTCCACTCCCAGGGGCTCACAGGTACCATCTCCCCTGCCATTGGCAACCTCACCTT…
Seq_219413	Sobic.005G092200	Lr10	Triticum aestivum resistance protein LR10 gene, complete cds.	Triticum aestivum	TTTTTTTTAAAATAACGTTCCACATGACACAAAAATTTGGAAGTTACGTTACAAATACTGATCGATCTTAATTTGGAAATAAATATAATAATGTCCCATGAGAAAGATCAACTCAACGCATAAAAAAGAAGACTACAGTTTCTAAAATGAAATGAAGTGTCGTACCCAGACAAAACTACCGAAGCAGTATCTAGGCAATGTCAGAACTAAAAGCCACATAGCAGTTGGAACAACCAGTTTAAGCTCCCTGACAGATTGAGATAGTTATGAACCAGCGGTGCCCCCTGCCGTCCGACGGGTGCCCATTGATGACCACAAATCAAATTTGCCTGTTCAATTCGTACATACTCCGCAGTCCGTACCTAAAAACAGCAAACAGATGATAATTGGTAGTCATAC…
Seq_219512	Sobic.007G098400	RFO1	Arabidopsis thaliana RFO1 (RESISTANCE TO FUSARIUM OXYSPORUM 1); kinase (RFO1) mRNA, complete cds.	Arabidopsis thaliana	GCTGCTGCTGCTGCTGCTGCCGGCGAGCCATGCGCGCGTGTGCCCGCCGTGCGGCTCGACGGCCGTGCCGTACCCGCTCAGCACGGGCGACGGCTGCGGCGACCCGGCGTACAAGGTCCGGTGCGCCGGCAACTCGTCGCTCCTGTTCGACGCGCTGAACGGCACGTCGTACCCGATCACGTCCATCAGCCCCGCGGCGCAGCGGCTGGTGGTCTCCCCGGCGCCTTTCGTGTCGCAGGGGCAGGGCAGCCCCCTGTGCGTGTCGGAGGGCGCGCCGGCGGGGCGCGGGGTGCAGCTGAACGCGTCGCTGCCGTTCAACGTGAGCTCGTCCAACACCATCATGCTGCTCAACTGCACCAAGGACCTGCTGCTGTCGCCGCTCAACTGCTCCGCCAACTC…
Seq_219521	Sobic.003G080900	Pid2	Oryza sativa Indica Group cultivar Digu B-lectin receptor kinase (Pid2) gene, complete cds.	Oryza sativa Indica Group	ACTGCAGAAGTACAGAGTTGATTCACAATTTTATATTCGCAGCATGACTTTTCACTGAATTTTTCATACAGATGGAAAGCGCACGCGCAAGTTAACTCTGATTGTGTCGATGTCTATCGCGGCTACTACCTTGGTTTTCATTTGTCTAGCTTGGCTGATTTACCGTCGGAAGCAAAAATTCAGATCAGGTTTCTGGCGAGCCTACTCTGCCGACCAATCAAATGAAGAAGTACTAAAAAGGTGTGGTTCTCTTGCTCCACAAAGGTACAAGTACTCGGAGCTTAAGAAAATAACCAAATCTTTCAAGGAGAAGCTAGGAGAAGGAGGTTATGGAGTGGTATTCAAGGGAAGCCTTCGAGATGGCCGAGTCATTGCTGTGAAGCTCTTAAAAGGTTCTAA…
Seq_219729	Sobic.006G210900	RFO1	Arabidopsis thaliana RFO1 (RESISTANCE TO FUSARIUM OXYSPORUM 1); kinase (RFO1) mRNA, complete cds.	Arabidopsis thaliana	GAAGTTTTTCACCTCCTTTCACACGCCTCCCAGCACCAGCTCACATCTCTCCTCCTTCCTCTCCAATCCCCCGGATCGAGCAACACAAGCAACCACCAGCCGGGCAAACGCCGTCTCGCTCCATGCATAAGGTCTCCGCCCGCCATGCCGCACCGCCGCCGAGCCCTTAACCCGACTCTGCCCCCGCCACCTCCCGCCGCCACCGCGTTCGGCCACCACGGCGCGGACGAGGCGCGGCTGCCGCTCCTCGCAGACTACGCGCTGCTCCACCAGTCCTCCGCCGCCTCCGTCTCCGTCGTCGACGCGCCCGCGGCGGCCTCCGCGTCGTCGGAGTGGAGCTCCGGGAGCACCTTCACCGCCACCTCCGACGCGGCCACCACCACCGCCACGGCTCCGGGC…
Seq_219739	Sobic.009G198400	Serk3B	Nicotiana benthamiana SERK3B (Serk3B) mRNA, complete cds.	Nicotiana benthamiana	AAAAAAACGCTGCGTCACTCGTCGGCGTGTCCCGACCGCGTGCGGCGGATAATCCCCTCGATGGCGCCGATCTCGCCGGACCTCTGTCCTTCCCTCCCCGCCGCCGCGACTGCGGCGCTGGACACGGCGGTCTGCGGCCGGCTCGTGGCCCCTTGCGCGCTGGCCGCCGCCTCGCTCGTGGCGGCGTCATCGTCGCTGGAGCTGGACGACGACGGGTGCAGCCCGTACTCGCTCGTCGCCTCGCTCACGTAGCTTCTGCTCACGTTCTCAGTGAGGCGGAAGCCTCCAGTGGAGGAGGTCCCCGGCACGAACGCCATCCGCCTCATCCGCCGCAGCTGCTCGGCCGCGCCGTCGTCCACGACCTCGCTCTGCCCCGGCGCCACGCCGGCGTTCAGGGCC…
Seq_220003	Sobic.002G326200	Serk3A	Nicotiana benthamiana SERK3A (Serk3A) mRNA, complete cds.	Nicotiana benthamiana	CATCCCAAAATCAGAAATCTTAGGGTTTAGATCAGAATCTAACAGGATATTACTTGCTTTCAAGTCCCTATGGATGATGCGTATTCGTGAGAGATTGTGAAGGTACAGGAGTCCCTGAGCTATACCATCAACTATTTTAATTCGTCTCTTCCATTTAAGTGATGCCTGTCTGATTGGATCAAAAATGAAGTGGTCCAAGCTTTTGTTCGTTAGGTATTCGTAGATCAGCATCTTCTCTTCTTCATGGATGCAACAACCAAGCAGTCTAACAAGGTTTTTGTGCTGAAGTTTTGCTATAACCTGGATCTCATTCTTGAACTCTGTTAGACCTTGTCGTGACCGAGCAGACAGTCTTTTTATTGCTACCTCTTGTCCATCAGGAAATACTCCCTTGTAAAC…
Seq_220236	Sobic.010G054900	Serk3A	Nicotiana benthamiana SERK3A (Serk3A) mRNA, complete cds.	Nicotiana benthamiana	GGATTATGGAAACAGAGCAAATGTATAATCACAATGTAACACCTGCACCTTTGCTGCACACCATCTACTCACCCTCAGCCAAACATCAGACACCGTTAAGATTACTAACCTGGGTGTACACCAGCCATTATCTGCTGTACCCCCGTCAGAACTTTAAAATGATCATTATATATAATTATTACATGTTGCAACCAGATACATCGTTATCTCGCTTTGCCAACCAGCCAAACAGTGTGATTGACCTGAGCGAGACATCTGGCGGGGTCACATCTCCAGGTATCGGCAGTCAACATCAAAGCTAATTTTGCTATACAATTAAACCAAACAAGCATCATCCATCAACCAGAAGCACACCGCTCTTCTTACAGAAGAACCGGCCGTCATCTATGCACCTTTCCG…
Seq_220500	Sobic.002G091700	Mlo	H.vulgare mRNA for Mlo protein.	Hordeum vulgare	GAAGAAAAATGCAATCTCAAATGCTATCTGAAATAGAATGAAGTGGATCAAATAGAGGACCACTTTAGGCTTGTGGAACCAAAAAAAATCATCTGATGGAGCAACGACCACATCCCTTTCTATTGCTGTATGTTTCTGTGCAACCTCAACAGCCATCTCAGTAATAACATGCTCCATCTTACATCCAATCACAAGCAGCAGAATGAAAGGGGCCAATGATAACCATGTGTAGACATTCCATCCATGAACATTCAGCAGCAAGAATATCATTAGCAAAACCCAAAGGTACCAACTTGTACCAACAACTTTCTTGTAATCAGCCTCAAATGCTCTGATCATGTAGTTGTAAAAGTTGAATTTTGGGTTTCCCCTGCAGTGTTTCTCAATGAAGCCAAGTCG…
Seq_220781	Sobic.002G321100	RPG1	Glycine max NB-LRR type disease resistance protein Rps1-k-1 (Rps1-k-1) and NB-LRR type disease resistance protein Rps1-k-2 (Rps1-k-2) genes, complete cds.	Glycine max	TCTCTAAACTTGAGAAACTGTGATAGCGTGAATCCAAAAAACCCAAAAAAATGCACTTCTAGCTATGAATCTGGACGGAGAGAGTATGTTTAACTCAGAATTCTGAAGCTTCTGCATCTGCTCAACTGCCGCTTCGCTCAGCAGTAAGATGCAGGATCTCCCAGCTCCATGAAGTGAGGACACTGGTACAGTCCATTGAGGAGCCAAGCTGCCGGTTATGTTTTTTTGACGCAAAAGCTGCCGGCTATGTTGTTCTCTGAAACCCGTTGCACCTGGCATGACGCTTCACAAAGATCATGCAGCTGCTTTGCAGTACAAGGATGTCCTTGAGTTGGTTCCATGGCTCAATGGCTGCACCGAGCGTGGATGTGGAATACTGGAATGCGTAATGGTATTAGC…
Seq_221076	Sobic.008G171200	RFO1	Arabidopsis thaliana RFO1 (RESISTANCE TO FUSARIUM OXYSPORUM 1); kinase (RFO1) mRNA, complete cds.	Arabidopsis thaliana	AGTGTATTCTTACATATTTTCTGTACATGGCTAGATACATTCATGTAAACAGTCAGGTATTTGGCTCTAAACACAGTTCAAGCAGTTATTTCGTTTTCCCCTTCTATGATGCAGTTTTGCTTCGTGCTAATGCAATGATGTTCTGAGACTTGATGCTGTTAAAGCTTCCTCTGAAAGTGCATTTGCTCGGTGTAAGGGGTCGATGGGATGGACCATAAAATGGAACATTGAAAAGAACTGCCTGGAATGGATAGCCTAATGTTAGGTCCTGATTGCATATCTATTGGATTTGGTTCTGTGACAAGATAATTTTTTTTATGATGACAAGGAGAGTTGCGCTTCATTTGATTTAAGAAAAAAAAGGCAAAGTATAATATACATAAAAGTTCGGCATTTCAC…
Seq_221170	Sobic.003G210601	LeEIX5	Lycopersicon esculentum EIX receptor 2 (Eix2) gene, complete cds.	Solanum lycopersicum	CTGGCGAGGAAGTCGCTCGGTGGCGACGGGTTGCGTGTTGATGTTGTGGTAAGGAACAGCCCCTCACCGGTGGCGTACATAGGGAGCAGGAGACCAATCGTGATTTGACTATCAGCCTATACAGGAAAGATACAATCATTGGTAACCTACCGTACAGGTCTAAACTACTATCTCTGGCCAAATCAAGATTGATTCCTTTACATATTTGTCACACAAGATTATCTAGGATATTAACTTGTCTAATAAAGGGTTCATGGACTAAGCAATGGAAGAAAACCTTCGTCAAATCTCTTGGCTTCCAAATTTCCTCAGAATGGCAGCCTTGTTGATAGCCAGTTGCACATAAAGCTTGTCATATAACTGGTCCAAAAGCTGAAAGTAAGCAATCCTCCACGTTTT…
Seq_221204	Sobic.005G019300	EFR	Arabidopsis thaliana EFR (EF-TU RECEPTOR); ATP binding / kinase/ protein serine/threonine kinase (EFR) mRNA, complete cds.	Arabidopsis thaliana	GAACCCGTTTTATGTGACTATGGGGATGACAGGCTAAATATCTCTATAGGCAATGAACCATTCAACTTATTGTTGTTAAAGGTTGCTACAGTTATCTCATGGAGACTTCCTAGGCTTGTCGGAAGAGTTCCTTCAATCTTGTTGTGATCAGTGTAAAGATTTAGTAATTTTGTCAGGTTTCCAAGGGAGGTTGGGATGGACCCCGTCAACAGGTTGTTGTCGACCCCTAAATATTCAAGTGAATTTAACCTTCCGATGCTCTCAGGCAGGGTACCACTGAGTCGGTTATTGGAGAGTGATAGCACATTTAGCCCCACGAGATTGCTGATGTGAAACGGAATGTTTCCTGAAATCTCATTGTAGGAAACAGCTAGGTCTTGGAGTTCTGATGATAGGTTG…
Seq_221304	Sobic.002G338900	Serk3A	Nicotiana benthamiana SERK3A (Serk3A) mRNA, complete cds.	Nicotiana benthamiana	CCAGCTCCCCCGGGTTGGGGTGCCGCGGCTGCCCCAGGAAGACCCCCCCCCCCAGCCACTCCTTGTGGCCCTGGGAGCCCTCGAGGTCGAGCAGCTTGACGGCGACGGCCTGCGGCTGCCGCAAGCCGGGCCTGACCCGGTCGTCGACGCGGCCCTTGTACACGGGCCCGAACCCGCCCTCGCCGACGAAGTTGCTCATCGAGAAGTCCCGCGTTGCCACCCGGAGCTCCTCCACCGTGAAAACCAGCACGTCAGATCCCGCCAGCGACAGTGATAGGTCCTCCGGCGAAGGCAGCGGCGCTGGTGCGGGAGGCCTGGAACTGGAGGCCACCTTGGCCGCGTTCTTGGACCCGGAGCCGGAGCCGGAGCCGGAGCGCGGGAGCGTGTTCCCGGAGCTCC…
Seq_221313	Sobic.003G059500	Ve1	Lycopersicon esculentum verticillium wilt disease resistance protein (Ve1) gene, complete cds.	Solanum lycopersicum	TTCGTGTTTATATAGCTAGGAATAGCCCCTAGCGTGACATGTACAACTTGGATTACAAGTTACAATGGCTTAGCTTACAAGCAAAGAAAGAAGATTTACAACAATCTTATACAAAAGGAAAGAGAGATCACGGTACCTCCTAGAGAGATCACGGTGGATCCTGACTATCCTTAACAAGATATAATTCCCAATTCTAACACTTTGCATTTTACACTTACAGGTTTCAAACATTCAGTACAGCATTATTGATGATACAAACATAGCAATATACTCACTAATGCAGAGGCATTTCTATTTGCACTCGCAGGCCATCTACATGAAGAAGAGGACTTTCTTCCAGCACAGATATATGTGGTTCTGGGATCTCCTCCTAACTTGGGTTCCACATGTCAGGACAAT…
Seq_221406	Sobic.001G487600	Pid2	Oryza sativa Indica Group cultivar Digu B-lectin receptor kinase (Pid2) gene, complete cds.	Oryza sativa Indica Group	GGCACTCCTCGTGCAGGTACCGGATGCCCCTGGCGACGCCGACGGCGATGTCGCGCAGCGCCGGGAGGCCGGCGCCGCGGCCCCTGCAGCCCAGGAGGTAGGCGTCGAGCGCGCCGTTGTCCATGTACTCGTACACCAGCGCGCGCACGACGTCGTCGAAGCAAAAGCCGAAGAGCCTGACGAGGTTGACGTGGTACGTGCGCCCGATGGTTCCCACCTCCGCCATGAACTGCTCCTCCTGGGACCTCTGCGCGAGGCTGCGGTCGAAGACCTTGACCGCCACGGGGAGGCCGTTGGGGAGCACGCCCTTGTACACCGTGCCGAAGCCGCCAGCGCCGAGCCGGGTCGTGTAGTTGCGCGTGAAGCCGGCGAGCTGCAGCGACGTGAACCTGAAGGGCT…
Seq_221464	Sobic.005G054700	Pit	Oryza sativa Japonica Group Pit mRNA for NBS-LRR disease resistance protein, complete cds.	Oryza sativa Japonica Group	GCAAGCTACATTTCCAGACACAGATAAACCAGCAAGCTGAAAGAAGCTGCATCATAATGTTTCTTCTGTAACGATTCCACTTATTATATATATACATGCCTCTCAATTCTCAAGTGGCAAACTGCATCAACATTCAACAGTAACAAAGATGTAAATCACTGAAAAAAACCCGAACCAATTCACATCACATTCTAGTCCGCTGTTATTTGCAATGTCAAATGTCTGACCGCCTCAGAACAACCCGCTGGCTAAAAAAATGGAATAAATTCACACACCACAAAGTATGCATTGCTGCTTCTTTCAGTGTAGGTCCAAAGTTTCCTTGTGATAGGTCACAGACGGGCACTCCACCTAATTACACCCTCAGTTGTTAAACAATGACAGGCTCTTCTTCGATTT…
Seq_221609	Sobic.005G125950	Serk3A	Nicotiana benthamiana SERK3A (Serk3A) mRNA, complete cds.	Nicotiana benthamiana	AATTTTTTTCCTGGACTAGAGATGCCCCATATATTCTCATTAACTAATGGTACTAAAGGGAAAATTCCGAGAAGAATAGAATTTATTCAGCAGCCATATCATACTACAAGGTGTCTAGATCAATCCATGCCATTGAATTTATTTGTTTATTTATTGTCAGCATACGCATGAAGAAAGCCAATGTCCTGATCCAGGGACTCATCATCATGTAGTCTTCAGCTTGTCCTGGATGATTGCAGTCACTCTTAAACCTGATGATCTGATGGTGCCGGCCAAGTCGTTCTTTGCAATATTTAGCTCGGTCAGATTCCCAGCAATGACAAGAGAGAGAACATCCAATGGAACCGTGCCGGTCAGCGTATTCGCGTTCAACTTCAGGAACTGCAATGTTTTGATGTT…
Seq_221678	Sobic.008G119600	Pi9	Oryza sativa (indica cultivar-group) putative nitrate-induced NOI protein (75-1-127BAC12.1), putative NBS-LRR disease resistance protein (Nbs1-Pi9), putative NBS-LRR disease resistance protein (Nbs3-Pi9), and NBS-LRR disease resistance protein (Pi9) genes	Oryza sativa Indica Group	CAAGTATTTGAGCCTAAGACGAACAAATGTTACCAAACTGCCCATTGAAATCAACAACCTCCATGAGCTTGAGGTCTTGGATATCCGGCAGACAAGGGTGCCTGAGAATGACACAAGAAATGTCCTGCTCCTGAAGCTGAGGCGATTGCTGGCAGATCGTGTTGATTCAAGTTCAGGAATGTGTGCCAAGTCATGCTCCGCTGTCCAGATTCCATTCCAAATCGAAAGAATGGAAAATCTGGAGGTACTGTCAAATGTCAAGGCTTCAGGGGATGGCAGTGACTTGGAAGAAATAAGAAAACTATGGCAACTGAGGAAGCTCGGTGTGGTTATCCAAGACAACTACAATCACCTCAGCAGGTTGTTCCGAGCTACTAGTGACCTTCATGAGTGCCTTTT…
Seq_221741	Sobic.007G140900	RFO1	Arabidopsis thaliana RFO1 (RESISTANCE TO FUSARIUM OXYSPORUM 1); kinase (RFO1) mRNA, complete cds.	Arabidopsis thaliana	GTTTGACAGCACCAAACATCGTGTGTTCCACCGTGTGTTCTTGAGTGCGTCTTCCCAGGTTCGCCGTGGTAATCATCCACCGGCGTTCCCCAACAATTTAAGCCGGGCCGCCGCGGAGCTGAGCCATTCCCACACGGAGATCGACTTCCCCCTCGCCACGCAAAGCCACCGCGGCCGGCCCCGTGCATCCGTCTCGCCCCTGCCGATCTACTCCCCGGCGGCAAGACGAGCGCTCCGGCGCCCCCAGGGAATGCGGAGCGATGAGGCGGCGCTCAGGCACTGACGTCGCCGGCCAGCGCGAGCTGCGCGGCGACCGAACCTGCCACCGGAAGCACGTTGAGGACGGGTAGACCCATCCACCCATCCTTCCTTCCATCTGCTAGTCGTCGTCGTAGGGGT…
Seq_221759	Sobic.001G517900	Pto	Lycopersicon pimpinellifolium Rio Grande-PtoR protein kinase mRNA, complete cds.	Solanum pimpinellifolium	GAAGTCCGACAGCTTCGCGGTGAAATCCGAGTCGAGGAGGATGTTGGACGCCTTGAAGTCCCTGTAGATGACCTGCTTCTCCGACGAGTGCAGGAAGGCGAGGCCGCGCGCCGCGCCCGTGGCGATCTTGAGCCTCCGGCTCCACGACAGCGCCTCCAAGTTTCCACCCCTTCTGAAGAGATGGTTTTCCAGGCTGCCCTTGGACATGAACTCGTACACCAGGAGCAGCTCCCTGTCCTCGCCGCAGTAGCCCAGCAGCCTCACCAGGTTGGGATGCGACAGTCTGCCCAGGAAGTTGACCTCCGACTGCCACTCCTGCAGGCCCTGGACGCTCTCCGGGTTGAGCTTCTTGACGGCGACGATGACGCCGGCGTTGCTCTTGGCCGGGTTGAGCGTGCG…
Seq_221788	Sobic.009G180900	RPG1	Glycine max NB-LRR type disease resistance protein Rps1-k-1 (Rps1-k-1) and NB-LRR type disease resistance protein Rps1-k-2 (Rps1-k-2) genes, complete cds.	Glycine max	GGAGCGGCAGTTGAAGGATACGGCTGCACGCAGCTGGCTTGCCAAGCTCAAGGGTGTCGCAGATGAGATGGATGACTTGATTGATGAGTATGCAGCTGAGACTCTGCGATCCAAACTAGAAGGTCCATTCAACCATGACCATCTGAAGAAGGTTAGGAGCTGTCTCTGCTGTTTTTGGTTGAACAATTGTTTATTTAACCATAAGATAGTGCAGCAAATAAGGAAGATTGAGGGGAAACTCGATAGGCTTATCAAAGAAAGACAGATTATTGGTCCAAACATGAACAGTGGGACCGACAGGCCGGAGATAAAGGAGAGGCCCAAAACAAGTTCACTGATCGATGACTCAAGTGTGTTTGGAAGAGAAGAAGATAAAGAAACCATTGTGAAGATGTTGCT…
Seq_222448	Sobic.006G252700	Pid2	Oryza sativa Indica Group cultivar Digu B-lectin receptor kinase (Pid2) gene, complete cds.	Oryza sativa Indica Group	TTGGAAAGTTACAAGTCATATAAATAAATTATGTGCATAAAGTCATTGCTGGAGAGGCTGCTGCAGTGCTGCAACACAAACACATTGCTGCAACAGTTTCTCCTACACAAATCTTGCAGCCTAAAGCCCTGTCCTCCAAGAACACAAACCACTGCCAGAACAAGAACACAAAGTGCTGCACAGAACTGAAAGCTTCCAGTATCCTTTGCGGCAGACAAACCAATAAATGCGAATTATTGATTTATTTCTATACGATGGAAGGCGAGACAGGCAATCTATAGTCATGGTGCACCGAAAATACAGGCATAAGCTATTTCCATCATTACTATCTGGAGTCAAAATGTTACCCGTTTTACCCTGCTGTATATCAACATGTCAGCGATGCAGGAGACTTGATTA…
Seq_222504	Sobic.003G202300	Pid2	Oryza sativa Indica Group cultivar Digu B-lectin receptor kinase (Pid2) gene, complete cds.	Oryza sativa Indica Group	GGCGAGCAAGGTGTTCGACGGGTGGTCGAACGACTGCCACTGGAAGGCGTCGCTGCTGCTCTGCTCGCGCACGATGACGAGGTTGCCGGACTCAAGCAGCTGAGCCACCGAAGAGGCGGAGGCGGCGGTCGTGTTTGAGGACCAGGCGGCCTGGCCAGAGCCGTCGAGAAGGCGAAGGCCCACCCGGCTACTCATCACCAGGACGCCGGAGGTGGTGTTCAGCGGGGTGTCGCGGTTGGCCACCCACAAGACGGCGTCCGTACCAGACGCCGTGAACCAGATCCCGAGGTACCTCTTGGTTGGCACCGTGGTCGACGGGGAGAAGAAACCCAGGGTGAATGAGCCACCGGCGGAGAGCAGCGTCTCTCCATCGGTGATGTTGCCCCCGTTGTTCAGCGT…
Seq_223658	Sobic.004G111400	PEPR1	Arabidopsis thaliana PEPR1 (PEP1 RECEPTOR 1); ATP binding / kinase/ protein binding / protein serine/threonine kinase (PEPR1) mRNA, complete cds.	Arabidopsis thaliana	TCTCCATGTACTCGTACACGAGCAGCTTCGTGTTCGCGTCGCCGCCGGATATGCAGCAGAGCAGCCTGACGATGTTGCCGTGGAGGAGACCGCCCAGTGACCTCGCCTCCGCTTCAAACTCCTTGTCGTTGTTCGCGTCGGGCTTCCCGTCCTTCCCGATCTTCTTCACGGCCACCGTCGACGACGTCGACTGACCAGCCCCGCCGTCGCCACCATGTCCTCCTGCCTTGTGGTTGTGGCTGCCGAGATGGATGCGGTACACCTTTCCTGACCCACCTCTGCCGATCACATTCTCCTCGCTAATGTTGCCGATTATGTCCTGCTCGGTAAAATCCAGAGTCCCGAATGGTATCATCTTCCACGATGTCACATGCTTGCGCCGCCGTAGGGCAAACCATC…
Seq_223874	Sobic.004G118800	Serk3B	Nicotiana benthamiana SERK3B (Serk3B) mRNA, complete cds.	Nicotiana benthamiana	TCATCCCGCATCGCCAGTTCTGCCCCCAAATTAATCCCACTTCCAGATCCATTGTTGATTTCTCAAGCTTCGCCTCTCCATATTACCCAATGTGATCACTGACTACCAATACCCTAGTCACGCGTCGCCATGACCACGCGCCCCTCCGTGCTCACGCTCCTCCTCCTACTCGCCGTCCAGCTCCCTCCCGCCGCCGCCGCCGCCAAGCATCGCCACGCGTCCGAATCCGCCCCGGCACCACCCGCCTCCTACCTCCTCGTATCGTGGGCAAGCAACCTCACGCTCCTGGGCTCCGCCTCCCTCCACCCGGGCGCCACAGCCGTCGCGCTCACCACCCCGTCCCGTGACGGCGTCGGTGCCGGGCGCGCCCTCTTCTCGGAGCCCGTCCGCCTCTTCGTC…
Seq_223878	Sobic.005G046250	R3a	Solanum tuberosum potato late blight resistance protein R3a gene, complete cds.	Solanum tuberosum	CTTCCCCACCGCCTAAAAAATGCCGTGACGGCCACGGCCTTCGCTTCCCGAATCTTTGCCCGTACCGCGCTTCCCTTCTCACAACTGGGCACGGCGTGGCCATCTTGATCTTCCTCAGCCACGACGACCGCGCCGCCCGTCCCCTCCGCCTCCACGTGCCTGCCACGACGAGGCCGAGGTCGACCAGGCTACTGCGCGCGAGAACGTGCTTCGACGGTTACCGGTTGCAGCAGGTGAGCAGGGACGGGCCCTGCCGCTCCTCCCTCAGCCCTTGCATCGTGCAGGGCGACCAGCTCCTCGACGGCGGACCGGGCGGCCGGCGGCGACACTGGCTCGGTCAGCCTCCGCCTCCGCGAGATCCGCTGCCTTCCCCTTCACTCTGTGTACTTGCTGACGTGT…
Seq_223996	Sobic.007G015700	Pikm2-TS	Oryza sativa Japonica Group Pikm2-TS mRNA for NBS-LRR class disease resistance protein, complete cds.	Oryza sativa Japonica Group	CAAGAGAAGAGAAGAGAGAGATGGCCGACCTGACCCACGGCGCCGTGGACTCGCTGCTGGGCGTCCTATCGGCGGCGATCAAGGACGAGGCGCAGCTGCTGAGCGGCGTGGAGGGCGACATCCAGTTCATCCGGGACGAGATGGACAGCATGAACGGCTTCCTCCTCCACCTCACCAAGTCCGGCGACGACCACGACGACCAGCAGCGCGCGTGGATGAAGCAGGTCCGCGACATCGCCCAGATCGCGCAGGACTGCATCCAGCTCTACATGCGCATCACCCCGTCCCACAAGGGCTTCTGGGGATACGTGCGCCACGTCCCCGTCCTCGTCAAGACCTGGTGGCCGCGCCGCCGCCTCGCCAACCGCCTGCGCGACCTCAAGGTCCGGGTGCGCGACG…
Seq_224074	Sobic.003G208700	RFO1	Arabidopsis thaliana RFO1 (RESISTANCE TO FUSARIUM OXYSPORUM 1); kinase (RFO1) mRNA, complete cds.	Arabidopsis thaliana	TCCCCCGGCGACGCGGCGGGGGGCGCTGGCAAAAGCACCCACAGCCCCTGCCACAACGTCACCGGCAACTACCGAAACGGCTACGTGTGCCGGTGCCAGGATGGGTACGACGGCAACCCCTACCTTGCCGGCGACGGCGGATGCCAAGATATCGACGAGTGCGCGCTTCCAGGAACGTGTTTCGGCGTGTGTACAAACAGTGATGGTGGGTACGAGTGCCGGTGCCCACGCGGTGCTCGTGGCAACCCCTACACGGCAGATGGCTGTGTCAAAACTTCTCTTGGGTTAAGTGTTGGCCTCGGAGTTGGCAGTGGAGCAGGTCTTTTGGTCTTGGCTCTTGGTTCAGCCTTTGTGGCTCGTGGGATCAAGAACCGTCAGGCAAGAATCCTGAAGCAGAAG…
Seq_224111	Sobic.006G192900	Serk3B	Nicotiana benthamiana SERK3B (Serk3B) mRNA, complete cds.	Nicotiana benthamiana	ACCCATTTTGACAGACCAAGCAATTTTTGTGATCATCTACGTAGATGTGCAAATAATCCTCGCTATTTCCTCACCTTCCCGTGAAGGAGGTGGAGGACAGGGAACAGAAACTGGAGTGCCCTCCGCCTCCGGTGAAGAGCACCCCGACATGCGCCAGCTCGATCTCCTGCCGCTCGCCGAAAGGCGGCCAAACGAACGCAGGCTTCAGGAGCGGGGGCTCCGGCGCGTCGGCTCCACCGACAAGCACCTGCACCGACGCCCGCATGGACGGCCTCTCCCTCGGGTTCGGGTGGCAGCACGCCAGGGCCAGCCTCACCACGCGGTCCACCTCCGCCGGGTCGAACTCGCCGCCCAGCGCCGCGTCGGCGGCGTCCTGCGCCCTCCCCTCGCCGTAGAGCC…
Seq_224225	Sobic.002G117100	Pto	Lycopersicon pimpinellifolium Rio Grande-PtoR protein kinase mRNA, complete cds.	Solanum pimpinellifolium	ATGGATCCGTCCGCGCCCCTCTTTCCCGTTCCCTCCTCCTGCTCCCCCGCGCCCCAAAAATCCGACCGGGCTATCCTCATGTCGGCGGCGGCGGCGGCGACCGCGACGCGCAAGCGTCCAGCGCCCGACGGCACGGACACCGGTGGCGGTGGTGCCGGCCGCAAGGGCAAGCAGGCGCGGATAACGCTGGGGAGCATCGGCGACTACGAGACGCAGGAGGCGATCGGGGCGGGCAGCTTCGGCGTGGTGGTCAAGGCGCGGCACCGCGGCACGGGCGAGGCGGTGGCCATCAAGTGTGCCCGCAAGGCGCCCAATAGCACCAGCAACCTCCGCCGCATCCTCCGCGAGGCCGGCTGCATGGCGGCGTGCCGCGGCCACCCGTCGGTCGTGGGCATCCGC…
Seq_224291	Sobic.003G079900	Pid2	Oryza sativa Indica Group cultivar Digu B-lectin receptor kinase (Pid2) gene, complete cds.	Oryza sativa Indica Group	AGCTTTCCTCCCAATGCGTCAATTCGTCGACTTCCTCTCGTGATCCAAAGAAGAAACAGAACTTGAAGTTAATCTTAATAGTTGCCTTGTCCTCTACAGCCAGCTTGATTCTTACGTCCCTTGTTTGGATAATGTACCGCCAGAAGAGAAAGGAAAAGCACATTACATTCAACCAAAAGTACAAAAGCTATGAATCAAATATTGAGGAAATATTAAAAGGATATGATTCTCTCATCCCAAAAAGGTACAAATACTCAGAGGTAAAGAAGATAACCGGATCTTTCAAAGATAAGTTAGGAGAAGGTGGCTATGGCACGGTATTTAAGGGGAATTTAGAAGATGGCGGGACGGTTGCTGTGAAACTACTGAAAGGATTAGAAGGAAATGGAGAGGAGTTCG…
Seq_224297	Sobic.001G408200	Pid2	Oryza sativa Indica Group cultivar Digu B-lectin receptor kinase (Pid2) gene, complete cds.	Oryza sativa Indica Group	GCGCGACGGTGACCTTCCCCCGGCAACGCCGCCGCCTCGCCCAACCCGGCCGAGGTCGGACGATTAAACTAAAGCCCGTTAACACCGGGGTTTTCTCCGCCCCCCGGAATCGGACCAAAGTCGGCCACACTGCCCAACCCAAACCTCTCTCCGCTCCCCGTCTCCTCCGCCCGCACTCGCTCGTCCGCGCGCAGGAAGGTTGACCTGTCGAGGGCCGGCGAGCCCGGTAAGTAAGAGTCAAAATGGATGGAAGTACTAGAGGGGGTGGACATTCTGAAGCATTAAGGAACTACAACCTGGGAAGAACTTTAGGTATTGGCACATTTGGAAAAGTGAAGATTGCCGAGCATAAGCTTACGGGACATAGGGTTGCTATAAAGATCATCAATTGTCGCCAAA…
Seq_224302	Sobic.001G249300	Cf-2	Lycopersicon pimpinellifolium leucine rich repeat protein Cf-2.1 gene, complete cds.	Solanum pimpinellifolium	CAACAACCTCACCGGCGGCATCCCGGCGGCGCTGGGGACGCTGCCGGCGTTGCGGGTCCTCGTTCTGCGCAACAACTCCCTCGGCGGTGCCATCCCGGCGTCTCTCGGCCGGCTGCACACGCTGGAGCGGCTGGACCTCAGGGACACGCGGCTGGTCTCCAAACTGCCGCCGGAGATGGGGAACTTGGTTAACCTCCGGTTCTTGGATCTCTCCGTCAACGAGCTCTCCGGTCCGCTGCCGCCGTCCTTCGCCGGGATGAGGAGGATGAGGGAGTTCTCCCTGTCAAGAGATCAGCTCTCCGGTGCGATCCCACCTCACATTTTCAGCAGCTGGCCGGACCTTACACTGCTCTACCTGCACTACAACTCCTTCACCGGAAGCATCCCTTTGGAGATCGG…
Seq_224341	Sobic.006G113800	Pikp-2	Oryza sativa Japonica Group resistance protein Pikp-1 (Pikp-1) and resistance protein Pikp-2 (Pikp-2) genes, complete cds.	Oryza sativa Japonica Group	GATAGTTCCGGCGAAGGATCGTCCGCCTTCACCTCTTGCCTGTTGGCTGTTGCTGCTCGCCCCCGTCTATAAATGCCGCGCGCCCACCTGTTGCAGTTGCTCCATCACAAGGCAGCTGCCGATTGCTCCTGCAGAGTGCAGAGTGCAGAGCATCGATCCATCGGCATTCGGCGCGGCCATCCCGTCCGTTCAGCCTCTACTGCTCAGACTACTTGTCGTTCCCCACATCTGATCGTAATCCTCAGCAGCGGCGCGTAGATCAGCAGCAGCGCGATGAAGCAAAAGATCGTGATCAGGCTGAGCATGGCGAGCGACAAGTGCCGGTCCAAGGCCATGGTGCTGGCAGCCAAAGCAGATGGGGTGAGCAAGATGGGGATCACCGGCGACAGCAAGGACCAG…
Seq_224750	Sobic.003G058001	Ve2	Lycopersicon esculentum verticillium wilt disease resistance protein Ve2 (Ve2) gene, complete cds.	Solanum lycopersicum	GCTAAGTATATCTCCCCTATCAGCAGAACTCAGAAGCTTACTTGCAACAGGTCTTAGCCAACCAAAGAGCCTGCTGCCGATATGCCCACCGCCACAGCCATGGCCCGTCACGGGCCACCACAGGCAGTAGTGCTGCACCTCCTGCTACAAATCAACCTAGTGATGGCCGGTTCATTCAGCAGCAACCACACTGCAGTTGCCGTGGCGCAGGTCCCATGCCTGCACGACCAGGAGACAGCGTTGCTTCGGCTCAAGCTGTCATTCGCCGCCACGGCCGACTCCATCACGGCGTTCCAGTCATGGAAGGTCGGCACGGACTGCTGCGGCTGGGCGGGAGTGCACTGTGGTGACGCCGACGGCCGCGTGACTTCACTCGACTTGGGGAACTGGGGTTTGGAG…
Seq_224907	Sobic.010G242300	Pid2	Oryza sativa Indica Group cultivar Digu B-lectin receptor kinase (Pid2) gene, complete cds.	Oryza sativa Indica Group	ACGGCGTGCCAGGACTGCGGGTACATCCGCAGCCTGTTCCTGGGCGCCCGGATGGCCGAAGAGCTCCGCGCCGTGGAGCAGGAGATCGACATGTTCATCCGCCTCGTCCCGCTTATCGCGCTCGTCGACACTACACATGAACGCCGGGTCACGGCTGCTGAAGCAGTGCCAGTTCTAATCATGAATGGGTCAAGCCATCATCACGTCAGATTTCCAAGAAGTGTTGAGGACTTCACCAGAATACAAGTTCAAGGAGCTCCTAAAATTTATAATGTTGCAAAACAATCGTTTGCAGGAGCAATGGACTTGCAAGGACAGAAGATTCTGGACACTGGAGAACTGTTGGAGCTTTGTACCCATACTGAAGAGAGTTGCTCAGGATTCAGAAAGTTTGAATTC…
Seq_224908	Sobic.010G239700	Pid2	Oryza sativa Indica Group cultivar Digu B-lectin receptor kinase (Pid2) gene, complete cds.	Oryza sativa Indica Group	CGCTCGTCACGGCGTGCCAGGACCGCGGCGGGTACCTCCACCGCCTGTTCTGGGGAACGTGGATGGCCGACGAGCTCCGCGCCGCGGAGCAGGAGATCGACATGTTCATCCGCCTCGTCCCGCTCATCGCGCTCGTCGACTCTACACATGAACGCCCGGTCAAGGCTACAGAACGTGTGCCAGTTGTGGCGGCAAGCTGTTCAAACCTTCAAACAAGGACTCAGACAAGAGTTGTGGAGTTTACAGAAATAAGTGTTCAAGGAGCCATTGTACCTTGTAATTGTAAAGAGATTGCCCATGATTCGGGAAAGGTGCATTTGCGAGAACAGAAAATCATGGATGTGGAAGAATTGGTGAAGCTTTGCACACGTACCCAAGAGAGATACCCAGGATTCAAAA…
Seq_225002	Sobic.001G270900	XA1	Oryza sativa mRNA for XA1, complete cds.	Oryza sativa	GTGCGATACATCACCAACTCGAAGATGCTGCTTCAGCTCAAGAAGCTTGTGGAGGTCATGTACCAAGGCTACCTTGTCCTGGACACCAACAGGTACAGGACTGTAAACGAGGTCAGCAGCAGCTTCAGTGAATTGTCCTTCACCACTTGTATTAAGCGACTTTTTACTTGTGTGGATCATGAGCTTCAGCCTACACTGGATAATTTGGAATCTGTTCTTTCAAATATGAAAGAGTTTGTATTTCTTCTCCAAGGATGCGAACGCATGTTCCGCAGCCCCTATGACTCGTATCTTTACATAGACAACTTCATGTTTGGTCGTCACGTAGAAAAGCAGCAGATTATCAATGTCTTACTGCAAGACAATCCTCCTCCCTTCACTCCAGCAGTGCTCCCAGTG…
Seq_225059	Sobic.006G222800	Lr1	Triticum aestivum Lr1 disease resistance protein (Lr1) gene, complete cds.	Triticum aestivum	TTGTTCCCTGAAGATTATGAATTTGGCAGTGATGAGCTAATTCATTTGTGGATGGAACTAGATATTTTCCACTCATCTACTCAGAACAAGAGATCTAGAGATGTTGGGCTGAGCTATTTGATTGACTTGGTTAACAACGGATTTTTTATAAAGAATGAGAAAGGCGATGGCACTTCTTATTATGTCCTACATGACCTGCTGCATGATTTAGCGGTTAAAGTTTCACCACACGAATGTATTACAATACCTAGTTCCAATGTCGGGTCCATACAAATCCCAACTTCAGTTCACCACTTGTCCATGATCATAGATGACAAAGAAGTTGAGAACAAAGTGAATTTTGACAACTTCAAAAAGGAACTAAGAGAACTGGACAAGAGACTAAATACCGAAAACCTA…
Seq_225233	Sobic.007G119800	Lr34	Triticum aestivum chromosome 4 clone BAC ABCT5; BAC ABCT33 map 4A, *** SEQUENCING IN PROGRESS ***, 7 ordered pieces.	Triticum aestivum	GGGAGAGAGAGAGAGAGAGCGAGCAAGAAGAAACTCCCCCGTAGTCCGTGGCCCGGCCTCTCGACCGACCGGTCCGGGCCCGATGGAGCTCCTGAGCGGCGGCGCGCTGGCGTGGCAGCAGTACCGCGCGCTGCTCCGCAAGAACGCCACGCTCACCTGGCGCAACCGCCGCTCCGCCGCGCTGCAGCTCTTCTCCTCGCTCGTCTTCATCTTCCTCATCTTCTGCATCGACCGCGCCGTCCGCTCCAGGTTCTCCAGCACCACCGCCTACCGCAACGTGCCGGACCCGGAGCCGCTCATCGCGCCGCCGATCCCGCCCTGCGAGGACAAGTTCTTCATCAAGTCCCCCTGCTACGACTTCCTCTGGAGCGACGGCGGGAGCGACCGCATCAGGGGCCT…
Seq_225352	Sobic.009G002400	PGIP	P.vulgaris pgip gene for polygalacturonase-inhibiting protein.	Phaseolus vulgaris	ATCAGCATTCATAAATGGAAACATTTTATGCCAACTGCTGAAAGCATTATGAAGCAACAATATATTGTTGGTAGTTCAAAGCATCCTAGTACAGATTTTTGTAGTTGCTCTCGATCCATGCATCCTGGGATCCATGAAGAACTAACCTTAACAGTTGATTCCAGGATTACAATTATTACATGCATATATGTTATTTAATTTGTTGGTACCTGTAGGTACCTTGCTTCACTTTCATTATATATAGCACTCTTGGTTTGGTATTGTACTACTATATATTTCACTACTCTTGCTGCTTCTTACGTGTGAGCTTCTTCTTACGTGGTTTAGCACTCTATGATGAGCTTCTTCGTCATACGTGTAGAGCTTCCTCCTCCTCTCATCGATCGATCGATCAATGGA…
Seq_225599	Sobic.003G113800	RFO1	Arabidopsis thaliana RFO1 (RESISTANCE TO FUSARIUM OXYSPORUM 1); kinase (RFO1) mRNA, complete cds.	Arabidopsis thaliana	AATAGATCTGCTGCTGTTGGGGGCATTTCGGCCGCTGCGTCGCGTTGGGAGCAGTATCCTGCTTGTGCCTGCGTCCCGACAAGCGGAAAGAAGAGGCGGGGGAGGGAGGTAGAAAGGGGGAGGAAAAGAGGAGGGGAGAGGAGAGCGAGCAGCCACAGAACAGGGAGGAGGCGGAGGAGGGAGAAGGCGAAGAGGAGGAACCAAATCTCGGAGGGGAACAGAGAGATTTCTTTGGCTGAGGAAGAGGGTGGGGCGACAGGAGGAGGTTAGAGGTAGCCCAATAGATCTGCTGCTGTTGGGGGAGTTGATGCAAAGCTGAGTTGCTGCACGTTGGCTTTCTTCAGAGATGGCTTCAGCTGGTGTAGCCCCTTCTGGGTACAAGAACAGCACCAGCACCAG…
Seq_225806	Sobic.002G063700	Pikm2-TS	Oryza sativa Japonica Group Pikm2-TS mRNA for NBS-LRR class disease resistance protein, complete cds.	Oryza sativa Japonica Group	CGCCCGCGCCACCGCCATCAGCGAACGCCACGCGCGTTACGGCGTCTACCACACTCTGCTGCACCGCTCCCCTTCTCGGCTACCTGCCCCCAGGTCAGCGTTCGCTTCTGCTAATAACGACGTTGAGAACCAGATGGCGGCGGTCTGGATGGCGAGGAGCCCTGAGCTCATCAAGACGCCGGCTCCTGTGGCAATGGAGGAGGACATGAAGGAGCTTCAGATATGGATGGCTAAAGAGGATCCTGATCCAGCTGTTCTTTCCATCGTTGGATTCGGTGGAGTGGGAAAGACCACCATTGCCACCAAACTGTACCGAGATTTCAGCAATAAATTTCACTGCCAGGCGTCGGTCACAGTGTCGCAAAACTATGATGAAGATCAAGTCCTCAGGGATATTCT…
Seq_225818	Sobic.005G116700	EFR	Arabidopsis thaliana EFR (EF-TU RECEPTOR); ATP binding / kinase/ protein serine/threonine kinase (EFR) mRNA, complete cds.	Arabidopsis thaliana	AGACGAGGAGGCAGGGAACGTCGACGGCTAATTCTGTCTTACATTGCATACACATAACATCAGTACCACAATATGTTCCCTGCTTATTCATACAATCACCAACCCAAGTTTGCTTTTGGTATGGTTGTAGGTGTAAATATATATTTTCATACATTCAAGAAAATATTATTATTGGGAGCCAATATTTCCGCAAAGCTGAAAAGGCGGCCATTTAAACTGACGTTCTATGTATTGCAAACCATTCCTGAGCCTAATGTATACCACCACTGCATAGTAACTTCTTTTAGTTACCTTATACGATGGTGTTCCTTATCCTGCGCATCTCAGCTGCTGCATCCCTCATGCTGATTCTTTCTGTTGGTGCATGTTTGCTACATGATAGTGCAAGTTTTGTGATAG…
Seq_225925	Sobic.007G141200	Hm2	Zea mays Helminthosporium carbonum susceptibility1 (hm1), mRNA.	Zea mays	GTTTATTTGACAAGTCTTATAAACGAGGAACTTCCCATTAATTCTGTCCTTTAGGGAGAAGTCAAATGATTTAGAAGCATTAGTTTTGGTAACAAGTGTTACAAAATATCAGACAGAGCATCAGAGTCCAACTGGCAACTGTCCATACTGTATATGAGTGGCGACTGTCGTTGTTTCTTGTGGATTGCTATGATCTTATTCTTATGGCACAATGTGATTTGTGAATCGTTATGTGATGATTAAGCAAGGGCAGCCATCACTGTTCTACGCAACTGGGCTACCAAACATGAACAGTATTGAGTTTTTCATTTTTTTTTTACAAAGGGTCTTGTACTTATACAGGCTAGCGTCTTGGCCCATCTGGTAGTGCTACTCCAAAAGTCCCGATACTTTGCAAGG…
Seq_226061	Sobic.003G280300	PEPR1	Arabidopsis thaliana PEPR1 (PEP1 RECEPTOR 1); ATP binding / kinase/ protein binding / protein serine/threonine kinase (PEPR1) mRNA, complete cds.	Arabidopsis thaliana	TCCAAAGGACTCGAGCAACTCCCGTCTCGCCGAGTCCTACTCGCCTTCTTGGGTTCTTCCTCCCCGAGCAGCCACTTCCATCTCTAACCCTACAGCGACGACGCGAGCGAGGCCATGAGGGGGAAAAAGCCGATGAAGGAGCTCAAGCTCTCCGTGCCGGCGCAGGAGACCCCCGTCGACAAGTTCCTGACGGCAAGTGGTACGTTCAAGGACGGTGAACTGCGGCTCAATCAAAGCGGTTTGCGGCTTATCTCCGAGGAAAATGGGGATGAAGATGAATCAACAAAGCTGAAGGTGGAAGATGTGCAGTTATCAATGGATGATCTTGAGATGATTCAAGTCATTGGCAAAGGAAGTGGTGGTGTTGTCCAGCTAGTGAGGCACAAATGGGTGGGGACA…
Seq_226152	Sobic.001G425700	ER - Erecta	Arabidopsis thaliana ER (ERECTA) (ER) mRNA, complete cds.	Arabidopsis thaliana	AGGTGTTGAAGTCCTCCTCGCCCACCACCGCACGCGGACAAAACCGCCCTCCTCACGGCCTCGCCAGTCGCCACACTCCCAGCCCCCTTCGCTCGCGCACACGGCACACCACCAGTCCAATTCCCAGTACACTGCTCTACGCCTCACTCAGTACAGCAGCGGCCAGCGGCTGCCTAATCTCTCCAGCCCTTTCGTCCCCTTGCCTTGCCACGCCGCCCACCGCTGCCGCATCATCCGCCCGTTGCCGGCCGACGTCGCCTGGCCCGCTGCTTCCGCCCCCATTCGCCGCCGAGCCCCGTCCCAGATCGCCGCGGCGCTTCCTGCCAGCGTCGGCGCGGCGCAGGGTTGGAAATCTATTTGACCACTCAGTGGGTGGCTTCATGTTAAATCCATTTCTGG…
Seq_226196	Sobic.003G214900	Serk3A	Nicotiana benthamiana SERK3A (Serk3A) mRNA, complete cds.	Nicotiana benthamiana	GAATCTTTTAAGCCTAATTAGTCGGACACTAATTACCAAATAACAACAAAAATCGCTACAGTATCGTTTTGTCAAAAAATTTGGAACTGAACCGGCCCTTGGAAGTTAGAACAAGAAAATCTTATGGAATGAAGCCCTAGGCGTGCCGATCAGCCAAGTAGCTTGTCTCCAAGAAATGATGTGAAAGCAATGTAGCTTCGCTGTCAAGCCGTGAGTGAAGGGCAAGGCATTTCATCATGATATAGGCTTGAGTTTGAGTGACAGACAAGAGAGCGGCAACAAGATGTTGGTGGTGGGGCACGGGATGAAGCCATAGGGGCCTGCCGATGATTAGACTCGTCTTGCTGCTAGTTTGGAGCCAGTTTGAAGCATCACGAAGGGGGAAGAGACGCTGAAGAA…
Seq_226209	Sobic.003G010500	Serk3A	Nicotiana benthamiana SERK3A (Serk3A) mRNA, complete cds.	Nicotiana benthamiana	CCGCCTCCGCCTCCGCCGCCGCACAAAGGGGATCAGTACCAAAACTGGCAGCATAATGCCCCTCCACCACCACCTGACCATGTAATCAAGATTAATTCACATCCTACCCCTCCGCCTCCCCCGCTTAATGTACATAGCAGTGGCTCCGCTTCGAATCACTCAGGTGGTGAGAGCCGCCCTCCACTGTCGCCTGGAACTGCCCTTAGCTTTTCAAGGAGTACATTCACTTACGAGCAGCTGATGACGGCAACCAATGGGTTTTCTGACGCTAATCTGCTGGGGCAAGGCGGTTTTGGGTTTGTTCACAAAGGAGTGCTACCAAATGGCACAGAGGTTGCTGTTAAGCAGTTAAGAGATGGAAGTGGCCAGGGAGAACGCGAGTTTCAGGCAGAGGTTGAG…
Seq_226217	Sobic.008G174100	Pi-ta	Oryza sativa (japonica cultivar-group) pi-ta protein (Pi-ta) gene, complete cds.	Oryza sativa	TGACCCAGAGCCGGCGGCCGCCGTCCCTGCCCGCGCCGGCGGCTGCACCGGACGTGTAGTATGGGAGTGATGTCAGTACTGGCCGCACAGGAGTAGTTTGTCTGGTGTCTTTTTTGAGGGGAGGAGTAGTTTGCTCTGGGATGCTGTCGTGCCGTTGCCCGTGCCGGTTCTGTTTCCGGCCCGGGGCCTGGGCAGGTGAAGGCGGATATTGATTTTGCTGATATCCCGCTGTTGTCATGCTACTCTGACTACTCTGATCATCCTCACCACCAACGATCAGCCTCCCCAATTGTACGTTGACTTTCTGACACCCAGCATGCACCCTGATGGCATTTCTGAATGCCAATTCGGCAGCCCTTGTGTGGGATTCCTCAGGACCAGCACCACCAATTTTTGCAG…
Seq_226379	Sobic.001G037800	Hm1	Zea mays Helminthosporium carbonum susceptibility1 (hm1), mRNA.	Zea mays	AAGAGGTTGACCAGATCCGACTCCGAGAGGCGGGTACCAACCGCATCCCTAGAGATCGAGTGTCCCGTAGCCACTCCACGGATACACTCTCACTCTCGACCAGACCTCACTACCTCAGCTCAGCTCAGAGGAAGGACGGACGGCGAGATGGCAAGCGGGGAAGAAGGCAAGGGGGAGACGGTGCTGGTCACCGGCGCCAGCGGCTTCATCGGCTCGACCCTCGTCCGCCTCCTCCTCGGCCGCGGCTACAGCGTCCACGCCGGCGTCCTCAACCCCGATGACAAGGCGGAGACGGAGCACCTGCTCGCCCTGGCCGCCGGCGCCGGCGAGGGCCGCCTCCGCATCTTCCGCGGCGACCTCCTCGACGGCGCCGCGCTGATGGACGCCGCGCGGGGCTGC…
Seq_226420	Sobic.003G269300	Xa13	Oryza sativa (indica cultivar-group) cultivar IR24 disease resistant allele XA13 (Xa13) gene, complete cds.	Oryza sativa Indica Group	CCACTGCAAAAAAAATGCGTTAGTCACAAGCATATGCGTTCATTAATCATCAAGACCCCAAAGCCAAAATTAGGGCCTAGATGCGTTCAGTGTGCTAGGATCTAGACTGCCCGATGGAGGACTAAATGCCTTGCCAGTGAAGCTACTTCGTAGGAAGGTTCCTAGAGTTGTTCTCAGTTTGAAACCCATCGATCCGGAGTGGGAAATGGGTATTCGCTAGTGGGGACTTGACTCTTGATGGCTTAAGGTAGCATATAACCGAGTCTTGGTGACTTTGTGGGGTTTCAACATGGATTAAAGAAACTATTTGATACCATGAGAAAAAATCCGATTGTCTCTTGTCCATCTTTTAAATTCTTGCATTTCCATTCTTGTTCCAACTTTGTTTTCTTTGTTTGG…
Seq_226425	Sobic.008G130500	Pid2	Oryza sativa Indica Group cultivar Digu B-lectin receptor kinase (Pid2) gene, complete cds.	Oryza sativa Indica Group	CGGACGCTGTCTACGCTCTGGCGCTCTGCCGCGGCGACATCGTCAACGACTCCGCCTGTGGCGGATGCGTGGCCCACATATTTGACATGGCACCACCACTATCGCAGCAGCAGTGCTACTTGGGCATGTACTACTACGGTGATAGTTGTGTTGTCGCCTACTCTATGGACGATATCCTCACGTCCTCCAATACGACGCCATTCACGAGGTGGAACCTGGGCAACTGGGGCAACTGGAGCACCAACAACATCACGGGCGACGCCGATGACGTTGCCCTCACCGTGGGCCTCCTTAACGAACTTCTGGTGAAGACAGTGCAAACGGCGGCCAGCACGACGCCGGGGCGGTTCACAACGGGCGTCATGAACAGCCCGACGATTGTGTTCTACTCCATGGCGC…
Seq_226477	Sobic.003G213000	Xa13	Oryza sativa (indica cultivar-group) cultivar IR24 disease resistant allele XA13 (Xa13) gene, complete cds.	Oryza sativa Indica Group	GCACACGCGCCGCCGCCAGCGCGAGCGCCGCGACCAGGGACTCGCGGTCCGCTGCGGCGCGGCGGCCCTGGCCACCAGCCCCGCCCCGCCACGCCCCGGAGCCTCCTCACGCCTATAAAGTGCGGGCGTACCCGCTTGCCCCGAGAACCGCAACCACCTTTCCCAGTGCTCGCCTCTCGTCGTCTAGCCCCGGCCCCGTTCCGAAAGCTCCGCCCGCAGCTCGCGCATCTCATCAGCCGCGCGCGCCACCACCCACCCCCGGCGACCGAAGATGATATCCCCGGACGCAGCCCGCAACGTCGTCGGCATCATCGGCAATGTCATCTCCTTCGGCCTCTTCCTCTCCCCAGCGCCGACGTTCTGGCGGATCTGGAAGGCCAGGGACGTGGAGGAGTTCAA…
Seq_226504	Sobic.002G119400	Pto	Lycopersicon pimpinellifolium Rio Grande-PtoR protein kinase mRNA, complete cds.	Solanum pimpinellifolium	TTTTTTACACCACCAATTAGTTTCATTCAATCTATCATGCAATATATCTTACACTTATTTGGTGTTTGAGATATCAATATGTATTTCTACAAACTCTTGGGTGTTTTAGACGTCCATATCTATCTATATTTCTTAAACTTGATCACAGTTTAAGAATTTTAGCTTACAACAAAGCAAAAGTGAATTGTGATTCGGGAGGAAGTACATGATAACCAGCATGGAAGGCAAGGCAGCAACGCCACGCCAAAGGCACAAAAAAAAGTCCAGATCATTCTGCATCTATTCTTCAAGCAGCCAATTCTGAAACCTACAAACAGTTGGTATTGGTAGAGAAGGTAAAAAACAACTTCGAGCCTACTGCATATACCATTGTGTGGCGCCAACATCAAGCCACGAACT…
Seq_226691	Sobic.001G235900	Lr34	Triticum aestivum chromosome 4 clone BAC ABCT5; BAC ABCT33 map 4A, *** SEQUENCING IN PROGRESS ***, 7 ordered pieces.	Triticum aestivum	CGCATGGTAAATTTTAATAAATGTATAAAAGAACTGCGTGTCCATATATACACTAGGAAAATATTGGTTCATATTCCATTCTGACGGGCTTATGGACAACAATGGTGATACAAAAATCAGTATATATCTGTTTTGCTCTACTCCTGAGTGCAACTTCCTATATGAGATGTAGCCTTCTTTCATGTATATATACCAAATAGAATAATCCAAGGTGTACAATAAGAGAAAACTCTACGTTATCCCTCTTGTCCATAAAATGGCAAGACATCTATTTCAGCTTTAACATACTAAGAAACGCAACAAGCCGGAAGAACACACCCTGGAGCATAATAATGGTGATGCAAAGATTAAATTCGTTGATATCATAGCCCCCTTGGAGCAATGCTCCACATCTAGTGA…
Seq_226807	Sobic.003G006100	Piz-t	Oryza sativa (japonica cultivar-group) Piz-t (Piz-t) gene, complete cds.	Oryza sativa Japonica Group	GAGCTGCCTGCAGTACGTGACCGCGTTCCGCGACGAAAAGGAGATCAGCAGGACAAGCATGGTCAGGCGATGGGTCGCCGAAGGGCTTGTAGGCAAGGAGCCAGGAGGAGGAGGGAAGACCACTCCAGAAGAAGCAGGCGAGCGCTGCTTTCGTGAGCTTCTCTTTCGAGGCTTCATTCGTACTGCTCGCCGGAGCGATGCTGGCACCATCAAGAGCTGTGTCATGGATGACGCAGCCCGTGAATTCATCGTCGGCATCACCAAAAGCGAGAACTTCGTGGCTGACCTGCCGGCCCACCTCGATCGCCAGCTCAAGATCCGAAGCATAGTTAACCGTCCTCGCTCCATGTCGCTGCTGTTGCCACAGCCGCCAAAGTACACGCTGCTTCGCCGCTGCTG…
Seq_226936	Sobic.003G267700	Lr34	Triticum aestivum chromosome 4 clone BAC ABCT5; BAC ABCT33 map 4A, *** SEQUENCING IN PROGRESS ***, 7 ordered pieces.	Triticum aestivum	TTTTTTGGTACAATACAAAATCATGCCTTCTTTGCGTATACACACAGCAATCCGCCGTTCAAAATTCAACCAAATGCTTACAGCGAATGATAATTACAAAGAAATGTTAACTTCTCGAATTCTTCTTCAAATCCCAATGACTTCATACTACCCCCAAACTACAGAAACAATAAGGAGAGCTAAGAAAGATGTATAAGTATAATGTCTAATAATCAGAAGAAATTCTTAACCTAGGTACTATGATGAGGCTGAACGAAGTTCAACTAGAGAAGCATAGAATCCATCTTTGATATTCATCAGTGCCTCATGTCTTCCTTTCTCCACTATCACGCCATCCTTGAGAACAGCGATAATATCAGCGCTTTTGATCGTCGAGAGGCGGTGTGCCACAATAACTGT…
Seq_226944	Sobic.002G310800	RPG1	Arabidopsis thaliana RPP13 (RECOGNITION OF PERONOSPORA PARASITICA 13); ATP binding (RPP13) mRNA, complete cds.	Arabidopsis thaliana	AAGGGGCGTCGGGTGTGCGTTTTAGGAGTTCGAGGATCTACTTGACACATCGTACAAAGTTCGAGGGCCGGCCGTGTATTTTACCGTGAGAGCAAGTCTATGTTTGAGGTCAACGGCTCCTTGCATTTATAAGGCACCCTCCTTTGCCCAATGCTTAGCAGTTAGCATCTTCCTTGCTATCTACTTGTATCACTCAACTAGAAGCAGCTCTCTGGATTCGTAGCGCCCGCATGCAGCTCCAGGATGGCGGAGGCCATCGTTGGTCCGCTAGTGGGGAAGCTCCAGGAGATGGCGGTGAGCGAGGCGAAGGCTCTGGTGGCAGTGAACGACGACATCCGCGGCCTCCGGGACCGGCTCATGTGGATGCAGGCCTTCTTGCGGCATGCTGATCCACGGCGA…
Seq_227120	Sobic.007G200200	Pid2	Oryza sativa Indica Group cultivar Digu B-lectin receptor kinase (Pid2) gene, complete cds.	Oryza sativa Indica Group	GTAGAGAGTTACAACTTCACTGGAAAAATATGACATTAATTTGCGAAAATTATTCTTCTTATGCTATCTGAAACATACTTCCAAATTAGAAATCAGATAAGGTACAGAAGCAATTACAAAGCCTAAGTGTACAATATGGATGTTCCTTATATTCATTACTGACAATGATACATTTCATCTTGGACCAGATAGGATTGATGCCAGTGGTGGAGCTGAATATGCTGATTGATCACTTTGAACAGAAAATACTGGATCTGAACTGAAGAAATTGTAATCTATGGAAGTTTCTACGGTCATTGTACCTTCCAGTACCTTGACTACCGTTGACATCAATGGCCTTCGACTGCTATCATGTTGCAAGCACCACATTGCAAGCTTCATCATCTGAATAACTTTATC…
Seq_227179	Sobic.004G314000	PGIP	P.vulgaris pgip gene for polygalacturonase-inhibiting protein.	Phaseolus vulgaris	TCGTCAGTCGCCGCAGCCTCATCGCTCGGTCCCAGAAGAGGCGAGGACCCCAGCGGCCAGCACCCCCTCCCGCTCGACAGCTCGCACCCGCCATGGAGCCCTCGCCGGAGCCTTCGCCGCCGGTCACCACGGCCACCTTCCCCGCTGCCGGCGAAGGACACGAGACGTACCCGCCCACGGTGTCATCCTCTCTATTCCCACTTTTCCCCCTCTCCGCCTCCACCTCCTCCGCTCCCACCACCGAATCCCAGTGGCTTTCAAACCCTAGCTTCTCCTTTGATGCCTCCTCCCTGAACATCCCGGCTACCACCTCCTCGTCGCTCCCGCCGCCGCTGAGCCCCTCGTCCGATGAGGACACGCCGCTGCAGCCCGCCCCTGCGAAATACGAGCTGGTGCCTT…
Seq_227240	Sobic.003G291700	Cf-2	Lycopersicon pimpinellifolium leucine rich repeat protein Cf-2.1 gene, complete cds.	Solanum pimpinellifolium	GTGGAGTGCATGTGAGACGCCTCGGGAAGAACCCCGGTCTTGCGATCCCGCAGCACAGGAGCGCACGCCGGCGGGTACCGGAGCCTCGGTGCAAAGGCCGGGGTTGTCGCGGAAGCTGTTGTCGTAGGCCGCCGTGGCGAACCCGATCGGGACCTGGCCGCTGAGGTGGTTGAAGGACAGATCGAGGGAGTTGAGGTTTGGCTTCACAAGCTCCGGAGGTATCGCGCCGGAGAGCTCGTTCGACGAAAGGTCAAGCACGCTGAGCACCGGAATGGCGCCCAGTTCTGCCGGTATCGCGCCGCTGAGCTGGTTCCTGCTCATGTCCATAGACACCAACTGCCTCATGTTAGCAACGCTCTTGGGGATCGCGCCAGAGAGTTGGTTACGCGACAGGTTCAG…
Seq_227254	Sobic.003G096750	Pid2	Oryza sativa Indica Group cultivar Digu B-lectin receptor kinase (Pid2) gene, complete cds.	Oryza sativa Indica Group	CAATGAGATTGCTTTGGGCATTGCCAGAGGTATCAACTACCTGCATCAGGGGTGTGATATGCAGATTGTACACTTTGACATCAAGCCAGAAAACATCCTTCTCGACAACAACTTCATTCCGAAAGTTGCTGATTTTGGGCTGGCAAAATTGTGCCCAAGAGATGACAATTTTGTGCCAATGAGCGCAATGCGGGGAACAATAGGGTACATAGCTCCTGAGATGATATCTCGGTGTTTTGGCACCATATCCAGCAAATCCGATGTGTACAGCTTTGGGATGCTACTACTGGAGATGGCGGGTGGGCGTAGGAACGCAGATCCGCAAGCAGTAAGCTCAAGCCAGGCATACTACCCATCGTTGGTGTATAGCCAGTTGACCAGACAAGAAGCAGGCGAGAT…
Seq_227266	Sobic.009G058900	xa21	Oryza sativa Indica Group Xa21 gene for receptor kinase-like protein, complete cds, cultivar:II you 8220.	Oryza sativa	AATTAAGGCAAAAACACACGTCCGCTGCAGCACAACAATGTGTCACAGAACACATATGCCCCCTGTAGGAGCTCTCAGCTCCTCACTGCCATTGATCATTGTCTTCTTCTCCTCTCTATTGGCACTCGCTGTGCCTTCACTAGGTTCTACACCTCTTAGTCGTGAACCTAGCAACGACTCGGAGGCACTCCTTTGCCTTAGGAACCACCTCTCAAACCCACCTGCCAGATCACTCCCACCGTCATGGAACAATGATTCCGCCCAGTTCTGCAGCTGGTCCGGTGTTACATGCAGCAAGAGACACTCATCATCTCGTGTTGCTGCACTGGACCTCGAGTCGCTCGGCCTCCATGGCCACATACCTCCTTGCATCGGTAACCTCACTTTCCTCACAAGGAT…
Seq_227338	Sobic.009G257200	Pid2	Oryza sativa Indica Group cultivar Digu B-lectin receptor kinase (Pid2) gene, complete cds.	Oryza sativa Indica Group	TCTGCTTCTGCTAATTCCCGGGAGGGGCCATCTTACTGTTCGCCACCTCGAATTCTCAGTAATTTCTCCTTTTAGCCAGGCAGCCGGGCCGTGCTCGAGAAAATAAGGACACCAGCAGCACGAAAGGGGAAAAAGGAGGGCAGAAATCCCCAATCGCCCCCACTTCGATCCACTCGAGCCCTAACCCCGAATCTCCCCGGAGGATCAGACTGAATCCATTCGATTCCCTCATGGCAGGCTCCGTCTGCTTCTGCTAATTCCCGGGATCGTCTCCACCGACGCGGCTGCGCCCACAGCTGCCGTCACAGCCATGGAGCCGCGCATCGGCAACAGGTTCCGCGTCGGCCGCAAACTGGGGAGCGGCTCCTTTGGGGAGATCTACCTCGGCACCAACGTGCA…
Seq_227449	Sobic.010G052800	Serk3A	Nicotiana benthamiana SERK3A (Serk3A) mRNA, complete cds.	Nicotiana benthamiana	TTTTTAATTCAATCTTCTCATTGTATATTGGTATATCTGCAAATTAAAGGACGAGCATTCTGGGCAAATTAGTATGAGGACAACATGATCAGAGAAATATACAAACATCTGGAAAACATGTGCATTTTCTATGCGGTGCATACAAAAAGCACTTCGCATAACAACTATCTCAAACCCCCTCGCTCTTCCTTACTCTCTCAAAAGGGAGAAAAAAAAACTTCTTACAGAAAACAATGCCTATACAATTTCCATTCATGTCAAACCGCACAAACCAATCATCAATACCACAAATATGCATTCTACCATCGCCTACAGTACCAATATTATATCATATTTCACGCCCCAACCAGTTCTTGATCTTTCTTTGGCGCAGAGTCTGTGCTCCCATCTGGGGTTGGT…
Seq_227455	Sobic.001G122832	Pto	Lycopersicon pimpinellifolium Rio Grande-PtoR protein kinase mRNA, complete cds.	Solanum pimpinellifolium	CTGCTAATCACAGCTCAGATTATTTACTCATGTTCTTTGGTCTGTACATACTATCTACTACATGGTTATAATCAGAGTTTGAGATATGAGCTGCAAAATTCTGAACACAGTTTTCCTTTTATCTGGAAGCCAAAGATGTACATTGTTATAATCAGAGTTTGAGATCAGAGCGAGGATTCACATGCAACGGAAATGAATTTCCTGGGGCCAAAGACACAAGTGAACGGGACTAAAATGGTCAAACAAAAAACCAGTACTCTCCTCAAATCTGAAATCCTCTTCAATTCGCTATGCTCGATTCATATACTGCCCAGTTCTTGAATCAACCAGAATATCATCGCCTACGTTCACAAAAGAGGGCACAGTGACAACAGCTCCAGTTTCCAGGGTTGCAGGCTT…
Seq_227529	Sobic.009G174100	ER - Erecta	Arabidopsis thaliana ER (ERECTA) (ER) mRNA, complete cds.	Arabidopsis thaliana	GATCCCTTCTCCTCCTCTTCCGCCGCCGCCGCGGCAATGGCGACTCCCTCCCGCCTCCTCCTCCTCCCCGTCCTTGTCCTCCTCGCCGCCTCGGCCGGGGCGGCCGCGGCCGCCACCGTGAGCGACGACGTGCTCGCGCTGGTCGTCCTCAAGTCGGGCCTCTCCGACCCGGCGGGCCGCCTCGCGCCCTGGTCCGAGGACGCCGACCGCGCCTGCGCCTGGCCGGGGGTCTCCTGCGACCCGCGCACGGGCCGCGTCGCGGCGCTCGACCTCCCCGCCGCGTCGCTCGCGGGGCGCCTCCCGCGGTCCGCGCTGCTCCGCCTCGACGCGCTCGTCTCGCTCGCGCTCCCGGGGAACCGCCTCTCCGGCACGCTCCCCGACGCGCTGCCCCCTCGCCTC…
Seq_227699	Sobic.009G029100	Pid2	Oryza sativa Indica Group cultivar Digu B-lectin receptor kinase (Pid2) gene, complete cds.	Oryza sativa Indica Group	TGCTTTGAGATCTCTATGAATTATTGTTAGTCTTGAGTCTTGATGGAGATAAAAAATTCCTCTAGCTATCCCTTGGATTATCTTGCACCTTGTAGGCCACTGAAGCAATGGCTTTCTTGCTGAGTCAAAGATGAAGTAATCTAAGCTTTTGCTGGGCAAGTATTCATAAACCAACAACTTCTCAACTTCGTGAATAGAGCAGCCGAGAAGCTTAACTAGGTTCTTGTGCTGCAGTTTTGCAATCAAGACCACTTCATTTCTGAATTCCTCCATGCCTTGAACAGAACCCTTACTAAGTCTCTTGACTGCTACTTCCTTGGTACCAGCCAACACTCCCTTGTAAACTTTGCCAAAACCTCCCTTCCCAAGCATATTTGAGTCTGAGAAATGGTCTGTCGC…
Seq_227730	Sobic.003G096950	Pid2	Oryza sativa Indica Group cultivar Digu B-lectin receptor kinase (Pid2) gene, complete cds.	Oryza sativa Indica Group	AAATTGATAATGAGTTCTTGATCTGGTTGGTTTACACCAAAGTATCTTTGCAACACTGTGATATTCTGCAAGTAAAACTAATGCAATACATGTAGGGCCTTCAGATTGTAGTAACACGAAAATCAAAATACGTAAAGTATGGCTTTTCCTAGCAATGCTTATCTCCTGCATAAATCTAGGCTACTAACTACACACAATTATTTCATTTCACCTGGGTCCAGATAAATCTGAGGCATGTGCTGAGCTCGAGGAACCTATATTTTGTGCAATACCAAACATTGCTGCACTTGTTGCGACGAAGCTATGATCAATGTTGGCTTCTGCATCCATGCTACCTTCCAGGACTTTGACCACCTCAGACATTTGAGGCCTTCTTTTGCAATCGATCTGCAAACACCA…
Seq_228080	Sobic.006G268900	Serk3A	Nicotiana benthamiana SERK3A (Serk3A) mRNA, complete cds.	Nicotiana benthamiana	CGTTATTAATCAGACTAGCGGAGCAAGCAAAGCAAAGCAAAGCGCACCCATCCAGATACACACGAGCACGCGCCCGCGCCCGCGCCCGCGCCAGCACCACCAGTCCACCACCAGGCCGGCGCCGCCCAAAATCTCCGCGTCCCCCTCGCCCACCATGGCCTCCTTCTTCGGAGACGACGGCGCCGACGACCTCCCGCGCACCACCTCCCACCCCTTCGACTCCGACGACTTCGGCGCCGCCGCGGCCGACGGCGACGGCGCCGGCGGGTACGCCTCCTTCGCCGAGGGGGGCGTCGAGGAGGTGGACGAGGAGATCACCGTCGAGTCCGACGGGGTCCCGATCCGCCACGTCTCCGGGGGTTACTCGCCCTCGCCGTTCTCCCCAGAGCTCGAGCCCAA…
Seq_228221	Sobic.010G275600	PIB	Oryza sativa Japonica Group mRNA for Pib, complete cds.	Oryza sativa	TAAAGATTCGATGTGATGGAGAGAGAGTGTAAAAATTTGGAATTTGGAAGGGAAGTAAACAAGGCCCTTATTAAAGCGACAGATCACGGAATAAAACAGTAAGACTATTTTTAATGAAGAAAGAAGCAGCAAGCAGAGTGCATTTAGGCTGCACGCTCGCACGCACGCGGGCCTCTCGGTTTGAAAGATTGCCTCGGCTCGGTTATTTATTTATTTATCATCGGGACAAAGAAAAAAAACAGTGTATCAGGAGGAGCGTGGTCGCACAAGCTTCAACACAGGTCTCTTCTGGTCCGGGTGCAGCTCCATCCCGTCAATTTGCCGCTGCATGTCTTGCTTGTGCGCGTTGGTGTACCCCTTGAGCCACACTTCCTTGAGACACCTCAAATTACTTAGCCC…
Seq_228470	Sobic.003G163100	RFO1	Arabidopsis thaliana RFO1 (RESISTANCE TO FUSARIUM OXYSPORUM 1); kinase (RFO1) mRNA, complete cds.	Arabidopsis thaliana	AACAAGAAAACTGAAAGAACAGTGCCTTCTTGTTGAGGATGCTACCTCGAGCATAAAGGCGAAGCAACCCACCGCCAGCAAGTGTAAGAGAACCAAACCTTATACAATTATTATACCACTGTCACGTGAGAGGTCGCCATCACACTTGATTCATTAAGAATTCAAGCCTACCACCGTCTCTTTACATACAGAACAATGAATTACTCCATACATACACATGGGCAACTGAATTGTCATAAAGAGCATAAATACAGAGTCTTAAATAAAACCCCTAAGGTCCCGTCCTGGTGACGGCAGCTTGTTTAGAAGCATCTAAACAGTACTGGAAACGCTACCACATGACATGTACACAATCCGGAAGACTTCACCCTACAGCACTGTTGCCTGCTTTCCAACCAC…
Seq_228782	Sobic.003G342100	Hm3	Zea mays NADPH HC toxin reductase-like protein (Hm2) mRNA, complete cds.	Zea mays	TTTTTTTAGAAAAAAAAACACGTCATTTAGAAATGTATTATTTGCGTTCTGGCAGTTTATTTTCACCTTACAACAGTTTTTGAACAACACATTTTCACATTCAGCCAGCTGGATGAGATACTCGATATTTCTCTAATTTTCCTCTGAAGAAATCCGCGTGACGCGCTAGATGAGTCCTTTGCTTCTAAAGCAGTCCATAGTGTCCGCGATAGTTTTGTCCAATGGAGTGAAACGGACACCCAAATTGATCAGTTTCTTGGAGGGGTCCTTTGCCCTCACCACCCAGTCTTGTTTGTCCTCTTGGATTCTGTAAACTGAAAATTCAGGGTAGAGATGAGCAAGTTTATTGGTGAAATCGATCATCCGTTGAGAGGACTCCAGGCATAAGTGGCGTCCCTC…
Seq_228959	Sobic.002G074000	PEPR1	Arabidopsis thaliana PEPR1 (PEP1 RECEPTOR 1); ATP binding / kinase/ protein binding / protein serine/threonine kinase (PEPR1) mRNA, complete cds.	Arabidopsis thaliana	CACAACCACTAGTCCACTTCTTCAAGCGGACGACATCAGGAATCAGGATACAATTCCTTTTATCCTTTTTTTCTTTTTTCCGAAAAAAAATTGAAAATAAAACCCTTAAGGTAGAACACCAAATGGCTTGCTAAAGACGCATTCAGATATACTCCTATGTATGAGACATTTCTTAACTTGCAAGTTGCAGGTAGTGCAAGCCTGCAACAGCATTCTGCTTTGATGCTCCAAGATCCAACATCCGGTGATACATGGCGCATAATCAGGGTACTAATTACCGAATATATACAGAAAATCAAACGCTACTGGATGGATTTCATACTCAGAACCGATGACCAGAATTTGTTTGGTTTCAGAGGCTTGGCTCGGACTTCCAAGCAGGCGAAACAGCCATTCAGC…
Seq_229108	Sobic.002G419000	RFO1	Arabidopsis thaliana RFO1 (RESISTANCE TO FUSARIUM OXYSPORUM 1); kinase (RFO1) mRNA, complete cds.	Arabidopsis thaliana	GACCCCGTTGCTTGCACCGATTCGCCTCCTTCCTCCTCGGCACTCCCCACTCCCCGCCACCAACCAACCAACCCGCGCGCGGCGCGCCCCGAAGGAGAAGAGCGGGTCGGAGGTCCCAAGTCGGAGCCGAGCGCGCCCCCATCTTCCATCGGCGAGAGGTAGCACCGCGGAATTCCCCCGCTCCCTCCTTCGCCTGCGCCGCATCCCGCATCTTTTTCGCGAGTGTTTCGTCACACACAGGGGTTCCCACTCGCTACCGATCCGCGGGCTCCGGAGATAACGAACGCTTTGTCTGTTTCAGCTTCATGAGTTCTGGGAAAGCACTGGCATCCAACATCCCTTATTCAACAGTGAACAGCAGCATCATCTTTCTCTGCCTTTTCGCGGGATACTTGGGAA…
Seq_229112	Sobic.004G163300	RFO1	Arabidopsis thaliana RFO1 (RESISTANCE TO FUSARIUM OXYSPORUM 1); kinase (RFO1) mRNA, complete cds.	Arabidopsis thaliana	CAATTTAGTTTCGATTGTGTGAAATGGTGTATCTTTTTAATGATTTTAAAGGTTTGAAAAACAAAGAAGAATATTCAACAGGCGTGGTAGCAAATTGTCAACAAGATAGCTACAGGTGTGCAAAGCAACGGACACTGTGACCATCAATCTTGGAGATTATTACCTATACACCTTTTACATGTTGGGAATACCCAACTTGAGAATCCTAGCTCCACCACTGGATCCTCATAAATCATCATTGAAAAATGCTATATGCGTGTGCTGAAGTATATAAGTGAACATTTCTCCCAATTTAACCTTTTTGGTACAACTACTAGTTGCTACGTACAGCCCATAACATGACTACATCCATATACCCTAAGCCACTAATCAGAGGTAACCTCTCTTTTGGGTGTTTGA…
Seq_229346	Sobic.003G410100	RFO1	Arabidopsis thaliana RFO1 (RESISTANCE TO FUSARIUM OXYSPORUM 1); kinase (RFO1) mRNA, complete cds.	Arabidopsis thaliana	GTCGTCACAAAAGCACAGCACAGCAGAGACTTGAGACGGTCTCCCATTTCGCTCTCCCTCACCTTCCCGCGTCCTCCCTACGTTTCCCAGCAACCGCCTCCGCCGCCGTGGGCGACCTGCCGCGCCCGCAGCACATGACGCGGCCCCGCGATGGGCTGCATCCTCGGTAAGCTCGCCACCGCGCCCGGGTCCTCCCTCTTCTTTCCCGCCGCCGCGACGACCGCCGGGGGAGGAGGCGACAACAAGGAGGTGCAGCTTCAGGCGCCGCAGCCGGAGCACATCGCGGCGGTGAAGAAGGACGCGTCTGGGTGGCCGCTCTGGCTCTCCGAGGCCGCCGGTGACGCGCTCCGCGGCTGGGCGCCCCGCGGTGCCGACGCCTTCCAGAAGCTCGAGAAGATT…
Seq_229842	Sobic.010G013200	PEPR1	Arabidopsis thaliana PEPR1 (PEP1 RECEPTOR 1); ATP binding / kinase/ protein binding / protein serine/threonine kinase (PEPR1) mRNA, complete cds.	Arabidopsis thaliana	TTTTTTTGATCCATCAATTGCTGAACAAGCAAGATTTATATTTAGAATTGTGTTTAGCCGAGCATGTCACACTCCATACAAACCCACCGAACAAGCAAAAAATCCATGCAGTAACAAGTAACAACTGAAACCAGTCACACTTCGCAAAGCATAAAACACAATGTCACATGGAGACACATTCGGCCATGCTCGCAACCAACGCCCTTGGACCCAGGGACCAGGGCAAGATCAGGTGCACGAACCGGGACGCCTCTTATTCTCGTCACGCACAAGCACAGTAATAGACAAAGCTGGGCAACATCCACTGCTGCAAAGGAGATTGGTGGTTTATTCTGAGGTAAGTAGCCGGGGAAGAGTAGCGGTGACACTCTGGGAGGGCAACCATTGAATCTGTTTCTT…
Seq_229865	Sobic.001G525500	Pto	Lycopersicon pimpinellifolium Rio Grande-PtoR protein kinase mRNA, complete cds.	Solanum pimpinellifolium	GTACTCGTACACCAGGATCATCTCCGCCTGCTCGTTGCAGTAGCCGATGAGGGACACCAGGTGCCGGTGCCGGATGCGGGACAGCACCACGATCTCCGTCTGGAACTCCGGCAGGCCCTGCTTGGACGCGCGCGTCGCGCGCTTCACCGCCACGCGGGTGCCGTCGCCGAGCGCGCCGCGGTACACGTTGCCGAAGCCGCCCACGCCGATGAGGTTGCGCTCGTGGAAGTTGTCGGTGGCCGACCTCAGCTCCTCCAGCGGGATGTGGAGCTGCGTGCTCACCCTCTGCATCGCGCCGGTCGTGCCCTCGCCCGACCGGCTCGACGGCTCCATGACCCACCCGGAGCTTTCCTGCGACCACGGCAGCGGCTTGCTGCTCTCCTTCTCCAACGGCGCCGG…
Seq_229902	Sobic.006G067700	PEPR1	Arabidopsis thaliana PEPR1 (PEP1 RECEPTOR 1); ATP binding / kinase/ protein binding / protein serine/threonine kinase (PEPR1) mRNA, complete cds.	Arabidopsis thaliana	AGAGAGTACCAGTACTGTGTGTGTGAGCCTGGGCCCAAGGAGGGAGAGGCAGCCATCATCTGCTCCTCGTGATGCGCGCCGCTCATTGCTGCAGAGCGCTGCCGCTTTCGCCCTCGCCCACTTGAACTCTTTCCTCTTCCTCATCCCCACTGTCTTCCCCCCACACTCGCCGCCGTTTCGGGGGCCCAAAAACCCTAGCAAATCCTTGCCCGCCGCAGCCAGCTTCTCCAGGTGGGAGCACCGCGCGCTGCCGCCGCCGCCCCGAGCGCGGGCCGCACCAGCTCCCGCCGCCGCCACCCTTCGCGTGCCGCGCCAGCGGCCCAGGGTGCCGCCGTCCGGACTCCGTGATGCCGGTTCTTGACCCGGGAAAGCGGCTTCTCTGTTCACCGAAGTGCAGGC…
Seq_230006	Sobic.001G074200	Serk3A	Nicotiana benthamiana SERK3A (Serk3A) mRNA, complete cds.	Nicotiana benthamiana	GAACGCCTCTAAGTCAGAATCCATTCGCGCCGCCCCTGCCCGCCACCCGCGGGAGCGACGTCTCCACGCATCTGCACCCGCCGCTGGCGCTGCGGGCCTTCTCCCCGCCACCCCCCACTCCCACTCATCCCGCACCCGCGTTCCCCGTGCTCAACTCGCTGCCTCTCCAGCGACGACCACGAGGGGGCCGAAATAGGCAGGCAGGCAGGCCACCCAAAAAAGCGAGCACCCTACACGCACCACCTCGGCTGCCATTGCCATTGCCATACCATGGCCACGCCATGACGCCCCGCCCCGCTGCACGCGCTCACACCCCCACCGCTCCACTCCGCTCCGCCTCACCCTCACCCACCACCACCTCCCCATGCTTCCTCGCTGCTGCCACCGCCGCCGCTCGGG…
Seq_230084	Sobic.003G329800	Serk3A	Nicotiana benthamiana SERK3A (Serk3A) mRNA, complete cds.	Nicotiana benthamiana	ATCAAGTTCAAGAATTGCCGGATGTACCTTAATGCTGGAATGAATTGCCTGTTACTTCTTTTGTGCCATGATTTCAATCAGCTGGCGAAGTCTCAGTCGATCGATATCATGACCATCTTTCCATAAATTTGCCACAGCAGTATGTTCGGTGTACAAAACACAAGGAACCCAAAACTCATGGCAGGGGAAATGACAATATCATTTCAGTCATAATAAGCAGTTTCAAGTTTACTTTCACGGACAGAAAGCATTCTGCTAAAACATACATCAACTTTCGTGCAGACAGCAAGTAACAAATAAGAGCTATGCAGGGAGGATTACAGAGTGGCAGCAGAACCAGACCTAATAAATCTATATCATCCGATTTTTGGTAACCTTGTACGCTCATTACTTTCTAGC…
Seq_230238	Sobic.006G158266	Serk3A	Nicotiana benthamiana SERK3A (Serk3A) mRNA, complete cds.	Nicotiana benthamiana	CTCACAGCATCGGATCGTTCACACTGAAACGCCAGAGTGAAGTTCGGTCGTAGACTACTCTTCTATTACTTCACTCCAATCGCTCCCGTCCAGAGCGCCTGTGTTGCAGCGTAACGCGGACGCGATGGGTTGCCCCCGTCCGCTCCTCCTTCCCCTCTTCCTCCTCCTCGCCGCGGTCTGCTCTGACCACGCGGCCGTGCTCGCCGCCGCCGAGGAGTTCACCTACAACGGCTTCGGCGGCGCCAACCTCACGCTCGACGGCATGTCCGTGGTGGCGCCGAACGGCCTCCTGGTGCTCAGCAACGGCACCAGCCAGATGGCCGGGCACGCGTTCCACCCGGCGCCCGTCCGCCTGCGCGACGGCCCCGGCGGCGCCGTCAGGTCCTTCTCGGCGGCGTT…
Seq_230337	Sobic.004G255800	EFR	Arabidopsis thaliana EFR (EF-TU RECEPTOR); ATP binding / kinase/ protein serine/threonine kinase (EFR) mRNA, complete cds.	Arabidopsis thaliana	GGCCAGCCGAGTTGACGGGCCGGGAAGCAGAAAGGCAGGCCATTAGAACTTGACACCTCCCGTTTCCTGCGTTCTTCCTCCTTCTCCCCCTCCGCCATTGCTCGCTCCACAAGACATGTCCTGCACGCGCCAGAGCTAGGGAGAACTGGACAGGAGCGCAGGCTTCGGTCTCCTCCCATCCCCGCGGCGTCCTCTCGCGTGTTTGCTTCTTGGGAGCGCAGAGATTCGGCTCTTCAGGGCTTCCAGTCCAGGCTCTGCGCAGCGCAATCTGGTTCTGATTGTCAATGAAATTTACAATGGAATAGTCCATTGCAATGCTAAGGTTGCTTCCTGACTGACCAGATCGAGCTTGTTGCAGTCTCTGGTCATATTGTCTGGAAAAACAGACAAGTTTTTCAA…
Seq_230397	Sobic.004G347900	Serk3A	Nicotiana benthamiana SERK3A (Serk3A) mRNA, complete cds.	Nicotiana benthamiana	AGAGATTGAGCGGACTGCAATAAATTTGTCGCGTCCGGCGATCCATCTCCTACCTCTGACCTCCCTGCCCTCGTGCTCCTCCCGTCACCCTCGTCTCTACTCCCCGTGACGACCACGAAGGAATTCTTCCTCCGTCCTCCGTCCTCGCCCCGTCGTCTTCTCACCTGCGTGCTGCGTTCGCGGACAAACTTCTTGGTTGGTGACTCGGCGGAGCCCGAGCCTCAGCCTCACAGGAGAGGGAGAGCGGAGGAGCGGAGGAGAAAGCACCTTTCTTCCAGTTTCAGGCAAGCTCCCAGCTTTGACCGCCGCTCCTGCTGCTGCCTCCGTGTGCTCCCTGGGTCCCTGTCGCGTCCCGGATCGGAGCTCCCCTCCGTCCACGGGACACCGCCGGGCCGGGCG…
Seq_230402	Sobic.002G312600	MLA1	Hordeum vulgare MLA1 mRNA, complete cds.	Hordeum vulgare	GTTCTTCTTAACTTTCAGATACCTACTTCAAAAACTTTTCGATTCTCACGCGGGAATTCCCAATTTGCGTCCCAGAAAGTGCAACAAAGGGGGCGAGGCAGTGAGCGAGAGCGATGGAGTCAGTTCTTGCAAAGCTCGCACAGCTGATGGGGGCCAAGTCCAGCAACCTCATAGACTTGTCAAGCGACACGGCCTTTCTCCGAGATGAGCTCTCCACCATAAACGCTCTCCTCAAGAAGCTGGACAATGAAGATGAGCTCGACCCACAGGTGAAGGATTGGAGCAACCAAGTCAGGGAGCTGCGGTACGACATCGAGGATTGTCTTGACGAGTTTGCTCTCCGGGTTGGCAGCGCCGATGCCAAGGCCGGGTTCACTGAGAGGATTTCTCACTTCATCA…
Seq_230413	Sobic.003G313900	RPG1	Arabidopsis thaliana RTM1 (RESTRICTED TEV MOVEMENT 1) (RTM1) mRNA, complete cds.	Arabidopsis thaliana	AATATCTTCCTGGTAAGCTAAGCTCATCATCAGTCATCACTACGAACCACTTGGTACAGTGTTAATTCTCTCGGTCAGGTGTCTGGGCTTTGTTTCGACAGCGGAACATGAACTTCAGAGGTTCATCCGGGAAGAATTCAATGACGGTCGGGCCATGGGGAGGTCTAGGCGGAGATCCATGGGACGATGGTGTCAACTCCTCAGTGCGCCAGATCATCATCAGTCATGGTGCGGCCATTGATTCCATACAGTTCGAGTATGACCTGAGAGGAGGCTTAGTCTGGTCAGAGAAGCATGGGACTAGTGGTGGAGGCTCAAAAACTGATCAGGTGAAACTTAATTACCCTGAGGAAGTTCTCACATCTGTCAGTGGCTGCTATGGTGCAGTGGGAGCTTCAG…
Seq_230427	Sobic.005G060900	LeEIX6	Lycopersicon esculentum EIX receptor 2 (Eix2) gene, complete cds.	Solanum lycopersicum	TCGTCATGAAAATGTACGTATCGTCATAAAAAATAAAAATATCGTCAAACCGTCAGGGAAAATAAAAATACTGTCAGGGCTAGCTCGACAGGGTAATTCCAGTTTTGCTTAACGTTGGTCAGGGAATTTCAAGTTTCCAGTAGTGAATAGATGACAATATACCCGATTGGTTATGGGCCGTAGTTTCAACGGCAACCTATTTGGACATGTCAAAAAACCAGCTACGCGGCACATTACCAACAAATCTTGATGAAATGATGCCAGCAGCTGTCATGATTGATCTTAGTAGTAACAGAATTACTGGTCCAGTTCCACGTTTTCCAAGGAATATAGAGTATCTTGACCTCTCAAGAAACAATTTATCAGGGACGCTACCAGACTTTGGAGGCCTCATGAGTA…
Seq_230573	Sobic.009G230100	RFO1	Arabidopsis thaliana RFO1 (RESISTANCE TO FUSARIUM OXYSPORUM 1); kinase (RFO1) mRNA, complete cds.	Arabidopsis thaliana	CCTCGGGTGGTGTTCTTGATTCCCCAGCCCCAGTTATTGAACGCTTCGTTGACGAAACTGTGACGCTGCGTGCAACTGCAACGAGCAACGGGACTTTGCCGGTTTCGCTCTAGTCGTTAATCTCAATCAAGCAAGCCGTCCCCATTTTTTGTCACTGGAAACAAAGAAAAGTGTGTGTTATTGGCTCCTCCAACTACTACCGCCACGAAGCAACTCCGACCCTTTCCTCGTCATCGTCTTCCTCTTCGTTTCGTTCACACTATCATATCCTCTTTTTTTTTCTCAGGGGAGGGCACGCAGCGCGTAGAGGCTATCTGCTCATCTGATGCGACCGATCTTTGGGCGCGCCGACGAACGATGGACGCGTCGAGTTCCCTCGTGCTGGTCCTGTTGACCCTC…
Seq_230584	Sobic.008G060200	ER - Erecta	Arabidopsis thaliana ER (ERECTA) (ER) mRNA, complete cds.	Arabidopsis thaliana	CCCCACAGGTGATTGGCCGTCCTAACTAACAACCCTGCAAAGCCTGACACTGCTGGACCTTTCTTACAATAATCTTTCTGGGTCTGTTCCTAGGTTCCGCCAAAATGTGGATATTGATATAGTGGGGAATCCTGATCTTGTAACTGGTACAGGAAACAACAATTACACTCCTAGTCCTAGTTCTAGTCCTAGCACTCGTAAGAGAAGAGCACACAACGTTGTAGTCACCATCTTTGCTGCTGCCAGTGCTCTTGTTGGAATATGCTTCCTTGTTGTTATTGCTATGATCTCATCTCCAAAGAGAACATACCACGTAGACAACGTAATGATACCACCTGGTGAGGATGATTCTCGAATCACTAATGGTGGCCTCATAACAATGAACTGCTTCCGCACCTC…
Seq_230602	Sobic.006G021000	Bs3	Capsicum annuum cultivar ECW-30R Bs3 (Bs3) gene, complete cds.	Capsicum annuum	CTACGCTGCAGCTGGAATTTGCGGTATTTACTCCTCTATCTAGTTTTACCGGACCCTATATAGGGTGCGGTGCAGTCAGTGTTAGAGCGTCCGCAGTGTTTGTGTCGAAGTCGATTCTATGCATTTAATGCAGGTATAGGACCCGGTGCTTTACACTGTGGGGTTGATTCGATGAAGGAGCAGCTCCGAGCCATAGAACCCGCCCCTTTGCGATAAAAAAATATATCACTGACACATGACACAGCTCCAACTACCATGAGCTGATGAGCACCCCGGTTCCATACACGGCGAGCTCAATACCAGGAGAAGTCATGTCCCGCGATAGGAGCAACCCCGTTCCTTCGCACTGCGGACGCTCTTAGAGATAAGATATTTGTGGCTCAAGCGCCGTTGCATCGC…
Seq_230607	Sobic.001G113000	RFO1	Arabidopsis thaliana RFO1 (RESISTANCE TO FUSARIUM OXYSPORUM 1); kinase (RFO1) mRNA, complete cds.	Arabidopsis thaliana	TCTTGCCAATTATTTGCGCTTCAAATCGGCAGCACAGTACTTCATAATATAATCCGTACAAAAATATTAACTTTACCCTAAATAACCCAAACTCACATCCCTTACAGTGACAACTGTCAATTAATTAAACAGTCAAACTTTTGACTTGTTTTTTCTTTTTTAGAAAACATGGCCTTTTGAACACAACTATAGCAAAGACAAAAGGTTGATCAGTCGCACACTGCAGATGCAAATAAAATACACACAGAATTACATGACATTTGACAACCCTACCAGTGTACTCCAATATACCTAAAATGTGCAAAGTAGGAACTTAACGGTGAAAACATCTCAAAATCACTAGTAGCATGTTGAGTTCAACTCGCATCTGTTTAACCAAGGTCTCCAAAGGTCACAGAT…
Seq_230710	Sobic.001G382700	PEPR1	Arabidopsis thaliana PEPR1 (PEP1 RECEPTOR 1); ATP binding / kinase/ protein binding / protein serine/threonine kinase (PEPR1) mRNA, complete cds.	Arabidopsis thaliana	GGGAGCGTGGCGCACCCAACAGTCGCGGCGCCCGTTGCCAGGCGGCCAGGCTCCGGCTCCACCTCCACTCCTCGTTTTTTAAACGCTCCCCTCCTCTCCCTGGCCCCTACTCCCTAGTGATCACAGCGCATCGCATCTACTGCGAGTCTCTCTCCGCACACGGAGTCCGCCGCCGCGGCGGCTCCGGCTCCGGCGCCGCATCCGTCTTAGGATTACCCTTCTCCGCGCGGTAGAGACAGCTTGATTATTTCTCAGTCTTAAACTGATGATGCTGGTGCTCCTTTAATCAACTTGATTCAGAGATATATCAACTATGGGTTATCTGAATCATGGAAGGTCTCTCCCTCTACTTCTCTGTCTACATCTTTTGTTGCCACTACTTCCGTTTGCTACGGCAGA…
Seq_230980	Sobic.001G150200	RFO1	Arabidopsis thaliana RFO1 (RESISTANCE TO FUSARIUM OXYSPORUM 1); kinase (RFO1) mRNA, complete cds.	Arabidopsis thaliana	GTAAAAGTGCAGCTCGCAGCAACCAACAACCCGCTTCCAGCTTCCTCCTTGCAGTTGCAAATCAAGAACAGCGGCAGACAGGGGAGGATGCTGGCAGGTTTCTGAATACGCCATGTCTATGTTTCCAGAGGTACCAAGCACATAGCAGCAAGTTAGCAGGTAGGGTCATCAGACTTGTTCCATGATTTTTGTCTTTCAGACTTACTAGTTGATGAATACAGTAGTTGCCATATTCTCCCCATAGCTAGCGGCTAGCCTATTCTCTGATCTTGTCTGTAAAGAAATGCTTCTCCCTGCTTTTCTCCTGCAACCGCTCCTCCTCGCATGCTTCTTTTCATCCTTTGTTCATCCTATGGAACCAAACACATCCAGATCATGGTGCGCCAACATGTCCATTCC…
Seq_230981	Sobic.004G031400	Serk3A	Nicotiana benthamiana SERK3A (Serk3A) mRNA, complete cds.	Nicotiana benthamiana	CCCTGGCCACGGCCGCCAACAGCAGTCACCACCGAATCCATGATCTCTCCCTCGACCAACCCCGCCTTGACCTTCCCTCTCCCTCGCCCCAACCGCCGCCGCCCCCCTTCCACCCACTCTTCTCTCCATGTGCTCCCTTCCTCCCTCCGGGCCTCATCCTCATCCCCTTCCGCCTCCCATGTGCCGCCTCCATCTCCTCCCCCTCCTCCTCTTCGCCCTCCTCCTCCGCCCCATCCCGCTCGCCTCCCAACCGGCGGCGCCGCAATGCGCGCTCAACTTCACCGCGCTGCTCCCCTTCCTCGCGCCGCCGCTGCCGTCGGACGACGCCTCCCGCTGCGCGGTCGCCACGCAGTCCGTCGCCTTCCTCCTCTCGCTCCACCTCGCCGCCACATCATCCTT…
Seq_231026	Sobic.009G167800	xa21	Oryza sativa Indica Group Xa21 gene for receptor kinase-like protein, complete cds, cultivar:II you 8220.	Oryza sativa	GGGCCTCTGGCCTCTGGGGGCGGCGCGGGCCCCAGGCGTCAGAGCTACACGCTCGCACACTCTAGAAGAGTTCTTGTGCGGCGCCCGCCGGGCGCGGCTGTTGGATCCCGTGCCGCCGCCTCGCCTCGCCCGTCCTCGGTGCGTCAGCGTCCCCGTCATTGTAGCTGCCGCTGCGTGCCTGCGCCGGCCAGCCCGCTTGCTTCGCCCTCGCTTCGCTTCAAATGATAGAGCCGGAGCCGGTGCAGGCTGAGCGACCGCGAGCTTGACCCGGGCGCACGTCGGCTCGCACAGTCGCACCCAGCCATGTCGGCGCCTGGATTCGATGACCCCCAGCTTCCGCCGCTGCGGCTGCGCGCCTCGTGCGGCGGCGCGATCGCCAGCCCACGCTCCTGCTCCTCC…
Seq_231145	Sobic.002G011800	I-5	Lycopersicon esculentum disease resistance protein I2 (I2) gene, complete cds.	Solanum lycopersicum	GTCGTCTTGGAGATGACACAACAAGCTATACGTTATGTTGCAATGCAAGGTCATGTTTGCTAGCGAAAACATAAAAGGGAGAAGAAAAGGCATGTCCTGGGCAAAATAATGGCTATCAATTCATTTAACTCAGGGAAATATAGAGGTTGAAAAATCCACTTTACTCATGACGAGGTAGTAACTTACTAACAGTAGTACAGTTCACAAGGTTGCAACCCATAACATCCTCTCAATCAAACCTGTATATGACACCCTATCAAAATATGCTCAGATGTTTCACCACATAAGCCCAACAACAGAAGAAATTTCAACAAACATGATTCCATTTTTATTTAGTAGAACGTTTCCTCTTGGTAGCTGCAGTTTTTTGCTGTCGAATCTCACAAGAGGTAACATAGC…
Seq_231147	Sobic.002G012000	R3a	Solanum tuberosum potato late blight resistance protein R3a gene, complete cds.	Solanum tuberosum	CTTATTGGTGCCCATCATATACATTTTTGTGAAGAACCACTCGGAATTTACATATGGCAAGCTAGTAAAATTTGCCATGTTTGTAACCTGTGACACCCTATATATCATAAAATTGTTCGTGGTACTATTGTTTGCATTTTGTGAGTTGTGACAGCCAATCAATAAAACATGTTCAAATATACAAATATATAAGCTTCATAATGACATGATCAAGACCGCTTTCTCTTAGCACCTTGAGTCCTTAGGTCTCGGATCTCACAACTGTAGATATAGTTATAATAGGGTGGTATCTGGGAGCTAAATGCGAGTGCTTCAAATCTCCCAGAAGGATTAACATCTCCATACACCAAACTTTTCATCGATACCTTTGGAACCTCCTCTTGCGAAGAGCGCTCATAC…
Seq_231154	Sobic.003G248100	RPG1	Hordeum vulgare subsp. vulgare RPG1 (Rpg1) gene, Rpg1-Swiss Hv 489 allele, complete cds.	Hordeum vulgare	GGGCGGGCCACGGAACGTACCGCTGCAATCAATCAAAAGAAGGGAAAAAAAAAAACCCGCCGCGCTGAACCGGAGCCGCAGGAGCAGTCACGGACGGAATCACAGCACTCCCTGACGCTGTCCTCTGCCACCAGGCCAGGCCAGGTCGGTCGATAGGGAGGCGGAGCGGGCCTCAGGCCTCCAGGGGCTCGGCTCGTCTCGTCCGTTTTAACGCCACCTCGCTTGCGACGCAACCCCAACCCCCCACCGCTGCGGTGCGGCAGCATCACCATTCACCACACCACCATCAGGGAATCGGACGCCACACCACCACAACTCTCCACCCCCACCCTCGCCGCGAGTTGCTCAGTCGCAGCGAGCGAGGCGGGGGCCAGGCCACAGCGCGGGGCGAGGCGAGCG…
Seq_231163	Sobic.009G049800	Pi36	Oryza sativa (indica cultivar-group) CC-NBS-LRR Pi36 (Pi36) gene, complete cds.	Oryza sativa Indica Group	CAACCTAATAAGCCAACTTGGAGTATTAGGTAGGCTGATACCCACCATTCTCCCCCAAGGTATTCTTATATAATAAGAGAATACATCATCAACCATCCAGTTATATTTTTTAATAAAGAAGAAGGGAGATGGATCAGAGAGGGAAATGTCTCACCCACTGGCAACATGCATATTTATTACAAATAAGTAAGTCTTGAACGACTTGAAAACACTAGCTAGTCTTAGATATAGATCTTAAGGAGATCTATCGATAGATGGCGTACACACAACTAGATGCTCATTTGGCTGAATATATATGTCTAGCAGCCAAGCGGAATATATTATTTAATTAATCTATCATCGTAGGCCAAGCAAGCATTGGCGCATTGCCATGTCATTATGTCAACTCATCGGCTGATC…
Seq_231245	Sobic.001G406000	xa21	Oryza sativa Indica Group Xa21 gene for receptor kinase-like protein, complete cds, cultivar:II you 8220.	Oryza sativa	TGCCCATTGGCTGCTTGATTTGACGCAAATTTGGATTGAATTGAATTGAGTGGACAAAGGGAACGACAGTACATGGTACTAGCACAGGTACAACGGCCAACGGCGGCCAGCCGAGTCCTACTCCTACCACCCCAAACCCGCATTTATACCGACAGATGTGACTGTGACAACCAGGACGTGGGCCACAGCGGAGCCCGCTGCTGCCGCTGCCGACGACGAGGACGAGGACGTCACGATCACGGCCGTCGGAGAAGGCGGCGGCGCTGGGTACGGGCGCACTTGCGTTGCCATTTCTTGGCGCCTCGGAACTGGGAGGTGGGGCCCAGGTGTCGGCTGCCCAGGTGGCCCCGGTCCCCCACTCCACTTCCTCCCAGTCCCAGCTAGTCCGCGGCCCGTTTG…
Seq_231303	Sobic.009G193400	PEPR1	Arabidopsis thaliana PEPR1 (PEP1 RECEPTOR 1); ATP binding / kinase/ protein binding / protein serine/threonine kinase (PEPR1) mRNA, complete cds.	Arabidopsis thaliana	CCCACTTTTATTGTCTCTAAACCAAATAAAAAATAGGACAGTTCTGTCCTCACTCAACTAACATCAGACACACCATAATCTAAGACGGGACCATTCCATTTTAGGATGTCTCTCGACCTAACTCAACCTTACGAGAATATGTTCACAAGGATAAATGTGTCAATTACTCGTTTGACATGGCACTGTATCCGACACACGTGCGTTCCAATTCATATGCACCAACTGCAGGTTTTTTTTTGAGCAATACAGCTGCAGGTTGATCAGGCTCCTACGAATCTTGACCTTAAAGAAACAACTATGAGGTCAATACACATAACACAGGTTCGCCACAGCAACACAGCTTGTTTGCTCCTGGTCCCTTGTATCTAGTATACACTAGGTTTCGCCAATATGGCTGAG…
Seq_231318	Sobic.001G391200	Lr34	Triticum aestivum chromosome 4 clone BAC ABCT5; BAC ABCT33 map 4A, *** SEQUENCING IN PROGRESS ***, 7 ordered pieces.	Triticum aestivum	CCACCCTTCACGCGCGCTTGGCCCGCTACGACGCCTCGTCTCTCTCTCCACCAACCAGACCAACCTCCGGCCACGGGCTCACGGCGGCGAGCGGCCCCAGCTCCGATGGCGCCAACGGTTGAGATCAGCCACCTCTCCTTCACCTACCCGGGCATCGACGGCCGCCCGCCACCCGGCGCGCCGCCGCTCATCGAGGACGTCTGCTTCTCCCTCGACGCCGGCCAACGATGCCTCCTCCTCGGCTCCAACGGCGCAGGCAAGACGACGATACTGAAGATACTAGGCGGGAAGCACATGGTGGATCCGAGCATGGTGCGGGTCCTGGGAAGGTCCGCCTTCCACGACACGGCGCTCACCTCCTCCGGCGACCTCTGCTATCTCGGCGGTGAGTGGAGACGC…
Seq_231440	Sobic.008G134500	Serk3A	Nicotiana benthamiana SERK3A (Serk3A) mRNA, complete cds.	Nicotiana benthamiana	AGACGATGTTTATATACCCAAGAATCATAGCAATTACTAGAGATGTTTTTGAGTCTTGATTCTCTTCCCTATCTCTGCTAAACTGTTTTACCTCAATTTTGGAGCTATCAGCAAACAAGTTTTTTTGCAGATTTAGCTCCACTCCTGAAATTTTTTTATATAATGAAAAAGCTCCACTCCAGAATTTACATCTTTAATTTCTATTATAAGCGTCCAGCATCCATATATGGAGATTTATGCCATTCGTCACTTGATTTAACAGCTCAATAACATGATGAATACAATATCCTGATGCATCTTTGACTTATTCTTTGAATTCTTGACACTTAACCATACAATTGAAGGACTGATCTCATCGTGGCACAGGACCTATTTGAGTTTCTGATATATTGCCAACCT…
Seq_231456	Sobic.001G200000	RPG1	Glycine max NB-LRR type disease resistance protein Rps1-k-1 (Rps1-k-1) and NB-LRR type disease resistance protein Rps1-k-2 (Rps1-k-2) genes, complete cds.	Glycine max	GTTTCCTATTCATCCATACCTCGTGAGAGCATTCTTCCATACCTCAAAAACTCAATCCTCTCACACAATGGGTGATGCGGTACTCTCAGCCTTTCTGCAAGTCCTTTTTCAGGGAATTGCACATACCATGAAGGAGGAGCTGAAGAAGTCAGATTGTCTCAAGAAAGAGAGGGAACTCCTGACTTCTAAAGTGGAAATGATACAGGCCGTTCTTAAAGGAGCTGAGAATATGCAGCTTTCTGAGCTACAGAAATTGTGGTTTGGTAACTTGAAAGATGTCAGCTACGACGCAATGGAGGTATTGGATAAGTACCTCTATGAAGATCATCGACGTCAACATCTTTCCAGTGTGCGCAATAACACAGTAAGTTCTGCCATGAATCCTAAGCGTCAGTACTT…
Seq_231467	Sobic.002G333500	Pid2	Oryza sativa Indica Group cultivar Digu B-lectin receptor kinase (Pid2) gene, complete cds.	Oryza sativa Indica Group	GAGTGAGTGGTTGGTGCTCTCAGGGTGGCCGTGGCCTCTGCCAATAGGGCCGGGGCGGGAGCACACCGGGAGAGAAAGAGAGATGGTGGGGATGAAGCCAGGGGGAGGAGTGTTCCGTTTCTCCTCCATGGCCCCCTCTCCTCGGCTCCTCTTCCTGCTCCTCGCCTGCCTGTGCAGCTGTGTGGCGGCTGCGCAGACGACGGACACGCTGCGGCAGGGGCAGTCGCTGTCCGGGGCGGCGACGCTGGTGTCCACGCCGGAGGGGGTGTTCGAGGCGGGCTTCTTCGCGCCGGACCTCCAGCAGCCCTCCCGCCAGTACCTCGGCATCTGGTACCACGGCATCTCGCCGCGGACCGTCGTCTGGGTCGCCAACCGCGTCGCGCCGGCCACCTCGGCGCT…
Seq_231571	Sobic.006G272700	I-6	Lycopersicon esculentum disease resistance protein I2 (I2) gene, complete cds.	Solanum lycopersicum	ATCTCCCTACTTTTATACTCAATGTACTCTCAAGGGAAGGGAGGAACACACGCACACAGAAGAAAGAAAAGGAAAAAAAAAAGCAAATGGACATTGTCATTTCTGCAGTAGCAAGCGAGCTAGTGAGCCGGTTCATCTCCTTCCTTTCCAAGCAGTACAGCAGCAGCACATGTCTGAAGCAAAACCTAGAAGAGCTGCAGCGTCTCCTCCTCAGAGCCCACACCATCGTCGAGGAGGCCGAGGGACGGTACGTGTCCAACTCAGGGATGCTGGCACAGCTCAGGGCTCTGACGGAGGCCATGTTTCGAGGGTACGACGTGCTGGACACCTGCATGCCGTTGGAGAAGCTCGGAGACGAAGCAGAGGAGGAGGTGAGTGGTTTTCTCCACACATGGCCGC…
Seq_231580	Sobic.003G325300	RPG1	Arabidopsis thaliana RPS2 (RESISTANT TO P. SYRINGAE 2) (RPS2) mRNA, complete cds.	Arabidopsis thaliana	GCGCCGTGAATCTTAGGACGCAGACATCTTGTTCAGTGTGGAACAAACATATAGCAGAATAAATGAATAATTGCTAAACATTGTTCAATTATTTGCATGCTGGGCCAAACTCAATTTACTTCGTGTTGTTACAGACTTCAGGTACAACCACATAGCAGACATCCCACTTCCCTACAAGACCAATTCACAAAATTGTACTAGCCGTGTATGAACCATGCAAGAGTTCGCTGGCATATAGGAAGGTGAAACCAAAAAATATGTTGGTTTGAGAAACCGACTGATAAATGCTGCAGAAACACATGAAGACTTCTTCAGTTCATCCTTCAGTTGCAATATGAGGTAGCAAGGGCCTCCAGTTTCTGAACAGCAACCAACGTTTAATGGTTTCGTCGTCCCATA…
Seq_231665	Sobic.001G428900	Pid2	Oryza sativa Indica Group cultivar Digu B-lectin receptor kinase (Pid2) gene, complete cds.	Oryza sativa Indica Group	TCGGAGTTACCTGACCCGTGTGCCCCGCATAAGTACGAGCGAATCAGCGAAATGGCGAATAATTTAGGGGAGCATTACAACCATCACCATACAGAGTTTTTGTTACGGTCAGCCCTGCCGCAAGCACGGGCGCGTATATGTGTCCGTGGCGCCACCTCGCTCTGCTCTTCTTGCTCGCGTGCTTGTTCCGGAGGCCATGCTCATCTGCCGCGGCGAGCGACACGCTCTCCGCAGGAGAATCTCTCACCGGTAACCGGACGCTGGTGTCGGCGGGAGGCAAGTTTGAGCTGGGCTTCTTCTCCCCGGCCGGAAACTCCAGCCACTACGTCGGCATATGGTACAAGCGGGTCCCGGGACGGACCGTCATCTGGGTGATGAACAGAGACTCCCCGGTCACCG…
Seq_231761	Sobic.004G348200	Serk3B	Nicotiana benthamiana SERK3B (Serk3B) mRNA, complete cds.	Nicotiana benthamiana	CCAGGATTTCTTCCATTGACAGTTAAAAAGTGTACATCGGCCTAATCACAGCCTGACCAAATTGCATCTGATATTTATCAACCAAAGCTGAATCTCTATATGTACTACTAGTACCATATATAACATGTCACTCCTTTGTACATCATCGATAAGAACAAGAGGGGAAAAACGAAGTTTATAATCTATCTATGTAAAGCCTAAACTCCTCCCAAATTAACAATGAATCAATTGGAGTCCAAGGCAATCTATGTCCTCAGTGGTAGTAGCGACAGCTCTATACTGCTATCTATCAGCATCTCAATTCTCAAATCCTCAACTCTATAGCAATCGCTAAGCGTAGCTAGCATGATAAGATCGGCAAGTCGCTTTGGCCGGGAATGGCGCCAGCAGCACCGGGAA…
Seq_231806	Sobic.004G021000	RFO1	Arabidopsis thaliana RFO1 (RESISTANCE TO FUSARIUM OXYSPORUM 1); kinase (RFO1) mRNA, complete cds.	Arabidopsis thaliana	GAAGGCAAGGCAGCCATCCACAAGCACAAGCCACCCCGGGCTCAACTCGAGTCCACCCGAGGTCCCAGAGTCCCCACCCACCACCACCACTCCTCCCCTCGCCGCCGCCAGTTCCCGCCCGATCCGGCCGGATCGCCCCGCCATGGACCAGTACGAGAAGACGGAGAAGATCGGGGAAGGCACGTACGGGGTGGTGTACAAGGGCACAAACCGCCACACCAACGAGACGATCGCGCTCAAGAAGATCCGCCTCGAGCAGGAGGACGAGGGCGTCCCTTCCACCGCCATCCGCGAGATCTCCCTCCTCAAGGAGATGCAGCACCGCAACATCGTCAGGCTGCAGGACGTCGTGCACAACGACAAGTGCATCTACCTCGTCTTCGAGTACCTCGACCTCGA…
Seq_232102	Sobic.006G230300	Pid2	Oryza sativa Indica Group cultivar Digu B-lectin receptor kinase (Pid2) gene, complete cds.	Oryza sativa Indica Group	CACCACATTTGATCCGGGATCCCCCCAACAGCAGGATACCCATTCACAAGAATCTAATACGCCATATGACGTGTACACATACACACATACATGCACTCAGGATTCCCAAATACGAATACAGTTCACGAGCTACAACTTACAAGTAAATCTATACCCAGATACAGTACTATATTTGGAACTAAGCATTCCGTACAAACCATTCTTTAGGGATCAGCTGGAGTTGCCCCCTGCTACTTATAAACATACTCCGTACAAACTTAGTCATAATAGGAAGACGATATACAGAGTGAAACTTGGGCAGCCTGAGACAGTGAGACTATCTGCCCTGAAGATCCGTGTACGTTAATTGATTCCCTGATTCAGTATTGTTGCCATCCGCAGGAAGACGAGGAGACCTTC…
Seq_232227	Sobic.001G113800	Serk3A	Nicotiana benthamiana SERK3A (Serk3A) mRNA, complete cds.	Nicotiana benthamiana	CTCTTCTGATTTTTTTTTAAAGAAAAAGATATGACGAGGAAAAAAAACGAAAATCTTATCCTATAAAGGTATAGGAGTAATCATGTACAGTATGTCATCGGTCAGCACGATGTCATTGACCCGATGAGAGGCCGAGAGCGCAGGGGCTGCAGGTGAGGCGGATGCTTCAAGCTTTCTCTTCTTGGTAGGTTGCTGTCACTCTGAGGCCCCGAGGCACTGCTAGGTGCTAGCTGAAAGCCGAAAGAAGGAATCCACGGCGGGCGGCAGGAGAACCACCGTTGATCAGCCCCCAACCCGTCCCCAAGCTAGCAGCAATAAGGGGAAGCGACCGGGCAAGGGGGCAGGCCGCGGCCGGCCGGGCGAGCGAGCGGGTCGGCCACCCCGCCTTGTCGCTGTCCG…
Seq_232261	Sobic.001G383300	Lr34	Triticum aestivum chromosome 4 clone BAC ABCT5; BAC ABCT33 map 4A, *** SEQUENCING IN PROGRESS ***, 7 ordered pieces.	Triticum aestivum	GGACCACAGCCAGAGGGAGTCCAACACTCCGCCTCCAGCCCTCCACGCTGTGTCTGCTGACCCTACCCATCGCGGCCGCCGCCGGCCCGCCGCTGCCGCCGCCAGGCGCTATGCGGCCTTGCTCCCGCATACTCGCGGCGGGCCACCTTCTCCGCGGCTACCGGTTCAATCCCTTCCAGACTACCTCCTCCGCTGCCGGATTTCGGCGGCTGAACGGAGCCAACAGGCCATGCGTGCCGAAACCTCTCTTTAGCACTCTCCTCGGAGGCTTCAGATCGAACTGTGGCGTACTGCCCGGGAAAGGGGTCCCCTTGGGCAGCCTCGGCAGCTTCCTGCCGGACTCTGCCTACCCGCTGCACGGCGCGCGGCTTCAACGAGATACGAGAGGTAATGCATTCT…
Seq_232393	Sobic.004G189900	Serk3A	Nicotiana benthamiana SERK3A (Serk3A) mRNA, complete cds.	Nicotiana benthamiana	CTTTCCTGGTCCCGCACGTCGGTGACGTGCTGTGGAGGTCGCCGCGGTGGGTCGTCCCCTTGCTCCGAGAGCGTAGGCGGTGGTCCCACCGCGGAGTAGAAGAACAATTTTAGGTCGGCACACACACGCGCGCACACAGCCGCACTTCGTTTCCAGCTACAGAGAGAATTCGTCCCCGAAAAGAAAAATAAATCTCCCTTCCATTCGAGAGAGAGAGGGAGGAGGAGCACGCCGTGAGCTCAGGAGGGAGAGGGAGAGAGTCAGAGAGAGGCCGGCGGCGGCGCGGCAGATCGGGCAGCGCCGTGTAGCTCGCACCGGTGGGGGGACCCACGCGCCCATGCTTCGGTGAGGTGGTGGGGCCCGCTTGGCGCACGAGTTGGAATGGCGGCGGCGGGGAGG…
Seq_232517	Sobic.001G061400	ER - Erecta	Arabidopsis thaliana ER (ERECTA) (ER) mRNA, complete cds.	Arabidopsis thaliana	GGAGTTCAGACGTGTGCTCTTCCAATCTCTGCGGCAGCCGGAAACGACGCTTCCGATGGAAGGCAAAACACGGCTCGGCTCAAAGAGACGCATCGTGCCTTCAGCCCAAGACAGCTCGGCTCCTTACATCAGCTCAGTTCCTTCCTTCCCATCCCAATCTCGTCCGATGCTCACCGTCGCCCATACCCGCGACCTCGGCCATGGAGAGGAGACCAATCCGACGCCCGACATCGCGGCTGCGCACCTCGCCGCGCTCCGCCGCTCCTCCTCGCCTCCCTCCGCCGACGCCGGCGCAAGATCACCGCCGGACTCCGCTCTGCTGCTTCGTTCCCGTCCCAATCCAACTCCGAAGCTTCGCTCGCGCTCCGCGTCGGTTATAGCCTGACGACTCCTTTTCGC…
Seq_232650	Sobic.002G032800	Pto	Lycopersicon pimpinellifolium Rio Grande-PtoR protein kinase mRNA, complete cds.	Solanum pimpinellifolium	CTCGCATATCCCAAGTAATGCTTCACACTGCATTTCTTTCCAGAATATTATGAAAGAATGAATCAAATTGGTATCATTTAGCACGTTCTACATCAGTGCAAAGAACAAACAAAAAGAAAAGAAAGAGTAAGGCCAAAGAATAAACCCCACTGAACTAAAAGGATTTCAGTATATTGTTGGGGCAACCATACATGGTGTTTACAGTACTGCAGATAGCTGTGCAGCTGAGCATGTCGTTAATTTGACACTCACCCTATTTAAACAGTCCCTGGTACCTCAACTTTTACTTCAACTGCTTCCCCATCTGCATCTTCACAGATTGCACGAGTGGATTCTTGTACATCAAAGAGGTTCAGTTCATGCCCTGATAGATCATCAGCAGTTGAACTTTGCAGATGC…
Seq_232752	Sobic.004G169100	xa21	Oryza sativa Indica Group Xa21 gene for receptor kinase-like protein, complete cds, cultivar:II you 8220.	Oryza sativa	ACAAATCAGCGAACAGTACTTTCAAACATAGCTTTTCAGCCAAGCGAACGGAGTTTCGGGGCAAGTTTTCAGACGTAGTAACTGCTAATAGTTGGTGCATGTCCTATCGATCAGCGTGTCACCTTCATGTTCCACTACAAGAGAACTGGCGAACATCAGGTTTGCATCTCTGATTGCATGCATCTCAACGGCTGCATCTCGTATCGGCATGCGCTGTCTGGGTTGCTGCTTCGAGCAGGATATGCCAATACTAATGACAGAGATCAGAGATTCCTGAACTCTGCTTCTTGTGATCTTATCGCTGTCGTCATTGTGCACCCATATTGTTGGATCAGCTATCTCCATGATCCTGTCAGGGAGAGCAGCCTCCGAGAACTTGTGAAGATCTAATGATCCTGT…
Seq_232895	Sobic.001G018100	RFO1	Arabidopsis thaliana RFO1 (RESISTANCE TO FUSARIUM OXYSPORUM 1); kinase (RFO1) mRNA, complete cds.	Arabidopsis thaliana	CGCCCCAGCTGATGAAAACCGTGTTGAACGACATCTTGAAGATACTCAGGGAGTCACCAGATTGAAGTGTATAATGTTGCAATTACAGGCATTCGTTGCCCATGCCGCTAACCTATATACACATGCGTAGCGAAAGTGTTATTTACAACTGAAATCACAGAAAAAGGGCACCAAGAAAACACAGAAATAAGATAATTAACTGTGTCACACGAACCAAGTGAACAACAACACATCTCCATTCCACCAAACAACATGACAGCCTAAAACTCAAAAAAAAAAAGATCAACACAATGTGCAGGGAAAACAACGGCCTGCAGCTAATTCTCAGTAGGATCCTCAGTGGCCGTGCGCCTCCTTAGCTTAGCGCGCGTCACACGGATCGTCTCCTCCATCGGCGTC…
Seq_233014	Sobic.010G136900	Lr34	Triticum aestivum chromosome 4 clone BAC ABCT5; BAC ABCT33 map 4A, *** SEQUENCING IN PROGRESS ***, 7 ordered pieces.	Triticum aestivum	CATGTATAGCTTCATTACACAATCATAGATATGAAATATTAGAGTTAATCTTATAATTGTTTTGTCTTCAGTAGCATCCTTTAACAACTTACAACATTTCTTTCATAAAGATATTAAAGGCGGGTACATGGGTTTTGCATGCCACAAATACATTGAGTAGGACGTCTAAACATTTCACCCTTAAATATTGGCTTTAGCTTGTCCACAACCTTAATAATCAATATAAAGAGCAGCCTATATGCTACAATCATTCCACATAGCACTGCAAAGTCCACCCATTTTGAGTGGCCCATTTCCACTTCAAATAAGGTACGGATCACTTGCTCGCCAGTTATTGTTTTATCTCCTACTCCTGGGTTGTTTTGGAGAACCAAACCCAAGAACTCATTCTTGTAAAAT…
Seq_233116	Sobic.009G019200	Pid2	Oryza sativa Indica Group cultivar Digu B-lectin receptor kinase (Pid2) gene, complete cds.	Oryza sativa Indica Group	GCACAATACGCGCTGTGCTTCCCAGGACAGCAGCATATCAGCACACACGCCACTATCATTGATGTGTGCTCCTACTCCTCTCTGCCATCATCGTCTCCCCAACACGGTTGCCTGGCGCCTGCTCCGGCCATGCTGCCTCCCAACCCCCTCTACCACGTAGCACTGGCTGTTGCGCTCATCTTCTTCTCTTCGCTGCACACTCCAGCTGCTGCTGCTACTGACGGCGATACTCTCGCGGCAGGCCAGGCGCTTGCCGCCGGTGACAAGCTCGTCTCCCGCAACGGCAAGTTCGCGCTCGGCTTCTTCCAGTTCCGGCAAACCCTGCCAGGCGTCAGCAGCGGTGGCGGTGGCGACACCACCGGTAAGTCCACCAGCACCACCACAGTCGCCGTCTCCTCC…
Seq_233117	Sobic.009G082700	Pid2	Oryza sativa Indica Group cultivar Digu B-lectin receptor kinase (Pid2) gene, complete cds.	Oryza sativa Indica Group	GTGGCAGAGCTTCGACTACCCGACTGACGTCGTGCTTCCGGGCGCCAAGTTTGGCCGGAACAAGGTCACCGGTTTCAGTCGCAAGGCCATCACATGGAAGAGCCTCATTGATCCAGGCCTCGGCTCATACTCCATTGAAATCGACACCAGCGGGGTGGTCCTCAAGCACCGCAGTCCGTCAGTAGTGTACTGGCATTGGTCATCCTCATCCACATCAACACTGAAGCTCATCCCCATACTCAAGTCCATACTAGAACTGGATCCACGGACCAAAGGCTTGATTGACCCCACATATGTTGATAACAGTCAGGAGGAGTACTACATGTACACCTCACTGAATGAGTCATCTTTGACGTTCGTCTCACTGGACATCTCTGGCCAGATCAAGATGAATGTTTG…
Seq_233227	Sobic.008G094000	Xa13	Oryza sativa (indica cultivar-group) cultivar IR24 disease resistant allele XA13 (Xa13) gene, complete cds.	Oryza sativa Indica Group	AATAATATAATAGGGTCACAAGAGTTTCAGCCAACACAGAGCGAGGACTCCTTCTCACAACTCTCCCTTCCCTCCTGTAGGGGCCAAAGGGTTAGAGAGGAAGAGAAGTTGTTCCCAAGCTAGCCTAACAAGAAAACAAGCTCATCATTGTGATTCCAGCAACTGTTGGCTCAGTTGTATAGCTTGTGTTGGGAAATTCTTGTGACCCTATTATATTATTTGTAGCTCCCCCTTTTCTTGTCGTGATGGCAGGCCTATCTCTGCAGCACCCCTGGGCATTCGCGTTCGGCCTCCTAGGCAACGTCATCTCCTTCATGACCTTCCTGGCCCCGATACCGACGTTCTACCGCATATACAAGACCAAGTCGACGGAGGGTTTCCAGTCGGTTCCCTACGTGG…
Seq_233288	Sobic.009G143500	Xa13	Oryza sativa (indica cultivar-group) cultivar IR24 disease resistant allele XA13 (Xa13) gene, complete cds.	Oryza sativa Indica Group	CCTCATGATGGAGAGCGGCGAGGCGTACATGCAGATGGAGCAGACGGTGGCGGCGAGGCCGCACATGAGCTTCCGCGCCTGGCCGTGGTGGAGCGCCAGCATCGACACCAGCGCCACGGCGGCGAACACCGCCGCCACCGCCGACGCCAGGCCCAGCATCCGCAGCCGCGTCCGCTGGGTGGACGCGAACACCAGGAAGATCACCACGTACACGACCTCGATCGCGGCGCCCGCGCCGTTGATCGTCGACACCAGGATGTTGTTCGGGGACACGAACGGCAGCCCGTACCAAGCTGACAAGAGGCAGTTGAGGAGTGTCATGTTGTACGGCACCCCTGAGAAATCCTCCGTCGACCTCCTCCTGATGATCCTCCAGAAGGTAGGCACTGGGGATAGGAA…
Seq_233330	Sobic.002G169400	Pi5-1	Oryza sativa Japonica Group Pi5-1 (Pi5-1) gene, complete cds.	Oryza sativa Japonica Group	CAGCTGCATCCAAAATTATTTTTGCACCAGTAGCCACCAGGCTCCGCCGTCTTCCCTGCGACCCTGTCTTCGTTGTCCGTCCCCAAATTTTCTTCAGCAAAGAACAGAGCAGCAGAGGAGACTAAAAAGAGCAGTGAGTGGATTGAAAGAACTCCTACCAAACAAGTTGGAAAGGGGCGCGAGTGGCCGCGGGATGCAGATCTGTACCTTTCCCCTCGGTTCTTTCTCTCGATCTCTTCCCCTGTGACCATGAGTCATGGCGTCTAGGCCCAGAGCAGCTGACGGGCCTTCTCTGGTGACGTAGACGTATCCAAGCGGAAAGATACGACACCATGCTTGCCATTGAGACTCTTGTGGCTATCGCTGTGGCGAAGATGGTAGCTCAAAAGATCGCCAGCT…
Seq_233406	Sobic.010G246200	Lr34	Triticum aestivum chromosome 4 clone BAC ABCT5; BAC ABCT33 map 4A, *** SEQUENCING IN PROGRESS ***, 7 ordered pieces.	Triticum aestivum	TAGACGACTAACACTAGAGTTTGGAGATTAGCAAAGAGTAATTATGTCATGGGCTGCGTATCCAGCGGAGTGGTGGGCTTCGACTATGCATCTGTGGGCCTCGGCCTTGGGCGTGTTGGCCCTCGGCATTGTGAGTTGTCCAGAAAAAAAAAACAAATTAAAGCAAATCCGCCAAGAACATGTTTGGCTTACATACACTCTTAGCTGTCGAAGCTAACTAACAGATTGTATACACGAACAGAGGAGATTAGAAAGATAACCACGTCCGATCCTTTCCCTCCCGAACAACAGCTAGAAAGCATCCGAGGAGATGGAATCCAATCCAACGAAGCAGCAACCAGGCTTTAGCTGCTGAGCTCCAAGAAACGCCTGGCCATCGGGTGCTTGGCGTCGGACAGG…
Seq_233443	Sobic.002G303000	Pit	Oryza sativa Japonica Group Pit mRNA for NBS-LRR disease resistance protein, complete cds.	Oryza sativa Japonica Group	ATACAAGTGTAACTCACACTTATAATGCCTTTTATACAAAGTCAGGTCTCATACACTGGAACATAAAATTGAGATGTGCATATCAATGCATCATACAATTCAAACTAACTCAAGCAGAACGAAAGGCAAAACCACGTCCTTGGCAGAACATGCTTTCATGATTCATTACTTCATTTGCAGGCAAACAGCTTCAGTATTCAGACTGCAACTTTTCTGAACATTCCTAGACGTGCAAATACCAATTTATCTTTATCTTTGCAGCAAATATACATACACATAAATTACCGGCAGACTGAAGCAACAAACTGACGATCAAGCTGAGTAACTTATGTTCTGGGAACTTTGCAAAAATAAATAATGTTTCCATATTCTTTTCTTTCATTGATGCAGCACATCCAT…
Seq_233528	Sobic.009G022000	Lr34	Triticum aestivum chromosome 4 clone BAC ABCT5; BAC ABCT33 map 4A, *** SEQUENCING IN PROGRESS ***, 7 ordered pieces.	Triticum aestivum	AATTCGATAATTCTAGCCCTTATACTTTTGAGAAATTTGTACGCCAAGAGCTATTGATTCATTAGGCAAGCACATATTTGAAAAAAAGAAGAAGAAGATGACAAACAGTGCGTACATATTTCTTAAAAAAAACAAAAACAATACGTTTACTTCTCGAGCTATACATTCGCTTCATCATCACTGCATCACAGTATCACAGAATTTATATAAGTTTCATCAACCTACTAATTTACTACTTTCTCTTATTCTTGCTCCCAACGAGCAAGACCACGTAGAAGAGCGCCCTGAAGAAGAAGCCCCACGCCACGGTCACCAGCAGGCACTTCCATTTCCCAATGTCCGTGACGGCCTGCGACGCCAGCACGTCGGCGCCGGTGGTGACGCAGGTGGTGGCCGTCA…
Seq_233580	Sobic.003G314700	Xa26	Oryza sativa (japonica cultivar-group) bacterial blight resistance protein XA26 (Xa26) gene, complete cds.	Oryza sativa Japonica Group	CGACATCAAGTCCACCAACATCCTCCTGGATGACAAGTTCAGAGCCAAGATCACTGACCTTGGCATGGCCAAGTGCCTGATGAACGACGGCGTGACGAGCTGCTCGAGCTCCCCGGCGCGGATGCTGGGCACGTTTGGCTACTTCGCGCCGGAGTACGCCATCGTGGGCAAGGCGTCGCTCAAGTCGGACGTGTTCAGCTTCGGCGTCGTCGTGCTGGAGGTCGCCTGCGGGAGGAGGCCGATGAGCTTGCTGGACGGCCAGAAGAACGCCGTCTTCCGGCAGATCGAGTGCTTTCTGGGAGTGACCAACAAGTGGAGGCATGGGGCATGTGTGCCCACGTGGCGTCCTATAATTGGTTGCTGTGAGAGGAAATGGATTCACACTCCCATTATCCTCCC…
Seq_233840	Sobic.001G085300	Cf-5	Lycopersicon esculentum disease resistance protein (Cf-5) gene, complete cds.	Solanum lycopersicum var. cerasiforme	GGACCGTGGCGGAGAAGAAGAAAGAGCTGGAAGGAAGCAACAGAACGAAGACCAGCACCAACCAGATCAGAGGAGAGGAGAGAAGCCAGCGAGAGATCAGAGAGTCACAGAGAGAAATTTGCCGGCAAAAACTTGCCTTCTCCCCTCCGGAATCTAGCTAATTACTTTCCGGTCCTTCTCCCCCATGTAAGTCTCCCCTCGTCGTCGCCTGCACCTACCGGAAGCGAAGCCTCCTACAGTTCAGGTCCACATCCAGGTCGCCGCCGTCGGCTAGCTAGCCGGATATGGTGGCCGCTCGCCGGGGCACGGCCTCCACCTGCGCGCTCCTGCTGCTCTTGCTGCTTCCGGCTGCGGTCTCCGTCTCTTCTTCCGGGTTGCGCCGTGGTCAGGACCAGGACA…
Seq_233862	Sobic.004G025000	PEPR1	Arabidopsis thaliana PEPR1 (PEP1 RECEPTOR 1); ATP binding / kinase/ protein binding / protein serine/threonine kinase (PEPR1) mRNA, complete cds.	Arabidopsis thaliana	CCGGCCGTGGGCGCCTGCTTCCCCTCCGCGCCCCGCCCCACCGCGCCAACCAACCAACACGGCGTCCCAACCTGCCGCCTATATACCACGCTCCCCCGCGCACATCCATATGCTCAGCTCCCCCCATCCCCGGACCCCGGACCCCGGCCATGGGCGCCTGCTTCTCCTCCGCCTCCGCTGCCCCCGCCGGCGCCGCCGACGAGCGCCGCCTGTCCAAGGATGACGACGGCAAGCGGGGGCGCCGCGCCGCCGGAGCCTCGCCGGAAGGCGCGGCGGCGGCCCCCGTGCGGGTGGAGTTCGGCTACGAGAGGGACTTCGAGGCGCGCTACGAGGTCGGCCGCCTGCTCGGCCACGGCCAGTTCGGCTACACCTTCGCCGCCACCGACCGCGCCTCCGGGG…
Seq_233948	Sobic.004G223400	RFO1	Arabidopsis thaliana RFO1 (RESISTANCE TO FUSARIUM OXYSPORUM 1); kinase (RFO1) mRNA, complete cds.	Arabidopsis thaliana	CAGCCAAGCTATGTTCTTATATATAGAACCTTATCTTTAATACAGGGACTTGATGTTATACCCTATATGCATCTACAAAAACATATAGAAGGATTCAAGCCATCATATAGAAGGATACAAGCCATCTGGTCTACAATACATTGTGCATATTACACATTATGAATATGTGTGATACAATCTCGTCCAAATATACGAAATTAAATGTAACCTCGAAATATATGATATTTCAGATGCAGCAGTATATAAGCAAGCCCTCTATAATCTTACCCTAATTAGTTAGCGTCGCTTAAACGAAGATACAAATTCTTGCTCCAAACTGTAGCATCTCGAGGTCTCTTGAGGTGGTATATGTGCATCATTAATAAGATCGATATGTTCAAGTGAGTTCTTAGATTTTCC…
Seq_234221	Sobic.001G302732	Bs3-E	Capsicum annuum cultivar ECW Bs3-E (Bs3-E) gene, complete cds.	Capsicum annuum	CAGCACTCCGTTCACGAGCCGCACGCCACGAAGGCAGGGACCGGGGTCCATGGAGGAGGAGGACCCAACCATCATCACTCGCCCAAGCGCGCGGCCGCGCCTCGCCTACCGCCGATGCACCACGGCACCAGTCCACGAGAAGTCAACTAAACGAACCCAAGGCAGATCTGAAGCCGAAAGGGAGCTCGGATGCGGCGGCGCGCTGAGGTGGCCGTGGTGGGCGCGGGCCCGGCGGGGCTGGTGGCCGCGCGCGAGCTTCTCCGCGAGGGCCACGCCGTGGCCGTCTTCGAGAAGTCAGGCCGCGTGGGGGGCACCTGGGCGTACGACCCGCGCGCGGACGCGGACCCGCTAGGCCGCGACCCGGGCGCCCCCGGCGCCGTGGTGCACAGCAGCCTCTAC…
Seq_234289	Sobic.006G257700	RPG1	Hordeum vulgare subsp. vulgare RPG1 (Rpg1) gene, Rpg1-Swiss Hv 489 allele, complete cds.	Hordeum vulgare	GTGTTTCAGGCCTACGCCGCACAACAGTTGGCTCTTTAAGTAGTCCAACGGCCATCCATGGTAAGTTAGCTCTTTACATTTCTTTCAAAATTAAAAACTTGATCTTTCTCGTCAAATTCCACATACACTGTATTTATATGGTGCATATGCCAACCATTTTATGATTACAATATAATCATATGCCCCATGTTCGTTCACCGATCCTACTTCCAGATCGTTACGGACATGTGCCCCTTTAATAATTATTACCAGGCTAATCTTTATAGATATCTCTATGTATATATAGTTTTTTCATGCCTCAAACACCCAGATAGCAAGGACAAAAGGCACATATATTCTATGCACAGTACACAATCACGCTGATCAGATCAGCAGCCTGCTGAAACCCCCCAATAACTA…
Seq_234308	Sobic.004G227700	Serk3A	Nicotiana benthamiana SERK3A (Serk3A) mRNA, complete cds.	Nicotiana benthamiana	AGGACCGACCCCCGCCGCCGCCGCCAGTTTATCAGCACAGCCGAACAGGACCTATACACTGCAGGTTGCTGCACGACGCTTTCCTCCCCCTCCCAACCATGCCGATTTAATGCCTCCGGGCTGCTGCTGCGCTGCGCTGGGCTAGGGAACCCATCTTCTCCCCCGCGCTGCCTGCCTGCTCGAGCTTGAAGATGGCGCTGATGAGGCGGTGCCTCTGTGGATCCGAGGAAGACTTCAGAGCGCTTTTAAGCATGGAAAATCTCAGGCTGTTCACCTACGGGGAGATCAGAGCAGCTACAAACAACTTCGATCAGAGTAACAAGCTTGGCCGAGGTGGCTTTGGAACTGTCTACAAGGGAGTTTTGAGAGACGGCACTGAATTTGCCGCGAAGGTTCTGT…
Seq_234417	Sobic.004G182300	Mlo	H.vulgare mRNA for Mlo protein.	Hordeum vulgare	TTTCCCTAGAAGTCATGGTATTCTAGAGATGCAACCAAAAACTTGCATACGACGACATCAAGAAATAAATCATAATGCTTGTAAATATTTGTACATTGTGCACCAGCATGTACAATCATATTTTTTTGCGAGACCCAGTTACAGACGCAAATGCTCATAAACACGAGCACACATTCACCCCTATGAACGCACACACGCACACCCTACCCCCTATAAACACCTCCAAAGAATTGAGTTGGACCACCACATCTCGAGATTGATAAAGTCATCACAGATGTCTCGTTGTTGATGGGCACGTAGCCTACCACTGAAAGAATAGCGTCGTTAAATTCTAGAATAAATCCAGGAAAATGCGGGCACCCGTGTCAAGTCGGGGACTTGAACCCGGATGGACAGGTT…
Seq_234550	Sobic.001G362001	Pid2	Oryza sativa Indica Group cultivar Digu B-lectin receptor kinase (Pid2) gene, complete cds.	Oryza sativa Indica Group	GAGGCCCGTGCTGCCATAAGCGCACAATTGCCTGAAACGGGGGAGTGGTTCGGAGCAGTTGGGGGCTGTGTTGGAACGGTTGGCCCAGGCCTCCCTTTCTACCCCTCTTCAGGCTATATGATCCCCACGCCTCCCGTGCCTGCCACTCTAACCACCGCACCTCCATCGGCATCCATCCACTCCCGTACGTACCTGAGCTCATTCCCTCCCTCCACCGGCTCACACGCTCGCTCGCTCCGAGCTAAGCTAGCTACTTGCCTACTTCCGGTAGCCTCACACGATGCCGAAGCCGTGGAGGCCGGTGCTGGCGTCGGTCACCAAGTGCTGCGCGGCAGAGGACGCGGCGGTGTCCCCGGACGGGCTGGCGCGGTGCCGGCCGCAGCAGTCGGAGCTCTCGCG…
Seq_234635	Sobic.003G182800	Xa13	Oryza sativa (indica cultivar-group) cultivar IR24 disease resistant allele XA13 (Xa13) gene, complete cds.	Oryza sativa Indica Group	CGAGGACCCTGATCGACCGGGAAGGAATTGGAAAGCAAACCAAAACCAACACGGGCGACACGCCCAGCAAAACAAGCGAAATCCCCCACCCCGGCTGCTGACAGACAGCCGCCCCCGCCCCGCTGCTGCTCGCGGCTCTGCCGCCGCGCCCGCTCCTGCCTCCGGCTAATATATACTCAGATCCGAGCGGAGCACGCCCGTGCTGCAGGCCTGCGGAGCAAGTATCTTCCCTCGACGTCCAGGCACCATGGATTGGGGTGATCCGGCATTGACGAGCTTCGTCGCCGACTCGTCCTTCCGCCACCTCTGCTGCTACGGCGCCGGAATCGCAGGAAACGTCTTCGCCTTCGTGCTCTTCATCTCCCCACTCCCCACATTCAAGCGGATCGTCCGGAACGG…
Seq_234752	Sobic.002G169200	RFO1	Arabidopsis thaliana RFO1 (RESISTANCE TO FUSARIUM OXYSPORUM 1); kinase (RFO1) mRNA, complete cds.	Arabidopsis thaliana	GGAAGAGATGCTCTCAGAGTCTTGGAGGAAGAAAAAGTACACTTGCCAAATGAACACCTCCGAGTCCGAGGAGTTACAATGGGCTTTCTTGCTCTCATGATTTTCTGTTTCTGCGGGTATGTGATTCTTCAAAAGAGAAAGCTGAAGAATACTAAAGAGGACTATTTTCGCCAACATGGAGGCTTAATTTTGTTTGATACAATGAAGTCAGAAAAGGGTCTTGCGTTCACGGTATTTAGTGAAGCAGAACTCATACATGCCACAAACAACTATCATAAGAGCAGAATAATTGGGAGAGGAGGACATGGAATAGTTTACAAGGGTATAGTTAAGGGTAACATGCCTGTTGCAATTAAGAGATGTACAATCATTAATGAAAGGCAAAAGAAGGAGTTTGGT…
Seq_234898	Sobic.003G168200	RFO1	Arabidopsis thaliana RFO1 (RESISTANCE TO FUSARIUM OXYSPORUM 1); kinase (RFO1) mRNA, complete cds.	Arabidopsis thaliana	CTGCACACCTGCACATCAATGCATGCACAAATAAGCTAAAGGAAGTATCAACACCATTACCTAAAGAATGCATACCATGTCCAATACTCTACTTTTAACTCCTTGGTCCATGCAGACTTACAGCAACCAAGAAAACAACTAATAAGATTTTGACGGTCAACTAACAAATACAAAGCACATCACTATTGTTTATTGTACAAAATCATTTATAAGACAATAAATGAATTTCATCGTTATGCATGACTGCACAAGTTCATCGTGGGTAGCTTGCCGACAATAATATTTCCTCTTCCATAGTGTATTGTCTACTTGCTTCGTAATTAGTTTTTCGTTCAGTTGGCATGAAATGAACTAGAGTTTCATCCTCATTGGTCCTTGGTGCCATAATGCATGGAACAT…
Seq_234899	Sobic.007G215900	RFO1	Arabidopsis thaliana RFO1 (RESISTANCE TO FUSARIUM OXYSPORUM 1); kinase (RFO1) mRNA, complete cds.	Arabidopsis thaliana	CTGCACACCTGCACATCAATGCATGCACAAATAAGCTAAAGGAAGTATCAACACCATTACCTAAAGAATGCATACCATGTCCAATACTCTACTTTTAACTCCTTGGTCCATGCAGACTTACAGCAACCAAGAAAACAACTAATAAGATTTTGACGGTCAACTAACAAATACAAAGCACATCACTATTGTTTATTGTACAAAATCATTTATAAGACAATAAATGAATTTCATCGTTATGCATGACTGCACAAGTTCATCGTGGGTAGCTTGCCGACAATAATATTTCCTCTTCCATAGTGTATTGTCTACTTGCTTCGTAATTAGTTTTTCGTTCAGTTGGCATGAAATGAACTAGAGTTTCATCCTCATTGGTCCTTGGTGCCATAATGCATGGAACAT…
Seq_234906	Sobic.002G194100	RFO1	Arabidopsis thaliana RFO1 (RESISTANCE TO FUSARIUM OXYSPORUM 1); kinase (RFO1) mRNA, complete cds.	Arabidopsis thaliana	ATCGAGATTACTAATGAGTATCTAATGTCATGAGATTACTTATATATGAACAATAACAATAAAATTTAGATTACTCATGAGATTACTCTAATGTCATGAGATGAATAATAAGCACAAGAATAATTAAAGTTCCTGTTCAGTAAACCAATATATCTCACATTAGTGTATCTAATCAAATATCTACATAATTGTTTGGACAAGAACAAAACAAGCCAAACTTGTGCATCATCGAGGATAGCTTGCTGATAACAACATTTCCTCTTCCAAGGTATATTGCCTGCTAACTTCCTTAATATCTCGATCAATTGACATGTCTTGAGATGTAGTTCCAACCCCACCAATTGGATCTGATGTGACATTATATGGAACCTGCCTCTTCTGAACTAGCAAGCTTTCAAG…
Seq_235071	Sobic.006G217900	FLS2	Arabidopsis thaliana FLS2 (FLAGELLIN-SENSITIVE 2); ATP binding / kinase/ protein binding / protein serine/threonine kinase/ transmembrane receptor > (FLS2) mRNA, complete cds.	Arabidopsis thaliana	CACGGCCTCCGCGCTCGTCTTTATAAGCTTGTCACTCGTCAGACTCCACATTCGATCACATGGTACCTTGGAGATAGTAAAATTGCAAGTGGAATGGCATCCTGCAAGAACACTTGCTCTTGCACTCTAGTCTCAAATGTCGCTGCGGTGCTAGCAATATCGGTCCTGGTCTTGGCGGCGCCGGCGGCGGCCTCCGTCCCCGACGCGTCCGTGTCCGTGCATCTCGAGGCGTTGCTGGCGTTCAAGAAGGCCGTCACCGCCGACCCGAACAGCACGCTGTCCAGCTGGACGATGGGGGCAGGCAATGGCCGCGGCGGCGGCGGCTTCCCGCCGCACTGCAATTGGACCGGCGTGGCCTGCGACGGCGCCGGCCACGTCACGTCCATCGAGCTCGCGGAG…
Seq_235195	Sobic.003G013400	Pid2	Oryza sativa Indica Group cultivar Digu B-lectin receptor kinase (Pid2) gene, complete cds.	Oryza sativa Indica Group	CTGGGATTCAATAAATTCAATGGCAAGAAAATCACCCTTTTTAGTTCTTTAGACCCCTATGGTATTGGGTTGACGTTTACTTTGTCACTAGATGCAACTAGAAGGCGAGGTTTTATTATCCGGCAGCATCCTAATGGTCGGATGTTTGCTGGTACCTTCCCAAGATGGATGGACATTCATGAAGATGGAGACCATATGCTAACATTCAAAGATGCATATACATACATACGTTTAAATGAATCTGGTTTTGTTACATTCGCTAAACAAGGGGAATGCGATTCTATTTTGTGGTCTGCCCCAGAAAGTTTATGTGAATATTCATATTGTGGACCTTACAGCCTTTGCACATTGTCGGGCTCTTGTATATGCCCTGTTGGTTTAAATTCACTGACCGATGGT…
Seq_235256	Sobic.009G249000	FLS2	Arabidopsis thaliana FLS2 (FLAGELLIN-SENSITIVE 2); ATP binding / kinase/ protein binding / protein serine/threonine kinase/ transmembrane receptor > (FLS2) mRNA, complete cds.	Arabidopsis thaliana	CCTTCCTCCGCTGCCGCTGCCGCGCTCCTAATAATTGCATCGCCCCCCGTGCCCGCCCTGCTTAATCCTGCTGCAGCAGTAGCCTATCCTGCCTGCCACCTCGCTGCTTATATCACCAGCTACCTCCTCCCCATCACCGCCACCGCCGACAACTGCTGCTGCCTTAGCGCGTAGCCTGTGACTGAGAGCACCGTACCGGAGGCGGGCAGGCGAGCAAGCGCAGAGCAGAGGCAGGGGGGCGCGCGGGATCTTGTCGGTCGGTCGGTCGGCATGAAGCTCCCGCTGCTGCGGCCGCTGTGGCCGTGCCTGAGCCCCGCGGCGGGGCCGGCCGACGCGGCGCCGGAGCCGGCCAAGCCGTCGCTGCCGGCCACGTGGCTGCTGCTGCACGCGCTCTTCTGC…
Seq_235362	Sobic.004G176900	Serk3A	Nicotiana benthamiana SERK3A (Serk3A) mRNA, complete cds.	Nicotiana benthamiana	GATCTCCTTTTGGCTAGTTGCCTTTTTATATTGCAAAAAAATCATCTGGTAGCAATCGGAGTCATGCTTGATCCAGTTATATTATGATGCTATGGAGTGCAGAAAACAGAATATGACCATCAACATCCTTCACAGGGAAAAGTGTCTATAAAATGAGATTCAATCTAGGAGGAGCTAGGTGTACAAACTATGACACCTGGTTGGCTAGCCATGGAGACAAACTATAGCCTAGCTAAATGCAAGTGTGGGGATGAGTGAGGTTCCAATAATGCTCCTAAACACAGGCACACACAAAAAAAAAATACAAAAAAAGTCCGGAAAATGGAAAGAAACTGCATTACATGTTTAGCCATGCCAAAATCAGCAAGTTTGACTTCGCCATTTGGGCCAACAAGTACG…
Seq_235471	Sobic.005G038800	xa21	Oryza sativa Indica Group Xa21 gene for receptor kinase-like protein, complete cds, cultivar:II you 8220.	Oryza sativa	GACAAATGACAAGTAACAATACTATGATGACTACCAAATGTACAACTATTTGATGCAGAACTATTTTATATCCCATAAAAAAACTATTTTATATCCTCTAGAATCACTTATAATTGTACACCTTTCTTTTTTTATCTAATATAGTAACCATAGTAGGGGGCCCAACCCCTCCTGATCCTTTTAAAAAAAAAGAGTGAGATAATGACGAACCACTTCATTCCATAAACCAAACACCCCCAATTTCGTGCAATTCGGCAGCCGCTTCCCTCATGTTCATTCGATCACCCAGGGCGTCGCAAGTGCAGGAAAGTGCCACTTTCACCAGGGCCACCAAGCACCGGAGGACTCTGCTTTCGTCTCCTGGATTCGCTCCTCGAGCACACTCCTGGTATTCTTCTA…
Seq_235498	Sobic.005G205300	xa21	Oryza sativa Indica Group Xa21 gene for receptor kinase-like protein, complete cds, cultivar:II you 8220.	Oryza sativa	TGATGCTTAGAGAGTTAGGGGTCACATAAAAAACATGTGGTGATTCTGAACTAAAGATGCGGTGGTAGAAGCGGTCATGTGTACTGTTATTGACACTTGGTATTGTTTTCCAGTACAACACTTAGTACTATAGCTAGGGTTGACAGTACCGTTTCCAAGTACTGCACCTGTGTCTTATACTAGGAAAAGTACTAATACTTATTTGTCCCTGGCTACATATTTATTTGATCAACTGCCTTGTACAGATCTTTTTCCGTATGTGAAGTGCAACTGCTATAGAGGTACTATGTGAATTACAGTAACATAGATACACTTCCCCATGAGCACAATGTTGAAAATTCTTCTTTGATGGCCAAGATTTCAGCATAGAGCTCCTCTGTTCTTGGCCGATCCTTGGGT…
Seq_235656	Sobic.004G286000	Serk3A	Nicotiana benthamiana SERK3A (Serk3A) mRNA, complete cds.	Nicotiana benthamiana	GGGGTACTGTACACCGCAAATACGAGACGAGAAGTAATGAGACGTGTCTCTACATTGGATCTTTGCGCGCTCGACAGGACACAGGAGAGAAAATGCTTTTGCTCAAGCTCAAACGCTCTCCAACGTACTACAATGGCAAGCATTTGTGGCTATCTTGTCACTCTAGCAGGCGTGTGGGTACTGTGGCCACCGCCCGGAGCCGGGCCAGCCCAGTCCAAGCTGGACCCCGACCCCGACCCGGGGCGCTGGCTGTGCCCGTTCCGCGCCGTGGGGGGGCGCGGGGACGCCGAGCCATCCAGCCTCGCCGCCGCCGCCCTGGACGACATGGACTCGACCTCCTCGAGCACCGCGACGACCTCCCGCATGGAAGGCCGGTTCTTGTGGTCGGCGGCGAGGCAC…
Seq_235887	Sobic.008G167200	RPG1	Hordeum vulgare subsp. vulgare RPG1 (Rpg1) gene, Rpg1-Swiss Hv 489 allele, complete cds.	Hordeum vulgare	AGGTAGTCAATAATTCTCCCTACGTTTCATGTGTTAGCTTCCTTTCTTTCCTTCTCTTTCCTAATTTCTACCTACCTTTTTTTATATACACAAACTAAACAAATCAGTAATCAGTAGGCCGTCCTGTTCGAGTTTGCAGCTCTGGATCATTTGTCAGTCACATAGGAATACAGAATATACTTCCTTTTTTTTTGGTGCACGCCGAGGTATGGTGTCCAGGAGCCAAAAATCTGCACCCACATCCACATGCCTGCTTTTGCTGCATCAGAAGATCCTGGCTTAGCTTTTATCTAAATGTTATTGTTGTAGTCAAATAAAGCTATTGTTGTTTTCCACACGATTGAGCCTGCTAATTTTTAGCAGTGTTTCCTGAATAAAGCTCACCTTCTGTTTGGCACC…
Seq_235898	Sobic.005G063600	RPG1	Hordeum vulgare subsp. vulgare RPG1 (Rpg1) gene, Rpg1-Swiss Hv 489 allele, complete cds.	Hordeum vulgare	CACCACTGCCCAGCAGCGTCCCAGTGGGAACACGGTAGGCAACCGGCCCAGTGCCCCCCTCCGCGTCGCCTCGCAGGGCGACTGCCGCCGCCAGCCCAAGCACCCTCGCTGCAGTCCATCCTCGGCCGCTGTTGCCGTTGTCTAGTGCGTGGTGACGGCGTCCCGCTGCTGCTCCAAAAAAACTGGATACGGTTACATGTGAGAAAAAATGGATTGTGAAGCTAGTGTGCACAATCTCTTGGAACGCATGGTAGTTGATGAAAGCATAGAGCCGACAAGTCTGCCACTAGCACTTCTAAAAGCCATCACCAATAATTTCTCAGACAATCAGCAAATTGGCAAAGGGGGGTTTGCAGTTGTTTACAAGGGACAGCTTCAGGGTGGCACAGTCGCTGTGAA…
Seq_235906	Sobic.005G210200	Serk3B	Nicotiana benthamiana SERK3B (Serk3B) mRNA, complete cds.	Nicotiana benthamiana	AAAAACAGTCTGCCGAACAGGGCCGATGGTCTTACAGTACAAACACACCAATTATTGCGATAATGAACAGATTGCAGAGATCCTAACCAAAATTCTGTTTCAGGGCGGTGGCATGCTATAGTACGAGCATTGCCCTGAAGCTTATGTTTTGGTACAGTACTACAGACAGTGTCATCCATGGTTGCCCGCTCAGCGAAAATGGATGGCATGCAACAAGCTCCCCCCGAGTTGCCAAAACAAGATAAGCTATGAGCTCCTGTGCACCATTTCAGCCCTGAGGTAAGCTGGATGCTGAGGTGTAGGAAGCGCAAAAATGTGGCAGCTTAACATCAGAACAACCTCCTGCATGGTGGGCCGGTTTGCAGGGTTCTCTTCCACGCACAGCAGTGCTATCTGGAT…
Seq_236031	Sobic.005G053100	Pit	Oryza sativa Japonica Group Pit mRNA for NBS-LRR disease resistance protein, complete cds.	Oryza sativa Japonica Group	GCTCAAGTAGAGTAGAGCAGAGCCTGCAGCCCAGCACACAAACCCTGACTACAATAGTACTACGACAAAGAGAGAACCCAGGTCCTCTGTTCCTCCGACCACAGCAAACACATCTGGCGATCACAGGAAACCCTGGCCACTGATCTGAGGACACAGTTGCCTCCCAGCTAGCAGTAACGTGGATGCCATGCTCTTCTGGTTGTGCAAAGGTTGGCTATCACTTCTGCATTTCAAGAAGGTAAGGCGTTTTTATCGTATCTCTTCTCCATGCTTTTCACTGGCTAGATGTGAGGCATAATATACACTGAAAACTATTATCTGAAAATTACTATCGATATCGGTCATTGCAAATTGTAGAAACTATTATGAGTACATGGGCTACTTTTTATGATCTTATCA…
Seq_236044	Sobic.009G246300	RPG1	Hordeum vulgare subsp. vulgare RPG1 (Rpg1) gene, Rpg1-Swiss Hv 489 allele, complete cds.	Hordeum vulgare	CAAGGTACTTCTTGTTCTTCACACCCCCCTCCGCCTTTCCCTTCTTCCCCCGCTCCGCCTGCCTGCCTTCCCTTCTCTCCCATCCTCGAGGGCGCTGCACGCGGTGCGCGGCGAGATCGGGCGGAGGAGCGACCCCTTCGCCGCGCGGCCACCGTCCCACGTCCTGGGGCGCTCGGGGGCTTGCTCGCCCCCTGATCCCGCCCGCGCGCGGCGTCTCGAGGGCCGGCGGTGCCGCCGCCGCAGCGTAGGCGGGTGCTGAGTGCGGCGGAAGCGAGGGCCGCGGGGTTTTCATTTGGCACCGGCGGTGGGGCGGGAGATCCGGCTAGCGGGGATGCAGCAGGACCAGCGGAACAAGACTTCTGCAGAGGCCGAATTCTTCACAGAGTATGGGGATGCAAA…
Seq_236053	Sobic.006G087900	Serk3A	Nicotiana benthamiana SERK3A (Serk3A) mRNA, complete cds.	Nicotiana benthamiana	GCCGTTGGGCATGTACTCGTACACGAGGATGCGCTCGCCGCCGTCGGCGCAGAAGCCGAGGAGGCGGACGAGGTTCTTGTGGTTCACGCGGGAGAGCAGCGACAGCTCCGAGACGAATGCCACCTCGTGGTTGTTCGCGAGGCGCGCCGCCACGAAGGAGGACGCCGCGCCGGAGTCGCGGCGCTCCGCGCGCTTGATGGCGACCTCGCGCCCGTCGGGGAGGGACGCGCGGTACACGACGCCGAAGCTGCCGGAGCCGATGCGGTGGGACGGAGAGAAGCCGTCCGTGACGGCCCGGAGCGCCACCAGCGGGAACTGCTCCACCGTCGTGTTCGGGCCCTTGGAGAGCAGCGCGCTGAGCCGCCGCTCCACGCGCGGCGCCGGACCAATCGGCTCGGC…
Seq_236080	Sobic.006G168500	RPG1	Arabidopsis thaliana RPM1 (RESISTANCE TO P. SYRINGAE PV MACULICOLA 1); protein binding (RPM1) mRNA, complete cds.	Arabidopsis thaliana	TCTGTACCATGCTCATGCCTATTTATCAGATATGCTGCTGTCTCAACCCCAAAGATTACTGACGCATAAATATCTGCACCAAGATTTGATAGGGCTTTATCCTAGAAAAGGGACAGCATGAGTCAATGACCCATAGGCGATAGGCCATTGCTTCAAAAAACAGATATAAATCAACTAGTGTTTACAAAAAAGACTATACAGTGTGCACTCGATCATATGCATGATCAGAGCAGGACACAAATATATAGAAACAGACACAAATATGCATGATCATAGGACTCCTTCCAATGTGTTTATCAGGAACAAAACACGCTAGTTAACAGCTGAAGAGATCTGTTCTAGGCATATCGTTGTAATATGTCTGCCATATTGGTTGGTTCTTGGTTGCCACAATGAAAT…
Seq_236097	Sobic.004G195800	Pikm1-TS	Oryza sativa Japonica Group Pikm1-TS mRNA for NBS-LRR class disease resistance protein, complete cds.	Oryza sativa Japonica Group	TTTTTTTATAACACATATAAGCAAACTTTCATTTGAGCAAAACCTCCAGTATTGTTGAAACTGTGAAGTGAAAACTGTACGATTGACGAGTGCGTAGCATGTATGATACAGCGTACAGGGTCCCAAAGCCGTACATATATTTCTCTCAAAAAGAAGGGGAAGCATTCCGTACACAAACTACACATTGCACACCCTTTTTTCAATATATATATATACACACACGCGCGCACACGTTGAGACGGTAGTAGCCCCGTCTACATAATGGAGCAGGTGCCGCCCGGCCGCGAGTACCCGTAGGGGTCGTAGTCGTAGACGACGCCGGCCGGCGGCGGCGGCGGCGGGTAGGGGTAGTAGTACTGGTTGTAGTACGCTGCCACAGCGTCGGCGACGGGGTCGGGC…
Seq_236293	Sobic.009G033100	RFO1	Arabidopsis thaliana RFO1 (RESISTANCE TO FUSARIUM OXYSPORUM 1); kinase (RFO1) mRNA, complete cds.	Arabidopsis thaliana	AACAACTCCAAAGCTATATACATCAGATTTTTTGTTAAAAAGTTGACCAGAAACATCCCTTGGGTCTGAATAATACTTTTTGGGTCCATTGTCATGAATAGGAAAAACGGTATTTTTTTGTGCAACTGAAAGTCCAAGAAATGTTGACAAGTTCACATTGAAGATTTTCGGCACAAAGTTCTTGTCCAGAAATATATTGGCAGATCTGAAGTTTCCAAAGAGGCTGGTACCACATGAATCAGGATTTTCAGCTGCTAATGAATGGATATGAACCAGGCCCTCTGCACACTGGACTGCTATCAACAGGCGCTGATGAAGCGGAAGTTTTTCCATGGAGCAGATAGTGTCATATAGGTTTCTGTTAGATAACGATATAGAGCCAAACCTTGTCTTGGATAG…
Seq_236329	Sobic.002G021900	RFO1	Arabidopsis thaliana RFO1 (RESISTANCE TO FUSARIUM OXYSPORUM 1); kinase (RFO1) mRNA, complete cds.	Arabidopsis thaliana	GTTGCCACATAAGATGGCGCCACAACCTAGTACGTTCAGCACCCCACAGAAAGCTTAGGTAGCTAGTAGCTACTCCTACATACTGCCTAGATCCGATGACGAAGTACCCAACTGCAGTGCTTCTACTCACCATCTCTCCTCTCCTGCTCTGCCGCCCGGCAGCAGTATGGGTCCTAGCCGCCGCAGCCGACGACGTGACGCCGGCTCACCGGCTAGGCTGCCAGTCGAGGTGCGGCGGCGTCAACATCCCCTACCCGTTCGGCATCGTCGGTGATGATCATCGGTGCGCCATCCACACCGGCTTCGACGTCAACTGTACTCGCCTTGCCGACGGCACCTACAGGCCTTTCAACGGGCCGTTCGAGGTGACCAACATCTCCGTGCCCGACGCCAAGGCTT…
Seq_236332	Sobic.002G022900	RFO1	Arabidopsis thaliana RFO1 (RESISTANCE TO FUSARIUM OXYSPORUM 1); kinase (RFO1) mRNA, complete cds.	Arabidopsis thaliana	GTTGCCACATAAGATGGCGCCACAACCTAGTACGTTCAGCACCCCACAGAAAGCTTAGGTAGCTAGTAGCTACTCCTACATACTGCCTAGATCCGATGACGAAGTACCCAACTGCAGTGCTTCTACTCACCATCTCTCCTCTCCTGCTCTGCCGCCCGGCAGCAGTATGGGTCCTAGCCGCCGCAGCCGACGACGTGACGCCGGCTCACCGGCTAGGCTGCCAGTCGAGGTGCGGCGGCGTCAACATCCCCTACCCGTTCGGCATCGTCGGTGATGATCATCGGTGCGCCATCCACACCGGCTTCGACGTCAACTGTACTCGCCTTGCCGACGGCACCTACAGGCCTTTCAACGGGCCGTTCGAGGTGACCAACATCTCCGTGCCCGACGCCAAGGCTT…
Seq_236413	Sobic.009G208100	Serk3A	Nicotiana benthamiana SERK3A (Serk3A) mRNA, complete cds.	Nicotiana benthamiana	TTGCAGTCCCAGGCTATTATTGTTGTGCTTGTGCGCATGCCCTTTCTGATTAATCCTCAGGAGATGCATCCTATAATACATAAAACAGTAATCTTATCTGATGAATGTGCACTTCCTGTGACATCTAATTACTGCCTCTCCTGTTATGTCAGAGTTGACACTGGTATGTCAACGGGCAAACTTTCTTTTCAATTTTCAATGGGACATTTCTCAGTCTGGGTATCATGCTAGCAATATCACCTTACAAAGGGATAACATGTCCAAGGACTAAAGAAAGGCCAAAATTTTTTCGCATCATCTAATTGAGGAAGTAGGCCTGGGGCTCGCCTGTGGCCTCTTGTTTAGGACCTTAGGTGACAACCGTCTAGGCAAACCAGGACATGCCTCTAATGTCTACAT…
Seq_236443	Sobic.005G056600	PEPR1	Arabidopsis thaliana PEPR1 (PEP1 RECEPTOR 1); ATP binding / kinase/ protein binding / protein serine/threonine kinase (PEPR1) mRNA, complete cds.	Arabidopsis thaliana	CCGATCGTCGCCCCCCACTTCGCGCCCTCTTCCTCCTAGCTCCTGCTCCTTCCTCGCCGTGCCATGTCAAACTCATCAACAGCTAGACCCGATCATTGCCCCCCTCGGTCCCAACTGCGCGTATCCATTCCGCGGCAGCCCAGCACAACCGCCTCAGGTCCCCCCGCCTCCTGCTGGATCTCCTTTTTGTTCGCTTCTTGGTCCATTCATACTTCCCCTCACGCACGTAACGAGGGATCGGATCACGCGTTTCCACCCTCAGCTCCTGCCCTTTTGTTTCCCCCCGCTTCCCCTATTCATGCTCATGCTCTCATCACGTCTTCTTCTTCTTCGAGCTAGTAGCTGCCTATCATGGCCATGGTCGAGCTGCTGTCCCTCTGCTTGTAATCCTCGGTCCTC…
Seq_236627	Sobic.003G097000	Pid2	Oryza sativa Indica Group cultivar Digu B-lectin receptor kinase (Pid2) gene, complete cds.	Oryza sativa Indica Group	AATGAGCTTGCATAGTCCAAAATCTGAAAGTTTGGCATTGAAGTTTTCATCTAACAGGATATTTTGTGGTTTGACATCCAAGTGAGCAATCCTCTTGGAGCACTCCTCATGTAGATAAGATAGACTCTTCGCAATGTGAGTAATAACTTGGCATCTAGTTTTCCAATCAAGAGAGGGAGCATCATTCTCATGTGAGTGATAGATCCACCTGTCCAAGGACCCTTTGGGCATATACTCATACACCAAAAGCCTATGTGATTTCTCTGCACAGAAACCTATCAGCCTGACCAGATGGATGTGATGAATGCTCCCAATTGTCTGAACCTCCGCTAAAAATTCTCTCTTACCCTGACCAGATCGCTCCAAACGTTTAACCGCAATTTTTTCTTCATTGTATTG…
Seq_237237	Sobic.007G188800	Rdg2a	Hordeum vulgare subsp. vulgare cultivar Thibaut RDG2A (Rdg2) gene, Rdg2-a allele, complete cds; retrotransposon HORPIA2, complete sequence; and NBS2-RDG2A (Nbs2-Rdg2a) and NBS3-RDG2A (Nbs3-Rdg2a) genes, complete cds.	Hordeum vulgare subsp. vulgare	CGACGGGGACTAAACTTGTGGAACCAAACGCGCCCCGCCCACCTCCGTTCGGAGGCATAGCGATTCCTACACACTGCAATAAGTTACTAACAGATTCCTGCGACATTTTGCCAGTGTACTGCAATCTGGACCTCGCTCCAGAAAATCAAAACAAATCAAATCTGTTAAATACAATTTTATCTCTCCGTTTATTTTTTGTGATAGGTCGTCGCCGTCAGTTACTCGAGGCCACAAGGCGAACCAACTTCACAACGTCGACAGATGAGAGGAAGCAACTACACCTGGGGTTTTGTATCGCGGAGACGGGCCAGCATGGTTATTTCAGCGCATATAGCAACCGATGCGATCACAGAGTTGATAGTCCGCGTGCGATTGCTGTCAACAACCGCCGAGGCCAGC…
Seq_237436	Sobic.001G427900	Asc-1	Lycopersicon esculentum ASC1 (Asc) gene, Asc-1 allele, complete cds.	Solanum lycopersicum	ATTGAATTAGATTAGTTCAGAGTACATTTCATTGTTTTATTCTACTAGTATTGAAGTCTAATTTGAGACAATATCGTAACCAAATTGGATCTAAACTATACCTCTATCATATTGCGTAGATTAGGGATAACACCATTCAAAAAATTATATAGCTGCATAAAGCTCAATGCACATCACATGAGATCATTAAGATACAGGTGAGATTTACTCCCAATCAAAAGAATCAATTTATTACCATCAATTAGAACTAAATCTACTCACAGGTGAAGTATATTGAACATGCTACAGAGGGGGTTCTTCAAGCTTCAGGAAAAAGCCCGTACGCCCTCTCATGTCTTTCCCCATATCAAAAAAGGTGAACCAAAAATTTTTGAAGGAACCTTCAAGTAAGCTCGCTAG…
Seq_237524	Sobic.010G138500	Pid2	Oryza sativa Indica Group cultivar Digu B-lectin receptor kinase (Pid2) gene, complete cds.	Oryza sativa Indica Group	GCCATCCTTCACTAAGTCGGCCAGTATTAATTTCCAAATCCTGGTATATACACCTGATCATAGCTTCGACATTAATTTGTTTTATTTTTTTGGTGTACAATTGCAAAATTGCGAACTGAGTTTTCTATCTAAGGGGTGAAATTGTGCCCCATATGGGCATTTCAGAAAATTTGAACTCAACACCTCAAACTTTCAACATATATGTACATGACTACGAACAAACGAACACCAAACGAATGGCCTTCCCCAAAAATTGGACATCATCAAATTCATCACCATGCTAACTAAAGCAGAGCAATGTAATCATATCACCTGGGCCCAGAGAGCCGCACAGCAGAAAGCAAAGCATCACTGTTGTAGTCTGACATCCCAGATGACGTGCCCTCTTCGGTGCTAGAT…
Seq_237617	Sobic.004G126000	RFO1	Arabidopsis thaliana RFO1 (RESISTANCE TO FUSARIUM OXYSPORUM 1); kinase (RFO1) mRNA, complete cds.	Arabidopsis thaliana	TATACATCGTGACATCAAAAGTAGCAATATCTTGTTAGACTGTGATTTTAAGGCTTGTGTCTCAGACTTCGGCATGGCTCAGACGTTGAAGCATAGTTCCTCAAGTTGGAGCACCATCTTTGTAGGGACATGTGGTTATATAGCCCCAGAACTGTCATCCACAATGGTGTTTACAGAGAAGTGTGATGTCTATAGCTTTGGTGTGCTCACCATGGAAGTAGTCATGGGTAAGCACCCAGGAGATCTGCTACTTCCATTCTTCTGCCGAACAGAGCAGCATACTAAGCTCAAGGATATATTGGACCATCGCATCACAGTACCAACGAGCGACGAGGAGAAAGACATCATCCTGCTCATGCTGGTGGCCTTTGCTTGTCTCCAAATCTGCCCAAAAGCCAG…
Seq_237666	Sobic.010G249500	RPG1	Hordeum vulgare subsp. vulgare RPG1 (Rpg1) gene, Rpg1-Swiss Hv 489 allele, complete cds.	Hordeum vulgare	GTCCGTCTTTCCAGCTGCTTGCTCCTAGCCTTCTCGTCTCGTCCTCCACCCGCTCGCCCTTTCCCCTATCCACGAGCGAGCCACCGCAGCAGCGCCAGCAGGATGCCGACGCTGAACCTGAGCACCAACGTGCCGGTGGACGCGGTAGTCGCCGCCGACATCCTCAAGGACTGTTCCAAGGCCGTCGCCAGGATCATCGGCAAGCCCGAATCCTATGTCATGGTGTCGATCAACGGGTCGGTGCCCATGTCGTTCGCGGCCAGCGAAGAGCCGGCGGCGTACGGCGAGCTCGTATCAATCGGCGGCATCGGCCCCGGCGTCAACGGGAAGCTGAGCGCGGCCGTCGCTGAGGTCCTCGAGACCAAGCTCTCCGTCAGCAGGTCCAGATTCTACATCAAA…
Seq_237765	Sobic.001G108400	PEPR1	Arabidopsis thaliana PEPR1 (PEP1 RECEPTOR 1); ATP binding / kinase/ protein binding / protein serine/threonine kinase (PEPR1) mRNA, complete cds.	Arabidopsis thaliana	GCGCAAGGAAGCAAAAACAAACCCTTTCCATTCAAAGCCCCCGAGAATTTCAAAAAACATTTAACAGCTTCCTCCTTCCTTGCGCAAAACAAAACCCCGCAAAACAAGCATCGGCTTCGTCCCTCCTCCACTTCGTCTCTCTCTCTTCCCCAGCTCCGGCCGCGCCCACCGCCGCAGCCAGCGCGTGTGCTGCTTGCTCTGCGCTCCCCGCCGTCGCCGTGGCCGCGGGCGAGCTCGAGAGGTGCGGAATTTGGGTGCTGCTCATGCTGGGTTCGAATCGGAGGAGGGAGAAGTGGAGGAATAATAATTGGGAGGCCGTTGGGGGAGTGTAACTTTGGGCATTAATGGCGGGGTGGTGAGAGACCCCCAGCCCAAGGGAGGCCTCTCTGTCTCTGGTGG…
Seq_237766	Sobic.001G480800	Serk3B	Nicotiana benthamiana SERK3B (Serk3B) mRNA, complete cds.	Nicotiana benthamiana	CTGAAATAGCCATTTTGAAAGTTCAAGAAGAAAATAAGCTCAGGTGATAGGACTAGAATGACTATTCCACCGTGCAACTTGTTTCAGTTGATGCAGCAGCACTAACTACTTGATTATTTAACATTCGACAAACTTGACACTATAGTTTTGTTTATCTGGGGCATTTGCATATGATCTACCCAAAGAATATAACAGAATGTCATTAGTGTAAGATCAAGGTACTATTTCGTTGACACAATACAACCATCAACCATAGAGCACAACACCTTTGCTACCAAGAAAAACCTGTGATTATGTACTGGCGAAGCTGACAAAGTTCTGTTTCTTCCACTTGTGTGATTATGTCTCTGCTGGGCGCTAGTCGAACGAAATAAATACAATCTGAGAAGCAGCTGAAAG…
Seq_237800	Sobic.003G027800	Pid2	Oryza sativa Indica Group cultivar Digu B-lectin receptor kinase (Pid2) gene, complete cds.	Oryza sativa Indica Group	GTGCCGACTAAACAAGGCTCTTCTCACAAGTGGCTGCTACTTGCATGTTTACCATTCGTCCTACTGTCAGTACTTGAGAGAAAGCACACGCTTCTCTTTCGTCTCCCAGCATCCCCACAAAGCGGCTCCTAGCTTGCTACGTTGGGAGCTCAGTCACAAAACAGAGCAGCAAAGCAGAACCATGAGGAAGGAGATCATAATCCGGATTCATGTGAAATCCGACAAGTGCCAGGCCAAGGCCATGAAGGTGGCAGCAGCCGGCAGCGGAGTGGAGTCCGTGACGCTGGCCGGCGGCGACAAGAGCCTGCTGCTGGTGATCGGCGACGGCGTGGACTCGAACAAGCTCTTGAAGAGGCTCAAGAAGAAGGTGGGCGAGGCGGAGATCGTGGAGCTGAGGAC…
Seq_237805	Sobic.001G190700	Lr34	Triticum aestivum chromosome 4 clone BAC ABCT5; BAC ABCT33 map 4A, *** SEQUENCING IN PROGRESS ***, 7 ordered pieces.	Triticum aestivum	CCGATCTGCTGCACGCCCAACCCGGCCAGTTTGGGCGATTAAAAAAAAGAGACAACCTCGAACCTTCCTCGCTCTCCATCCGTCGCCCAGCCAGCCAATAAATAAAAAAAAATGTAACTATCAGTTGATTCCGTCCGCCCGATCTCCAATCCAAAGGCTGACATCTCCTGCTCCTGCCCACCAAACGTGCAGGCCCCAGAAATATCTAGACAGCCTCTCCTCATCCCGTTCTCTCTCTCCCGAACCTTCTCCGTTGATCCGGCCCCGGTCCCTCTCTCTCGAAACTTCTCCCGCAACATCGGCCGCTCCAACCCCATCACAGCGCCGCCCCTGCCTCCGGCGTTGCCTCCCACCCCGTGTCCGCGCCCTCCTTCCACCCCGACGCCGCCACGGTCTCGC…
Seq_237870	Sobic.010G174500	RFO1	Arabidopsis thaliana RFO1 (RESISTANCE TO FUSARIUM OXYSPORUM 1); kinase (RFO1) mRNA, complete cds.	Arabidopsis thaliana	GCCTGGGACGCTCGAATTTCTGGCCGTTCGATGGTTGCATCTCGCACGCCCAGTCCCAGCGGCATCGCTCGCACGGTCGCACCCGCACAAGCGCACGCCCGCCGCCGCCGTCGCATCGAAGGAACCCCGCCCGGCCGTTGCTTCCCCGCCGCTCCCGCCGCCGCGGACCAGCACCAGCTCAGCTAAGTTGACTTCGCCAGACGCCACCTCCTCCGGCGCCGCAGGGAGGGATGGAGGGTTCGTCTTCGTCCTCGCCGGGCGACGGCGGGGGCTTCCAGTTCCAGGTCCAGGTCGCGGTGGCCGTGCGCGGGGACGGCCGCGCCAGCCGCCGAGCCGCGCGGTGGGCCGCCGCCAGCCTCGTCCCGGCCGGCGGCCGCGTCGCGCTCGTCCACGTCATCC…
Seq_237874	Sobic.010G219100	Pto	Lycopersicon pimpinellifolium Rio Grande-PtoR protein kinase mRNA, complete cds.	Solanum pimpinellifolium	CTTGATTTCTTTTTTTCCAACCCTCTCTCGGCTCTGGCACAGCTAGTTCCGTCTGCTCGCCCTTTTCTCCTCATCTCCTCGCTTTCGCTTCGCCGTTCCAACGCCCCCACGGAACATAAAGGCCATGGTAGTGGATTAAAACCACGCGCCCGAGGGGAGAGGGACAGGTTGGTGGAGGACGCGCACCCGGGGTGGAGAGCAGCAGGAGTTCCTGCGGCGAATTCGGGCCGCGAGTGGGCTGGTTCAGGCGGCGGCCGCCGGTGGAATTGTGGCAGACGAGGTGGCCTGTTGGTGCGGCGGGAGTTTGCGAGTTGGGCGGTCTCGGTTGGTGAGTGAGCGAAGGTGTTGTTGGGCGCGTGGATCTGGCCGGCGGCGGGCGATGGGAAGGAGGGACTAGGG…
Seq_237934	Sobic.006G086500	ER - Erecta	Arabidopsis thaliana ER (ERECTA) (ER) mRNA, complete cds.	Arabidopsis thaliana	CGGGTAGATTAGTTCTTTACACTGGTCTAAGTTACAGCTTTTTTCGATGAAAAAAAATATAATATGCACCCCGCTCTCTTTTTTTTTCAATTACCTAATTGAATCCAGAGATGAAATGGAAATGGAACGGTACATGTATCTTACTCCGATTCATTCGGAAAGACATGGTTACATCTGCCATGGAAGTCCCTAACTACTGCTACTTCACAGAAATATCAGGTTGCACAAGCTTACGAATTTACATCCCGTAGTCATCTGTAAGATTCTGTGAGGATTTACATCAGGACGTATATGTACGTATAACTATGTATAGCAAGAACGACAACAAACCTTAAAGCCTACGAATATACAGAACTTCCTGTTACAATTTCTCAAGAGCCCCATTTCGCTGTACTGAAC…
Seq_238129	Sobic.007G225900	RFO1	Arabidopsis thaliana RFO1 (RESISTANCE TO FUSARIUM OXYSPORUM 1); kinase (RFO1) mRNA, complete cds.	Arabidopsis thaliana	CCAGCGGCGGTGCGGCGACCTGGACATCCCGTACCCGTTCGGCATCGGGCGCGGCTGCTACCACTACACGGGCGACGGCGACATCACCTTCGAACTCACCTGCAGGCGCACCGCGGGCGGCGGCTACCAGGCCTTCAGCGGCAAGGACGTCGAGGTCATCGACGTCTCCGTGCGCCGCGGCCAGGCGCGCGTCCGCAACGGCATCCAGCCCTGGTGCTACAACCGCACGTCGCGGTCCATGGGCGACAACAGCCTGTGGTGGACGGACCTGTCCGACTCGCAGTTCCGGCTCTCCAACGAGGGCAACCGCTTCGTCGTCGTGGGCTGCAACTCGCTGGCGTACGTGCAGTCCGTCAACACCGGCACCGTCTACATGACCGGCTGCATGGCGACGTGCCC…
Seq_238130	Sobic.002G249600	RFO1	Arabidopsis thaliana RFO1 (RESISTANCE TO FUSARIUM OXYSPORUM 1); kinase (RFO1) mRNA, complete cds.	Arabidopsis thaliana	ACCCAAGAACGGCTCATGCTCCGGCACCGCTGGCTGCTGCCAGGCGGAGCTCCCGAGAGGCGTCCAGTATTACGAAGGCTTCTTCAACGAGCTCTACAACACCACCCAGATATGGAGGAAAGCCCCCTGCAACTACATCACCGTGATGGAGAGCGCGGCCTTCAACTTCAGCACCACCTACCTCACCTCGACGGCGTTCTACGACGCTGACGACTCGAGGACCCCGGTGGTGATGGAGTGGGGGATTGCACGGGAGACGTGTGAAGAAGCCAGAGCCAACGAGACTGCATATGCGTGTGTCAGCGACCATAGCGACTGTGTCTATAGTGATGCCGCCGGCTACCGCTGTAGGTGCTCCAAAGGATTCGAAGGCAACCCATACATCGTAGATGGATGCAC…
Seq_238234	Sobic.008G165800	Serk3B	Nicotiana benthamiana SERK3B (Serk3B) mRNA, complete cds.	Nicotiana benthamiana	GTATTTATGGCACAGCCACGCTGGTCTTCTCCTTCTGCCATTGCAAGTCTTGCAGAAACATTACTTTCAAAAAAAAAAAGTCTTGCAGAAACATATCTCTTCTCTATCTTCTCTTACTACCTTCCAAGAATTCCTTGCTTGGCGCTCGATGTTCTTGGCTCCTTTATGCAGACTTCATCCTGTCACACTGAAGTCTTCCACTGATCAATTAATCTCCAGGTAGCTACCAGCACCTCTTTTGCATATCTGAAGATCTGAATTCCAAAGAAGAGAGCTCGAAACAACAGTCATGGGTTGCTTCCCTGTGTTCTGGAGGAAGAAGAATTCCAGAAGCCAGATTGTGCAACATGACCAAGACATCCCCCCAATCACGGGCAATGTGAAAATCTACTCGTCCAA…
Seq_238425	Sobic.009G126600	PEPR1	Arabidopsis thaliana PEPR1 (PEP1 RECEPTOR 1); ATP binding / kinase/ protein binding / protein serine/threonine kinase (PEPR1) mRNA, complete cds.	Arabidopsis thaliana	GGAAATCAAAACCACTTTTTTCCTTTTTCTTCATGCATTGTTTAATCATCTCACAAGAAATGTCAGATAATATAAGTTGCTCTTAGTTACAATAAAAAATCACTGTACCTAAGGTGTCTGACTGAAAAATGCTCAAAGCTCAGTGTCCATACAAGAATTGAACGGAAATTGACACCACGGAGAAGAGAGGACCAGTAGATCAGATGCTTCAGCACAATCTTGGCAAACACGTACAAACACACATTCTAACTGGAGCAAGCTTTTCTATCCCCTAATTCCCCATAACACTCTCCACTCATGCATTCCATAGAGCATACTGTTTTGAGAGCCTTCCTTACGGAATTTGTTAGCTGTAATGCCCCTATGGGACTCAGGATAAATTAGAATAATCTCTCTTTA…
Seq_238426	Sobic.006G114200	Pikp-2	Oryza sativa Japonica Group resistance protein Pikp-1 (Pikp-1) and resistance protein Pikp-2 (Pikp-2) genes, complete cds.	Oryza sativa Japonica Group	TGAATGTTCTTCACTCTGCTGTCTGCTCTGCTCCATCGGCCATCGCGTCTTATAAGAGCTCTAGCCATGGCTACCTCCCTCACAAGTCGATCGGTTCTTCCGCGCGCTCTCGGCCAGCTGCTCACGTCCACCTGCAAGCAACAGCGATCAGGGTAGCCACCCAGTCGTCAGCTAGTCCTGCCGGTCGCAGGCTCGCAGCTGTTCGTTTGCCCTGTCCCTCTTCGCCTCTGCTCTGCAGCAGCGCGTATACCTGTCTGTCGGCATTCAGCAGCACGACATGAAGCAAAAGATCGTGATCAAGGTCAGCATGTCGTCCGAGAAGAGCCGGTCCAAGGCCATGGCGCTGGTCGCCAGAGCGGACGGGGTCAGCTCGATGGGGATCACCGGCGACGGCAAGGA…
Seq_238441	Sobic.002G366100	Hm4	Zea mays NADPH HC toxin reductase-like protein (Hm2) mRNA, complete cds.	Zea mays	GAAGATTCGAGTGAGCCGAGCGCAAATAATGCTCGAGTGCTACGTAAACGGGGCCGAGCGTGCAAAGCACAGGGCACGCAGTACAGCTCCGCTCAGCACAGTGCGAGAGACGCAGACGTGGTTTATTTCAGAACAAGCAAGGGAAGGGAAGAGCTAGGAGGATGGGCGGCAGCACGGCGGACACGGTGGTGTGCGTCACCGGCGGCAGCGGCTACCTCGGGAGCTGGCTCGTCAGGAAGCTCCTCGACAGAGGCTGCGTCGTCCATGCCACCCTGCGGAGCCTCGCGGACGAGAAGAAGACGGGGCTGCTCCGGGCGCTCCCCGGCGCGGCGGAGCGGCTGCGGCTGTTCGAGGCGGACATGTACGACGCCGACACCTTTGAGCCCGCCATCGCCGGCT…
Seq_238564	Sobic.008G142500	FLS2	Arabidopsis thaliana FLS2 (FLAGELLIN-SENSITIVE 2); ATP binding / kinase/ protein binding / protein serine/threonine kinase/ transmembrane receptor > (FLS2) mRNA, complete cds.	Arabidopsis thaliana	TTTTTTTTTGACGGAAACTGTTGCCATTTAATATCGGTTTTAGAATATATCACGTTTCGGTATGCGTTTTCCACCAAACAGAGGGAGACCTGCTCCTCATTTTACAATATATATATGACAACTAGCCACACACATATATTGACGCGCCACTAGAGCATTGCTGGACAAGCTGCAAAAACAAACACATACAGTTATTTGATGAACTCCACAGAGGCAAGCAATCCATAATCCTGCATCCATGTCCAGGCTTCAGCATCTTCTCGAATTGATGTGTTCAGTACTAATCTTTGCTGAGCTGATAAGTGGGAACAACGATGACATGGAGGTCCTCATCGAGCTCAAGGGCTTCCTACAAGCACATAACCAAATAAACCGAGGTGCGTATGATGGATGGTTGGA…
Seq_238680	Sobic.009G142500	Serk3A	Nicotiana benthamiana SERK3A (Serk3A) mRNA, complete cds.	Nicotiana benthamiana	CCTGCACCGGCGCGAAAGCCCCCTCCACGGCCTCACCTCCACTCCGTCGATGGCCGCCTCTCCTTTACTCCTCAGTGCTCACGCGGTCTTCCGCATAAAGATCCACACCACTTGAGCAGCTAGCTCAAGGAAAGGAGGAGAAGGTTGGAAGTGGAAGGGAGCGGATGCTTGGTAGGTTCTTGCTTGAGCTGAGCTCTTGCTGCCCGTGGATCTCTTTGGGAGTGGTGAACGGAGGATGGGGCGCGGCAAGATCGAGATCAAGAGGATCGAGAACTCCACCAACCGGCAAGTGACCTTCTCCAAGCGCCGGGCCGGACTGGTCAAGAAGGCCCGGGAGATCGGCGTGCTCTGCGACGCCGAGGTCGGCGTCGTCATCTTCTCCAGCGGCGGCAAGCTCCA…
Seq_238770	Sobic.001G305700	Lr34	Triticum aestivum chromosome 4 clone BAC ABCT5; BAC ABCT33 map 4A, *** SEQUENCING IN PROGRESS ***, 7 ordered pieces.	Triticum aestivum	CAAAACCTCCCACCAACAGCGGCTGCAGCGCTAATTCCCACACCTTCCCAGGCCACGGCGCGCCTCCCATGGCCACGGCGCCCCTCGCCTCCCGCCTCCCCTTCCCATTCCCCTCCGCCTCCCGACCTCCACCTTCCAGAATCCTAGCCCCTCCCAACCCCCGCCGCCTCCCCCTACGCCTCGCCGCCGCTGCCGCACGACGGTTCCGCCCGCCCACCGCCGACGACGAACCTCCTGAGGCCGCGGAGGACTCTTCCCATGGCCTCACCCGCTACGACCAGCTTGCGCGCAGCGTGGAGCGCGCCAGGAGCCGCCAGCCGGAGATCACCCCCGACAACCCGCTCTTCTCGTCCCCCTCCTCGGCCGGAGGCGGCGGCGGAGGCAGCTACGACCCTGACG…
Seq_238828	Sobic.001G503300	RFO1	Arabidopsis thaliana RFO1 (RESISTANCE TO FUSARIUM OXYSPORUM 1); kinase (RFO1) mRNA, complete cds.	Arabidopsis thaliana	GGCTGAGCGAGTCCCGAGTCCCGACCCGAAGCAGTCGTCCAACTTGACGCACCGAACGCAGAGCGCGAAACCCCACGGCTCCGACCCTTCTCGCTCCCCGCTCTTTCCTTCTCCTCCCCGTGTCATCGTCAAACCGCTGCTTTCCAATTCCAATTCCAAGCCATCAAGGCAGCAGCAGCCCCCCTTGCGTCTCCGCACGCCACCGCAAGAGCCTCGCCGCGCCTGCAGGACTGCAGGCCATGATGAGGAGCGTCAGCGGCACCGGCTCGGCCGGGAGCCGGAGGACCGACCCCGGCGGCAGCGGCGAGCTGTCCCGCTTCTCCGTCGCCACCACAGCGTCATCCGCGAGCGGTGGCGGGCGCGGGATCTCTTTCCTTGACGCCTTCCGGGCCTGCTTCG…
Seq_238964	Sobic.009G117400	Serk3A	Nicotiana benthamiana SERK3A (Serk3A) mRNA, complete cds.	Nicotiana benthamiana	TACATAGCATCTTGTCTTTCCTGAAGAATCAAACAGATGGCCAGATGTATATAAGTCAATGCAGCATATGTCAAAACAATAATAAATCTACCACCCAAAGAGACATTTTCTCAATCCAAAAGTGGAGCAATAAGTGAACTAGGATCCTCTTAACACTGACTTAAAATAAAGGTGCCATATAAGCTGTCTGAGTTTCCTTTGCAGGTTGCATGTAAAGGGTGATGGTGATTGTATTGTACATTTGTACTACCCTTTTCTAATCTAAACTTTATAGTACAGTAATACTAACTCCATCATTCCCAAAAGGTCCACATTTTAGCCTCATGTAAAGACTAATAAATGCTGTAAGACTGCCACTTCCATTATAGAATACTCCCTCCTTACCAGAAAGAGTGTCAT…
Seq_239045	Sobic.002G283300	FLS2	Arabidopsis thaliana FLS2 (FLAGELLIN-SENSITIVE 2); ATP binding / kinase/ protein binding / protein serine/threonine kinase/ transmembrane receptor > (FLS2) mRNA, complete cds.	Arabidopsis thaliana	CCAGATTTGGCTCTGGTTTAGTTCAATTTAGCTTCTTCCATCGTTATTATGTCAGAGATCCAACCACACGATCAGACATAATCCTTCCAATCTAAAGCCACATCGTCACATGGCTTTCCGACGCAGAACACCGCCGCCGCCCGGGGCCAGCGCCACTGCGCCAGCCAAAGTTTTCACCAGCCGAGGTAAACTGAAAGGGGTGAGGGTGGCGCTGGCGCGGCCGCACGCGGCCACGCGGCCATATATAACCAGCGTCCGGCTGCCGGCAGTAGCCGCAAAACGAAATCTCTCTTCCTCCGCGGCTCCTCCGCCCCCGCTGCCGTTTCATTTCACTTTCCAATTTCCTTTCTCCTCCTCAAAAAATCGGCCACGGTTATTTATCTCCCTCGCTCCGCTCCG…
Seq_239221	Sobic.003G325100	RPG1	Solanum bulbocastanum putative disease resistant protein RGA2 gene, complete cds.	Solanum bulbocastanum	GAGCTGCTACGCCAAGTCGCTATTCTCGGCGCTTGTCCGAAGAAACGGCTGAATAATCGTCTCCTCTCTAGTCTCTCTACAAGCCACACTCCTGAAGCTGAAGAGAAAGGCCGACGTCGTCGATGGCCGTGGAGGTCGTCCAGTTTCTTGTCAAGAAGTTCGTGGATAGCTTCACCGAGGAGGCAGTGGACGCAGAGGCGGAGCTCCCTTTCCGCACCCAATTCCACGACATGAGGGCCGAGCTGGAGAAGGCGGCCGTTTCTCCCGCCAACGCCGATGAGCTCCGGGAGTGCCTCTACGAACTCAACGACTTGCTCGCCGAGTGCCGCAGGCTCGCCAACCGACCTAACCATCAGCGGTGGTGCTTTGCCCAGTCCGACGCTTGGCGCTTCCCCAAGA…
Seq_239224	Sobic.006G201700	RFO1	Arabidopsis thaliana RFO1 (RESISTANCE TO FUSARIUM OXYSPORUM 1); kinase (RFO1) mRNA, complete cds.	Arabidopsis thaliana	GGATGCCAAGATATCGACGAATGCCGGAATTCCAATAGTAACAACTGCACCTATCAGAACCTCTGCAACAATACTTTGGGAAGCTATACTTGTTCTTGCCCCGAGAACTACATTGGTGACGGTTACAGGACAGGAACAGGCTGCACCACCACTCTTGTGACACCTGATTCTCCTACGCAACAACCGCAAGGTATCAGCATATGTGATCACCCAGAAAAAAACCCTTGTACTAAGTACTGCATTGATTTGGAAGGAGTTGTTTCGTGTGCCTGCCCTAAAGGGATGAGTGGTGATGGCCGGAAAAAGGGCAGTGGCTGCTATGGCTCTCAAAAGCACTTTCCTCTAGACACAGTTTTGGGTGTAGGTCTTGCACTTATGGTCACAGTGACTACCGCTGCA…
Seq_239325	Sobic.005G075800	Pi5-1	Oryza sativa Japonica Group Pi5-1 (Pi5-1) gene, complete cds.	Oryza sativa Japonica Group	GTGCTTTACATTTTGCTCTATATTCCCCAAAGGTTGTAAAATCAACAAAGACTACTTGATTGAGCAATGGATGGCCCATGGATTTATCAAGTTGAAGAAGGAAGAGCTAGCACATGATATTGGAAATGAATACTTTGATTCCCTTATGAGAGCTGGTTTTCTTCAGGATCCAGTTAAAATGCCACAAACTGTAGAATGCAAGATGCACGACCTAATTCATGATCTCACTCTATATATTTTACGAAATGAAGTGGTGACATCTCTACCGAATAATATGACTACAGAGTGTTCAAAGAATTGCAGGTATTTATCTTTGACATCTTGCAGTGGGAAGGTTGAAAGGAGTCTATTTTACAAGGTCCGTGCTGTATATGTCTCTGGAGGCAACCCATCATTTGA…
Seq_239326	Sobic.005G076100	RPG1	Arabidopsis thaliana RPM1 (RESISTANCE TO P. SYRINGAE PV MACULICOLA 1); protein binding (RPM1) mRNA, complete cds.	Arabidopsis thaliana	ATCAAGTTGAAGAAGGAAGAGCTAGCACATGATATTGGAAATGAATACTTTGATGCTCTTATGAAAGCTGGATTTCTTCAAAGCCCGGTTCAAACTTGGCCTGAAAAAAGTGTAGTATGCGAGATGCATGACCTGATTCATGACCTTACTCGTTATATTTTACAGTATGAAGTGATGGCATCTCTACCAATGAACATCACTACACATAACTGGTCACAAAAATGCAGATATTTGTCTTTGATGTCTTGTAGTGAGAAGGTTGAGGGGGGCCTATTTGACAAAGTCCGTGCTGTATATGTCTCTGGAGGTAACCCATCATTTGATAACCATGAGATTTGCTATATCCGCAGTGTTGTTCTAGACTATGCAGTTGATACTCTATTTCCACAATTCATACTG…
Seq_239456	Sobic.009G200800	Xa26	Oryza sativa (japonica cultivar-group) bacterial blight resistance protein XA26 (Xa26) gene, complete cds.	Oryza sativa Japonica Group	GGTTTTTAGTCTCAGTTATCTTCTACCACCAACATGCTAAGATTTCTATCATATCGCTCTCAAGTTTCATCAAGATAGAATTTGTTAAGGTAGCCAAACAAGTATTTACTGTGCTCCCCCAAAAAAATTGATGTATGTACTGTGTCCGAGTATATACCATGAAGAGATCTCTGGTCTCTCAACAAAAAAACAAGAAAGATTCAATTTACACAGTTGCTACCTACCAGATAACAAGCTACTAAGAACAAGAAGACGCGTAACTACAGTAACTTTGGGGGTGGAGGTCCGGAAAAATCAGGTTGAGCGTATGACAGCCTCTGGATCCAGTTGCCAGACTTCTTCTTGTTTTGATCATTGCATTCCAGGGGCTGGCAGATCGAGATTGGGATCTTGTCGAGT…
Seq_239571	Sobic.003G409300	RCY1	Arabidopsis thaliana RCY1 gene for R-protein, complete cds.	Arabidopsis thaliana	GCAGCAGCAGCAGCAGCAACAGCTGGCCCCGGATCATGTCGCGGGCCTTCGACGACCTGCCGCACCACCTCAAGTCGTGCTTCCTCTACCTGGCGGCGATGCGGGAGAGCACCCATGTGGACGCGCAGCGCCTGGTGCGCCTGTGGGTGGCCGAGGGGTTCGTGCGCCCGCGCCGCGGGAGCACCATGGAGGAGGTCGGGCAGGGGTACCTCAAGGAGCTCATCTCCCGGTGCATGGTGCAGCTGGTGGACAAGGACGACTTCGGCGCCGTGCAGACGGTGGTGGTGCACGACCGCCTGCACGCCTTCGCGCAGGACGAGGCGCAGGAGGCCAGCTTCATCGAGAGCCACGACAGCACCGACGTGCTCGCGCCGGCCACCGTGCGCCGCCTCGCCGTCC…
Seq_239655	Sobic.010G274900	Serk3A	Nicotiana benthamiana SERK3A (Serk3A) mRNA, complete cds.	Nicotiana benthamiana	AGAACCAAAAACCAAAATCGCGCCAGAGGACAATATAGCGAGTAGCGCAAGTCGGCAGTCGCCTCCATCTCCATCCTCCTCCTCCTCCCCTGCGTCGCAGACTCGCAGTTGGTTCCTCCCTCCCCTTCCTCTTCCTCTTCCCTTCCTTCCCGTGGCTCTACTCCAGTGCAGTTGCGGTTGCAACTCGAATCTCCCTCTCCCTCCAGCAACCGCTAGAGCCTCCTCACCCTCTTCTCCAACCGCTGCCGCCTGCCCCCGCGCGCCGGCCGCCTGTCATGGGGAACTGCGCCAGCGCCATCGACGCCTTTGTCCAGCGCGGCAACAGGGCGTCGCCGGCCGCTACTCCTGGAATGTCTGCATCGAGGAGGACTAGTAGCTCTGCCACCACCGGGAAGCTGT…
Seq_239906	Sobic.004G173500	RFO1	Arabidopsis thaliana RFO1 (RESISTANCE TO FUSARIUM OXYSPORUM 1); kinase (RFO1) mRNA, complete cds.	Arabidopsis thaliana	AAATTATATTTCGCCTCCTAGCTTAATCACTCAACGGTTAATTGCAATTACAAAGGCATTGAAGAAGCCAGTTAGTATATTCCATAGAAATTATATTTCGCCTTCTAGCTTAATCACTCAACGGTTCATTGCAATTACACAGGCATTGAGGAAGCCAGTTTGATAATTTACAGAGTATAACACAATATGCGAAAAAAGGTGGATCCAGACAGAAGGAAACTACAAGTAAGCACCGAGGGTGCAGCATCTCAGCACCACAAACTACAACAAATCCAAACAGTATCTCATCAGTTGAGAACTTGGCCTTGCCAGGAGCTTCACTTTATCAGGTGTTGAAAATCCCCGCTGGCATGTACTTGCTTCACCTGTTTGTCATACTCGTCCTCGCAATCGTATTCC…
Seq_239908	Sobic.008G146900	Pi5-2	Oryza sativa Japonica Group Pi5-2 (Pi5-2) gene, complete cds.	Oryza sativa Japonica Group	CACCGCTTGGCAAGGCCGCCTTCGCCGCTGTGCCGATGGAGGTGCCGCCGCACAAGGGCATGGCTATGTCGGTGCCCGTGCCGTTGAAGGCGGCGCCCGCCAAGGCCGGGGTGATGGCCATGGACATGGACCTCACCGAGGGACACGAGGACGAGGGGATGGTTGGCGGCGGCGTCAAGGTGGCCAAGGAAAAGGTAAAGGAGATGGTTATGAGCGGCGGCGGCGGCTGGGAGGTGGTCGGTATCTCCGGCATGGGCGGCAGCGGCAAGACCACGCTCGCCATGGAGATCTTCAGGGATCACAAGGTCCGAGCCTACTTCAATGATAGGATCTTCTTTGAGACGATCTCACAATCCGCAAATTTGGAGACCATCAAGATGAAGCTGTGGGAGCAGATCA…
Seq_240069	Sobic.009G127000	ER - Erecta	Arabidopsis thaliana ER (ERECTA) (ER) mRNA, complete cds.	Arabidopsis thaliana	CGCAGATAGAGCTCTCCGCTGCCGTTGCGCAACCAACAAAGCTCATGTCATAATCACCGAGCAATCGGCTGATGATACGAAACAAGAAATCGCTAATTATCCCGAGGCGCCCATCGGTTTTAAAATATCCTAGTTGCGTCCGTCGCCATCCTCTCTTGCTCGGTCGCCTCGCCCGGTCCTGGTGTGGATAAATCGTCTTCCTGGCTGTTCTGGATTCTTCTTCTCGCTTGTTTTCCCTCTTGTTGCTTGCTCTCGTTCTCTTTCCCAGACCGAGGAAGACGAATCAGATTTGGTGATCGTGTAGAGCGTACAGGTGGTTGTTCTTGGAGAAGCATAGGCTGCGTCTCTCTTGGCTGTTCTTGTCTTCTTGAGCAAGGAGGCGAAGGAAAGACATGGAAG…
Seq_240297	Sobic.002G289400	Pid2	Oryza sativa Indica Group cultivar Digu B-lectin receptor kinase (Pid2) gene, complete cds.	Oryza sativa Indica Group	ATAGAGTCTTGCATTGTGAGTGCCCTAACATATGTTCATGCAGTGTGAGGTCTCAAATGTCAAAAAATCAAAAATCATTGATTCATTGCACAGGGACAAACGCCCAGAAACACGCATCTGAAGAAGAAAAAAGGTCAGTGTTGCTCCGTTGACTACCGTCCCTGAAGGACAGTCATGGTCATGGAGTTCCTGGAGGTCTGCACATCGTCTCCTTCTACTGCCGTATCACAATTCCGCTCTGCGAAGTATGCCGGCTGTTCCGGTGCCGGCAGAGACACGCTCCCGTTCTCCAGGATGGACACCACGGACGACATGAGCGGCCTGCCGTTCGGGTCGTCCTGGACGCACAGGAGCCCTACGTGGACGCAGAGCAAGGCTTCGTCCAGCGCACAGCTCTCC…
Seq_240402	Sobic.005G046500	RPG1	Hordeum vulgare subsp. vulgare RPG1 (Rpg1) gene, Rpg1-Swiss Hv 489 allele, complete cds.	Hordeum vulgare	GTGGCGGCGGAGGAGGGTGGGCCCGTCGAGGAGGGCGTCGGGGAGAGCTCGTCCCCGCCGCGCGAGGACGCTGCCGCCCCAGCGCCCGCCGGCTCCGGAGGCGGGAGCGGGGGCGGGAGCGGCGGAGGCGCCCGCGACATCTGCGCCCAGGTGCTCGAGCGCCTCGTCGCCGACGGCCACGCGGAGGCGTCCGACCCCGACTTCCGCGACAGGCTCGCCGCCCATTTCGGGCGGCTCCCGCACAGCTATCAGCTGGATATCAATGTTGACAAAGCAGCCGATGTCTTGGTCCACCAGAACGTCTTGGCGGAAGCAAAGGATCCTGATAGGCGCCCAGCGTTCGCTGTCCGTTTCCTCAGGCTTGAAGAGGTAAATGTGGACGAGACAACTAACTCTGAT…
Seq_240592	Sobic.002G188000	Serk3A	Nicotiana benthamiana SERK3A (Serk3A) mRNA, complete cds.	Nicotiana benthamiana	GCCGAACGCGTGCCATTGCTCCTGAGCACCTCCTCCGACGCTGGTTATGTATCAGCTCTTGGCACTTGTTGGTTGTTGCTGCTCCGTCCTGAGGCTGAGCCGTGTTTATGGCGAAGGCTCTCACTGCACTTGCAGCAGCACTCGTAGTGCTGCTTGCATGTTGCCCTTGTCGGGTGCGAGGTGACGAATCGCCTGATGTCACCGCGTCGCTCGTCAGCTTCTTGACCGTGCTCGCCGGGGACGACGGCGGCCAGACGGCGATCAGGCTGGGGTGGAACGCGTCGATCAACCCGTGTGTTCCCGGCAACAAAATCTCGCTGTGGGGCAAAACCGTCCAGTGCTTCGACCAAGGTGGAAACAATGGCCACATCAAGAGGATAGACCTTGATGTACAGGGCC…
Seq_240673	Sobic.004G195500	Pikp-2	Oryza sativa Japonica Group resistance protein Pikp-1 (Pikp-1) and resistance protein Pikp-2 (Pikp-2) genes, complete cds.	Oryza sativa Japonica Group	GTAGAATTTGTCTCGATTTCGTTGCCTTTTCTCCGGGGAAAAGTGTGATCGTAACGTAAATTTGGCCGCAATACAAAAAAGGACCAGAATACATGATAGAATTGGGCCCATAAGCTGGTGGCTACAAACAAAACTAAAGCCCATACTGATACAATGACTGTGCTCGAAAGACTACCTATTACCGATCACGGATCAACAAACACGGCCGCCCAAAGTCAACTCAATGCTTCCATGGAACCCGGCTCCTACATTATGGAGCAGATGCTGTCAGTCCGCGTATGGTACCTGTACGCGTACCCGGCCGCGGGATTCTCGAACACCACGGCCGCCGGCTGCGGGTACTGTTGGTAGTACCACGGGCTCGACGCGACGAACTGGGGCAGCGCGGTGGCGGTGGCA…
Seq_240741	Sobic.002G008200	Bs3-E	Capsicum annuum cultivar ECW Bs3-E (Bs3-E) gene, complete cds.	Capsicum annuum	GTTGGAGCAGAGACGCCATCCGGAACACCGTGCCCAAGACCTGAGGAGCAGTAGTGTGTCTGCAGGTCCACCGGAGGCGAGGCGAGATGGTGTCATCCAAGAAGGTGTGCGTGGTCGGCGCCGGCGTGTCGGGGTTGGCGTCTGCCCGCGAGCTCCTCCGCGAGGGCCACGACGTGACGGTCATGGAGCAGAGCTGCGGCGTCGGCGGGCAGTGGCTGTACGACCCGAGGACCGACGGCGGCGACCCCCTCGGCATGGCCGGCGTGCACAGCGGCGTGTACGCCTCTCTCCGCCTCAACGTGCCCAGGGATAGCATGGGCTTCTCCGACTTCCCGTTCTACCCCAAGAACGACGGCACCGGCGACGCCCGACGGTACCCGGGGCACGCCGAGTTCCTGA…
Seq_241211	Sobic.008G020900	RPG1	Arabidopsis thaliana RPM1 (RESISTANCE TO P. SYRINGAE PV MACULICOLA 1); protein binding (RPM1) mRNA, complete cds.	Arabidopsis thaliana	TGGCTAAATCAGGCAAACACATTCTCATTACTTTCCTACTAATAAGTGAATTCAATGACAATATGAAAATGATGTGGTGGGTTCGACGTATAATTCAGGAAAACCCACTGTCTGTATCCTATCGGATACAAACTATGGGACAAAAAACCTGAATCGCCTTACTGCCCTAATACAGTTCCAAACAAGTATTCACTCTCAGGAGTTCAAATACAATATAGTGAGAAGTACTAATTTCAAGATGCATCGCGCCTTCTTGAAGAACATAACGGCATAATAAAGACATGCAGACTGATAATTAAACATCTGATAGCTGACACAGTCCCACAGAGATAGGTAAGCCATGTACTGATCTGCACCTAATTGAATTGCCAGCAAATCCCACAAATACAGAGGAACTTC…
Seq_241367	Sobic.008G186300	FLS2	Arabidopsis thaliana FLS2 (FLAGELLIN-SENSITIVE 2); ATP binding / kinase/ protein binding / protein serine/threonine kinase/ transmembrane receptor > (FLS2) mRNA, complete cds.	Arabidopsis thaliana	CCTTCCAAAACATGTGCACTTTGTATTACTCCTACATGTGGCACCAGATTAAGCAAAGCACATGTCGATTACATTTTGTAGAGTATCATATACTTCCTTTTCAGCAGTGGCTTTTCTCTCCCCACTAACTAACCCCATATAATCCAAACCCTTGCTGCCTACTTACTCCTAATCCGGTCCAGAACATCTATCATCAACACTTTGCCTAGTAGCTGCATCTGCAGACTGAGGGCCCCTAGTGAGTCGAGTACTGCCACCTTAAAACCAGTCAAACATCCACACACTGACACCGAGGAACCAACGAACCACGCGTCATCCTTCGCTCCCCGACGCCCGGCGCCATGCCGCCCGCCTGCCCCCTCCTCCTCTCCCTCTTCCTCGCCGCCGCCATCATCACCT…
Seq_241418	Sobic.005G061000	Lr34	Triticum aestivum chromosome 4 clone BAC ABCT5; BAC ABCT33 map 4A, *** SEQUENCING IN PROGRESS ***, 7 ordered pieces.	Triticum aestivum	TCAGCAGCAGCGCATGCCACCTCATCACTCTCCTCTCTGCTACCTTAGCTACCACGGCCTCCTCCTCACGGTAGCTCCCTCTCCCTCAGCAGCAGCGCATGCCACCTCGATCCCCAGCCAGTCCCCATCCCGTGCTCTAGCTACCTGCTGCCGTGTCTTGTGCTTCGTTCGAGCCTAGCTGCCACGCAATGCCTCCTAACGCCCACCAGGACGTGCGCGGAAGCAGCGCCGGCGGCCTCGCCATGACCATGACGTCCCCTCCTCCGGCCACGGCCACGGCGGCGGCGGCGTCCAAGATGGACTGCTTCTTGACCACCGTCTGCACGCCGCTCCACATCCAGTTCGTCGACGTGTCGTACCGCGTCAAGCAGACGGAGCGGTCAGCGTCGTCATCCTCCA…
Seq_241860	Sobic.007G009500	RFO1	Arabidopsis thaliana RFO1 (RESISTANCE TO FUSARIUM OXYSPORUM 1); kinase (RFO1) mRNA, complete cds.	Arabidopsis thaliana	GGCAGGTACTCCACGCCGCGCGCCGCGTCCAGCGCCACCCGGAGCCGCGCCTCCCACGACGCGAACAGCGGCGAGTACCCGCTGCTGCTGCTGCCGCCGCCGTGGAGGTGGTCGTGGAGCGCGCCGTGGGGCATGAACTCGAACACCAGGATGCGCTCGCCGCGCTCCTCGCAGAAGCCCAGCAGCTGCACCAGGTTGCGGTGGTTCACGCGCGACAGCAGCCGCAGCTCCGCGCGGAACGCGCGCTCCGTGTCGAAGCGACGTCGCCGCCGACCGCCGCTGCCGCTGCGCTCCGCACGCTTGATGGCCACCTCGCGCCCGTCGGGGAGCTTGGCGCGGTACACCGACCCGAAGCTGCCGCTCCCGATCTTCTTCTCCACCGAGAAGCCGTCGGTGATG…
Seq_242125	Sobic.009G140000	Mlo	H.vulgare mRNA for Mlo protein.	Hordeum vulgare	GCCGCGAGCGGTGAAGCGATTGCCGAAAAAAAAAGGCAAAAACAAACACGGTGGTCGGTGGAGCGCCGCGGCTGTTCTCAGTTCTCACTCTTAGCCTGGACTGGAGCAGTTCCTCAGTTCTCAGCTTCCAGTACTAACAGGAAAGTAGAAATTCCTAGCGCGTAGCGCCGCTCCTTCCATTTCCGCCTCCGCGGCGACCAGCCCCGCCGCGCCCGAGCGTTTCCTTCCGGGAGCGGCGAGACGGTTCACGTGGGAGACGCGACGCGAGCCCTTTATTTCGACGCTTTCTGCGTGGGGGGAAGGGAGGCCGGAGCCGAGCGGGGCTGACGGGCGATGGCGGCCGAGGGCGAGGCGGCGGCGCTGGAGTTCACACCGACGTGGATCGTCGCGGCGGTCTGC…
Seq_242132	Sobic.005G212600	Pit	Oryza sativa Japonica Group Pit mRNA for NBS-LRR disease resistance protein, complete cds.	Oryza sativa Japonica Group	TGATTCTTCAGTAGATGTTCTGTATCCGGATACTCTGTTTCTACGTCCTCTCGGTTTGGTATGTTATGTAAAAAACGCATCATTATGTGCTTGATTACATGTCTTGACAGTGCACCAGTTCCTTCACATTTATGTTGGACAACCAAGTGACGAGATCCTGTTTGGGGTGAGGCTATTGGCCATCATACATACTGACATCCATCTGTATCGACCGTAGGTTGTATCCTTCAACTCTGCTCTTCACGGCTTCTGAGATAACGGAAGTTTCATGTTTGAGAGCAACATTTCTAATTGATGACCTCGTGTTGGAGGAAAAAGGAAAACAATAAAATCTTTGACACATATTGATCTCGGTGCAGAATAGTGATCAGTCCCATACAGCTGTCCTGTCCTCAGTAT…
Seq_242274	Sobic.002G398100	Mla6	Hordeum vulgare Mla6 gene, exons 1-5.	Hordeum vulgare subsp. vulgare	TTTTTATTAAGAAGAAAATCGAATGATTATAAGACACTCAAGTACAATTTGTGGTTGCATGTCTTTCCTTCTTGTACGACATTCTACCTACTAATAACCTCAGTAAATACAGCATGTAGTGCAAGTGTCGAGCTTTCCGGTTTGTAAATAAGCACAAACTGCAGAAGCAAACATAAGTATAGTACAGTACACCGTTAGATAAGCCAGCCACAAGCCGTTACATACATTCTATGGATTCTTCTATGTGGCCCTGTTGTGCCTGCCAGGTGAAAACCGACTCCGTCTACTAAATCCGATGTCAACTGTGGCACAGTTGGGAAGCATATTTACTTGGCCATTGATGACAGATTTGACGGCCTTCTCCGCGGGATCATTTTCACCTTCAGAAATCATCCGGAT…
Seq_242280	Sobic.002G398200	Lr10	Triticum aestivum resistance protein LR10 gene, complete cds.	Triticum aestivum	TGCATCTATATTGTGCTTTAGAAAAAGTACTAAAAAAGACATACAAGTAATAGGACAATTTGTATGTGGAATCTAGGTGTGGAATTGTGGAAAATTAAGCAGAGTTTAAGCCGTCTCTACAATCCTGTCTTTCAGGTGAACAATCACATGTCGTTGCTTCAACTCAACCTTAAACTTTTTATCTTCTTCCCCCATAAAAAGACTCTGTACATAGGGATAGGGATCACTTGGTGCACCTTGACTTTTTGCATTTTGCCATTGATCCTGGGCAAGCTGATAAGCTCAGGGAAGCTCATTGATTGGAAGCCTATTGTTTTCTTTGTTGCAACACTTGTATTGACGAAGCAGTGTACCATCGGCTGGAATGTCGTCACCTCTACCATCCCCAGTGAGTGGAAG…
Seq_242303	Sobic.005G049600	RFO1	Arabidopsis thaliana RFO1 (RESISTANCE TO FUSARIUM OXYSPORUM 1); kinase (RFO1) mRNA, complete cds.	Arabidopsis thaliana	AAAATGTTCAGACAAGTAGCTTACGGAGAGAGCAGAGCTCCCAGTCCATCAACAGCTCAAGAAGACTAGTTAGTGTCAGTCATGACATCCCACTCATCAGCATTAGTAGCAGGACTAGTGTGTCTCAGTGCGGCGGTGGTCGTGGTGCGAATGCCATGGCTCGCCGCCGCCGCCGGGGAGAGTAGTATTGGTGGTGCGGACTGCGAAACATCATGCGGCGGCGTGGACATCCCTTTCCCGTTCGGCATGGGAAAGGATCACTGCATGCTGACGCCGGGCTTCCGTATCAATTGTGAAGACGTCGGGAACGGAGTCCGTAAGGCGCCGTTCTTGCCAAATTTCACCAAAGTGGAGGTCCTCAACATCTCTCTGGAGCAAGGTGAAGCCCAGGTGCTCAAC…
Seq_242500	Sobic.004G044401	ER - Erecta	Arabidopsis thaliana ER (ERECTA) (ER) mRNA, complete cds.	Arabidopsis thaliana	AACAGCACCTGCTCTGTTTGTTCCTCAACCCTCATGCCCATTCTCCATCAGACGCAAAAATGGACCTATGGCTTCTCAGCGCACAGCTTATGCCTCTTTCTCCTATGTTCATATCTTGGGGGCGAGAAAGCATGCTGCCGCTCCAATCCTCACCGAACAAATACAGCAGCAGATTTCCCACGATTTCCCTTGCCTTCGCTATTGTTCTGCTCCTCTTCTTGGCCTCTCCTGCAAGCTCTTGCACCGAGCAGGAGAGCAACTCCCTCCTCCAGTTCCTCGCGGGGCTCTCGCAGGACGGCAACCTCACCACGTCATGGAAGAATGGCACAGACTGCTGCAAGTGGGAAGGCATTGCCTGTAGTCCAGACAAGATGGTCACAGATGTTTTCTTGGCTTCTA…
Seq_242552	Sobic.006G148500	RFO1	Arabidopsis thaliana RFO1 (RESISTANCE TO FUSARIUM OXYSPORUM 1); kinase (RFO1) mRNA, complete cds.	Arabidopsis thaliana	AACTTCCTTCCTGCTCGACACGAACAGCGGTATCCTCCTACTGTGTTGTGGCAAATGCTGCCCGAAGGGCATGATGATATGTCTTTACATTCGTCGTAATCTTGGCATCCACCTGGAAGGTAAGGGTTGCCGTCATACCCTGCTGAGCACTTGCACACGTACCTGGCCCGTTGCGTGAATCCACGCACTCGCTGTTGCTGCTGAGGCACCCGTAAGTGCCCGTCTCGTTCCGTTTGGCGACCTCACATGTCGTACTGTTTCTGATCGCCCAGTCTAACACCACGGGTACCTGCCCAGTGCCCGTGTCGTTGAACTCTGTCGTGCTGATGTACGTGGTGCTGAAGTTGAACACCTCCGCCTCTAGCAGCGCGGCGTAGCTGCAACGACTGAAATTCCAAA…
Seq_242587	Sobic.001G520100	Mlo	H.vulgare mRNA for Mlo protein.	Hordeum vulgare	CGGCCCCCCCGCCCCTGGCGCGCGCGCCGATAAAACCGCCGGCAGCGTTTGCTCCGCCGCTCGCTCGTCGCTCCTCCTCCTCGCTCGCCCGCCACCGAGAGACGAGACGAGACGATACGTGCGTGCGTGCCTGGCGCGAGCGCACCAGGCACCTGCAGCAGCTCCTCCGCGGCCTGCGGGCCTGTCGCTTCGCTTCGCTTCGCTCCAGGTCTCCAGGAGAAGGCCGAAGGGACGGCATGGCGGGGGGCGCGGGCGGCCGGGACCTGCCGTCGACGCCGACGTGGGCGGTGGCGGTCGTGTGCGCCGTCATCGTGCTCGTCTCCGTCGCCATGGAGCACGGCCTCCACAAGCTCGGCCACTGGTTCCACACGAGGCAGAAGAAGGCCATGCGGGAGGCGC…
Seq_242596	Sobic.008G162201	Pid2	Oryza sativa Indica Group cultivar Digu B-lectin receptor kinase (Pid2) gene, complete cds.	Oryza sativa Indica Group	TGGCGGAGCTGGGTTGGTGGCTCAACGGGACGTGCGCGAACGCCACCAGCAGTGGCGCCCAGCGGTGCGCCAAGAACGCGACGTGCCATGACGTGGAGACGCCAAGAGGGACGTGGGGTCACCGATGCAGGTGCACGGACGGGATGGTCGGAGATGGGTTCGCCGCCGGCAACGGATGCTACCACGACGATCTCCTTGACTCCAACTCGAAGCACTGGAAGCTACCGGCAGTTGTCGCTGGCGTGTCTTTTTCCTTCGTGTTGTTCATCATCGGTCAGTCAGCATGGTGCCTCATCCGGCCGCAGAAATGGCGCCGGAGTGCAAAGATCATGACGGCGACGGAAGCATCCAAACATCAAACACCGAAAGATGCGAGACTTTTCCGCGGCAAACCTGTTC…
Seq_242603	Sobic.003G296700	Serk3A	Nicotiana benthamiana SERK3A (Serk3A) mRNA, complete cds.	Nicotiana benthamiana	GCCAGCACATAGATATCGCGTTCGCGCCCCGGTCTTCGCTTATTCGCTGGTGTTAGTTTGGTCGTAGTCCACCGGTAACGGGGCGGCGACAAACGTTGCACAAGCGCGCCGCACCACCGCAAGCGAGCGGGGCGGCGCCATGTCGTCTCCAGCGCCAACGTCGCCGGCTACGCCATCTCCTTCACCACCGGCTCCGGTGACGCCCACGCCATCGCCGCCGACTCCGGCGCCGGTCCCACCCACGCCATCGCCGCAGCCGCCGACTCCGGCGCCGGTGCCACCCACGCCATCGCCGATACCGCCGACTCCCGCGCCGGTGCCGCCCACGCCCACGCCGTCCCCTCCTCCTCCGTCTCCGTCGCCCCCACCGCCGGTGACGCCGTCCCCGCCTCCGCCAGC…
Seq_242797	Sobic.003G321300	RPG1	Arabidopsis thaliana RPS2 (RESISTANT TO P. SYRINGAE 2) (RPS2) mRNA, complete cds.	Arabidopsis thaliana	TTGTACTGGTATCCACCATCATACTGTTTTGGAGAACTCTATAGTTACATTTGCTAGTTTCCTGGCTGCCACACATGCTAATTGATCATTCTGTATCTGTAGAACACGGGCTGTGCAAAAAAAATAGAATCGCCCAACTTGTATTTACAAGATGGACAACACAGCCCAGAAATCCTGAACTACACAAACGACCAAATAAGAAAAGATTACACCCACGGCAGACTAGCAATATCTGAATTCACGTGATCTATTGTATCCACTGGGAAGAGCAATCCCTAAAATAACAGAATCTCTAGCAAGCAAAACTGAATTCAGTGCAATGGGCGGTACAGTGGATCATAAGAAGCTTTGACTTCCTCATCATCCCACTCCAGCACATCCCACCATTCCCTGGTGCAT…
Seq_242903	Sobic.002G333400	Pid2	Oryza sativa Indica Group cultivar Digu B-lectin receptor kinase (Pid2) gene, complete cds.	Oryza sativa Indica Group	CTTAGCACTAAGAATCAACCGCTCGTCCACGCGGCTCCCGCGGGCGCCCACCTACATGATATACGCAGGCAGCAGCAGCTAGACATCCATCTCCGCCATCTGATCCAGCAGCTCCTCCATCTCTTCTCACCTCTCTCTCTCTCATTTACCCCGAGCTAGCCAGCCAAGAAGGCTAGCTAGCTTAGCTACATCATCCGGCCGCCGACATTACATTGATGACGACGGCCCACGCCGCCGCGGCAGCGCTCGCCCTGCTCGTCTTCTTCAGCGCGCAAGCGCGGGACGCCGGCGTCCATGTCGTCGTCGACGCGGCGGCGGCGACGCTGTCGCAGGGGCAGTCGCTGGGCGCCGGCGACAAGCTGGTGTCGGCCGGCGGCACCTTCGAGCTGGCCTTCTTCA…
Seq_242908	Sobic.006G161000	PEPR1	Arabidopsis thaliana PEPR1 (PEP1 RECEPTOR 1); ATP binding / kinase/ protein binding / protein serine/threonine kinase (PEPR1) mRNA, complete cds.	Arabidopsis thaliana	GTGTGCTCTTCCGATCTCCCGAGGCCGCGAGTCCGCGACACTCGACCGTGAACCGGACGGCGTCCCGGCGGACTCCACCAGCGCGAGCACTGCCGCCCCCGAGCACCGAGGCCGATTTACGTTTGCGGAGCACTGGAAGCGCCGCCGGCCGCCGCCGCCCCGCCTGGCGGCCTGGCGCCAGTCGCCGTTGCCGAGCCTGTGCGCCGAGACGCTGAGCAGGCTGCGCGTCGCCGTAGCCGGCCGCCGGGTGCGCCAAGTTGCAGAGTAGCGCGCCAGTGCCCCTGGACCGGGTTTCTGGTGCCTACTCGTTCTGAATGGCGGACCTTACGGACATCGGTTGCTGCAGTTGCTTTAGCTTTTTAAGGAAGCCCAGTGTATCTGTACGTCAACATCAGGATG…
Seq_243013	Sobic.005G220800	Xa26	Oryza sativa (japonica cultivar-group) bacterial blight resistance protein XA26 (Xa26) gene, complete cds.	Oryza sativa Japonica Group	TGTCTAGAACTTTTATGGCGACCACCATGCCGGTGCTCAGTTGGCCTTTATAAACTTTTCCGAAGCTCCCAGTACCGAGAAGGTTGTTATCACTAAAATTATCAGTGGCAATAATGAGCTCATGGTTGGAGACTAATCTATGGCTTGTCACATTGCCTTGGTCACTGACCAAATCTTTAACATCTCCATTGTTCTTAAGTTTCCTTCTGGTCGTTATATAGACAGAAAGAACAATAGAAACGAATGCTACGATGGCAACTGGAAGCAAGAACTTTAGGAACTGTATATTTTGTGATTGAGATTTTTCATGGCATGGAGAAAATCCTAGACGTGGAGCCCCACATAGCCCTGCATTTCCAATCAAAGATTGTGATGACATGTTTGAAAACACACCTCCCT…
Seq_243035	Sobic.001G413900	Pto	Lycopersicon pimpinellifolium Rio Grande-PtoR protein kinase mRNA, complete cds.	Solanum pimpinellifolium	TTACGCCATTAGTATGTATAGAACCACTATGTAGGAAAAAAAGGATAGGAGAAGAAAAGCTTCGCCCCCCTCCCTATTGCTTCTGCGCTGCGCCACCAATCGCCATCGCCTCCTTTGCCCAGTCTCCGCGCCGCCGCCTCCTCCGCTCCCTTCCCTCTTCTAGGGTTTCTGTTCCATGCGATCTCGCGGCCTCGGTGGCCTGGGACAGTAGGGACGCCTCCTCACCGTTCGAATCTAGAGAGTCGGCGACCCAATGGGTAAGGGCGGGCAGGACGAAGGCAAGCGGCGGGACGGATCCACCGCCTCCGGGCCGGACCCCACCGCGCCGGTCTTCCCGGCGTGGGCGCGCACCCCGAGCGAGTGCCTCGCGGAGCTGGGCGTCTCGGCGGACCGCGGCCT…
Seq_243141	Sobic.003G116200	RPG1	Solanum bulbocastanum putative disease resistant protein RGA2 gene, complete cds.	Solanum bulbocastanum	GTCGTCGGCGTCTTCGACACGGTGGACTCGAGGACAGTAAGTGACCTGTGGGCTGTGGCATCGTAACCGAAAATTCACACACAATCCAGAACAAATAAAATTCCAGAGCTGGGTCCTTCCGCGTTCTCACGTTCATTGCTGTTCAGTCAATCACGGGGTTGAGGACTTGAGGAGCCTAGGCAGGAGGGCCATTGGCAATGGAGGTGCTGCTGTCTGCAGTCGCTAGCGACATCGTCGGCCGGCTGGTCTCCTTCCTCATCAGCAAGTTCCAGGAGGCTGGCTCCACCGATAACGACGTTGTCAGGCTGCAGCGTGCGCTGCTACGAGCCCGCGTCGTCGTCGAGGAGGCCGAGGCGCGGCAGGTCACCAACCGGGCGATGATGCTGCAGCTCAGCCAGC…
Seq_243503	Sobic.001G427800	Serk3A	Nicotiana benthamiana SERK3A (Serk3A) mRNA, complete cds.	Nicotiana benthamiana	CGAGGAGTCGCTTCGCGTCCCGCCGCCGCGCCGATCTCCCGCGATTTTGGCTCTTGCTCCACGGCGGCCTCGTCGAGGTCCTCCTACTCCACCGTCGCAACCATCCCCTTCAGCCGGAGACCGGCCCTCGCCCCGATGGATTCCGCCGCCACCGGTGCTCATGTGTCCGCCGCCACCAACCCTGGTCCGAACCCCACCACCGGCGCTAGTCCCAACGCCGCCACACCGGCCCCTCAAGCGCTGCAGAGGCCCCCTCCTCCACCCTGGCAGCAGGAGTTGCGGCGTCGGCGGCAAGGCCACCACGTGCTCCCAGATGCGGCGCAGAAGACCCGCAAGAGGAAGGCGTCCGCCTCCCCAGGAGCGAAGAATGCTCCACCACCACTATATAATCTGCCGGCG…
Seq_243641	Sobic.005G070200	RFO1	Arabidopsis thaliana RFO1 (RESISTANCE TO FUSARIUM OXYSPORUM 1); kinase (RFO1) mRNA, complete cds.	Arabidopsis thaliana	GGGGCTCAAACTCACCTGCGACACCAGCTACCACCCCCCGCGGCTGCTGCTCGGCGACGGCACCCGGGTCACCGCCATATTCCTCGGCAACAGCACGGTGCGCGTGGTCCGCACAGGCCCCATCATAAAAACAAGAGGCGACTTATTTACCTCTGATGGTTGGAACGCCTCGCTCGACTTCGGCCGCGGCTTCTGGGAGCAGGGCTACCTGCTGTCGGCCCAAAACGAGCTCGTCGTCCTTGGATGCAACGTGATGGCGACGCTTTCCGCGGACATCGTTGGGGAAGAAACCACCAAGATTGTCAGCGGCTGTGCCTCCTTCTGCACCAAGAGCGACAGCGACGATGACTTCATAGATAGGAGTAAAGTGCACAACAGGGGTATCGAAAGGTACTGCAG…
Seq_243774	Sobic.008G174200	Pikm2-TS	Oryza sativa Japonica Group Pikm2-TS mRNA for NBS-LRR class disease resistance protein, complete cds.	Oryza sativa Japonica Group	GAAAAGTGATACTAGGGACAAGCACAATGACGCACCAGCACAATCATGATTGAGAGTGCATCCACCCAAAAGTTTGGTGCTGGGGTAGCTGGAGCTTTGCTTCTTCCTTGCTGCCCTAACGCTAATCCGTGAAATTAGTAGAGAAAGTTAGGTGTTTCCGAGTGTGGATCGAGATCGAGAGTGCACAGCACAGTCATGGAGTCTGCGGCAGCGAGCGCTTTCTTGAAGAGCGTGATGGGAAGGCTCTTCGTGCTGCTGGAGAAGGAGTACAACAAGCACAGGGGACTTGCGCAAGAAGCCCAGTCCATCCAGCAGGATCTGCGCATGATCGGTGCCGCCATGGATGACCAAATCCGCGCCCTGGGGAGGCACCAGCGGCCTGCCATCGCGAGGCTGTAC…
Seq_243815	Sobic.002G262600	Pto	Lycopersicon pimpinellifolium Rio Grande-PtoR protein kinase mRNA, complete cds.	Solanum pimpinellifolium	CGATCTGGAACGGGAACGGAACGCCCCTCTCCTCCGGTCCTTCCCTCTGCTTCTGCTTCTCCCCACGCCACCGAAGCAATCCAGGCCAGGACAGGGTGCCACAAAACCAAAACCAAACCCCACCACACCACTCCGCACGACGAGATCATTTCGCCAGCTCATCGCCACCGCCCTCCTCCGCTCCGCTCGGCTTCCGCGTCTCCTTCTCCTCCTCCTCGTCGTCGGGTGGGTGGGTCCACCTCTCGCCGCGCCCCGCCGTCGACCCACCTCAGAGGCAAGATAAGTCAAAGGCGAGGTCGGTATGCGCCGGTGGTTTTGCTGCACGCAGTTTAATGCTTCATATCGTGAACATGAAAATGAACGTCCCATCAGTCCAGAGGAGAAAGAAGGAAATGGTTT…
Seq_243816	Sobic.002G262600	Pto	Lycopersicon pimpinellifolium Rio Grande-PtoR protein kinase mRNA, complete cds.	Solanum pimpinellifolium	CGATCTGGAACGGGAACGGAACGCCCCTCTCCTCCGGTCCTTCCCTCTGCTTCTGCTTCTCCCCACGCCACCGAAGCAATCCAGGCCAGGACAGGGTGCCACAAAACCAAAACCAAACCCCACCACACCACTCCGCACGACGAGATCATTTCGCCAGCTCATCGCCACCGCCCTCCTCCGCTCCGCTCGGCTTCCGCGTCTCCTTCTCCTCCTCCTCGTCGTCGGGTGGGTGGGTCCACCTCTCGCCGCGCCCCGCCGTCGACCCACCTCAGAGGCAAGATAAGTCAAAGGCGAGGTCGGTATGCGCCGGTGGTTTTGCTGCACGCAGTTTAATGCTTCATATCGTGAACATGAAAATGAACGTCCCATCAGTCCAGAGGAGAAAGAAGGAAATGGTTT…
Seq_243993	Sobic.009G126300	EFR	Arabidopsis thaliana EFR (EF-TU RECEPTOR); ATP binding / kinase/ protein serine/threonine kinase (EFR) mRNA, complete cds.	Arabidopsis thaliana	CACATCCGCCAATCAAGTAAACATACAAGACCTCTATCAATTAAATTAATGTTCAGGTCCGAACCTGTACACTGGTATATGATACACTGAAACCCAAAAGGTGTCAGGCGGCATAATTATACATGTAAACCAAAGAAGAAAAAAAAACCCTAGGTGGTGGTTATCAACTCTATTTCACTATCGCTGTCTTCTCATTCCCCGGTTATCAACATGAAATACACCCTGCCATGCCTATGCGATGATAGCTATGTGCAACTTGCAACCCCACTGCAGGTTGAGATTTTGCTAAATTTGAAATGCTGCAAAATGGATGGGTGCAAGAAATCAGGTGGGTCAAAAGAATACCACAAGCCTATGAACAAAAGGTCAAAAGCCATTAGAAGCCTCCGTCAATAAGTG…
Seq_244118	Sobic.002G363400	ER - Erecta	Arabidopsis thaliana ER (ERECTA) (ER) mRNA, complete cds.	Arabidopsis thaliana	GGAAAATCAACAAGTTCTTGTTTTGCATGAGACTGTACAGCGAACGTGTCTTCTTATCCTATGTACTACTTACAACCAAAATTGCATCTAACCCTGCTCTCCTACCTCTATTATCCACATCATGAATCAATGGCGAACTAATATAACAATGGCTAAAAACAACCAGATATACGTGAACAGACAAGCGAAAGGGGAAGAAAAATGTGATGACCTAAACTTGTCACGTGAATTCGAGTTGCGCGCAGCCGCTCGCGGCCACGTCGAGCAGCGCGGCGAGCACGTCCGGCATGTCGGGCCGCTCCTGCGGCGCGTCCGCCGTGCACCGCATCCCGAGCATCAGGAGCTCCCAGGACACGGTGCCGACGGCCGCAGCCTTCTCCGACGACGACCGCCACCCTT…
Seq_244405	Sobic.010G242400	Serk3A	Nicotiana benthamiana SERK3A (Serk3A) mRNA, complete cds.	Nicotiana benthamiana	CTTAGTCAAAGTCCATGTCCAGACTAACCTACTCACCTAGCCCATATAATTGGGCTCCTCAATGGCGGCGACCAGGTCCGGAGCAGAAGAGGCGGTGGTGAGCACGGCAGGAAGCGGCCATGGCAGGCCTCTTGGACAGCTCGAGCGGCCTGTGGACCGTGCTCGGGCAGGCCTCGAACGTGGCGCAGCTGGTCGGCGTCGACGCGCTCGGGCTGGTGTCCATGGTCGTGCAGGCCGCCCTGGCGGCGCGCCGCCACCGCGACGCGTGCCGGCGCCTGGCGCAGCACGTGGAGGTCGTCGGCGGCCTGCTGCGGGAGCTGGAGCTCGCCGAGCTGATGCGGCGCGAGGCCACGCGGCGGCCGCTCGAGCAGCTCCAGGGCGCACTGCGACGGTGCTACG…
Seq_24457	Sobic.003G201400	RTM2	Arabidopsis thaliana RTM2 (RESTRICTED TEV MOVEMENT 2) (RTM2) mRNA, complete cds.	Arabidopsis thaliana	CGCGGACGCGTGGGCTCACGGCCACGGACCAAGCTACCAAAGTCACCAGGCTCATCATAAACACAATCAGCACGCGCGGCGCCGTCTCAGTCTTGTCGAGACCACCGGCGGCAATGGCGAGCATACAGGCCCCGGCAGCGGCCGATAACGTGGACCCCGTCTACGAGTGGCTCGACGACGGCGCCAGCTACCTCCTTCTCCTCAACCTCCCAGGGTTCAAGAAGGAGGACTTTCGGGTGCACGTGGACAGCGAGGGCCGGCTCACCGTCATCGGCCACCGCAAGCCCACGCCCGGCGGCGACGGCAAGGCGCTGCGGTTCCACAAGACGTTCCAGCTGCCCAATACGGCCAACCCTGACACCATCACCGGCCGCTTCGACAGCAACGTGCTCACGCTCA…
Seq_244584	Sobic.003G031100	Pto	Lycopersicon pimpinellifolium Rio Grande-PtoR protein kinase mRNA, complete cds.	Solanum pimpinellifolium	CGGAAACTCTAACGCGACGACCGCAAGTCTTCGGTTCGTTCCTTCCAGGCAAAATGTAAGAGTACTCATTTAGGTAGTCAAATTCAACTCATACCCTGCACTCGGAGGATCGAGAGAATCAGCAAAAGCATGATGCTTGCTAGCTGCCCAGCCAAGCGAAGGCCAGCTACTAGCTAGCAATCGATGGAGCAGGTCTGCAGCCTGCAGGTGTGAGCACAATTAGTCGACGATATCCATGGCCGATCCGGTGGCTAGCGTGGAGAGGATCATCAAGGTCGGGCTGCGGATCAAGGAGGCGGCCGACACGGTGCGCCGCAACGCGGCGGTGTGCCAGGAGATCAGGACGCGCGTGCTCAGGTTCGGCGCCGTGCTCTCGCAGCTGCAGCGGGCGGGCGCGGT…
Seq_244585	Sobic.005G207000	RPG1	Hordeum vulgare subsp. vulgare RPG1 (Rpg1) gene, Rpg1-Swiss Hv 489 allele, complete cds.	Hordeum vulgare	CGGAAACTCTAACGCGACGACCGCAAGTCTTCGGTTCGTTCCTTCCAGGCAAAATGTAAGAGTACTCATTTAGGTAGTCAAATTCAACTCATACCCTGCACTCGGAGGATCGAGAGAATCAGCAAAAGCATGATGCTTGCTAGCTGCCCAGCCAAGCGAAGGCCAGCTACTAGCTAGCAATCGATGGAGCAGGTCTGCAGCCTGCAGGTGTGAGCACAATTAGTCGACGATATCCATGGCCGATCCGGTGGCTAGCGTGGAGAGGATCATCAAGGTCGGGCTGCGGATCAAGGAGGCGGCCGACACGGTGCGCCGCAACGCGGCGGTGTGCCAGGAGATCAGGACGCGCGTGCTCAGGTTCGGCGCCGTGCTCTCGCAGCTGCAGCGGGCGGGCGCGGT…
Seq_24461	Sobic.001G239400	RTM2	Arabidopsis thaliana RTM2 (RESTRICTED TEV MOVEMENT 2) (RTM2) mRNA, complete cds.	Arabidopsis thaliana	CTCAATAAACTACTGTGCCGTGCATACTCCTCTCCCAGACTTTCCTTGGAttttttttttCAATTTCCCGTTCGTCCACCATCATCTCTGAATCGGGAGGCAGAAGAGAAGCCAGAAGCGGGTGATCCATGGCTTCCAGCGAGCGCGTGTACGAGGACTTCGTGCCTCCGCACCAAATGGAACGCGAGCCGGCCACCCACACCCTCACCGTCGACCTCTCCGCCCAAGGGTACAAGAAGGAGCACGTCAGGGTGCAGATGGTGCACAGCCACCGGCGCCTGATCGTGCGCGGGGAGCGCCCCGTCGGCGGCAACCGCTGGAGCCGCTTCCGCCTCGAGCTCCGCATCCCCGACGGGTGCGACGCCAAGGCCATCCACGCCAAGTTCGACAACGGCGTCG…
Seq_244687	Sobic.010G228000	Pid2	Oryza sativa Indica Group cultivar Digu B-lectin receptor kinase (Pid2) gene, complete cds.	Oryza sativa Indica Group	CCGGCCCCGGCCGATCTGCTCGTCCGCCCGCCCGCTCGCTCGCCGAGTCAACGGCTTGCGCCCGCCACGCTCGTATACGAGTAGTACATGCCTTCCCTGTCCTCTCCTCTCTCCCATCCGTCCCGCATTGCAGAAGCCGGAGAAACTTCCAAGCCCAAGAAAAAAGCTGCCACCTTTAACTCGATCCCCTCCCTCTCCATCCTGTGTCCGTGCGGTGGCGCCGGAGCGGAGAGCCTCCGGCGAACCGGGGCTACTTGCTGCGGCGCGCTATTTCAGCGGTTTTGTGCCACGGCGGGACTGAACCGCCCGGGCTGCGCTGTCAGGATCACCAAGCCGGAATAAGTTCAGTTGCACTGCGCTTTAGCGGCTGGATTCGCCTCTCGCCGAGCTCCAGGATAC…
Seq_244804	Sobic.001G079200	FLS2	Arabidopsis thaliana FLS2 (FLAGELLIN-SENSITIVE 2); ATP binding / kinase/ protein binding / protein serine/threonine kinase/ transmembrane receptor > (FLS2) mRNA, complete cds.	Arabidopsis thaliana	CTCCCGTCCAAAAAATGAAAACACACACGAATGAAACCATCCTCTGACAATGAAACGGGTTAGTCTGCCACGAGGAAGTTTGAATCATACATGGATCTACGATCTCAATCCCCTTTTCCAATTGACGTGCATTATTACTTGGCCCCAAAAAAAAATCAATAATGATTACATCAAGTATGATCATTACACAACATCAACAACAACACGCTACAACTACAACCCTAATGTCCTATTTGTCCGCACAATAAGGACCATTAGTTTTACCTACAGCTACACCCTAATAAATATGTTACATGGGAAATGCAATCATTTCCCCAGAAATCAAACAGTACAACAGACTTCACAAGGCTCCTCATTTAGCAGCATTTCCCTGTGATCATACCGTGGTGATCTCTTTAC…
Seq_244858	Sobic.001G197300	Pid2	Oryza sativa Indica Group cultivar Digu B-lectin receptor kinase (Pid2) gene, complete cds.	Oryza sativa Indica Group	CTCCTCCCCCACCGGCGACCTCCGCCCGATGTCCTTTCCTCCCCCACCACAGCCAACGCCTGCGTCGCCCGCACGCATCCCTGCCTTAGGTGGATCTGCGCGCCTTTTGTCACCGACGTGCTGGCGCTGCCAAGAGTACCGCCTACCCCCCTAGCGCAATGGGCGCGCGACCCGGCCAAGAATGGGACGTCGACCCATCTCGTCCCCGTATCTGGATTTGGGTCGGCGAACCTGGTACGTGGTTCGCGGCTTCGACCCCGAACCCTGTGACTATGCGTGCGTGCGCCGCCGTTGGAGAAACTCGACCAGCGGCAGCGCATCCTTATTTTTCTTTTCGATCTCATCATCGCTGCCCTGATGCGCTTACTGCAATCACAGCCACCCTGACGATGTACTGAG…
Seq_244861	Sobic.007G149900	Serk3B	Nicotiana benthamiana SERK3B (Serk3B) mRNA, complete cds.	Nicotiana benthamiana	CCCTGTTCAGTGACCAATTCGCTGCACAATTAAGTCGAGATGACAAATGACATGGGCAGTTACACCAATTATGACTAACACGAACCCAAAAATTGATCAAAAAAATTTCGCAACCAAACCAATGCGGCATGGGTCTTCTGTGTCTTGCTGTGCCACACCAATCTACGATCTAGCTTAAATTTATGTACACATTAATCTCTCCTTTTGCTGCTTGTCTCCTAACACTACTAGTACGTGCCAATTGCCATGCTAATTAACCATGAGAGCTACTGTACGCGCCTACGCCCCTCTCTCCTTGACGTAGCTGGACGTCCTCCGGTGCCGCCGCAGCGCGCTAATGTGCAGCCCGAGTTCGCCGCCGTCCCGGTCCCGGTGCAGCACCACGTCAGCGTGGACCGC…
Seq_245041	Sobic.004G089200	Lr34	Triticum aestivum chromosome 4 clone BAC ABCT5; BAC ABCT33 map 4A, *** SEQUENCING IN PROGRESS ***, 7 ordered pieces.	Triticum aestivum	AGATATAAATGTTACATGTATTTTTTATAAATCGAGTAAAACTTATGCCACGCACGCCAGCGGACGGAGGAAGTATGCACCAGGGCCGGATCAGTCATCAGGTCACAGTGGACATGTCACTCTGCCTGGCCACTCTGACGAAGACGTCTTCCAGCGTCGTATCAGCCAGGCCCCAGGCAAGGATGTGCAGGCTGCTCTTCGCCTGCTCCATGGCCCCGAAAACCACGGAGATCTTCATCCCCTGCTTCGGCAGCTCGAACTTCTGCGTTCCCGAGACGCGGTACACCCTGTTGGCCGCGGGCGAGATGGACTGCACCAGCCTCTCGACCTCCTCCTCTTCGCCGGCCGGAGTTGTTACTGTGAGCACGCATGAGCCTCCGTACCTGTCTTTCAGCTCTT…
Seq_245220	Sobic.002G379400	RFO1	Arabidopsis thaliana RFO1 (RESISTANCE TO FUSARIUM OXYSPORUM 1); kinase (RFO1) mRNA, complete cds.	Arabidopsis thaliana	TAATTCTTAATGGCTAAAATGAAAAAAATACACATTGGCTACACGCAGCAGATCAAAAAATCAGGCTGAGGCAAAGGAAGACAGAGCCATCAACATACAACACATTGTGGCACTCATGAAACTGCCCAGCTCATACAGGGCAAACAGAGGAGCTGGGCAACAATTCAGCAAGAATGCAGCACATAACGTCTATTATTTATCCACAGCGTCACTACCTTGATTACACAAAAGATGTGATATTACAACAACAAAATGGGAGCTCGGAGCTCGCTGAAACAAACAAGATGGAATAACAGCAGAACACAAGACAAGACCAGAAGGGTGGGGGAGAGTCCACAGCAGCAACGGCGCCGGCAGCCTGAACCACGTCACAAGGCACATACAAAGTCGCCGCTGTCC…
Seq_245440	Sobic.006G208900	Serk3B	Nicotiana benthamiana SERK3B (Serk3B) mRNA, complete cds.	Nicotiana benthamiana	GCTAACACCCCGCACTTACTACCAGGAGAGAGAAAAGCGAGAGGCGACTCCACTCGTCTCGTCTCCCCTCTCTCCTCCGGTCCTCCCCTCCTGAGCCGTTCCCCCCCCCTCTCTCTCTCCTCCGCTTTCCTCTGGTCTCTGGTCATCGCGCCCGTCTTCCCCGCTCTGACTCCGTCCCGAGCGGCCGACTCCGCCCGCGCCGCCGCCTCCCGGACGCGGCCCCCCACCTCAGCGCCGCCGCCTCGCCCCGATCGACCCTCGAATCGCCGGAAACCGTGGACTTCGCGAGGTTGTGTCTTTACCTCCAAGCGGTGAGAGAAAGATAACAGGGCGACAGGTGAATTGCCGAGAAAAGGAGAACATTTGGTTGTTGCATGATGGTGGAAGGCCCCAATTTCG…
Seq_245486	Sobic.002G025100	Serk3A	Nicotiana benthamiana SERK3A (Serk3A) mRNA, complete cds.	Nicotiana benthamiana	AATGATGTTCTCCAAGAGCTTGGCCTTTGCCATTCTGTTCCAGCTCCCACTCGTCTTTGCCGCCATTGATGAGTTTGTCTTCAATGGGTTCAACGGCACTGCCGACGGCTGGGTCCTCGACGGTTCGGCTGTGATACTGCCAACCGGCGTCCTCAGCCTCGCTGCCACCAACAGTGTACACAACGACTATGAATCCTTCTACTCTCCTAGCCACGCCTTCTACCCTTCTCCTTTCCAGATGCGAAACCTCACCGACGGCTCCCTCTTGTCCTTCTCCGCCACCTTCATCTTTGCTATACTTCCTTCCAATCAGTCGCCTTACAGCTTACCGAGAAAAGGTGACGGAATTGCCTTTTTCCTCGCCCCAAACACCAGCTTCACCAGCTTAAGAACTAGTTA…
Seq_245538	Sobic.004G052000	Serk3A	Nicotiana benthamiana SERK3A (Serk3A) mRNA, complete cds.	Nicotiana benthamiana	TCGCCTCGCCTTACGCCACGTGGTCAACGGTTTTGACCCACCCCTCTGCTCCGTCCGCCATTCTTCTTCTTCCTCGCCCAGCGACCATCCACCTTTCAAAGCCGAGAGCGCCCCGTCCTCCCCTTCCATCCTCCGCACCGCGGCGGACAAGTCAAATACCGCGCGTACCACTTGGAGCCAGCCAGCCACCCACCCGGCACCACGCCACGAGTCCACAGTCCGCGTGCGCCCCGGAGCCGTCGTCACCCGTCCGTCCCGGCTTCTTCTCTTCTCCTTCTTCCCCCAGGCCCCCACCTCTCGCGAAAGCTCGCCGCTGCTGCGTCCCCGCCCCGTGGCGGCACGGCACTCGTGGGGAAACCGGCGGAGGCTTCGCCGAGCCTTCGGGGGCGACTGCGGAGG…
Seq_245539	Sobic.004G052000	Serk3A	Nicotiana benthamiana SERK3A (Serk3A) mRNA, complete cds.	Nicotiana benthamiana	TCGCCTCGCCTTACGCCACGTGGTCAACGGTTTTGACCCACCCCTCTGCTCCGTCCGCCATTCTTCTTCTTCCTCGCCCAGCGACCATCCACCTTTCAAAGCCGAGAGCGCCCCGTCCTCCCCTTCCATCCTCCGCACCGCGGCGGACAAGTCAAATACCGCGCGTACCACTTGGAGCCAGCCAGCCACCCACCCGGCACCACGCCACGAGTCCACAGTCCGCGTGCGCCCCGGAGCCGTCGTCACCCGTCCGTCCCGGCTTCTTCTCTTCTCCTTCTTCCCCCAGGCCCCCACCTCTCGCGAAAGCTCGCCGCTGCTGCGTCCCCGCCCCGTGGCGGCACGGCACTCGTGGGGAAACCGGCGGAGGCTTCGCCGAGCCTTCGGGGGCGACTGCGGAGG…
Seq_245545	Sobic.009G190700	RPG1	Arabidopsis thaliana RTM1 (RESTRICTED TEV MOVEMENT 1) (RTM1) mRNA, complete cds.	Arabidopsis thaliana	ACTCATAAAAAGATGGAGCACCCTGCCTCTGCGTTCATAACAAGCAGCAGCACATTCGAATATTGGGCATGCAGAACTGACAAAGGATGTATTGAAATTCAACAGAGAGGATGATGTACTTGGACAACTACATCTCTTCAATTCGATCGATACGTTTGGAGAATGCCCCGAATACAGGGAATGAAGACCAACAGATGCTGAAGCTACAAGTAAAATTAAATCGACCAGCCCAAAATTAGATACGTCCCTCTCGTATAAGCTGAAGCTACTACTACGTGTAAACCGACCAGCCCGGTGATCAGAATAGGTACTTTGACAGCACGTACTTGGGGGCAGGCCTCCTGTCCCCGAGCCAGTGCTGCATGTGCACGCCGATGGCGTCCAGGTGCTGCCCGCTCC…
Seq_245584	Sobic.004G338000	RFO1	Arabidopsis thaliana RFO1 (RESISTANCE TO FUSARIUM OXYSPORUM 1); kinase (RFO1) mRNA, complete cds.	Arabidopsis thaliana	AAGTACTGTTTGCTGATTTGTTGTAAGAAAAAAATATTATTCCAACTGAAAAAATAAGCTAAAAAGTACAAGACCAGTGAACAGGGCATATAAACCTGTACGAAAGTCACATCAACTTCGTGACATGAACGTATAATTATTTGAGGTCTCATTCAAGGTTCTGATGAAGTACTAGAAACTACTAGTACTTTAGAAGACACAGAACTTCGGTAGAAAATGGAAGAGACACACAAGCACACAGCTGAAGCCTGAAGCTGAACTGTACATAGATTTTCTGGGTTTTTTTGGGTTCCATTTTCTCCTGAACAGAGCTAGACCTCTCTTCTTCAGCCCGAAGAAGGCTATACTATACATGGTTTGCAATGCAAAGATCAAGCAATACGAACCCAGGAAGAGGAA…
Seq_245878	Sobic.003G325200	MLA10	Hordeum vulgare MLA10 (Mla10) mRNA, complete cds.	Hordeum vulgare	GCGACTTGCCCCTCGGACTCAAGAGTCAAGAGTCTTCGGCAATGGAGGGCAGGAGCCCCTCTGTCCTTCTCCTTCGACTACTCCAGCAAGCTTCAACGTCGCCGGAGTAGGTGGAGAGCGGCGGTCGCACCAGGACCAGTGGGACCACTGACACGCGGGCTGTAAAGTTGTGATGAGGGGCAGACTGCATATATGCCCGGCCGAGTCAACCAGTCAAACGCTCTAGTCGTCGAGGGCTCGAGGCGTAACCGCGGTAGTCATTCGATTCGACGCATTGTCTAGGCACACCCTGTGTCACCCTGCAGCCTGCACTCGTGACTCGTGAGGGTCATTGGCTCATTGCGTCAGTCAGTTGTGCGCCGTGCCTCTTCAACTGCTCCGGCGGCTTTGTCGCTGGCC…
Seq_246125	Sobic.009G188100	Pid2	Oryza sativa Indica Group cultivar Digu B-lectin receptor kinase (Pid2) gene, complete cds.	Oryza sativa Indica Group	CATTGAGCTAAGAGGCCAAATGCTACCAAAACTCGATCAGCCCATCGCAGCCCAGCTTACACTTTCTAAGCCGACGGATTTGTTCGTATGGGCCTGATCGGAAGCCTCGCAGGGCCCAGATCTACAACTTCGCTGGAAACAAAACCGCAGTGTCCGTCCCATTGGCAATGACGGACTGACCTGACCAACACACGAAACAATCATACGGATGCTGCCGTCTTGTCCACCACCTGCGAGCTCGTTGCTCCGCTAGTACACTCGCCGCGATGGCGCCCAACCACCACCTCCGCCTCCGCATCCGCCTCGCCGCGGCTCTTCCTCTGCTGCTGCTTCTCCCCGCGGCTTCCCGCGCCAGGGACACCATCGCGCCGGGCCAGCCGCTCCGGGGAAACGACACGC…
Seq_246191	Sobic.009G203600	FLS2	Arabidopsis thaliana FLS2 (FLAGELLIN-SENSITIVE 2); ATP binding / kinase/ protein binding / protein serine/threonine kinase/ transmembrane receptor > (FLS2) mRNA, complete cds.	Arabidopsis thaliana	GGACTTGACGTCGCGGTGCACGATGGGCGGCGAGCACTCGTGGTGCATGTAGAACAGCCCGCGCGCGGCGCCGACGGCCACCTTGACCCTCGTCGGCCAGTCCAGCGGCTCCCGCCGGACCGACGGGGGACTCGCCATGGCGCTCCCGGCGGTCCCGGCTGGCCTTTTGTGTCCGTGCAGCCACTGGTCCAGGCTGCCGTTGCCCATGAACTCGTAGACGAGGAGCTTGGTCTCCGCGCGGGAGAGGCAGCACAGGAGCTTCACGATGTTGCTGTGCCGGATGTGGCCGAGGATGTCCACCTCCGACGCGAACTCGCGCTCCAGCTTCTTGTCCAGACTCCCGCCGGCCCAGATGCGCTTCACGGCCACGGTGCCCCCCGCTTCGCCGCTGCTCCGGCT…
Seq_246296	Sobic.001G382800	Lr34	Triticum aestivum chromosome 4 clone BAC ABCT5; BAC ABCT33 map 4A, *** SEQUENCING IN PROGRESS ***, 7 ordered pieces.	Triticum aestivum	GTCTGGTCCTCCCATTATCCATATGCGTGTCGCAGAACATACAGGCATGTTGAAGAACGAACCACGGTAATGACAAGTTTCAAATTTCGAATACTATATAACAGTTTGGAGACAACCGAATTGCTTTCTAGGTCTGAACATCTGTGACAGTGCTAAAAAATGTTACAAAAGTTCATACAGCACCAGTCTTGATAGCCAGAGGCCTGAGTAAACAAGTAATAATATTCAAACATACAAAATTTGGACCTTGTATGCACGCACGATATGCTATCCCTATGTATGACTACTTGTATCAATATCTTGATCCAACGATTCTTACAGAGAGCAGGTGGTGTATCCAGCTCCTCACCTTCAAAAGACATGCCTGGTCGAACCGGGTACTAACTCAAAATTTTAACT…
Seq_246343	Sobic.002G195800	EFR	Arabidopsis thaliana EFR (EF-TU RECEPTOR); ATP binding / kinase/ protein serine/threonine kinase (EFR) mRNA, complete cds.	Arabidopsis thaliana	TGTATGATTTTTTCTCTAGTCAAATACGATTATCATTTTTGGATGGAGGGTATTCTGAGCCATTTTGCTCATGCTCCAGTTCAGCCCCTTTATTCCGTCGAAGCGGGTTCTTTTAAAACCCAAGAATTATTCAGCATATTTTCCATGGAAAGGTCCGGCATCTGCAACACAATATGAAGCTCTGTATCTGGTTCTGGAAAAGCAAAATGCTGTACCTGCATCGAATCTTAGACCACGTCAATCAGAAATTCTCCGAAATTCAGAATTTGTTCAGTTATTCAGATGTTCAAAGTTCAGAGCTGGGATCAGGATGAAACGTTGCCTATGTATGTCGTTCGTCCCTCGATGGACGTAACGACATACGTAGGCAACGCTGCCAGTCTCTTCCACACCATCAAA…
Seq_246386	Sobic.007G073400	Serk3B	Nicotiana benthamiana SERK3B (Serk3B) mRNA, complete cds.	Nicotiana benthamiana	CTTGCACACGCCCAGCCAGCATACAAGAAGAGCACTGCATTATATATAAGTTGAGAGTATTCTCAGCCTATTGTTGCTTTATGAAAGAAACAAAACATTTTTTTAAAAAAAGGGGCAGAGCTCTGCTTTCATCATTCAAACAAAATACATATACCCGGTCAAGTTTTTGTTTTTTTTCTTAACATGCTAATCTAGCAAATCGACTTGTCTTCCACATATGTCACATAAAAAACATCGTTCAACTATGTTCATAGACTTCTCGTTCAGATCGAATTAATCCAGCAGCAGCCTGCAATCACCGCCCATCGTCAATGACTCCAGTCATCGCCGGCGACGGGGTGAGAGGCGCGATCGTCTCCCTCTGCATGCTGAACTCCCCGGTCGTGTCGCCAGAGTAGT…
Seq_246387	Sobic.010G030300	FLS2	Arabidopsis thaliana FLS2 (FLAGELLIN-SENSITIVE 2); ATP binding / kinase/ protein binding / protein serine/threonine kinase/ transmembrane receptor > (FLS2) mRNA, complete cds.	Arabidopsis thaliana	ATTTTCGCAGGTGAAGCCGGAGCCCTCCAGAGAGGCCCTAACTTAACTGCAGAGCTACCTTTAGCCGCCATCTCCCTCATCAGCCGCTGGTTCCACGCTGCCTCCTCTTGACTGACTCCACCTGACCGCCCGCCGCAGGTTTCCCTCGCCATGGCTCCTCCTCGGACTCAGAGTAGCAGCTAGGAACAGTAAGTGTGTGGGCGCGCGCGCGCGTGTGATCCGAAGAGACGAGAGGATGGAAATCGAGGAAGCCGGCGGCGGCGGCGAGATGGGGGAAATGGAGGCGCCCGCGGTCAGCACGGTGGCGGTGGCGGTCAGCGGTGGCAGGAGCAGCAGGCACGCGCTCAAGTGGGCCCTCGACAAGTTCGTCCCCGAAGGGAGGGTCCTCTTCCGGATCTT…
Seq_246389	Sobic.003G251200	Pid2	Oryza sativa Indica Group cultivar Digu B-lectin receptor kinase (Pid2) gene, complete cds.	Oryza sativa Indica Group	ATTGAATTGTATTTCTGAGCCTCGCAGATGGATTATATTGGAGTACTCCACTTATGGGCAAAGACACCTCTCTTATAGGTAAGGAAAGCTGAGATTACACGATCCTAATCTATCGTATTTGGAGATATCCCAACATACTCTAACACAAATATCACAATCTGCCACGCTTTACAATATATTTCATCAGTACGTTCAGTTCATCTTAAATCCTGTAGTAACATGATCAAAGGTACGCTTGGCATGAAACGTGTTATGCCTGCTGCTCAAATCTTTGCATCTGTTGCAAGTCAATATGAATAAGCAGGATGGTAGTCGTCTTCATCATCACATGACATGAGCACCTTGACAATTTCATCCATGGTTGGCCTCTTGCGTCTTTCTTCGAGGCATGAAAAGGCT…
Seq_246782	Sobic.007G105600	RFO1	Arabidopsis thaliana RFO1 (RESISTANCE TO FUSARIUM OXYSPORUM 1); kinase (RFO1) mRNA, complete cds.	Arabidopsis thaliana	CTGGATTTTCTTTTTTCATATGATAATTAAGACTTCTTATGGTAATAAAATAAAAATTACGGCAACAAAGGTTATAGGAAAGATTAGCCCATATCAATACATGATGTCTATTCTAGCTATGATGCTTTTTACGTACATACTTGGCAAAAAGCTTGTCTCTCTACCGAGGATACCTTGCAGACATCAAGATTTCTTCTTCCATGCTATATATTCGGCTCCACTCTTGCGTGCTTCGTCTTTCCATTTTCGATGAGCAATTCATCATAACAATGTCATTCTCTTCATTTGTCTCTACATTCATATCAGTTTGGACATACTTCTTGGATACAAGACCTTCGAGCGCATGTTCCACCTGTCGCATTGTGGGCCGGTCCTCAGCATTTAACTTTATACATGATG…
Seq_246883	Sobic.002G362900	RFO1	Arabidopsis thaliana RFO1 (RESISTANCE TO FUSARIUM OXYSPORUM 1); kinase (RFO1) mRNA, complete cds.	Arabidopsis thaliana	CGTTCGCCTCCCCTTACCAGTGAGAGACACCAGTGCACCAGAGTAGAGTAAGATGACAACAAACAGTTACTGGATTTTACTTTTCATTTTCTTCGGAGGCTACCTTTACTACAACCGCACCATCTTGGGCTGCTTATTGGTTCCAACTACACACTCGTCTGTTCAACCACACTGCCCCGTCAGCCGTTAATATTTCTTTGTACAACAAAAATGGATATGGCACTGGCGTCTTCGGGGAATCTACAACACACGCCTGAAGCAGCGAGGCACAGTAGCTAAAATTTTGCTGTGAGCTGGGATCATCAAAGTTCACGATGTCTTCAGTTAATAATGGAATCGTCAGCCTTCCCAGACTGGCAGCACAGGCCATCAGAAGCTAATGACATGCTCCCCCGCACT…
Seq_246910	Sobic.002G075400	EFR	Arabidopsis thaliana EFR (EF-TU RECEPTOR); ATP binding / kinase/ protein serine/threonine kinase (EFR) mRNA, complete cds.	Arabidopsis thaliana	TTGTCCTAAAATTAAACCATAATGCCATCAAAATCTCTCTGCTCCTTCTGGATTGTACTCCTGCTTTCCGCCACACTCCGTAGATAGAGCCCAACATGTTTAGGTTTGGAAGATGCCTAAGATCAAAGCAAGGCAGGATAATAGTTGAAACCACTTTAGTGAAGGGGTAATTTTTGCAAAGATGCTTGGGTGATCGGTCAATGAATAAATTAAATGACATATAAGATTGTTTTGGGTGCCATCTCCTCTTTTATAGATTGTTTGCGTCAAAAATTTTCGGTGCATTAGCATCAAGGTGAAGAACTTGCAACGTGGTTCTGCTCAATCTTCCAGATGGTCTAAAAGAAGCATAAAACAAGTTGACGTCAGTCAACGGTCGAATCCTGCTTTCTAAAAACC…
Seq_246930	Sobic.004G205600	RPG1	Arabidopsis thaliana RPM1 (RESISTANCE TO P. SYRINGAE PV MACULICOLA 1); protein binding (RPM1) mRNA, complete cds.	Arabidopsis thaliana	AACAACCCAGGCCAGCAATCTCAATCGAGGATGCCATTTCTCAATGGCATGTTCAATCAATAAGAGCACTGGCGTCCTGATGAACAAATGTCACACGGAAGACACTGATTGCGCAAGAAATGGTAATTACAGAGAAGCCTGGACGTGCATCTGCAAAACAATTTCTCTTGTAAATGCTGAGCAAGAGCAGTTCTTTTCGCTCATGCTCAACAAACAGCTAGCACTTCACTACATCAAAATTCGGATTTACAGCAGGAAGCAACTAGCCCAACTGCTACACAATCTAAAACAGAGAAAAAAAAAGATGAGAAAACAGGCTATATGAGCCGCTAAGCAAACCCGCTTGAAATGGAGGTTGCAGCAAATAATGAGCCATTTGAACTCCACTAGTTCGGTGGC…
Seq_247238	Sobic.005G012000	RFO1	Arabidopsis thaliana RFO1 (RESISTANCE TO FUSARIUM OXYSPORUM 1); kinase (RFO1) mRNA, complete cds.	Arabidopsis thaliana	TTTTTTTAAAGGATCAAACGCAATTATTTCATTATTGATAGGGACAACCATTACACATTACAGAACAGAAACAGTTTTCAGAATGGAACGACTGGACAACTCAGCCTCTCAACAATTATTGCGCAACGGAATGGTTCACAGAAAGAGAATGCAATTACTAAAAAAAGAACACACACATGTCGAACAGAATCACTCTGAGATGAAAAATCTAACAAATTTTGGGAACAAAACTGAGACATCCAAAGGTACTACTCCTTTTGCTGTTGATCATCTCCATGCCAGGCCCAGACTATGTCCTTCAGTGCTGGCCGGATGTCCTCTTCCAACAGTTTCTGGTACTCAAGTGAATCACCGCCTGTTTGTTTGATCTCAATGAGATGGTAGGATGCCGTGATCTCA…
Seq_247244	Sobic.010G054100	Cf-2	Lycopersicon pimpinellifolium leucine rich repeat protein Cf-2.1 gene, complete cds.	Solanum pimpinellifolium	GCGCCAGCCTTTCCCCACAGCCCGTCTGCCATTTCGCATCGCCCAAAAACTTCGAAACCGGCGCCGCTGCCCCGCCGCATCTCCCGTCGCCGACCGGATCCTCCCGCCTCCCACTCCCCGACGCGGTCGCGTCAACTCCACCTGCACCCTCACGACCTCGTCTCCGCGGGCGCACATGATCACGCGGTCAAACCCCAGAGGCAGAGAGACCCAGCCCTCCCGCTCCGCTAGCAAGTACTAGCAGCAGCAACCCAATGCTGTGCTCCTCCCACCACACCTCCAGGCCTCCACCTCCTCCTGCGCGCACAAGTCAACTCCCGCCTGCGGCCGCCGCGCCCCACGCCGGCCCCCATGGCTCGTTCCGCGCCCGCTTTCGTCGCCGTCTTTCTCCTCGTCCTC…
Seq_247299	Sobic.004G106400	RFO1	Arabidopsis thaliana RFO1 (RESISTANCE TO FUSARIUM OXYSPORUM 1); kinase (RFO1) mRNA, complete cds.	Arabidopsis thaliana	TCCGCTTCTCCACCTCCTTCGCCTCGTGAACGAATCCCTAACCCCACAATTAAAAGCAAGCAACACCCGCTTCCCACCTGCGCTAATTAATCACATCACGAGATCCCCTTCTCCACCTCCTTCGCCTCAGTCACACGCCTCGATCTCGCCTCGCCGCGCTCCCACCACCGCCACCACCCCGGCCTCCTCGCTCGCGACGCACCCAGGCGCCCCCCGCAACCCGCGCGCCGGATTGGGTTCCGCCGGGAATCCCGCGGCGAGCCTCGCCGCCCGCGCCACAGGGTGGCCTTGAAGGATGATAATTGAAGAAAAATGATTCTCTATTTCACCATATTTTGGAGATGGATGATCTGCCAAGGGATGAAGGAAGATCCCAGACACACCCTTCAGATCGGAATT…
Seq_247323	Sobic.003G329300	R3a	Solanum tuberosum potato late blight resistance protein R3a gene, complete cds.	Solanum tuberosum	GGTCAACATGTCAACACACGCTTTGCCCTTTGGTCCTCTAGGAGTCTGAACACCTTTCAGCCTTTTCCCACTTATTTTAGCCCTTGGTGCCAAACAACTGAAACAGACCAAGATTAAGGCCAGAAGAGGAGGAAACACCGAAACATACTCCCATGGCTGCAGAAGCTATTTTAGGAGCCTTTATGCAAACCCTCTTTGAGAAACTCTTTGAAGTAGTTCATGATCACTTCAGATCTTGCAGAGGCATCCACGGCAAGCTAGAGAACCTCTCTTGCACTCTGTCTCAATTGCAGGCTTTCCTTGATGACGCTGAGGCAAAGCAGTTGGCAGATGCGTGCGTGAGAGGATGGCTGGCCAAGCTCAAGGATATCGCGTACGACACTGATGATCTGCTGGACA…
Seq_247451	Sobic.006G000600	RFO1	Arabidopsis thaliana RFO1 (RESISTANCE TO FUSARIUM OXYSPORUM 1); kinase (RFO1) mRNA, complete cds.	Arabidopsis thaliana	CACACAGAAATACTGTTACAGGTTTGGCAGTCTCAGGGGAGGAAAAGTAGAGTGTTTAGAAATGAAATGGAAGAAAAGTTCAATGATGAAACTAACTGAGTTGGGCCAACAGGCCTAGTTCATAATTGGGCCCTAGCCCACAACCTCACACAACACAGATGAACGCTTGACCAGTCAAGGAATCTCGGCCTAACTTTTATCACATATATACTACTAGAACAAAAATCACTCAAAACTGAACTATGTTTCTCTAAATTCGACGCAAAATATGCACATGGTGACAGTGACAAGCATCATTAGGCACTGCACAACACTAATATATACTAGCATACACGAGAGATCCATGCCATCTTTACTATCTATAACAATATCAACATATAAATGCATAGATAGAAGCGC…
Seq_247679	Sobic.002G197600	Pid2	Oryza sativa Indica Group cultivar Digu B-lectin receptor kinase (Pid2) gene, complete cds.	Oryza sativa Indica Group	ACTGGAGAGAAGTGGCAGATAGGATACACAAATTTTAAATGGTAGCACACAGGCACACAGGAAAAATGAAACAGCTTTTATGGCAGTTAGAGACCCATATAATTTGTAGCGGCATTAAGAGAATTTGCTCTTTATCTTTCTCATTTTTACATACACAGTTCTTGCCTGCAGTCTACCACAGATGGACCGATCAATAGCTTAATCGTCAGCAGCATCCTAACGAAATCCAATAAGCAGATCCTACGAGCTAGCAAAACAATCATGCCATCTATACCTACTCTGCAATCCCATCCTGGAATAAACACCAACCTGAAGAAAGAAAAAGGGAAAGAATAGACAAATGTACAGTTGGGGCTCGCCCTGTTACAGCTACGACTCCTCTTCTTCTCGGTGCGAGGG…
Seq_248097	Sobic.001G306000	RFO1	Arabidopsis thaliana RFO1 (RESISTANCE TO FUSARIUM OXYSPORUM 1); kinase (RFO1) mRNA, complete cds.	Arabidopsis thaliana	GGACGTCTCTGCCTGAGAAGATTCCCTGTTTCCAGTGGGCAGAAATTTCCATCTCCTTTTCCGCGCTTCCGCAGATGAGTCGCCGCCAAGGTGCTAGCTCAAGCTCTTACACTGTATCATCATTCGTGTCCGATGAATTGGACTACTCAGATTTGTTGTCCTTGCACGAGGACAGCAGTACCGAGCGCAGTGGCTCTAGGTCTGAACTTCTGTCGTCCCTCTCAGTTGATCTGAAGATGCCCCCCCCAACAGAACATGTTCAGAGTCCGGCACCTCATAGAGATCTGGTTTGCACCAAACTTAGCATCCTGGTTCTTTATTGAGCTGTACCCTGAACTGTTTCTTTTGGTGGATGTTCATCAATTGAAGCAAGTATCCTTTGTGATGCATCTGTAACTT…
Seq_248171	Sobic.003G080100	Pid2	Oryza sativa Indica Group cultivar Digu B-lectin receptor kinase (Pid2) gene, complete cds.	Oryza sativa Indica Group	TGATTTAACATTTTTCCTGCCTCCAACCATCTCTAGCAACATCATTCCATAACTGTAAACATCTGATTTTGATGAAACAACTCCAAAGGTCCGAGAGTGAACTTCTGGAGCAATGAATCCAATTGTTCCTCTGGTTCCGGTCATTGAAAACTTACTCTCCTTGGTATGACATAATTTAGCTAAACCAAAATCAGCAATCTTTGGGCAAATATTTTGATCTAGAAGGATATTTTGGGGCTTGATATCAAAATGTACAATGCGTGTGTTGCAGCTGTGGTGCAAGTATTCTAGGCCACGAGCAATCCCAACTGCTATAATGTAGAGATTTTGCCATCCTAAAACGTGTTTGGGATTCTCACAATAAATGTACTGATCCAGAGAGCCATTGGGCATGTATTC…
Seq_248245	Sobic.003G398100	Lr34	Triticum aestivum chromosome 4 clone BAC ABCT5; BAC ABCT33 map 4A, *** SEQUENCING IN PROGRESS ***, 7 ordered pieces.	Triticum aestivum	GTTTTGAAAGGCAACAAATTTTATTGTCGTATAAAATACAGGCTAGCAGCCTAACACGATTCTACGTGAATTGCATATACTTTTTTTTACACGAAAATTCTGGAAATGAGGTACAAAGTGCTCGTAACAAAACTATAGCATTTCCTCCGTGTGTAAAATAAGTTTCAGAGTTCCCGATAACAAGATAAAAACGCCTATACACTTTTGTAGTTACATGCATGCTGGATCTGACGGGATGCGGTGGAAGCTATCTTTACAAACTCTTGGACTCATGTCTGCTCTCCATACTGCCGCTCTCGATGCTTAATGTGCTCGTCCTCGTGGAGGAAAACAGTTTTGGTTTAGTTTGATTAGTCGTAAACCGTTTCTGGTTCATGGTAAAAATAATGCCAGTTTATT…
Seq_248309	Sobic.006G218900	Pto	Lycopersicon pimpinellifolium Rio Grande-PtoR protein kinase mRNA, complete cds.	Solanum pimpinellifolium	AATTTCTGTTCCCCTTTGATTCCCTCCTCTTTCTGCCTGCGCTTTTGTCTCTCTTGTGCCGCTCTCCAAGAAACCAATCCATCCATCCATCCGCCCGCCCGCACAAGGAATCGATCCCGACTCGCCGCCGGCTCGGCTCGATCCCTCGCGCCGCCGTCGCCTTGTCGCCCCGAGGGGACGCCGCCGCCGAGGGCGACGCGTGGCAGGCAGGCAGGCACAGCAAGCGCGCCGCTTCGCCGACTCCTGCGCCGCCTGCTCTGGCTGGGGTCGGCGGAATGCGTCAGCTGTAGAGGACGGCCACGGCACCTTTTCAGCCTTTTTCCTCGTCTCCTCCTTCCTTCTCTCGGGCTCGATCGATAGCGTCTCCTGCTGCTGTGCTCCAGCCTCCGGCAGCGCCTG…
Seq_248446	Sobic.005G118100	Pto	Lycopersicon pimpinellifolium Rio Grande-PtoR protein kinase mRNA, complete cds.	Solanum pimpinellifolium	GTCCCGCATTCGGGACGAAGCCAACGACGAGCTCAGCAGCGCCGGCGCCGCAACGAGAGCACCCACTCCGTCGAGAATAGGTGTAAATTAGATTAAAAGGTATCAATGTGGCGCCGCTGTTGCTGCAATTGTCAAGTGGATGAATCCGATCAGCGTGAAAATGGTCATATCAAGGTCACAACCAACAACATCGATGGGGTGACAAAGGGGTTGAAAGATTCTGCTACTGGAAAAGTCGAGCCGCACAATAGTGCTCCCCCTATTGATATCCCTGTTCTATCCTTGGATGAACTGATAGAAAAAACCGATGACTTTGGTTCAACAGCTTTGATAGGTGAAGGTTCTTATGGGAGAGTGTACTATGCGATTCTTGATAATGGAACAAAAATGGCAGTAAAG…
Seq_248454	Sobic.003G079700	Pid2	Oryza sativa Indica Group cultivar Digu B-lectin receptor kinase (Pid2) gene, complete cds.	Oryza sativa Indica Group	GTTCGCACAGGCTGAGAGACACAGCCAAGACACAATTTTTAGAGCAGGCAGCAGGTCCGGAGGTCCCTCCGTGTCCTTGGATGGCCATGGAACTGCTAACAGTCGCATTAGCTTCCTTGCTCCTCCACGTAGCAAGAGCCACCGTCGACAACACCACCGCAAGCTGCGCACCGGCGAGATGCGGGGACCTGAGCATCACGTACCCGTTCTCGCTCAGCGGCGTGCAGCCGCCGCACTGCGGTTTCCCGGCACTCCGCCTCACGTGCAACGACGGCCGCCGCGCCTACCTCGACAGGGCGTTCACGGAGCGCCCGTACCGCGTCCAAGACATATCCTACGACAACAGCTCGCTCGTGGTGTCCGTCGAGGCGTCCAACTTCGCCGGCGACAAGACGTGCA…
Seq_248501	Sobic.006G030600	EFR	Arabidopsis thaliana EFR (EF-TU RECEPTOR); ATP binding / kinase/ protein serine/threonine kinase (EFR) mRNA, complete cds.	Arabidopsis thaliana	GTACTTGTCAACCTTGTGTTCGCACGCATTCATTGTTTTATTGCTAGATCTTGTGCACTGATTAAGTAAATCTATCATACAGACGGAAAAAAAACCATCTACTCCCTTAACGGCATCATGCGCAATTGCTAAACTCCCTGACGGCTGAATTGGGTTTCTGAAGTCGCAATCTGCTGCTTGTGCAACGGGCTTCAGCACAGCATGTAACTAAAGCCACCAGAACACAGTTGATTGCAACGTTTGCGCCTTTGTGACAATAATCCTCTATTGCTGTAGAAGAAAATTTAGGCTATCGGTGCATTATGCCTGAAGTTTATGAAACAGAGTCCAAGAGAGAACATCACAGTGTTGTCCTCGGAACATTCACTTAAATTGAACGCTTGGTTCTTTGCAGTTTCA…
Seq_248587	Sobic.004G311900	RPG1	Hordeum vulgare subsp. vulgare RPG1 (Rpg1) gene, Rpg1-Swiss Hv 489 allele, complete cds.	Hordeum vulgare	GGCATCGGCGCCTCCCAGTCCCAGGTCGCGGCTCCGCTCTCGCACTAGCGCAGCAGGCAAACCCGCTCCCTCCTCCCTCCCTCTCTCCTCGTCAAACCCCACTCGCAAGCGCGGACGCGTTCCGCCTCGCGCCTGTGCTGCCTCGGTGCCTCCCTCCTTGCTCTGCTCTGCCCTGCTCCCCACGCAAGGCCCACCGCGCGCCGGAGCGCATCCCATCCCATGGCGGCGCCGCAGCGTCCCAGGCCGCGCCAGCGGCCGCAGCTCGCGCGCATCAACGCGATGAAGCACTCCTCGTACCCCGCCGAGGACGACGGCGCCGACGACCTCGCGCCGGTCGACCTCGGCCCCGAGTTCGCGTCGCAGACCAGCTTCCGCATCCGCCGCGGGGGCGCGGAGGTC…
Seq_248901	Sobic.010G063300	Pid2	Oryza sativa Indica Group cultivar Digu B-lectin receptor kinase (Pid2) gene, complete cds.	Oryza sativa Indica Group	GCCTGTCAGACACGAAGTTGCAGTGTGGAGGTCGCGGGAGGGCCCCGGAGAACTTATCCCCCGCACCGCCCGTTTCCCACCGCCGATTCCGCGATTCGTTTCGGTGCCGCCGCAGTGGAGCGGAGCCACCGAGCCAGCCTCCTGCCGTGCCGTGCCGCGCGCGTCCGGGGCCGAACCGAGCGAGAGTGGCAAGGCAAGTGGGGATTGCGGGAAGGAAGGAAAACCCCCCGCGCGAGACTCGCGTCGCGCCTCCGGCCTCCTCCTCTCCCCCCGCGCTTCGGATTCTGTTACGCCCTCGCCAGGGCCTCGGCGAGCGGGCGGTGCGCGCGAGTGGCGGAAACCCTAGGCGGCGGCGGTGATGGCGATGGCGAGCAGGGCGCCGGCGGGGGACCCCAGCAG…
Seq_249092	Sobic.003G371600	Lr34	Triticum aestivum chromosome 4 clone BAC ABCT5; BAC ABCT33 map 4A, *** SEQUENCING IN PROGRESS ***, 7 ordered pieces.	Triticum aestivum	CACGCGTTCGCGAGCGGCAGCACCTGCACGGTCCCGGTCTCCCGGACCACCTACCGGTGCTGCGACCATTAGTCACGAGACAGCCGCAAGAGGGGCTCGACGTGCTCGGTGCTCCTATCCTCGGATCCTCCGGAGGGCTGATATGATGGAGTCCGGCGGTGGCGAGCTTCTTCCCGGACCTGCGTTGCCCATCACCTCCAAACCCGGCGGTGACCGTGGCGGCTGGCGTGCCGCCCTCTTCATCGTCGCGATGGGATTCTTTGAGCGTATTGGGTTCGTCGGCGTGTCGGCCAACTTGATCATGTACCTCACCGGCCCACTCGGCATGTCCACGGCCGCCGCGGCCGCCGGCGTGAACGCGTGGTCCGGAACCGTGCAGGTGCTGCCGCTCGTCGGCGC…
Seq_249110	Sobic.005G094800	RPG1	Hordeum vulgare subsp. vulgare RPG1 (Rpg1) gene, Rpg1-Swiss Hv 489 allele, complete cds.	Hordeum vulgare	CACTTGCAACATACATGTATAACCAGTGCAACATATGCAACATCCAAATAAAACCCTTACAACATACGTTTAAAATAGCTGAAACATTTAAAATATACACTTGCAATATACGCGTATACTCATTGCAACATATGCAATACCAGATCTTCTTTGGCAACATCCTGATGAAACATATGCAATATACATCTGAAATACATAAAACATATGGTTGAAACATGTGCTCATCTACTTGTTGCCCCTCAATGGACGCTCAATGACGCGGAGCTCGACGCCGGTACGGAGCTCGAGGTCGCCCACGGTCGACAGGCGGATAGATCGCAACCGCGGCGGGAGGCGCGAGACACGGCGGCGCACAATGCGGCGGGAGGCATGGGTGAGGGTGCATGGTGTGAGGCGCGA…
Seq_249305	Sobic.009G038900	RPG1	Hordeum vulgare subsp. vulgare RPG1 (Rpg1) gene, Rpg1-Swiss Hv 489 allele, complete cds.	Hordeum vulgare	GCGCTCGCTGCCTTGCGGCGGCCCTGCCCTCACGGGTCATGAGGACAGGAGCACACCAGCCAAGCAAATCCCCGGGCGAGAAAGTGTGAAGAAAAAGAAGCGAGGCTGTGTGTGCAGGAAAAAACAGCTCGTGGCAGCTGAGACGCGCTGGTAACTTGGGAAGCCAGGGGCCACTGGTGCTGCTGCCTGGTGGTGGTGGTCTCCCTCACTTGACGCCTCAGCTACCACTCTCTCTCTCTCTCCCCCCGCTCCATGTGGGTGGCCTCGAGCTCTGCTTAGATCACAGCTGTGCTCGTTGGTTGGGTGATCCGCCCCTTCCCCCTTGTCGGCTCCTTTCAGCTCGAGAGCTCCGGGACAGGGAGATCTGCGCTGTCGCCGCGCTCGCCTCGCCTCGCCTTT…
Seq_249346	Sobic.008G166400	Lr1	Triticum aestivum Lr1 disease resistance protein (Lr1) gene, complete cds.	Triticum aestivum	AATGTGCATGCTCTCATCAAACACAGTAAAGTGTAGATCTGGCCCTCCCATTGCAAATAGTAACATTCTGAGTTAGAAGATGCCGAAGCATTGCCTGAACCACAGCAGAATAAGGCAGTATGCATATCTCTGCGGATGAGTTTTCCTGTTAACAATGCTAATCTTTTTTTTTCTTTTTTTTTGTCGAAAATATGTATTTGGTATCAGCAACTTGTGTAAGCATGGTTGAGACGACAGTAGGGATATGATGAATTGCTCCTTCCAACCACAAAAAGGTGAAGTTTAAACATCAATTCTACTGCAATATATGCTTTAAACCACCACATACGTAGCGCAACAATAGTGCACGGAACAATATATCTCAGTGGATGGAAATTGAGTCGAAATCCACAAGTATTT…
Seq_249617	Sobic.002G137100	RFO1	Arabidopsis thaliana RFO1 (RESISTANCE TO FUSARIUM OXYSPORUM 1); kinase (RFO1) mRNA, complete cds.	Arabidopsis thaliana	ACCATAAGTAGAAGTAGACCAAATCCAAAGCTACGCTTCCAGCCTCTTGTTGCCACTTAGCTCTCTGAGCTAACCTTCCTAGGAATAATAAGCAGCAAAAGGCACAAGGGCGATGTTGATACCAATACAATTACCATAGGGTTGTTGTAAAGTGGCGCGACACGAAAAAAGTACATGTAGGGAGCAAGCTGAGAAACATGGATGAGGAAGAGGTCCATATCGCAGTTGGGAAGAACTCAAAAAAGGAGAAAGCCAACATACTATGGGCTGCTGCCAATTTCCCCAGGGCCACCATAGTTCTTGTCCACGTTCACTGGCCCTCCAAGTGGATGCCTTTCATGGGTGGCAGAGTGTTATACAAGTTCGCTGATGAGAAGGAGAAGGAGATGCATAGAGGCA…
Seq_249660	Sobic.006G131500	RFO1	Arabidopsis thaliana RFO1 (RESISTANCE TO FUSARIUM OXYSPORUM 1); kinase (RFO1) mRNA, complete cds.	Arabidopsis thaliana	CCGGATATGGACTGTCACGCGCAGAGTCCAAGCAGTAAGCACGATGCTGCGTACAAGGGGAATGTATGGCCAGTTGGCCACAGCCGACATTGCCCAATCGAATATGATATATGACAAAACACACCTTGTTTTGCCCTAGCTCAGGGAGTTGCAAATTTGAGCATTTCCTTATCAGCAACCCAACAATGTAAAATTTTTCCTGTACATGATGGATCATGCTAAACGAACTATGTACAAGGTGTTCCTATATGGGGAAAAAAATCACACGCACGCAAAAGAGAACACAGGCAAAAATGGCAAAACCGGAGGATCTGTTCTGTTGTAGAAAACCGCGCACCTTCCAATCCATCTAATACTAATAGCCCCAAAACTGCAGAATTGCACAACTACCCGCCACCT…
Seq_249745	Sobic.008G002700	Pto	Lycopersicon pimpinellifolium Rio Grande-PtoR protein kinase mRNA, complete cds.	Solanum pimpinellifolium	GATTAATTAAATTGAAGTCAAGTCAATGGGGTTTGTATGCCCGGCCATGGTGCCCACTAGTTGGCTGGCGATGGATGTGAGCAAGTCCCTAGCTAGCTGCTGCCTTGGATTAATGTCAGTGAACAGTGATCGTGCGTACGTGGGGCGTGGGCGCACGACCTGGTCGTCGATGGAGAGAGTTTTGTCTTGGATGAACAATTAGTCGTCGTCGCCCTTCCTCCGATCCTCTTATGTTTTGAGCGTCCTTGTGGCTAGTGCACATACTGAGCTAAGCTAGCTAGCCATTACGTACTATTGGGGCGGCGATGTGGGGCGTCCTGGGCAACGCGGCCACCGTTGCGCAGCTGGTCGGGGTCGACATCGCCGGGCTGATCGCTAAGATCCAGCAGGCGGCGCGGA…
Seq_249817	Sobic.004G205800	RFO1	Arabidopsis thaliana RFO1 (RESISTANCE TO FUSARIUM OXYSPORUM 1); kinase (RFO1) mRNA, complete cds.	Arabidopsis thaliana	ACTTATTTTATTGATCTAAATAGGGTCTCAGACTTTGTGTGAGAACATGCTAGTTCATGAAATAAAACATGTTATCAGCAGATTAGAACTTGAAAGTAATTTTCCATAATCATAGTTTCATTTGTTACAATATATTTTTTCGTGAACGTGCAACTTGCCTGCGTTGCATTTGTTGCAATAAAGAATCAAAGAAACTATTTTTCACCATGACCTTTTTTTTCCCTTGTAGAGACCATGCAGTCAATGAACTTCTTATTTTGAAATTTACATCTCAGTTCATTACACCAAAGTTGTATAAAGCCCCATCACAAAGCCCCTGACCTAGTGCCTCTATAGCAAAGCAGCCACCTCCTAATAATTCCTATATATGCGCAAGGGGCGTCGAGAAAAAGAGCCGTA…
Seq_249940	Sobic.006G140000	FLS2	Arabidopsis thaliana FLS2 (FLAGELLIN-SENSITIVE 2); ATP binding / kinase/ protein binding / protein serine/threonine kinase/ transmembrane receptor > (FLS2) mRNA, complete cds.	Arabidopsis thaliana	TCCTTCTCCCTCTCCCTCTCCCGCCACCCCCATCCCTGCGACGACGCGCATCGGACGTGCTCGCCCATTCCCTACCCGCCAGTGTATGTGCCCGGGCTGGCTGCGGGCCCGTCCGAGCCTGAGGCGGCGGCGGAGGACGACAACGCGGTGGACGGCAGGAGTGGCAGCGGCAGCGGGAAGCCATTAGCCATCCAACCACGGAGATGTGGGAGCCCAGAAGGTCGTAGCGAGGGGTTCCCTTGATTTGTGAATCTTTGATCAAGGATGGAGCACCGGGCTCTGCTGCTCGGCGTGGCGCTGGCCTTTCTGCTGGCCTCTGGCTCCCAGGGCTTGAACCATGAAGGCCGGCTTCTCCTGGCGCTCAAGAGCCAGATGAACGACACTCTCCACCACCTCGAC…
Seq_249965	Sobic.004G102100	Serk3A	Nicotiana benthamiana SERK3A (Serk3A) mRNA, complete cds.	Nicotiana benthamiana	CTGAGTTCTGGGACCAATTTGTTTGGCTGTTATTTATTGAGTGCTGGGATTGAGCGATGTTGAGTCGTAGATCTTCACTTAGATCATCGTCAGCAGGTACAGTCTCGATGGGGATCTCGCCACGAAGCATCTTCACCACTGAAGACATTCTTGGCCGCTGGGTTGGTTGTGCGCTTGTACAGAGGAGAGCTACATTCAGCAGCCTCAGCGCCTGTTCTTGGGAGTAGTCAGAACCGAGACGCTGGTCCACCATTTCCAGCAGCTTCCCTTGCTGCTTCAATCTTTCAGCCCAATCAAGAAGATGCAGATATTCTTCATTTGACATGCTATTCGTATTGCTCATTCCACTAACAATCTCTAGAGCCACCACTCCATAACTGTAGATGTCCGCTTTACGTG…
Seq_250001	Sobic.010G055100	RFO1	Arabidopsis thaliana RFO1 (RESISTANCE TO FUSARIUM OXYSPORUM 1); kinase (RFO1) mRNA, complete cds.	Arabidopsis thaliana	CATATGTGCTCATGAATCGATCGAAGCAAATATTGTGAGACGCCATAGGAAACTATGCACTACTACAAGAGCGCCACTGATACAGTTCCTATGCTTCTACTTCTACTCTTCAGCCTCACAGTTTTGCTGCAGTTTCAAGGCAAAGCGGTGGCTTTGCCAGGCTCCAGCTGCCAGAGATGGTGCGGCGATGTTGAAATTATATACCCATTTGGGATTGGTGCTGGCTGTGCAAGGGAAGGATTTGAGCTCGATTGCAACAAGACTACTGCGGACGGCCGCACCAGAAATGTGACATTTTTGTACAACATGCCACTGCTGAATATATCACTGCTCCAAGGTGAGATTCGCGTGACGCACCGTATCTCATCCATGTGCTACAACCAGTCGACAAGGAACATC…
Seq_250010	Sobic.004G217500	xa21	Oryza sativa Indica Group Xa21 gene for receptor kinase-like protein, complete cds, cultivar:II you 8220.	Oryza sativa	CCATTATTGAAAACAAATGACATATACAACTCAAGCAATAGCATAGTGCTATCCTTACAAATAGAACTGACGCATGTAGATAATATCGAATCCACCAAAGCATAGTACCTAATAAATTATACGAAGCAAGAAAGTGTGCTCATCAGGGGATATCTTTATTGCTGTCAGGATCGAAACACTTTCTGGTAATGAGTGACATTATTTCTTCAATTTCCATCCAAGATGTGACGTCTTTATTTCATGAATGTTGCTGGCTGTTTCTTTCATATTCGCTCGTTCGCTTGGTAATGGATGTGCACAGCAAAGTGCAACTTGCAGCAATGACGCCAAGCATTGGTGTACTACATTTTCTGGTACCATCTTATTCTGTGCTAGGTCCTTGCACTCTTCTTGGAGCTG…
Seq_250019	Sobic.008G130100	PEPR1	Arabidopsis thaliana PEPR1 (PEP1 RECEPTOR 1); ATP binding / kinase/ protein binding / protein serine/threonine kinase (PEPR1) mRNA, complete cds.	Arabidopsis thaliana	TGATAGAGAGAGCATGTAGCTCAGTCGCTCAGAAAACGAAGGCAAGAAGCCAAGAACCAATCCCAATGTTTCGTTTTTGTCTCCGACTGAGGTAGTTAAAAAAATCCTCTTTTTTTGCGAGGAAGAGTTAAAAAAATCCTGACGGCAAGTCGATGACCGTTTATGTGAATGAAGCAAAAAAGAGTCAATTTTACTACATCGATTAAACTCACGCATGATCACAATCGATCACATGTATACACCACTGTTGTCAGAACAAACAATCTACAGTACACATCATCATGCCCTTGCCAGAAGAAAACTCAAGCCCGGATTGGATGTCATTGTTAACCACGCATTTGCATTGCCACGAATCAGAACAATCCAAAGGCGCCAGCAATCCGGAGCTCAGTCACTACT…
Seq_250220	Sobic.003G069950	EFR	Arabidopsis thaliana EFR (EF-TU RECEPTOR); ATP binding / kinase/ protein serine/threonine kinase (EFR) mRNA, complete cds.	Arabidopsis thaliana	TCATCTCTCTACACCATCAGCTTAAAAAATTTATAGCAGCCAATCAAGCAATTAGTTTGCCAAATCCAGATATGAAAACCTGCTAATGCGCAACTTCACCAGCATACAATGGTATCGTCTAATGAAATTTACAGCAAAGCTTTTGCCGTCTTTTCTAAAAAAAAAGCAGCGTACAATGGTACAAGAAGCTAGTATAACAAATAACAATTGTGTTGATTTCATCTTTGTCATAGCTATGAATGAAGGTTCTAAACCGTACAATGATTTAGTTAAAAACTGGGCCTCCTGCTTTGCTGCTTCTATGATTTTGAACATCAGAAACTTAATCAGAATGATGGTTCGGCAGCTTGCTTGCTTCTGTTCCACATCCCAGTCCAGCTAGCTGGCAACCATGAGGTA…
Seq_250230	Sobic.003G268900	RPG1	Hordeum vulgare subsp. vulgare RPG1 (Rpg1) gene, Rpg1-Swiss Hv 489 allele, complete cds.	Hordeum vulgare	GAAATAGACCTCCCCCCTCCCCTCGCCAGATCACACCATCATAAATCCCATCCGCTTCTTCTTCCTGCAATTCCTCACAGACTCCACAGCGGGAGACGCAACAAACAGACCGAATTCCAACCATGGTGATGACGACGACGAAGCAGCTCAGGCGCGTGCGCACGCTCGGCCGCGGCGCGTCGGGCGCCGTGGTGTGGCTGGCCTCCGACGAGGCCTCGGGGGAGCTGCTGGCGGTGAAGTCGGCGTGCGCCGCCGGGGGGGCCGCGGCGCAGCTGCAGCGCGAGGGCCGCGTCCTGCAGGGCCTCTCCTCGCCGCACATCGTGCCGTGCCTGGGCTCCCGCGCCGCGGCGGGCGGCGAGTACCAGCTCTTCCTCGAGTTCGCGCCCGGCGGGTCGCTCG…
Seq_250287	Sobic.002G133400	RFO1	Arabidopsis thaliana RFO1 (RESISTANCE TO FUSARIUM OXYSPORUM 1); kinase (RFO1) mRNA, complete cds.	Arabidopsis thaliana	CTAACTATCTAATCCTATCCACTAATCCATCCTATCCACTAATCCTGTGGATGAGATCACTCGTAAAGAAACACCTGTTCGTGACAAGTTTGCTGGAATGCTGGAAAACGTGCCATTTTGTGCAGACCTCCGCCTGCCGTTCGTCAGCGACCAATAATAGTTCATGATAGATGTAGGAGCCCATGAAAGTTTCTTGGTCATGGTAATCAATAAAGCTGTTCGGAGATCATCAAAATTGAATCCAAAGATTCGAACTCCACACAAAGGGCGATGGGTTAGCAGCTTAGCTCCTGAAGCAACGTGACCTGCATGCACTGATGGAAGTAATATGCACAACCACTCCATGAAACAGAAAATATTCCATCAGGTCAAACATATCTGCTGCAGGAACAAAATATC…
Seq_250289	Sobic.002G133400	RFO1	Arabidopsis thaliana RFO1 (RESISTANCE TO FUSARIUM OXYSPORUM 1); kinase (RFO1) mRNA, complete cds.	Arabidopsis thaliana	CTAACTATCTAATCCTATCCACTAATCCATCCTATCCACTAATCCTGTGGATGAGATCACTCGTAAAGAAACACCTGTTCGTGACAAGTTTGCTGGAATGCTGGAAAACGTGCCATTTTGTGCAGACCTCCGCCTGCCGTTCGTCAGCGACCAATAATAGTTCATGATAGATGTAGGAGCCCATGAAAGTTTCTTGGTCATGGTAATCAATAAAGCTGTTCGGAGATCATCAAAATTGAATCCAAAGATTCGAACTCCACACAAAGGGCGATGGGTTAGCAGCTTAGCTCCTGAAGCAACGTGACCTGCATGCACTGATGGAAGTAATATGCACAACCACTCCATGAAACAGAAAATATTCCATCAGGTCAAACATATCTGCTGCAGGAACAAAATATC…
Seq_250293	Sobic.007G149700	Serk3A	Nicotiana benthamiana SERK3A (Serk3A) mRNA, complete cds.	Nicotiana benthamiana	AAGAAAGCTGGACTGGCACACACCCATAGCGGCATTTATATAGGGACAGAGGGAGCAAGCTCTTTGCACATCTCTCTTAGCTCAGTTCTCTTCCATTCTATAAGACAACTGAAGCCTGAGTGAAGAGAGCTGTAAGAAGATAGAAGCGCCTTTACTAGACGCATGCATGTCCCCATATTGAGTTATACTTCATCTTTGTTTTCTGATTGGTTCCTCGTTCCTCTATCAAGCAAACAAATTCAGAGTACACTGACAGTGCTTCTGTTTCTGAAAAGCAAAACACACAGAGGATACTTTCAGAAAGCATGAAGCTATTGACTTTCGGTTTAGTCTTATTGAGCTTCTTACAATCTTTTGCTACATCTGACTACCAAGCATTGTATGAAATGAGGATGCAGC…
Seq_250399	Sobic.005G118800	Pi5-1	Oryza sativa Japonica Group Pi5-1 (Pi5-1) gene, complete cds.	Oryza sativa Japonica Group	CGAACGTGGAGTGAAGCTGGCCATAAGTTGATCGATCCAATAATTCCAGTCCCGTAGCTTTTCCAATCTTGTTTCTCCTTCTCACTATTTGCTGTTATAACAGCAAAAGCCCACCCACCTTCAGCCGCGCGCTCACCCAAGGACACCGTTTCCACCCACAATATTGAGAGGTTCAGGCTGCAGCATCAGCCATGGTTGGCGTCGGGGAGATGCTGGCCGGAGCCGTCATAAAGGAAGTTGTCTGCAAGCTGCCTGCGCTGCTCCGGGCTTCTGTCCATGGTCCTCTCAAGAGGATTCAGGGCTTCAAGGAAGACCTCGAGGTCATGAACATGACACTCCAGTCCATCGAGGCGGTCATCGCGGATGCAGAGAAGCGGTCTATCAACGACGAGAGCGCGC…
Seq_250469	Sobic.001G019400	Serk3A	Nicotiana benthamiana SERK3A (Serk3A) mRNA, complete cds.	Nicotiana benthamiana	GAGAGAGAGAGAGAGAGAGGGACGCGCTCACACACACAGAGCAACGACGAGCAACGGAACAAGAGGGCGCGCGCGGCGAGGGGGAAGGAGGAGGCGGCCAGCCGGGCGACGGTTGCCAGGCAGGAGCACCGGTCCAACGGAACAGTCCGCGGCGCCCGAGCCACAGGACAAGAGCACGGGTTGGGGGGCAGGGGTGCCCATGGTCACGCACGCCGCAGCATCCGCCCCCGCCCCCGCCCTGTGAGTCGCCGAGCGACGCCGCGCGGCCGTGCAGATGAAGGTGTCGTCCAGGAAGAAGCAGGCGCCGCCGTCGCATCAGCAGCAGCGGGAGGAGGCCGAGGAGCAAGGGTCTCCGGCGACGGCCGAGGCCATGGACGCCGCCGCGGCGGCCGTCCAGGA…
Seq_250554	Sobic.009G020600	MLA1	Hordeum vulgare MLA1 mRNA, complete cds.	Hordeum vulgare	GATTGATGAATCTATCCCAGAGTCTATAGTGGTGGAAGTTGATCCAAGGCTACCTGCAATGTTTGAGGATGCAAAAAGGCTTGTGGGTATTGATGGTCCACGGGAGGAAATCTCTAAACTGTTGATGGGAGAAGGTGGCAGTCATTCTGGACAACTTAAAGTGCTGTCCATCGTGGGTTTTGGTGGCCTCGGCAAGACAACACTTGCAAACCAAGTGTATGCTAAACTCAGGAATGAGTTTGAATGCACGGCGTTCGTATCGGTCTCTAGAACTCCTCACATGCCTAAGATTTTGAAGGACATACTCTCTGAAGTTGAATTTGATGTCGAGGAAATGGGTGATGATGTCGAAAAGCTTATCAAGATCCTCAGAGAACAGCTCACGAATAAGAGGTACTT…
Seq_250617	Sobic.009G041400	Lr21	Triticum aestivum Lr21 gene, complete cds.	Triticum aestivum	GGAGCCTTTCAGCATTGCTGAGTTTGGAACATGCAAATCTTTCCTGGTTTCTACACAAGCTAAACTATCTCATACAATTTTTTTTCAACTCCCATGTGTGAGTTACAAAAGGCAACCCGTAGTGTGAATGAACAACGGGCAAGAAATATTTGCACAACCATTAGTGCGCAGTTTCTTGTCGTCCCTGAACAATTTTCAATGCACAACACAATTCTTGACGGAAACAAGCCAACATAAATATTATTACAGTACATCCTGCGAGATACTAGCACACAGATTGCACGACAGGCAAAGGCAAGCTTCCACAACTTTCTGAACCAATGTCAAGCTCTGGTCCTCGCCTAAAGTTTTGAAAGGCTAAGAGAAAAGGCGCATCCATACCAGAGAGAGATTGGCAAT…
Seq_250677	Sobic.007G033100	Ve1	Lycopersicon esculentum verticillium wilt disease resistance protein (Ve1) gene, complete cds.	Solanum lycopersicum	TGTCCACTCTCGATTTGGCAAGACAAGGTTTAACATACATGTGCAGTATATATATACTCTCAAGTAGCGGCAACAGAAACAAACTTACAATAAACACACCTGGAAAAGGTTTAACATACATGTGCAGTTTATACTCAAGTAGCGGCTACAGAAAGAGCCCTGGAAATCTAAGTACATTGCACAACATTACAATACCTCATCATAGCTCCCCCCATTCGCTTCCAGGAAATCACAATTTCCGTCGTTTGGACACCACACCTTCCAGCAGCGCTCAAGTTGAAGAACTAGAAGCACTTGCATTTGCTGCAAACCATCTGCTGATCTGACGCGACTGTGGTATCTGTCCCACCAAGTGGTTGTTTGACAGGTTTAGGGAGCCAAGAAAGGTAAGCTTAGTTA…
Seq_250698	Sobic.010G249400	R3a	Solanum tuberosum potato late blight resistance protein R3a gene, complete cds.	Solanum tuberosum	CCGAATTCTTGGAGACGGCCCGCCACAGTGGGTGAGCGCGTCACTGAGCCGGTATCAGTATGGACTTCACCAGGGAAGTCGTCGTCCCGGCGGCGCTGTCCGAGATCCTCGGCCGGATCTTTGCCTTCCTCTTCGACAGCTTCCCACGGCCCTCTCCCGGCGACAGGGAGCTGCACCGGCGGCGGCTGGAGCGGCTGCTGGGCAACATCGGCAGCATGGTCGAGGAGGCCGAGGGCCGCCACATCACCAACCAGCAGCTGCTCTCCCACCTCCAGGCGCTCACCGCGGGGATGTACCGCGGCCGCTTCGCGCTCGAGGTGACCGACCTCGATGACGCCAGCAGGAACGCCGTTGGCGACGACGACGACGACGTCGACGGTGACGACACTACAACTGACG…
Seq_250795	Sobic.006G246200	Pid2	Oryza sativa Indica Group cultivar Digu B-lectin receptor kinase (Pid2) gene, complete cds.	Oryza sativa Indica Group	ACACGTCCAGGGTATCCACACAGGTGAGCTCTTCTTCCTCAGCTAGTTTCCGTTTCATTTTCTTAAAAAAAGCTAGTTTCCGTTTTGTTTTGAAGATTTTCTCGGTGGTGTATTCGGGCTAGTCAGTTTCTCAGTTTGTTAATTCTGTCAGTCATATTTTATAGGAATATTTATGTGGGTTCGCAGCTGGAGATACTAGCTTCATGCTTGTGCTCCTTGCCTCCTTCTGTAGTTGAGCAATTGATGGAATGACCAGAACTTTCAGAAATTTTGTTCAGAAGCAAAATTTTGATTCCTCCCCCATGGTTTTGGCAGTAGATATCTAAGGAAGAAAATATCAGTGTGTTTCTAGTTGGGATTGCAAGCTCATTCCAGACTTTGACTGAACTGTTCATTCAC…
Seq_250844	Sobic.003G082401	Pid2	Oryza sativa Indica Group cultivar Digu B-lectin receptor kinase (Pid2) gene, complete cds.	Oryza sativa Indica Group	AGCTCTCCTGCATTGTTTGAGAAAAAAATGTTTACGCATCAGTAATTTAATTCTTAAAGGTACACTGGGATCATAACAGAGGAGGATAGCATAGATATAAATCAACGTGGTTAATTTTCTATCATCCTACGAGCTATGTCAAGGTAATAGGTAATCCTTATCACAAAATTTACATGTGCAAGTTATCAGTAATTTTCAAAATATCTTGGTAGACCTGAACAGAGTGTTGGCTTGATGCATGTGTAAATCGAGTAGGACTTGGTTTCTTATTTTCTCGAAGGACTCTGCCTTTTGATACCTGAACTTTCTGGAGAAGAGTAGCAATACAGCCTGGGCTCACACAGCCACACAACCCAAGCCTACATTCTCTCATTTATTATCTACAGCATCATGGTACAA…
Seq_250917	Sobic.002G129400	Lr34	Triticum aestivum chromosome 4 clone BAC ABCT5; BAC ABCT33 map 4A, *** SEQUENCING IN PROGRESS ***, 7 ordered pieces.	Triticum aestivum	CTGCAACGGATAGCCCCTCTTCGGCTGCGCGTGCAACACAACTGCCTGTTTCTTCGCCCCCTCTCCGCCTCCCATCGCCGCATCAGATATCCGCACAAACCAAGCCATCGGCGCCATGGCGATCTCCACCTGGAGCGCGCGCCTTCTCCTCACCCCTGCTTCCTCCCGCGCAACCCTATGCCCCCCTCGCCCTCCTGCAACAAACCCCCTCTCGTCGTCCTTCCCTCGCAACCGTCTCCACTTCGCGCGCCCGCGCCCGCCACGCGCCTACATCTCCGCGCCGGCGCCGGGCCCCGAGGCCGCCTACGCGCCGCCCTCCCTCGACGCCGCGGCGGCGGCAGCCGATGTCGCCGCCGCGATCTCATCCTCCGACGCCGTCACCTGGGCCGGCGTCTGGGC…
Seq_250958	Sobic.002G005800	Pid2	Oryza sativa Indica Group cultivar Digu B-lectin receptor kinase (Pid2) gene, complete cds.	Oryza sativa Indica Group	CCTGGCGAGCGGACCAACTGAGCTGACGCTCGTCCTCCCTCTCAACAAAACTCCCTGAATTGCAACGCATGTTACTCTCTCTCTCTCCACCCGTAAACAAACTCCAAGCAAGCCCATCCATCGCTCTTCCTCTGTCCCCGCCCCGACCGCAACGATCTGCTTTGCATCTTCCTCTTCCTCCATTTCCAGCCCCATGCGTAATCTTCTTTCGGAATTGAATCTCTCCGTCTCATGGCGCTATGAGCAAGTACAGCTCCAGATAAATCAATCCAACATATGACATATCCCTGCTCTACCAGAAATCCAATCTTTTTCCAGCCAAATCCGCCTCTTCCGGTGCTACCATAAAGTTTGGACTTTATTACGAGGCTTTCACGACGTGCGAGATTTCTGTTACCA…
Seq_251033	Sobic.008G060000	ER - Erecta	Arabidopsis thaliana ER (ERECTA) (ER) mRNA, complete cds.	Arabidopsis thaliana	GGGTGGGTCTCCCTCTCTGAAGCACACTTCTCATTCTCAACAAAACCCATGGAGGAAGCCATGGGCGAGCACACCCAGCACTCAAAATCCTAGAGAGGGAAAGAAGATCTCGTCTTTTCCTTCCTTCCCCCTGCTACTCGAGCTGGTGGAGGTCGGCTGGGATTGAGGAGGAGGGAAAGAGGCGAGGCGGTTAATCGAGCGGGAGGCCAAGAACTGGGGGATGACCATGGTGGAGAGGAGGTATGGTCCCTGTGCCAGCCATGGCTTCTTCCTCCTACGGCTGCTGCTCCCGTTCTTGTTCTTCTTCTCCTTTCTTGATGTGCCACCGGCTGTCGCCGCCGCCACACCCCTTCCAATAAACGCAGCACAAGGAGACATCATGCAGGCTATTGCGCGCCT…
Seq_251127	Sobic.002G348000	xa21	Oryza sativa Indica Group Xa21 gene for receptor kinase-like protein, complete cds, cultivar:II you 8220.	Oryza sativa	CTCTCTCTCTCTCTCTCTCTCTGCCCACAGGCCACAGCATGTGTGCCCAGATTCCCCTCTCTACTGAATCAGTCCCCTCTTCCCCTTCCCTCTCCTCAGTCCCTATCCGCTGCTGCTAACAGCAGAAGCTGCGGCACGGAGGTGCGCTCTCCCCGGCGGTAGTTTTGGGAGCTGCAGGGGGAAGAAGCGAGCTAGAGCTGCAAGAATGATAGGCGCCAACACCACCGCCGCCGTCTGCCCGTGCCCGGAGTACGCGGAGGTCGACCCCACCGGCCGGTACGGACGGTTCAGCGACGTTCTTGGCAAGGGCGCGTCCAAGATTGTGTACCGGGCGTTCGACGAGTACCAGGGGATGGAGGTGGCGTGGAACCAGGTGAAGCTGCACGACTTCCTGCAGAG…
Seq_251133	Sobic.010G050700	RFO1	Arabidopsis thaliana RFO1 (RESISTANCE TO FUSARIUM OXYSPORUM 1); kinase (RFO1) mRNA, complete cds.	Arabidopsis thaliana	GGGAGAGTTGTTACAGCAGTGCCGGTAAATAATCAATCATGTGATGTATCCGGGTTCAACCGTGCAAACTGGAATTAGTTGGTCCACTAAAATATATAACTTTATACATGTTCCTAAGTTCCTTGAAGGTGTTTGACATCATCATCAAGACAAGTGTCTGTTGGCAGCCAACTTCGGGAATATCGGGATGCTTGTCGATCGACAAGTCTGTAAGCTGAACTGGCGCTGCCTTCGATCAACGAAGTTGTAGGTAGGGTACTCTACCACCGAATTGTTCGGGAAAAAAGAAGCTCCACTACCGGAACGGCATTTGAAGCTTGATCGTTCTTCTTGGCAGCCTGTCAGTCGGTGCTGCTGATGCACCTGCAGCTGTGGCGCGTACAACACGGGTGAGAGCCA…
Seq_251180	Sobic.005G096600	RPG1	Hordeum vulgare subsp. vulgare RPG1 (Rpg1) gene, Rpg1-Swiss Hv 489 allele, complete cds.	Hordeum vulgare	ACATGCCGTAATAACAAAGTGCTCTGAAATTAACTTTGTTTCCATTAAAGTGAAATTAACTCAATTAATTCGTAGTTGTAAGCTTTTGCATTTCATCAGTAGAATCCCTTGGCACTATGCGAAGTAAGATAGAAATCATATGGACATTGGTCCCATATATCCACCCTGCAGTTCCGAAACTGCAAGTCAATTTATTCACCATTTCGCATGCCCAAGCAGCAGGCTCATGTCCATATACATGTATAAAACATCAGGTACGGCAACGTGCTTCACCGTAGAATTTTTCTCTCATCCCCTACTCTACATTCCAGTGAACAAAATTTCTGAACTTTGGAATAAAAAAAATTCCTGACAGAAACGCGTCTGGCCATTGACTTGTCAGATTGACCCGTGTCTTAC…
Seq_251235	Sobic.008G119700	RPG1	Solanum bulbocastanum putative disease resistant protein RGA2 gene, complete cds.	Solanum bulbocastanum	CACTACTATATGGGTTTTATTTTTTGTGGATGGTTGATCGCTATGTTGACTTCAGAGTTCCACCAACAATAACAAGACGACTGGGTCCAACGAGGCCGGCCGGCCACACATGACATGCACATGTATTTCCTGCAGAAAAAAGACTTGTAGATCGCTTCTCCTGCTATAGAAATCTACAACAATGGCAGATGCCATCATCTCCGCCATCATCGGTGATGTGGTCAGTAGAGCAGTTTCTCTTATCATTGGGCGTTTTAGTAATAACCAAGAGAGCACTGAAGACAAGCTGCAAAGGCTGAGGCATCTGCTCATCAGAATCCACAGCGTGGTAGAAGAAGCAAAAGGGCGACAGATCTCCAACCATGGCACCCTCCAGTGGCTCTCGGAGCTCATCGACGG…
Seq_251260	Sobic.009G174500	Cf-2	Lycopersicon pimpinellifolium leucine rich repeat protein Cf-2.1 gene, complete cds.	Solanum pimpinellifolium	CATCTCTGTCCTCTCTTTGTTCCCCTTCCGCCATAGCCCCATACTAGGTGGCGGCGCCGGGGGGAAAAAAAAAGGTGGCGGCGCCGGGGAGCAAACCGACTCCGAACAAGCGCAAGATGGAGCAACGGAGTTATGGAGGCACTCTACTCTGGTCTCTGGTCACCTTTACGCTGCCAACCGCCGCCAGGGAGGCGCCCAAGGGCCCCTCGCCGCCGCTGCTCACCTGCTCCCCATGGCCTATCGTGAGTTCGTGAACCCCTCGCAGCCGTAGGTTCCGTCGGGTGAGGTCAAGCTTCCAGAGGACTCCTGGACATACAGATTTCTTGGCAAGTCGTGGAACGATATCCATAGAAACTAGGTGGAGGCTGCAAGAAAATCATCACTTGGTCCTGCATTTCC…
Seq_251409	Sobic.005G154100	RFO1	Arabidopsis thaliana RFO1 (RESISTANCE TO FUSARIUM OXYSPORUM 1); kinase (RFO1) mRNA, complete cds.	Arabidopsis thaliana	GGAGGAGTGAGTCCTCAGACAGAGCAGCAAGGTTTGCTGGTCAAAGGCTGAGGAAGGGAGGAGGGGGAAAAGCTGCCCTGCTCGTCGTCGGCGCCACGACCCGGGCGGCGGCGAGTTTCGTCGTGAAATCAGCGGAGCGCCTATCGGCCGGCGGCGAGGTGCGCAGTCGGAGTCAGGTGCTTTCCATCGCACGCTATCAACTTTAGATCTTGATCGCGGGACCCAAATCATTGGCCAACTGGAGCAGAGTATCCAGAAAATAAGCTTATGAGTACAGATCTCATCCATGGGTTCAACGAGTCAAAAAATTAAAACTTTCACAGAAGATGAGATTAGAAGTATTACTAGCGATTATAGCACTCTTATTGGAAAAGGTGGTTTTGGAGAAGTCTATAGAGG…
Seq_251795	Sobic.003G068200	EFR	Arabidopsis thaliana EFR (EF-TU RECEPTOR); ATP binding / kinase/ protein serine/threonine kinase (EFR) mRNA, complete cds.	Arabidopsis thaliana	TTATCAAACACCTAGGAGTCGTTTTTTTTTTTTTGACAGCATCACCTAGGAGTCGTTGTTTACACTCACCACGTACCCACTACCAAAGCAGTCAACATGGCGCTGCGCTCGCTGAGCTTGCTACTCCTGCTGCTATCTTCCTCGGTCACCATCTCGGCACTCACCGCCGCCGCAGAAGGCGACGAGGAGGCCTCGCTGCTGGCCTTGAAGGCCGCTGCGATCAGCGGCGGGTACAATGACCCGCTTGCTTCGTGGAACCGCAGCACCACCGGTGGGTACTGCAGCTGGGAGGGGGTGAGGTGTCGGGGCGCACGCCGCCGAGTGGTGGCGGTGAGCCTGCCGTCCTATGGGCTCACCGGTGTCCTATCATCTGCCATTGGAAATCTATCTTCTTTGAGG…
Seq_252071	Sobic.003G154700	MLA10	Hordeum vulgare MLA10 (Mla10) mRNA, complete cds.	Hordeum vulgare	ATCGCATGTTGAAGGAAGTGCTTACAGACTGAATGACGAAGGAAGTGCTTAGAGACTGAATGACACAATGAGCAGACGCCTTGCACTGTTTGTGGTAAACCTTATAGGTGTAGCTTACCTCTTCGGCTCTACCTCAATCCTCACTGCATTAGTAGTTCTTCCCATCCACCTTTATAGTGATATATTGATGATCTAGGAGGAGCCCCTCAGCAGCCTTCCTCACAGCATCAACTGTTGCCATGGCGCCCGCATCATGCTTCTCAAACTCGAGGACCAAATGCTTCAGGCTCGACAGATGCTCTAAGCCAGACACGCCACTCATGTCATCGGCTCGGCCTTTCTCGAACCTCAGCTCAAGTGATTGTATCTTTGAAAGTACACGGGGCTCAAATGTCAGTG…
Seq_252085	Sobic.004G288900	RFO1	Arabidopsis thaliana RFO1 (RESISTANCE TO FUSARIUM OXYSPORUM 1); kinase (RFO1) mRNA, complete cds.	Arabidopsis thaliana	GCTCCAGCGTTTCTTCGTTCTGATCGTAGAGAAGCTAGCGGCGGCAAGCAAATGGAGGAGGGGGGCGTCGGAGAGCACGAGACGTGGGAGCCGATGTGGAGCGCACGGTGCAGCCCCGCCACCTCGTCGGCGGGCTCCCTGCAGGACGAGCTGAACGAGCGGAGCGCGGCGGCCGGGCACAGGGTGTTCGTCGCGGTGCCCGAAGAGGTCAGCGACGGGAGGAGCACCCTGCTGTGGACGCTGCACAATTTGGTCAAGGACGGATCCGAGGTTGTGATAGCTCATGTCCATTGTCCTGCGCCAGCGATCGCCCAGAAGAGGGGTCATACCAGCATGAAACCAGAAGAAATCAAGGAGTACAGAAAGCAGAAGCGAGCAAAGGCAGAGAAGAGCCTAGAT…
Seq_252215	Sobic.005G089500	Pid2	Oryza sativa Indica Group cultivar Digu B-lectin receptor kinase (Pid2) gene, complete cds.	Oryza sativa Indica Group	CTGATGGATGTGGCCTACCTCCCTGTCCTCATGCTCCTATTCTTGCTCTTGAGTACTCTCTCCGAATCCAACAACCAACTCACACAATCAAAGCCACTCTATCCTGGAGACATGCTTGTCTCCGAAGGCGGGATCTTCGCCCTTGGTTTCTTCTTCCCAACCAGCTCCAGTAAAAATTTATACATTGGAATTTGGTACCACAACATCCCCAAGCGCACCGTGGTGTGGGTCGCAAACCGTGACAACCCCATCACCACACCTTCTTCAGCGAAGCTCGCCATCAACAACAATCTAACACTCTCATTGTCCGACTCAAAAGGACACACTCATTGGGCAACCACAAGCAATGTCACCATGGGAGGCACTACAGCCTTCGCCAAACTGCTCGACTCGGGGAAC…
Seq_252254	Sobic.005G182400	Serk3A	Nicotiana benthamiana SERK3A (Serk3A) mRNA, complete cds.	Nicotiana benthamiana	GAAGTTCTCGTTATATGATTGCTGAAGTTTTTGTCTTTTTAAGCTAAATTTTGAATTCAAGGCTTTAAGTTTTACACACACACAACAGAGAATTTCAGAGTTATCCACTAATACAGAATGCAATTAAAATGTAGAACAGTCTATAGTCTTAATATACACATGGTCTGAGCTAGGTGTGGTCCTATCGTTGTATTAACAGCATATGGATGGAGTTACTTGTGCAAGCTATTACATCAGGACCTTATAGACTATTCCTAATAGTCAATATCTGTAGTGCGTACTCCTGAAATTTCCATATAGCCTTTCTACTTAAGGAACAAGTGAAAATCATGTCACTTTCTTATGACAGCTCATCTGCCAGTTGACAACTCAATGGCTTCCTGGATGTTTAGAGACTCT…
Seq_252536	Sobic.004G099700	ER - Erecta	Arabidopsis thaliana ER (ERECTA) (ER) mRNA, complete cds.	Arabidopsis thaliana	TAAAGGTCCATGAGTGCGGATAGTCTCGTGCCCTCTTGTTATAAGAATCTTCCTAGTAAGTTCACTCACCGTATAGTCTGAACGTCAAGAACACACACTTCATGGTGACAAAAATGGCTCACTCCTATCTTCTACTCCTCTTCCTACTACTGTTCATCACCTTCAACTCCAGCTTGCAACAATCCATGGCGCAGACTGACGCCAGCGAGCTAGCAACACTCCTAACAATCAAGAAAGACTGGGGCAACCCATCCGCGCTCAGCTCATGGAGTTCCCAGAACGCTTCTTCCTCCTGCAGATGGGCAGGGGTCAAAAGGTGCGTGAATGGCCAAGTGTCCGCCCTGTCCTTCCAAAACCTCAACATAATCAATCCAGTCCCAGCTTCCATTTGCAACCTCA…
Seq_252547	Sobic.010G165500	Lr34	Triticum aestivum chromosome 4 clone BAC ABCT5; BAC ABCT33 map 4A, *** SEQUENCING IN PROGRESS ***, 7 ordered pieces.	Triticum aestivum	GGCTAACCACCCCATTCCCCCGCGCGCCAGCCGCAGCAGCGCATATAAACGGCGCGCCCCTCTTCCACCTCCCGCTCACTCCTCTTCCTCTCACCCCCTCCCTCTCCCTTCCAGAAACACTACTCATGCGGCTCGACCGGCACCACCACCAACTGCCGCACTGACGTGCATGCGCAGAAGCACTAGTATCTCCAGCTAAGGAGCTCGTAGCTAGCTAGCTAGCTGCACGGCAACACCAGCCGTCCGTCTAGCCGACGCAGTACGTCCGACCAAGCAAAGCACGAGCGGCGTGACCACCCACCACCACCACCTGCCGGGTGCCGGCCGGCAGACAGACTCCCTCCTCCTATATGGAGAGCGCGATGGAGAAGGTGTGGGAGTCCGGGCGCCGGATGAGCC…
Seq_252615	Sobic.002G299000	RPG1	Hordeum vulgare subsp. vulgare RPG1 (Rpg1) gene, Rpg1-Swiss Hv 489 allele, complete cds.	Hordeum vulgare	CCCGCTGAGATGATGACCACCATCAACAGTAAAAGTTTCCAGCATTAGAGCATTATAAGCTGTGTATATATATAACACGGTCCTACCATAGCAATGGTTTCCATCCAACAAATTTTGTTACCAATAGTCACCATTCAACAGTAAAGCTTGGATTTATAGGAAACACAGTTCTATACTACATAATGTACAGATTGAGCTCTTTTTATTCTATAATACAAGTAATATGGTATACATATCACGTGTACATACAACTTCTACATCAGGGTTAGTATGTACAGTAAGAAAAGGCAATCCTCTCCAGCTATAACGAGCTTCCGTTGAAATATTTACTGAAAGCTTCCTCGTCCTTGCAGTGCACCCACAAGACCTTGTACACCTCAATTAGCAACTTCGGAAATC…
Seq_252668	Sobic.002G428900	Serk3B	Nicotiana benthamiana SERK3B (Serk3B) mRNA, complete cds.	Nicotiana benthamiana	CACCAACTTCCCGTGCCTCCTCGATGATTGGTCATATAGAAGAGCGATCTCGTCCTTTGGAGCAAAGCTTGGTAACCACCGAATGACAATCCGATTATCGGGATGTTAGGCCATCGGAGAGCCAAACGGACGCCCTCCAAACATGCTCTGGCCTCTGCTTCCTCAGCGTCCCTGCAATGAGAAATTACTCGCCATGCAGTTAGCTTTAGGGAACCCTCCCAGTCTCGAATCACCACTCCCACCGAGGTGTCTCCTGACAGTTGGTTGAAAGCAGCATCCACATTAATTTTTAGAGTCCCCTGAGGCGGCCCTCTCCATCGAACAGTCCCGTGAACAACTGAAACCTTTGCACTGGAACGCCCTGCAGGCTCCAAGGCACGCTTTCCTTTCAAATCTGCA…
Seq_252673	Sobic.006G148400	RFO1	Arabidopsis thaliana RFO1 (RESISTANCE TO FUSARIUM OXYSPORUM 1); kinase (RFO1) mRNA, complete cds.	Arabidopsis thaliana	TGTGCTCTTCCGATCTCATTGACACAAATACACCTTAAAACAGAAAGCAAATATAAGTGCTTCCTTTCTAAGTTTCTATCATGCAAAATTTACATGTAAGCCTGATCCCACATGTGCACGCTTACTCGCCTCGCGGGGCACATAGAACCTGCGTAAATGATCTGTCGAAATCTGCTCTGTGATCATGAGAGCGAATATGGTTTTTGGGAAGCACTTTTCGCACGGCTGCTCCCAACCTTCACGGTGGGTTGTCTTCCATCCAAGTTAGACGGTGATTTGTACCGTCATGTCGATCCATCACTAGCTGCTTCGAGCTTTTTCTCCACCGCTCATAGACGACTTTGTACCAACACCAATCACGACGTCTCTGTCTACAAATAAGCATGTTGCCGTTCGCTT…
Seq_252676	Sobic.004G076100	RFO1	Arabidopsis thaliana RFO1 (RESISTANCE TO FUSARIUM OXYSPORUM 1); kinase (RFO1) mRNA, complete cds.	Arabidopsis thaliana	TCCTCGTCCTCCTCCTCGGCGCCGCGATGCCGGCGCGCGCGCAGCAGGAGTACGAGGCCAACAAGCAGAACGCCTGCTACGCCACCAACGCCAGCTCCGTGCTCGGTTACACCTGCAACGCCACCACCGCCTCCACTCCGGCCTGCGACTCCTACCTCATCTTCCGCTCCTCCCCGGCCTACTACGACACGCCGGTCTCCATCTCCTACCTCCTCAACTCCTCCGTCTCCGCCACGGCCGCCGCCAACGCCGTCCCGACGGTGTCCCCGCTCGCGGCCTCCAGCCTCGTCCTGGTCCCCGTCCCCTGCGCCTGCACGCCCGGCGGCTACTACCAGCACAACTCCTCCTACACCATCCAGTTCCTCGGCGAGACCTACTTCATCATCGCCAACATCACCT…
Seq_252767	Sobic.008G148200	RFO1	Arabidopsis thaliana RFO1 (RESISTANCE TO FUSARIUM OXYSPORUM 1); kinase (RFO1) mRNA, complete cds.	Arabidopsis thaliana	GCTAGTTGTAGCAGCCACACTGATACTGCAGCGTAGTACTGCAACTGGTGGGTATGTGCAGAGTAGCCAAGTGAAGCCTGGGTGCCAGGACAAATGTGGCAACGTCAGCGTCCCCTACCCGTTTGGCATCGGAAATGGTTGCTTTCTGAATGAAGATTTTAATGTCACATGCAATAATGACACAGATAATGGAGTTATATTAAACACTTGTGGCACACCTCTACTGGAGATCAACCTGAGCCTTGGCGAGGCTCGTGTTCAGAGTCCCGTAGCAAAGTACTGCAACTCCACGAACATGGTGGTTAATGATAATAATGATTATTTCGTGCAGTTTAGTGTTGGCACCTCTTTCAAGATTTCCGACACCAAGAACAAATTCACATCAATTGGTTGTGCTAC…
Seq_252835	Sobic.005G175600	Pid2	Oryza sativa Indica Group cultivar Digu B-lectin receptor kinase (Pid2) gene, complete cds.	Oryza sativa Indica Group	TTTTTTTTTTTCAGCATAACGATGCTTAATAAAATTTATTGGGGAAGAGGAATAGATGTTCCGCTTAATATTTTCTCAGTACGATGTACATTGTTTACAGAAAGATTCCAGTGACTTTATTTCTTACAATACAATGCCTGGAGAGTATTAGTATAAATAAAGTGACCATACAACTTTGTAACTAAATACACACACATAGGCTATAAAAATGTACAAATAGTCAAATACACACATGCATACATACATGCATGGTCCTTTCCTTACATACCTACATAAATGACTTGCTCTGGTCTGTTATTTTCCAAACTTATCTTGGTTCAGGATCTGTTATCGATAGCTCATTCAGTGACATTACAGTCGACCTTTGAGCAGAGTCATTAATAAACCCTGGGTATTGGT…
Seq_252949	Sobic.003G059300	Ve2	Lycopersicon esculentum verticillium wilt disease resistance protein Ve2 (Ve2) gene, complete cds.	Solanum lycopersicum	GCCAGACGAATGAGTCCCGAGTTCTCAGCAGTCAGCATGATGGTCTCCATTACCGGCCACCGCCAGCAGCTCCTGCTGTACCTGCACTTGCTCGCTCACTTGTTCCTTGGGACCCAACAGCTCTCGCACTCCCTCGCCACCTACAGCAACCAAACTACCACACCAGCAGCAGCAGCCGTTCCGTGCCGGCCGGACCAGTCCTCGGCGCTGCTCCGGCTCCGGCGTTCCTTCTCCACCACCGACTCCACATGCCCCCTCGCGTCGTGGCGGGCCGGCACGGACTGCTGCCGCTGGGAGGGCGTCGCCTGCGCCGCTGCCGACGGCCGCGTCACCACCCTCGACCTCGCGGAATGCGAGCTGCAGAGCGCCGGCCTCCACCCGGCGCTCTTTGAGCTCACC…
Seq_252976	Sobic.005G156400	Cf-5	Lycopersicon esculentum disease resistance protein (Cf-5) gene, complete cds.	Solanum lycopersicum var. cerasiforme	GCAGGAATTCCTACGTTGTACAATGGAAAAGACCACACAGCAACTCCATTCCTCCAGCAACAGAAAACCAAAAACATTACAAGTATCTTTACTTGGTATTGCTCTTGTTCTGTTGCTCTTCTTGGCCTCTCCCGTCAGCTCTTGCAAAGAAGAGGAGAAGACCTCCCTCCTTGGGTTCCTCAATGATCTCTCTCAATTCTCTGCCCTCAACACTTCATGGAAAAATGACACAACTGCTGTTTATGGGAGGGCGTCACTTGCAACGTGGATGGGGCTGTTATGGATATTTCTCTGGCTTCTATGGGCCTTGAGGGGCACATATCACCCTCACTTGGCAATCTCACCGGCTTGTTGAGGCTCAACCTGTCCGGCAACTTACTCTCCGGTGAACTCCCACCG…
Seq_253154	Sobic.007G043750	ER - Erecta	Arabidopsis thaliana ER (ERECTA) (ER) mRNA, complete cds.	Arabidopsis thaliana	CGAGAGTGTATTGTTTGCCAGATTCAGTCTCTGCAGCAGTGGCGCGCCATAGATCCCTTACATTCAGTCATTACCACATTGTTTGAGGCACAAACACTGTTTGTCGGTACTCACATTTTGCATGTTCTCGCCTGACAGCTGAAACTAGGAACTGCGGAACAAAATGAAGCGCAAAACGAGTTTATGCTGCGGCCCTACATTAATACTGACAAGAAGGAAAAGACTAGTTGAACTGATTTGAATTGGTTGATGACACGCACTGCAGTACAGCAATTTAGAATTTTTGGTTTGTCACCATTTATACTGTAGTAGTAACACTGATTAACAGCATGATTAGTGCCATGTCTTGGCGGATGTATCTTCAATCTTCCTCCAACTACTGGCTCTGAACTCCTGTAA…
Seq_253252	Sobic.003G193200	Pid2	Oryza sativa Indica Group cultivar Digu B-lectin receptor kinase (Pid2) gene, complete cds.	Oryza sativa Indica Group	CCATTGACCCGTTGGAAACGCAGATGCCAAAAGAGCTCTATTATTGCACTTACGAAAGATTGGATCTGAAGAATGGCACCATCACACAGACACACCAATGGAAGCAGGGAGTAGCACTTGGACTCACCACCTCCTCCTGCTGTTCTTCCTCCCCATCCTCGCCGTCGCCACCAGCAGCAGCCATACCACCACCATCAACATCACCAACCGATGCTCCTACACCGTGTGGCCGGCTGCCACACCGGTGGGCGGCGGCGTGCAGCTGGACCCAGGCAACACCTGGGTGCTCCAAGTGCCCGGCGGCACTGGTGGCGGCCGCGTGTGGGCGCGCACCGGTTGTTCATTCGACGGCCCCGGCAACAAGTCCTGCCAGACGGGTGACTGTGGCGGCGTGCTGGC…
Seq_253304	Sobic.010G217400	Serk3A	Nicotiana benthamiana SERK3A (Serk3A) mRNA, complete cds.	Nicotiana benthamiana	GGCACCCCCCGAGTGCCCCCCGCCTCGTCACCCGGGCCCCGCCCAGGCGCTAGCGTGAGCCGACGCGCCCAATCATCCCATCCCATCCCCACCCCACGCAGCGCAGTAAACAAAACGAAACAAAGCCGCCATCCCCGTGCCGTGTCTCGGCCAACGCCCAGCGCCGAGGCAAGCGGGCCCACCTTTTTTACCCCACGTTGTTGCGTTGCGTGCTCCCCTCCTCCCCTGCTGGTGCCTGCTAGGCAGCCAGCCGCGCGCTACTTGCCTTGCCAGTTGCGTCGCTGCTCGTCCCAGTCCCATACCACACCACCCCAACCATCTCCTCTGTCTCTGCCCCCGTCTCCGCCTCGTCGCTTCCGTCCACTCCTCCACCCCTGCCTGCCTCACGCCCCCATTGCT…
Seq_253341	Sobic.004G044700	Serk3A	Nicotiana benthamiana SERK3A (Serk3A) mRNA, complete cds.	Nicotiana benthamiana	ATAAGCTTTGAATTCTTTGTCAAGGAGGATGTTGCTGGATTTGATGTCACGGTGGACAATGTGAGGCTTGCAGACATTATGGATATAAGAAAGGCCACGGCTCGCTCCTTGCGCAATCCTGAGCCTCATCAGCCAGTCAAGAGATGTGCTGGTATCATCATCACTGTTGTGAAGCCAATCGTCTAGACTGCCATTTTCCATCAAGGAATATATTAGGAACCTCGAGTTCCCCTGGATGCAGTAGCCCCACAGCGGCACTAGATTTTCATGCTGTGCCATGGACAACGCATCAACTTCTGCAGTAAATTCCCTTTCCATGAGGCACATCTCACCGTTAAGCTTCTTGATGGCGAGCTTGGACCCATCAGGTAGCTCAGCCTTGTATACTAGTCCATAGCC…
Seq_253666	Sobic.003G291600	PEPR1	Arabidopsis thaliana PEPR1 (PEP1 RECEPTOR 1); ATP binding / kinase/ protein binding / protein serine/threonine kinase (PEPR1) mRNA, complete cds.	Arabidopsis thaliana	AACTCAGGAAAAGTAAAAAAATCACATTCGAATCCTTAGCTCTCGGGATCACGTGTCACTCACCAGATGGAAGGGACACGTCGTTATATCTCTATCTTCTTCTATTAATCGTACTAATTTCTGAATGCATGTGCAGAACACCAGCATTTGTTTCAGAAAGAAATTGTAATCGTAACCTTTGCTATTTGTTCTGTTTTAGTGGTCTAATGTGTGCGCTTAAAACAAATTTACAGTGTCCAAACACAAATTTAGAGTCAAGACGTCTGGTGACAAGTTTTGGAAGCATGACTTCCCTGCTGTACTCCACTGAAATGTAGTATGAAGCATCACTATAGCTGTTCATTAACGCTGTCCTAACTTACTCACTGGTATGTGCGGTGGTCGGTTCCTTTCTTCAGA…
Seq_253747	Sobic.002G175550	Serk3A	Nicotiana benthamiana SERK3A (Serk3A) mRNA, complete cds.	Nicotiana benthamiana	TATTTTTGTAACATCCATATGAAATACCTGCAGCATGCATACGAAACGCCTGGAACACTTGCAAAATGCATTAGGGTCTTAAAACATCCACTCAGTGACAATTTTAAAGGGGATTATCTCATACTGCGAAATGCAACAGCGGTGGAAGCGGCCGATATGTTCGGAACACTCTGGACGCAGGAGTTGGGGAGGCTGCCTGAGCCGGTCCGCAGGTCCATTAAGCGGTGGCCGGATACCTGGGTGTAAGCATTTCCGATATATATACGGCTATGTATGTATTCTTTGCATCTACGGATTTGCATAAGAAAAAAATAAAGACAATACAGCAGCCGTTTCATACACCCTGTTTCATTCTTCTGCTAGCATTCTAGCAGGCAAAGTGGAAACCTCGGAAGTGTG…
Seq_253777	Sobic.005G076500	Pi36	Oryza sativa (indica cultivar-group) CC-NBS-LRR Pi36 (Pi36) gene, complete cds.	Oryza sativa Indica Group	GTGGATTGGGCAAGACCACTCTGGCCAAAGCAGTGTATGAGAAACTTAAAATAGGTTTTGGCTGTGGGGCCTTTGTTCCTGTTGGCCGGAATCCTGACATTAAGAAAGTTTTCAAGGACATTCTCATTGATCTTGACAAGCAACACTACACAACATGTTTCAATATGATGATACTAGATGAAAGGCAACTCATTGATGAGCTTCGAGGATTTCTCAAGAACAAAAGGTACTTCATTGTTATTGATGACATATGGGAGACACAATCTTGGGAAACAATCAAGCTGGCTCTGATTGAGAACAATTGTGGAAGTAGAATAGTTATAACTACTCGTAAATTCAGAGTTGCCACGGAAGTCGGTGAAGTTTATAATATAAACCCGCTTTCAGATGATGAATCTA…
Seq_253778	Sobic.002G081800	MLA10	Hordeum vulgare MLA10 (Mla10) mRNA, complete cds.	Hordeum vulgare	CTGACTGCCACTGTCACCGCGAGGCAGGGAAGCCACATATCAGATCGGCCACCACCGGCATCTGCTTAGGACACGGCGAGCGATCCACCGACGAGATGGCTCCACACCCACAGCACGGCGGCTAGCTAGGCTTCCAACTTCCAAGTAGAAGGTGCCGTCAGGTGAGGGGTTCGATCCAGTCTGTTCTCCTGTCCTGGGTGCGAAATGACGGCGTTCGAGCGAGGCGGCACTGGTGACTTCCCTTGATCCATTAGCCAATTATGTGAGATAATGCTCCGATCCCTGGTTTTTCTTTTCCGAGTCTGTCGGATTATTATATATGGGGTTATTTGGATAACTTGGGTGGCTCCTTAAGCTAACTGCCGAACCACCAAAAGCCAATCCGAACAAGCTGGTGCC…
Seq_253851	Sobic.007G105500	EFR	Arabidopsis thaliana EFR (EF-TU RECEPTOR); ATP binding / kinase/ protein serine/threonine kinase (EFR) mRNA, complete cds.	Arabidopsis thaliana	GGGCATTTCACTCCATTCAAAATTTTTCGATGTAATATAAATAATCACTACATTTTATTCAGCCATATGCACAAAAAAGACGGTACATTTACAGAACTTTATCCTATTGATGTATTATTCACTTAACCTAACCAAAAGAATGCCTCAAGTACACAACGACCTCTAGTGCAATCAGGTTGAAAATCCTGCCTGCCCATGAAACCTCTTTTATTACTATGTACATGCTCAACAACGTTCTTTCAACGCGGGGCGCTGGGGTTGGTGTTCGTAAAGCCTGCCCTTAAAATGTGTCAACAATCTGAGCATGAGTATCCTCCTCAGGCTTGACTGTTAGTTCAGGTTCCTTCCGAGTTAGTTTCAGTGGAACATCAAGCTCCGGGGGCTCCATGCAACGGATGA…
Seq_253858	Sobic.010G008500	Pikm2-TS	Oryza sativa Japonica Group Pikm2-TS mRNA for NBS-LRR class disease resistance protein, complete cds.	Oryza sativa Japonica Group	TTGTGAGAAGTGAGAACCAACGTGGTGGAGAATGGAATCTGTTGAGGGCAATGTTGTGTGGCTTCTGGGCGAGGAGTACCAGCTGCTCTCCGGCGTTGGCGGCGAGGTCGCCGAGCTACGCGACGACTTGGACACCATGAAGGCGCTGCTCCGCATGCAGTCGGAGGCCGAGGACGGCGCTGTGGACCACTTCGTCCGCGTGTGGATGAAGCAGCTCCGTGAGCTCGCCTACGACTCCGAGGACTGCATCGACATGTATAGGCTCCGCATTAAGTCCAGGCCCAACGACGGCGTCCGAGCCAGGCTGCAACGCCTGCTTGGGACGCTCTTGCCACGGCGTCGCCTCGCGTGTGAGATCCGCGCCCTCCGCGCCCGCGCCACCGCCATCAGCGAGCGCCA…
Seq_253973	Sobic.006G239900	RPG1	Arabidopsis thaliana rpp27 gene, exons 1-6.	Arabidopsis thaliana	CACGAACTCCAGCAGCGCGTTCTGCAACCACGCACATCGATCACTTCTCGTTCATCGTAGGGTCGCTTCCATAGGATTTGGTGATTAGGAAGACAAAAGCTTGAATGCATGCTTTGAGAATTGAGATGAGTTTCTTCTGCCGCCGCCGTTTTGAGGTGAGATTCATCTCTAGTGACCTGTGGCTATGGCTGTGCGTGCTCCTGCTCGTGTCTCGCGTGTCCAATGGCTGCTCCACGGAGGAGAGGACCGCGCTGCTGGAAATCAGAGTCTCGCTGCTTGGCACGACAGACTCCATCGCTGGGTTGCCCCTGTCGTGGTGGTCAGAGAGTGCAGCAACGAGTGCTTGGCACGACTGCTGCTCCTGGAAGGGCGTCGAGTGCAGCAACGACACGGGACGCG…
Seq_254016	Sobic.006G176800	RPG1	Hordeum vulgare subsp. vulgare RPG1 (Rpg1) gene, Rpg1-Swiss Hv 489 allele, complete cds.	Hordeum vulgare	GTGAAAACAGCACTACAGCAGCGCCCAAGCGACGGAGCGAGAGAGCACAGCAGCGCAACGGTGGCCGGCCGCAGGAGCTCGGAGCCGCAGAAGATCACGCCACCGCCGTCGCCTCCTTTCTTCCCTCCGGGGGCTGCTGCTCTCGCTGCTGCTCCTCTCGCAGCTTGTTTGGAGCCGCTTCTTAACGGCTTTTTACGGGAGAAAAGGCGGACGAACTCTCCCACGGCCCACCTGTCCCGCCCGCGATTCTTCTCCCCGCGGTGTTTCAGCGTGGAAGCTGAATCGGCAGGCGTCCAGGCGAGGCGCAGTGGGGAAAATCCCACCGATTCGCTCGGCCCTCGTCCGTCCGCTCGCTCGAGAGGCACCGGCGCCGCCGACTCCGGGCTCCTCCTCCCCGCG…
Seq_254034	Sobic.001G543800	RFO1	Arabidopsis thaliana RFO1 (RESISTANCE TO FUSARIUM OXYSPORUM 1); kinase (RFO1) mRNA, complete cds.	Arabidopsis thaliana	CGAGAGGTAATTCTGACCCACAAATACTCCATCTGGAAAACCATTTCAAGCTCTGTCAATTTTTGTACAGAAGAAATCACTTCCACACACCATCACCGTTACAAAGGGGAGTCAGAATCAAAAGAAGTCACTTGAGATGACTAACCAAATCCTCTACTCAGACAGTATGCCCCACACTACAAACTTAACTACTACATATTCACCACACACACAACCAGGTTAACTTGGCCTTTGCCACACGATATATCACAACAAAGTATCATCACATTAACACTATACGCTGCTATCTCTACAACAACTGATAACAGCAAATATCAATCGACCAATCAATCCTTCATCACCCTGAACTAGCGTGCCACCAAGTTTTAACAGTGGATGATGATATGATCAGGCCAAACC…
Seq_254116	Sobic.002G027700	ER - Erecta	Arabidopsis thaliana ER (ERECTA) (ER) mRNA, complete cds.	Arabidopsis thaliana	TCGCTTCAAAATATTCAAAACATGCTCTTTATGCACAATTTTCTTTTTGTCATGTTGGAACAGAGATGAACGCATCAGACAGGAACAAATTATACACACACAAGCGACGACGTGATATCACGCGTGGGGAAAGAATCAAGAATGCCGCCCTTCTCGTAAGATCAGCTAAAGAACCGGGGAATGTCCTCCTACACTACACAACAACGGCGTCCTCGTCGAGGACCGCCGCCACCGGCTCCGGCGCGGTGTCCGTCGGCACGGCTCTCTTGAACGAGAACGACGCCTCGCCTCCGCTACCGTGCGACCGCAGCGAATGCCGCCGGTCCAGCGCCGTCGCCGACGCTGACGCCGCGGCGGCGTCCAGGCTCTGCACCCGGCCGTTGTTCCCCTGGAACACGG…
Seq_254346	Sobic.001G237000	Serk3A	Nicotiana benthamiana SERK3A (Serk3A) mRNA, complete cds.	Nicotiana benthamiana	CCAAATAACAACAAAAGTGCTATAGGAATATTTCCCCCGAATATTTCGGATCTGAACACAGCCCATATTAGTTTTGTGATGTTAAACATGTTACCTGTCGTTAAAACTTTTCTCTCTCCCTCTCTCATAATTGATACTATAGAGATAAAAAAACAGAAGAACACATAGACATAAAGTTAGTGAACTACGGAGTATTATCTATTCTCAAGATATTAGTAATTACTACTAGTAATTACAATATAGAACTCTGACGCACATATATTTTGGGTGAGATTTACGAGTTTGGTAAATGAAGCTTATTCTTTCTCTCTCTTCTAAAAATATGATGTCACATCATCAAAAAGGTCTACGTGATAGCTTATTTAGTGCTGATAAAACTGAGATGAAACTCTAGACTGG…
Seq_254637	Sobic.003G027500	RFO1	Arabidopsis thaliana RFO1 (RESISTANCE TO FUSARIUM OXYSPORUM 1); kinase (RFO1) mRNA, complete cds.	Arabidopsis thaliana	CTCTGCATATGCTTTTCCTTTTGCCATTTTATCTTTCTTTTTTGAAACATTCATTTTATCTTTCACCTCAGCGAGTGAGGGGCACATGCTATGGTATCATGAGAATAACCTGCAGGTAAATTTAACAAGGGAGGAGGAAAAAAATGCAAAAGCATAACCATGTACAGCTACTGTAAGATCTATATTGCAGATCAGCAGATACACAGCTACGAGCATCCCTACAACACTGGTTCCTTGAATCAAGGATCCTCAACAGGTCTAAACTACTGAGCATACCCAACCTGACAAAAACTACGGCTGCAACGATGCTATAACTGTAAGAGCCTTGGTTACTCAGTGCTATGCATCGGTTTAAGTTTCTGAATCCACTGCATGAGCCGCTTCTTGGGGTCCTGGCAG…
Seq_254685	Sobic.009G181300	Pid2	Oryza sativa Indica Group cultivar Digu B-lectin receptor kinase (Pid2) gene, complete cds.	Oryza sativa Indica Group	CTTCCACTCAAAAAAAATTATAACCATCGTGCTAGCTGAATCTGGCATGTCACAGCTGATCTTCTACAAACGTCTGACAAAAATTCCGATGAAAAGTTCCAGAAGCACTTTCCATAGGACAAATTCGAATACAAACTCTACTCCGAAATCAAAACGAGGAGAAAAATTCGAACACTAAGAATCATTGTTGTCCATTGATTGATCGGGCGGGTCCTTTGTTGACTCATATAGCATCAACGGGGCTGCAACTCAGACATGGAAGCTTCGTTGATAGATGGCTCCCGAGCTGCCGCCATGGGACCCTTGCGACCCATGCTCATCCCCCGCGGCGGGTTCACTCCTGTGGCCGTGCGGCCATGAAGCACGTAGGCCGGCACGGCGGGCGTCGGCAGCGTGATG…
Seq_254688	Sobic.009G181200	Pid2	Oryza sativa Indica Group cultivar Digu B-lectin receptor kinase (Pid2) gene, complete cds.	Oryza sativa Indica Group	CTTCCTTACTATTGAATTTTGATACGACATTTCCAGAAAGACACCCAAAGTGCTTTGAACAGTTCATGTTGAAAAGTAAATATTCCTGTAATTCAGAACCAAACCTACTTAAAATAACAAACAAACAAGAGAACAGTCAGAGAACTGAAAACCAAAAAACGTGAACCAGAAACATCCAAGTTCATTGATCCATCGACGTCGTCCATGCTGATGTTGCTGACGACCCATCAACGCGGCTCCAAGTCAGTAAGAGAGGCTTCATTGATGGACATGGACTCTCCCCGACCTGCTGCCACCACCCTTTCACCCTGGCGATCGTCCGTCCCCGTCACGAGTACCCCGTCCGCTGTCACCGTGATACCACGGCCCGGCATTGCGAAGGCTGGCACGGCGGGCGCC…
Seq_254784	Sobic.006G146500	RPG1	Arabidopsis thaliana RPS2 (RESISTANT TO P. SYRINGAE 2) (RPS2) mRNA, complete cds.	Arabidopsis thaliana	ATTAGGCTTAAAAGATTCGTCTCGGAAAGTAGTCGCAATCTGTATAATTAATTAGTTTTTTATCTATATTTAATACTCCATATATATGTCTAAACATTCGATATGATAGGGTATAAACTTTTGGGGAGGAACTAAACAAACACAGATTGCCTTGTAAAAACAATTCGTCGCATATACAGATTTCGATCCGCTTATTCGTGCCAGCATTGAACGAAGCTTCCTGCCAATGACACAGCAACCGCTGAGAAAAGGGATTCTGTCATATTGGAATGAAGAACTTGCTCTCCTTGCCCTCCTTGTCCTCCCACTCCAGTTTCTCCCACCAGTCAACTGAACCGCACACCTGCTTCAGTTTCCCACAATTGTACGTGCTGCTCAGTGGGATGCTTCTCAGATTCG…
Seq_254854	Sobic.001G094000	ER - Erecta	Arabidopsis thaliana ER (ERECTA) (ER) mRNA, complete cds.	Arabidopsis thaliana	GCGCTCCTCTCTTTTTTTTTCTTTTTACAAACAAAAACTTTTTATTCCACCTCCATCCTTGTCTCTCTCCTTCCCGTTCCCCCCTTTCTCTCGCCCGTACGAAACCCTAGGCTCCGCCGGCCAAAACCTCGCCGCCGCGCCGCCGTCCGGCGGCGCCCCATGGCCCCGGCCTTCTCCGTCCCTGACGCAGAAGACCTCCCGGCCCGCAGATCCGACGCCTCCGACGTCGCAGGCAACGTCTGGGACCTCGCGACCCTCCCCACGCCCCCCGCCGGCGGCGGCCGCGAGATATACATCTACCGCAACACGTTCAACCTCGTCCCGCGCTCCATCGGCGGCGGAGCCGGCGGCCTCAGGTCGCTCAAGTTCTTCGGCAACGATGTGGAGGTGCTACCCGCG…
Seq_254875	Sobic.006G229800	Pid2	Oryza sativa Indica Group cultivar Digu B-lectin receptor kinase (Pid2) gene, complete cds.	Oryza sativa Indica Group	GAAAGCACCAAAATTGTGAGCGATATATAACGCTGTCCAGTGAGATCAGCAGCTTTATTGCACAAAGGGGGTCAGAGATTCTAGCATCATCTATCATGGAGTCACCAGCCAGCAGATTTCTCAAACTTTCCGCCATGATTTTCCCCGTGCTCTTGCTTTTTCTCAGAGCGTCGGCGGCAGGCATCGCATCTGACACGCTCAACAACGGTGGCAACATCACCGACGGCGAGACGTTGATCTCATCCGGCAGCTCCTTCACCCTGGGCTTCTTCTCCCCGGCCGGCGTGCCAGCCAAGAGATACCTTGGCATCTGGTTCACGGCGTCCCCGGATGCCGTCTGTTGGGTGGCCAACCGTGACACCCCCATCAGCAACACCTCAGGAGTAGGAGTACTGGTGG…
Seq_254994	Sobic.007G089500	Pid2	Oryza sativa Indica Group cultivar Digu B-lectin receptor kinase (Pid2) gene, complete cds.	Oryza sativa Indica Group	GCTGGTGTACGAGTACCTCCCCAACCGCAGCCTCGACGCCTTCCTCTTCGATCCGAGCAAGAGCGCGCAGCTTGGGTGGAGCACCCGGCACAACGTCATCGTGGGCATCGCCCGCGGCCTGCTGTACCTCCACGAGGAGTCCCGGCTGCGGATCATCCACCGGGACCTCAAGCCCAGCAACGTCCTGCTGGCTTCCGACATGACTCCCAAGATCTCGGATTTCGGACTGGCCAGAGCGTTCTGGGGAGACGAGTCCAGAGAGGTGACCAGACGGCCTGTTGGAACCCTCGGGTACATGGCCCCAGAGTATGCTTACTGGGGGCATGTCTCCTCCAAGTCAGACATGTTCAGCTTCGGTGTTATAGTCCTGGAGATGGTAACCGGACGAAGAAACAACAG…
Seq_255035	Sobic.006G219801	XA1	Oryza sativa mRNA for XA1, complete cds.	Oryza sativa	AGTTAGTCAGAATGTGGATTTCGCAAGGATATGTGCATGGTAACCATACTGGTAAAAAACTAGAGGATATGGGGAATGCTTATTTGGCTGATTTAGTGAACTCAGGCTTCTTGGTGAACTTAGGTTTCTTTAAGTTGGTTGGAAGGGGCAGGAATTACTCGAATCACTTTGTCATGCACGATCTTATGCATGATTTAGCATGGGAGGTTTCAAGAACTGACTTTGTAACTATCGATGGCACAAAACATAAAGAAATCTTGCCAACTACGCGCCATCTGTCAATATTCACTGGCTTTTCTGCAGACTATGAGCCTAAATTTTCTTGTGACAATCTAGAGAAAAACTTGCTGCAACTTACATCTGTGAGAAAGCTGAGATCCTTGATTTTAATTGGTGGTT…
Seq_255430	Sobic.006G055000	Pid2	Oryza sativa Indica Group cultivar Digu B-lectin receptor kinase (Pid2) gene, complete cds.	Oryza sativa Indica Group	GAATTTTTTCTAGACATAGAATTGGAAAAGAGAAAGATGTGGCTCTAAACGTTGAAGACAACATGAACCTACTGTACTATAGACCTAGTTAATTTAGGGGGAAATGAACTAAGCTAGTGACTCACCGAACATCATTGGCTATCACTTGCGCCTGAACTTGCAGATTTGGACAGTAATGTCCGATGCTGGAAAGGAACTGGAAACTGAATATAAGTGTCGTGGGCCGAGTACGAGAGCCCAGCTCAATGAATTACAAGTGGGCCATCTTGTGGGCTTGCCAGGCCATCGAGACCTTCAAGACCCCGGCGGCAGCTGCAGGTCCGCCATGGATGTCTTCTCCAGCATCTCCACGACCCTGCTCATCGTCGGCCGATCCTGCGGCGAGAGGCGGATGCACCA…
Seq_255519	Sobic.002G175700	EFR	Arabidopsis thaliana EFR (EF-TU RECEPTOR); ATP binding / kinase/ protein serine/threonine kinase (EFR) mRNA, complete cds.	Arabidopsis thaliana	GCCCAGCTCCACTCCCGCGGCGTCGCGCACCTCGACGTGAAGCCCGACAACCTCCTCGCCAACGCCCGTGGGGAGATCAAGATCAGCGACTTCAACCTCTCCAGGATCCTCTACGGCGGCTCCGGCGAGCGCCTCCAGGTCCCCATCACCGGCGGCACGATGGTCCACTTCAGCCCCGAGAGGTTCGCGCCCAGAGCCCACGCCGGGCCGCACGGCGCCATGGCGGCCGATGTCTGGGGCCTCGGCGTCACCGTCCTGGAGCTCTTCTTGGGGCGAAGACCCCTCCTGCCCAGAGTAGAGAAGGCGTCTGCTGAGGAGATCAAGCAGGCGATCTGCGACGGTGAGCCTCCGTCCGTGCCGGAGGATGCAGAGGCGTCGGCAGAGCTGCGCGGGTTCGTT…
Seq_255534	Sobic.005G001100	Serk3B	Nicotiana benthamiana SERK3B (Serk3B) mRNA, complete cds.	Nicotiana benthamiana	ATTTCAGCTCAGGAAGTGTCTAAGCCCCCTACTAGACTGCCTTCTCCATTTTCTTCTGGATTTTCATCTCAGGATGGACCTAATACCTCTTCTAGGTTCCCTTCTGCATTTTCTTCTGGACTTCCATCACAGGATGGCCCTAATCCCCCTTCTAGATTTCCTTCTTCATTTTCTTCTGGATTTTCATCACAGGATGGGTCTAATCAGTCATATGGCTCAACATACCAAGACAATCTTCTCCGGGATACTGTTTTGGGTGGCAACAGTAATCATTACCAATCTCAGTTTGGAAGGCACGCAAGTGATATGGAGTTTGATGATCCTGCTATATTGGCTGTGGGCAAAGGGCTGATGCCTGGAATTGGCGATTCCGGGCTGGAGATGAAAAATTCTCCTGCT…
Seq_255581	Sobic.003G263300	Pid2	Oryza sativa Indica Group cultivar Digu B-lectin receptor kinase (Pid2) gene, complete cds.	Oryza sativa Indica Group	ATTGCTGTTTTCCTTTTTGACCCGCATCGATCCGAGGTCGGGCCGCTCTCGCAGAAACAGGTGAACGCCAAGCCGGCGGCGTGCGTCTCGTCGCGCTGGTAGCCGCACCATCCGCCGGAGCCCTCGCATCGGTCGCACTGGTGGTTGTGGGTGTCGTAGTTCAGCTCGAACCCGCCCTGCAGCACCTCACGGAACGATCCGTTCCCCGGAGGCGGACCGTCAGGCGCGCCCACGATTGCCTTCTTGTGTACATCCAGCACCGGCGCCACCACCACCTCCTCGCACTCGAACTCGTACGCCTCAGCGCCCGTGATCACACCGTCCCGCAGCACGTACGACCGATTGCCGTCTTGTTGTGGTTGGCCGCACCCACTCAGCTCCACGGCAGATGACAGGGTA…
Seq_255640	Sobic.003G096400	Pid2	Oryza sativa Indica Group cultivar Digu B-lectin receptor kinase (Pid2) gene, complete cds.	Oryza sativa Indica Group	ACGACCTCTTGTTTCGTAGACCACAATAATATCCAAGAAATGCAGCCAGCAGGAATTCCTTGCTACCGTGCAGCTATCATGACAACTGACAGATTCAGGAAACACACACACACACACACATGACAACTGACAAGCACAGGATCGGTCCTCCTGAGAGGTTAAAGCAAATAGGCGCTCATTCTGAAGCACTTGCAACACCTTCTCTTCGCCCACCTTCGTCTCCGAATACCCATGAACTCGCATAAATTTCTTCTGGCAGTGCTGCTGCTTTTGTTTCTCAATTATGCATCCTATGCTGCCACATCATGGGAAGATGATGACTTCCTCAAAACTTGTTCATCGCATCGATGCCACAAACATGGACCAGAGATCCGGTTTCCGTTTCGGCTTCCAAGCCAC…
Seq_255689	Sobic.006G244000	RFO1	Arabidopsis thaliana RFO1 (RESISTANCE TO FUSARIUM OXYSPORUM 1); kinase (RFO1) mRNA, complete cds.	Arabidopsis thaliana	CTTGGACGCCGGAGGAGATACTGAGCTACCAATACGGCCCATCTTCCTCTTGTAGGCTGTAAGCAGCAGTCACCTCTCAGTCACACACATGGTGGGTATGAGAGGTGCCTACGGTGGTGGTGGTGGTGCTTACAATGACAGCAAGAGCGGCCGGCCGCATGGAGGCATGGCGGCGGCGGCTCCGGTGACGACAGAGCAGGAGATTGCGGCGATGGCAGTGCACAAGGTGGCGCCACCGCCGGCACGGAGCACGGCGAGCAAGATGAAGGCGAGGGTGAAGGAGACCTTCTTCCCCGACGACCCGTTCCGAGCGTTCAAGGGGCAGCCGCTGGGGACGCAGTGGCTCATGGCGGTCCGGTACCTCTTCCCCATCCTCGACTGGGTGCCGAGCTACTCCTT…
Seq_255730	Sobic.007G054000	Pm3	Triticum aestivum powdery mildew resistance protein PM3b (Pm3) gene, Pm3-b allele, complete cds.	Triticum aestivum	TCCATATCCGCTTTGCCCACTTCCACTCATTCGTTCATCCACATCCACTTTGCCCACTTCTCCTGCTACAGTGCGCTTTGTTCTGAGGAACACGTTCCTGAGAGGTGCGAGTGCAGCAATGGCTGAATTGGTAACCAGTATGGTCATCGGGCCGCTGGTCTCCATGGTGAAGGACAAGGTGTCCAGCTACCTTCTTGACGAGTACAAGGTGATGGAAGGTATGGAGGAGCAGCGCGAGATCTTGGAGCGCAAGCTACCGGCCATCCTGGACATCATTGAAGATGCAGAGGAGAAGGGTGCGTACCGGGCAGGAGTAAGAGCCTGGCTCAAAGCGCTCAGGAAGGTATCCTATGAAGCAAATGATGTCTTCGATGAGTTCAAGTATGAGGCACTTGCGCG…
Seq_255757	Sobic.005G228250	Pit	Oryza sativa Japonica Group Pit mRNA for NBS-LRR disease resistance protein, complete cds.	Oryza sativa Japonica Group	AGAACGTTTCGTCCATCACCACATGTTTGTTCGTTATAAAAATCCAAGACGGAACCTCGATTATTTTACAAATACTCAAGCAAAAGAATATGAAAACACTAGTGGCGAAGTTTGAACACAAGGACTATATTCAGCACTCTGCTTCACCATATATAATTCCAAGCATCCTCCAGCCCAAGGCAATCTGTTGTACTTGTACGGACTCATGTGTTTCTCAATAGAAATGGTTTTTGGCCAAAACAAGAGCAAGTAGATGGTACACAGCTGAAATCTGCGTGCTGGAGATCATGAGTTCCCACCGATCCGATTCCATTCTCACTCCCATAGCGAAGATGGTTTATCGATACCTGGATAAATATATACTCGCTTTATTTATGATCTGGCGGTGCAGCAATTAAT…
Seq_255811	Sobic.004G087700	Lr34	Triticum aestivum chromosome 4 clone BAC ABCT5; BAC ABCT33 map 4A, *** SEQUENCING IN PROGRESS ***, 7 ordered pieces.	Triticum aestivum	TTTTTTTTGGACAAAAGGTATAAATTTAATGGGAAATCTTTACATTGAAGTATTGAACTCAGCTGTGCACAGTCTACATACAATTTACACAGAGGACCCTTTCTGTTCAATACAGGACAAACTGGTCGGAAAACAAAAATGAAGTCAAACTTCCTAGAAAGAAACAAAGACTACATATATATACTCTCTCATCATTTTACATTGCTGCATTGCCTATATACTGAAAGTGAGCTGAAGCAACACCGAATCCTTTTTAGATGGCGCTCTCCCTTATCTTCTCTGGAAATTGAAGACTTTGATGGAGAAGGCAAAGACGAAAGCAAAGAGAACAGTGAATCCAACAACAGCAGTAGCTACATAACCCAAGTTGTCATGCTCGAATCCAAAGAATCTGTTGAC…
Seq_255812	Sobic.004G087700	Lr34	Triticum aestivum chromosome 4 clone BAC ABCT5; BAC ABCT33 map 4A, *** SEQUENCING IN PROGRESS ***, 7 ordered pieces.	Triticum aestivum	TTTTTTTTGGACAAAAGGTATAAATTTAATGGGAAATCTTTACATTGAAGTATTGAACTCAGCTGTGCACAGTCTACATACAATTTACACAGAGGACCCTTTCTGTTCAATACAGGACAAACTGGTCGGAAAACAAAAATGAAGTCAAACTTCCTAGAAAGAAACAAAGACTACATATATATACTCTCTCATCATTTTACATTGCTGCATTGCCTATATACTGAAAGTGAGCTGAAGCAACACCGAATCCTTTTTAGATGGCGCTCTCCCTTATCTTCTCTGGAAATTGAAGACTTTGATGGAGAAGGCAAAGACGAAAGCAAAGAGAACAGTGAATCCAACAACAGCAGTAGCTACATAACCCAAGTTGTCATGCTCGAATCCAAAGAATCTGTTGAC…
Seq_255894	Sobic.004G032400	RPG1	Solanum bulbocastanum putative disease resistant protein RGA2 gene, complete cds.	Solanum bulbocastanum	GGAGGCACATGCTCTAATCCGCATATTGCTATAATCCTGAAGGGAGAACCACAGGAGGTTTAGTGCTAGCAAACCTTTTGGTATGAAGCTCATGTTTACTCAAACCTATCCTATTAGACCTGTAGTGTTTATGTTAAACTGTACAATATAATTAGAAGAGTAAAGTCCATCACCAGTCCCTAAACTTGTTTGACTGTGTCATTCCGGTCCCTAAACTCGCAAATCTTCAGCTGTGTCATCCCGGTCCCTGAACTTGGAAATCACCCATTTAGGTCCTCAAACTTGTTCAATTGTGTCACCCCGGTCCCTAAACTTGGTTTTGAGTCTCATCTAGGAAGTGGTTGCTGGTCTATAACTGATTCAGTAGTATCATTAGGAAGAACTGAGCAGGTAATGATG…
Seq_255896	Sobic.005G030000	Lr10	Triticum aestivum resistance protein LR10 gene, complete cds.	Triticum aestivum	CTTGCAGTTCCGAGAGCGTATAGCTAGAAGCACCCCAGTTAAGCAGTCATATTTGAACACTGTCTCTTGCATCATCCCTTTTTCTCTGTGTCCATGTCCAGACCAAAATACCAAATCAAGCTTCTGCACATCTATTTGGGAGTGTGATTAGATACACATATGTCTGCAGGAGTAGAGCAAGCCTTGGTGAGCATCTCGACAGGATTGATGAACTCCCTTCTTCATAAGCTTACTATCCTCATGGATGAACAATATCTCAAGCTCAGCAACATGTCGAAGGAGTTGTCATTCATCAGGGACGAACTCAGCACCATGAATGCCTTCCTAGAGATTCTAGCGGACAAGGAGGACCTCGATCCCCTGACCAAGGATTGGAAGAGCCAAGTAAGGGAGATGGCC…
Seq_255965	Sobic.005G094001	Pi2	Oryza sativa (indica cultivar-group) cultivar C101A51 chromosome 6, clones BAC70, TAC40, TAC10, TAC30 sequence.	Oryza sativa Indica Group	CTCACTGAACCAAGAGACCATCATAACAAATGAGTCCTTTCTCTCCCAAGTCCAGTCAAAGTCTCCTCCCTCACCACTTCACCAGCAAGCTCCAGCTGCAGCACAACATCAGGTGTATTGTGGTGTACTGCTCTGTTTTGGAGTCTTCTGCCGTGCTGCCCATCTAGATCGAGATCTCCAAGCTCACTATTTGGTCATCAGCTCTTTACCGTATTCATTTGGCAACAAACTTATGCCCTTTTGATCGGTTTGCATCTTTCCGAGGGACTTTCCTCAATTATTATAAGCTTTTTATTTTCAGGGATTATAGGGTGAATATCAGTGGTCATACCGATGTATCAGCACTGCTAGAATTTCTTTGGAAGTGTTCACTACATATAACCTCTTCCTTTGTGTGCT…
Seq_255987	Sobic.005G072000	Pid3	Oryza sativa Japonica Group cultivar Nipponbare resistance protein Pid3 gene, complete cds.	Oryza sativa Japonica Group	CACCAGGTCACCAGCTCGCCAGAGTTCTGAGTTCTGACGCCCCACTAGTGTCCGGGCTCGCGGCTCGCTGGTTGGGCCTTGGAACCGGCCGGATCGGAGCGAGATCGCCTCGCCGGAATCGAAGAGCTCGCCGGCTACCGCACGGGCGACACGTTGCCTTGGCGTCCTCCGCGCTCTGCTTCGCGGACCTCTATCTCCATATGCTTGACGCCTTAGAGCAGTACAGTGCTGTTTCTCGCCAGATGTAACTCCTCCGTCCCGTGTCGAAGGAAGCTGACCGTGACCTGAAACAAAGCCCCGATCTGCAACACTGCTTGTTTTGTTCGCCTATTCAGCTAGGCAACTACACTTGTATCTCCTGGTAACTCGGAGTCCTCTAGCATAGCAAGCGCATACAAC…
Seq_256967	Sobic.007G215700	RFO1	Arabidopsis thaliana RFO1 (RESISTANCE TO FUSARIUM OXYSPORUM 1); kinase (RFO1) mRNA, complete cds.	Arabidopsis thaliana	TGAATTTATTTTCTACATTGCAACTTGTATTTGTGGAGGCCTACATTTCAGCGTCAAAACTGCTGTACTATTCATTATACATGAACAGATTAAATAGGTCCCGAGAATACAATATCGCAAGAATACAAAGTCACATTTACTATTTACTCTGTTTTAAACCTCGTGGCAGTAGTCCTTACAGAAAACAGGAAAACAGAGCAAGAAGTAAATTATGTTCATCATAGACATTACACACAATACTAATGCCTTCATAGTATCCGTGAAAGGAATTATATTTGTGGAATCAACAATGAAGAAAATGCATCCACGGAAAGTTTACACAACAATTTGGAAGGACGAATGAACGAAGTTCGTTGTTGTTCATTGAAAGCACAGGTTTATCGGGGGTAGCTTCCTGAC…
Seq_257134	Sobic.003G048700	Xa26	Oryza sativa (japonica cultivar-group) bacterial blight resistance protein XA26 (Xa26) gene, complete cds.	Oryza sativa Japonica Group	AGGCATAAAGCAATGCCACCACCATGCTTGCACTGGAACTGTTGCAAAGTTCATCGCATGATTCCAGTTCTCCATGTTTTTATTTTTCTTTCAATATGTTTTTACCCATCTATACTTACTGCTTGGGTTTACTTTTGTGCAGTGCAGCTAGCAGCTTGAGCCTTAGGACACTGAGCCAGGTAGTTTCCAACTAGCCTTGGGGTCCAATGATGCAATGATTCTTGCCTGTAATCATCCATGCAAGTGGAGAAAAAGGTGAATCAACTCTGTTAGATCCTGGGGAATAGTTATATACATAACAATAGATACTCTACAGCATAAAGCTGGCTTATGTGACTTTAAACATTTTTCAAACTTGCCATCCACACGACCACACATTAGCTCATGGTAACCACAGTC…
Seq_258209	Sobic.002G062600	Pikm1-TS	Oryza sativa Japonica Group Pikm1-TS mRNA for NBS-LRR class disease resistance protein, complete cds.	Oryza sativa Japonica Group	ATCCACCTCCACCTCCACCTCCACTATCCACCCACTCACACACAACTGACTCGCAAACTCAGCCGCCCGCACCGTCCCGGCCGGGATCTGTTCTTCGCCGGTCGCCTGGAGGCATGGAGGAGGCTCCCGTGACCGCAGCCACGGGGGCTCTGGGGCCTGTCGTAGCGAAGCTGAGCGCTTTGGTTCGCCGCCGCGGTGAGTACCAGCTTCGGTGGCGGACTCGGAAGGACGTGAAGCTCATGAGATCCAAGCTCAAGTCCGTCCACTCAATCCTTTTGGTGATATGGGAGAGGGAGGATCTTGATGCGGCAGGCAAGGAGCTGAGGATGGAAGCGTGGCGTCTCGCCGACGACATGAGCGATGCCATCGACGACTTCATCCTCACTATGGAGCGCAGCA…
Seq_259314	Sobic.004G216200	RFO1	Arabidopsis thaliana RFO1 (RESISTANCE TO FUSARIUM OXYSPORUM 1); kinase (RFO1) mRNA, complete cds.	Arabidopsis thaliana	CGCGGCCCTGCACGTGAGCGGCACGGGCATCCAGTACCAGCAATCCAGCGGGCAACTGGGCGAGGCGAGAAGCCAAGGATTCGACCGTTGCGTTCTCCGCCCAGATCGAGCCTCAATTAAAACTTTTCCTCGCCTCGCCGCTCCCCGTCCCTACCCCCCCTACCCACGCTTCCTCCCCCTCCGCGCCGCTCCTCCAGGCTCCAGACATGGCGATCGCCACTGAGTCGCGCGGCAGCGAGGACAGGGCTTCAGCCCACGCAAACGAGGAGAAGCGGTGGGTGCTGTCTGATTTCGAGGTTGGAAAACCTCTTGGGAGGGGCAAGTTTGGCCATGTTTATCTGGCCAGAGAAAAGAGGAGCAGTCAAATTGTGGCTCTGAAAGTGCTTTTCAAGAGCCAAC…
Seq_264460	Sobic.005G222700	RFO1	Arabidopsis thaliana RFO1 (RESISTANCE TO FUSARIUM OXYSPORUM 1); kinase (RFO1) mRNA, complete cds.	Arabidopsis thaliana	TGAGCATTGGCTGGCTGTGCGCAGGTTCTTCTACTTAAACACTAGCAGCAGGATGGCGCACGGGTCATCGTTATAAGCCAATAATAATGTCGCCATCTCTCCTGCTGCTGCCTGTGCTCCTCCTTGCAGCAACGGCGGTTGCCAGCAGCGTGTCCGTGATGCCCCGCTGCCAGCGGAGCTGCGGAGGCGTAGACATACCTTACCCGTTCGGCATCGGCGATGACGCCTGCTTCCGCCAAGGGTTCGAGATCCGGTGCACGAACAACAGCAACGGCAGCGCCGGCGGTGAAATTCCAGTGCTAGAGGGAACCAACCCGACCATCCCAGTGCTGAGCCTGTCCGTGGCGCCATTGCCAGTGGCCCGGGTGCTCCTGCCGGTGGTCTGGCAGTGCTTCAACT…
Seq_265266	Sobic.009G259500	Cf-2	Lycopersicon pimpinellifolium leucine rich repeat protein Cf-2.1 gene, complete cds.	Solanum pimpinellifolium	AGAAGGCCAGCAGCCGCACGATGTGCCGGTGCCGGATCCGACCCAGCGTCTCCACCTCCGCCTGGAACCCTCCGCCCTCCGCCGACACGATCCGCTTCACCGCCACGCACTCCCCGCCGGGCATCGTGCCGCGGTACACCACCCCGGCGCCGCCGCGACCCACCACGCAGTTCTCCTTGACGCACCGCACCACGTCCTCGCACCCGAACGACACCTTCTGGAACGCCGTCATGCGCCACCGCCGGCTCGACGACGACCGACGCCGACGGAGCATGGCGGAGCGCGTCGTCGCGACCGCCACCGCAGCGAACGCCACGGAGCAGCCTAGGAGGCCCAGCGCCGCAAGCAGCTTCAGACGCCCCACCACCTGCTGCTGCGGCTGCTGCGTCCCGGCACCGA…
Seq_268551	Sobic.007G014500	Pi9	Oryza sativa (indica cultivar-group) putative nitrate-induced NOI protein (75-1-127BAC12.1), putative NBS-LRR disease resistance protein (Nbs1-Pi9), putative NBS-LRR disease resistance protein (Nbs3-Pi9), and NBS-LRR disease resistance protein (Pi9) genes	Oryza sativa Indica Group	GGAGACGGCGATCGCGGCGGTGCTGTCCAAGTTCGGGGAGCTGGCGGCGAGCGAGGCCAAGATCCTGCTGGAGGTGGGCGACAACATGACGCTCCTCCGCGACTGCCTCGAGTGGCTGCAGGCCTTCATCCGCGACGCCGACCGGAGGCGCCGCGTCGGCACCGACGACCAGCTGACTCGCGTGTGGGTGCGCCAGACGCGCGACGTCTCCTTTCAAGCCGAGGACGCGCTCGACGAATTCGTTTACCAGGTTGACCTGAAAAGGCAGGGTTATCGACGTTGGAAGAAAATGTGGCGCAAATATTTGATTGGTTTTTGCACCCAAATCTTTAGTCGACATGTGTTGTCTGCCCGAATCACAAGGATCAATATGAGACTTGCAAAAATCGCAGAGAACCA…
Seq_272113	Sobic.005G050300	Cf-2	Lycopersicon pimpinellifolium leucine rich repeat protein Cf-2.1 gene, complete cds.	Solanum pimpinellifolium	GCAAAAATGCAATCTTCCTCCATTCCTCTGCTCTACCTCCACCTACTAATATTGCCATTCTTCCTCCTCTTGCAACAAGCAGATGCAGACACGGTGCCTCATCATGGGGGCATATCACTAAGGTCCCAACAGATGGCCCTCCTGCACTGGAAATCTACACTTGATAGCTCCCCGGTGCAGATGAGCTCTTGGCAGCACCAGACCAGCCCGTGCAACTGGACGGGAATCATGTGCACGGCCGTGCACCATGGCCGCCGCAGGCCTTGGGTGGTGACCAACATCTCCCTGTCAGGCGCCGACATCCATGGCAAGCTTGGTGAGCTCGACTTCTCAGCTCTCCCATTCCTCACATCCATTGACCTCAGCAACAACACTCTCCATGGCCTAATACCAACCAAA…
Seq_272718	Sobic.009G165900	Serk3A	Nicotiana benthamiana SERK3A (Serk3A) mRNA, complete cds.	Nicotiana benthamiana	TCGCCATCGCCATCGCCATCGACCATCTCCCCGTGGTGGCCCCGTGCCCCTCTCCGGTCGCCTGAGCAAGCCACCACTAGTCGGTCACGCTCCCCTGCTCCGCGCCGACCGGTCGGGTTCATTTGGTGCGCGGCGAGCCCGGGCATGGCGTTCCACGAAATGGAGATGCCGCGTCGGTGCTGAGACGCCGGGGCATGGTCGGCGCGCAGTGACGGCGGCCGGCGGCTCGGTCCGTTCGCGCGTGCCCTGCGTTCTTGCCTTCGTCGAGTCGTCGCTCGCTCGCGACCCCGCCGCCCGCGCCCGCCCGGCGCCCACAAAGTCGCAGCCACGGGGAGGCGCGGAGGGAAAAGGAAGATGAGCTGCTTTCCGTGCTTCGGCGGCGGAAAGGGCAACAATGAC…
Seq_273472	Sobic.010G028950	Pto	Lycopersicon pimpinellifolium Rio Grande-PtoR protein kinase mRNA, complete cds.	Solanum pimpinellifolium	GCCCACTAATTCAGCCAAGCCAGGATCAGCCATTTTGTTAGCTGAAATTTTGGGCACCAATTCCTCCTTATCCAAAAGAATATTCACCCTCAGGTTATGGTTGATGAGTTGGGGTGTGTTTGCTTCAAATTCTGTTAGGCAGCTCACCTTGAGCCCTGTCAGGTTCAGGCAGCTCCGCCCGGGAGCGAACCAAATAGGGCCTTGGTGCTTGGCACCTCTTTGAAGGTAGTGCAGACCACGGGCTACACCGATACAGATCTCCAGACGCTGCTTCCAGGTAAGTGGGTTCTGGGTCTCGAAGAGATGCTCATGTAGGCTTCCATGATCAATGTAGGTGTACACCAGGATCCTCTCGTCATTCTCATCGCAGTAACCAACAAGGGGCACAATGTTGATGTG…
Seq_273685	Sobic.002G314700	Pid2	Oryza sativa Indica Group cultivar Digu B-lectin receptor kinase (Pid2) gene, complete cds.	Oryza sativa Indica Group	TGCACTTCAGCTCTGAACTGCTTGTCTGCTTGCCCAAAGCCTTTGAGACACTTCACGGCGACGACGGTTGGCCCTGGCATCGTTCCCCTGAAAACACAGCCGAAACCTCCCTCGCCGAGCTTGTCGGAGAAATTCCTCGTTGCTCTCTTGATCTGTGCATATGGGTAGACAGCAAGAGAGCCTTCCACCTCTTGGAAATTTCTGCAGGTAGCAAACAAAGCTCTCCTGTCCCTGTATCTCCATACAAGCGCTAGTATCAATATCACACAAGCTGTTGCTGTCAGTCCGACAACCATGAACACAATCCCTGTTGTTTTCGAATCTTTTTGAGCCCCGAGCTCAGAACCCAAACGAACATAAACCTTGCTGTACGGAGGTGTAGCAGCGAAGCTCACGTTG…
Seq_275678	Sobic.009G020200	Pi9	Oryza sativa (indica cultivar-group) putative nitrate-induced NOI protein (75-1-127BAC12.1), putative NBS-LRR disease resistance protein (Nbs1-Pi9), putative NBS-LRR disease resistance protein (Nbs3-Pi9), and NBS-LRR disease resistance protein (Pi9) genes	Oryza sativa Indica Group	ACGACCCACCAGCGCAACGACACAATAGGGCATGACAAGGTTCGGCGGCTTTCCATCCAGGCCGGTTGCTGCAATAATAGCAGCAGCCTGTCCAGTAGAAACCTACCCAATGTCCGTTCTTTGACAATCCTGGGCAGCACAGCCACAGAGAGACCACTGGCTACCATCACTTTCACCGACATGACACTTTTGAGGGTCTTAGATCTCCAGGGGTGCCGCTGGTTGAGTAAAAAAGATCTCAAGGACATCTGCAGACTCCATCTGCTGAGGTACCTGAGCCTCAGAGGCACAACCATACCGCCACAGCTGCCAAACAAGATAGGGGAGCTCAAGGCACTGGTGACGCTGGACGTGAGGCAAACTTCAGTGAGAGTCTTGCCCAGGAGCATCACACGGCTG…
Seq_278977	Sobic.009G105500	Pid2	Oryza sativa Indica Group cultivar Digu B-lectin receptor kinase (Pid2) gene, complete cds.	Oryza sativa Indica Group	ATTTGCATGGTTCTTTGTTTTGAGGAGGGAGTTGAGGTCATCACAAGTATTGGCAGCTGAGGAAGGCTACAAGATGATGACAAATCATTTCCGAATGTATAGTTACAGGGAGCTGGTTAAGGCAACTGAAAAGTTTGCACATGAGCTTGGATGGGGAGGTACAGGGGATGCCTACAAGGGAATTCTGGACGATGATCGAGTGGTTGTCGTAAAAAAGCTGGGAAATATAAGGCACAGCAGAGAAGAATTCCATGATGAATTGCATGTCATTGCAAGGATCAACCATATGAACCTAGTAAGAATATATGGATTTTGCTCAGAAAGATCCCATAGGATGTTGGTCCTCGAGTATGCTGAGAAAGGATCCTTGGCTGACGTATTATTCAAAAGCAAAACCTC…
Seq_279504	Sobic.008G175032	EFR	Arabidopsis thaliana EFR (EF-TU RECEPTOR); ATP binding / kinase/ protein serine/threonine kinase (EFR) mRNA, complete cds.	Arabidopsis thaliana	ACTGTAGTAAGCTTTTTTATATATCTTTTGATTCTAACAACTTCCAAGGCGTGTTCCCGCCTTCTATCGTCAATCTCTCCAACACAATGCAAAATCTTCATCTAGCACACAACAAATTCCATGGAGCAATTCCTTCAGATATTTGGAAACTTTCGAATCTTACCATACTTATTCTACGGGGTAACTTCCTAACGGGCAGCATACCGCTATCAATTGGGGAGCTTTACAACTTAGGAGCTTTAGACTTGTCCGAAAACAACATTTCTGGGGAAATTCCTCCTACAGTAGGGAACCTGACAAACCTTTCCATACTTTACCTATTCAAGAACAACTTGCAGGGATCCATACCCACAAGCTTGGGGAACTTGCAGAACATTGCTAGTTTAGTCTTGTCATTTA…
Seq_281846	Sobic.010G235100	LeEIX7	Lycopersicon esculentum EIX receptor 2 (Eix2) gene, complete cds.	Solanum lycopersicum	GGGCTCTAAGGAGTTTGAGGTATATTAACTTCTCAAACGCAAATTTTCAAGGGGAAATTCCTTCTCATATTGGAAATCACTCCGAGTTGCAATGTTTTGACATCAGCAATAATGATCTGAACACGCCAGATCTCTCGTGGTTGCATCATCTTTCTCTGCTAAGGCATCTTGATATGAGCGGAGTAGACCTCAGTTCTGCAAGAGACTGGGTTCGGTGGCTCAACATGCTTCCTGCTCTTCGAGTTGTTCGATTGTCAGACTGCAGGTTTAGCAGATCGGAAGAGCACACG
Seq_282355	Sobic.004G103200	Pid2	Oryza sativa Indica Group cultivar Digu B-lectin receptor kinase (Pid2) gene, complete cds.	Oryza sativa Indica Group	GGGTTTGGCCTATCTTCATGAAGAATGCCGCCAGAAGATTGTTCATCTTGATATTAAGCCGGGAAATATCCTCCTTGATGACAAGTTCAACGCAAAGATCTCTGACTTTGGTTTAGCAAAGCTTATTGATAGGGATCAAAGCCATGTGATGACCAAAATCAGAGGAACAAGGGGTTACCTAGCACCGGAATGGTTGTCATCAACAATCACTGAGAAGGCAGATATTTACAGCTTTGGCGTAGTTGTGCTGGAAATAGTGAGTGGAAGGAAAAACCTGGAAAACAATCAGCCTGAGGGTAGCCCTAATCTAATTAATATACTGCAAGAGAAAATGAAGGTTGGGCAAGTTCTGGATATAGTAGACAATCAGGATGAAGATCTCCAGTTACATGGGTCAGA…
Seq_282850	Sobic.002G326500	Pid2	Oryza sativa Indica Group cultivar Digu B-lectin receptor kinase (Pid2) gene, complete cds.	Oryza sativa Indica Group	AGGACTTCCTCGCCGGAGCCGGAGCGGGCGCCGCCAACATGCCGGAGAGCGCCGCCTCGAACATGAACAAGGTGTCCGCCGGGAACGCCGCCGCGTTCGACGCCCTGGTCACGCGGCTCGTGGACGCGGTGTCCGACGCCGCCAGCAACAGGAGCACCCGGTACGCCACGGGCCAGGCCGGGTTCCCGCCGGAGAACATGAACGTGTACGCGCTCGTGCAGTGCACGCAGGATCTGACGACGGGGCAGTGCCGGGAATGCCTCACCGACCTCATCGACCAGATGCCCCGTTTGTTCGCCGGGAAAGTTGGTGGGAGGATTCTCGGCGTGCGCTGCCACATCAGGTACGAGAAGGATGTCTTCTTCGCGCAAACCCAAGATATGCTCACGCTCACGCCGC…
Seq_283885	Sobic.003G274900	LeEIX8	Lycopersicon esculentum EIX receptor 2 (Eix2) gene, complete cds.	Solanum lycopersicum	CGAGCTGCGCCTCCGCCTCCGCCCCTGCCCCGAGCCCCGACGCCGTCGCGCTGCTCGCATTCAAGTCGGTGTGCTCCGACCGCGCCGCGGCGCTCGCCTCATGGACGGAGTCCTCCGATCCCTGTGCCGCCAAGTGGCGCGGCGTCACCTGCCGGCGCCCGTCATCGCTCACCTCCCCGCTCCGCGTGCGTCGCGTCGTCCTCGAAGGCCTCCGGCTAGGCGGGCACGCCGCGGCGCTGGAGCTGCTCGCGGATCTCCCCGTTCTCTCGTCCCTTAGCCTCAAGAACAACACCTTCACGGGCGCGCTCCACGGCGTCGACTTCTCCCGCCTAGCGCCGCACCTCAAGCTTCTCTACCTCTCCGGCAACGGCTTCTCCGGCCGGTTCCCCGAGTCCGTCC…
Seq_286479	Sobic.005G127800	LeEIX1	Lycopersicon esculentum EIX receptor 1 (Eix1) mRNA, complete cds.	Solanum lycopersicum	AATCTAGATTGGGAGTGGGTTTTGGGAACGCTTGGAGATGCTCTAAGCTGGGTGCTCCAAGATTTTATGGTATAGGTCCTGATAAAGAATTACTTGATAAGTCCAATGTGGTCAGGTTTACTGGCATCAGAGGTATTGGACCAGTTAATTGGTTTGATGCGAGAGAGAGTCGTTCCAACGACATGTGTTCCATGTTTACTGGCAGCCGTCCGTGGATGTGATTATTAGAGAAGTTCAAGTACCAGGCGTTTGAAAAGGTACTAGAAATCCAATCTGGAAGACAATCATCTATACCTGTGTTAGAAATATCAAGAAAATAAATATCCACCATCCATTTAAGCCAAGAAGGAAACTGAGGCCCCATTCGACAAAAGGCAAAATGTGCTCCTTGTAGTCTGA…
Seq_289130	Sobic.005G065000	xa21	Oryza sativa Indica Group Xa21 gene for receptor kinase-like protein, complete cds, cultivar:II you 8220.	Oryza sativa	ACTTTGGGTAATTGTGAAAGTTTGGAAGTTATCGCGCTGGGACACAATTTTTTCAGTGGAAGCATTCCGCCTTTGCTTGGCAATATAAGTAACCTAAATTTTCTGAACTTATCTCATAATAACCTGACTGGATCAATACCAGTAGCTCTTAGTGGCCTACAGTTCCTTGAGCAGCTAGATTTGTCATTCAACCATCTAAAGGGTGAGGTGCCAACAAAAGGAATCTTCAAGAATGTGACAGCTTTATGGATTGATGGAAATCAGGGGCTTTGTGGTGGACCACTGGGCTTACACCTACATGCATGTCCTACCATGCAATCGAATTCAGCTAAGCACAAGCTTTCAGTTATCCGAAAAATAGCCATCCCAGCAGCCATAGTGCTGGTATTTACAGCAGTC…
Seq_289174	Sobic.001G310800	Serk3B	Nicotiana benthamiana SERK3B (Serk3B) mRNA, complete cds.	Nicotiana benthamiana	AGCCTTGTGTCGAACGTGTCGGAGCCGGCCGCTTACTTCACCGACGACGGAAAGAACGTCTCCGTGACGCTCGAGAGCGCGCAACAGATTCAGGCATGGGTGGACTATGATGGCAGCACCAAGGTCCTCAACGTGACCATAGCTCCGGTGTCCGTGGCAAGCCGGCCTCACCAGCCGCTCATCTCCCACGTCATTGACCTCCTGCCCATCTTTAAGCAAGACATGTATGTCGGCTTCTCGGCAGCAACCGGGAAGTTGGCGAGCTCACACTACATCCTCGCATGGAGCTTCCGTACCGGCGGAGCTGCTCAAGCTATCGATCTCTCCCGGCTCCCTAAAGTCCCAAAGCCTCCAGCTCCCCCACCTTCCATGTCCACGGTCATAAAGATCGTGGCTCTA…
Seq_291244	Sobic.004G017000	LeEIX9	Lycopersicon esculentum EIX receptor 2 (Eix2) gene, complete cds.	Solanum lycopersicum	AACAAAGGGAATGTTCCTGAAAGGTTGTTACTATTCAAGTTAAGCAACTGAATATTTGATGCTTCGGACCCATGAAGGCAATTGGGCAATGTCCCGTTTAGTAGGTTTTCTGATAGGTCCAGAAATTTCAACTGTTGCAACTGAAGCAAGGAGCAGGGAATGGTTCCAGAAATCGAATTATTGAAGAGAATGAGTGTTCCCAGCATTGGTGCCCCAATATCCAATGGCAGTGTGCCTGATATATTGTTTTCAGAGAGGTCTAAGTATAATAGATTGTCTGGAAGTTTAGGAATCGGACCAACAAGTTGGTTAGAACTGATGTCCAATGAAGCTACTCGCAAACTACTGAAATATGCGGGAAGCCTGCCAACAAGCTGATTTCTTGACAAATCCAAAACA…
Seq_291372	Sobic.007G206000	Hm5	Zea mays NADPH HC toxin reductase-like protein (Hm2) mRNA, complete cds.	Zea mays	GGCCTTTAGATTAGTTATAGTAGGTGACAGTACATTAGCGTTCGGTTAAATTATTAGCCCGGTCTATGAGCAGAGTACGAATCAAAAGTTTTTCCACCAGCGACTGACAAACTTTTCAGATCAAGAGGCTACGCGTGCTGGCTTGCGTCGTCGGCGGCGGGGAGATGGCCATGGCCTCTGAGCGAGTCGACAGCGTCGTCGAACATCTCCTCGACGCCCTTGAGCTCTGCCAGCCCCAGCGCGCCGGCCTTGGACGTGTCGAAGCCGTACGACTGCTCGCCGTAGACGCTGGGCAGGCTCCTCGGGATCGGGTACGCCGGGAACCGCCGCGCGAGCAGGGCGACGAGGTCGCCGCAGTCCAGCACCGCCGCGTTGCAGATGTACCTCCCGTGGGCGCCG…
Seq_293694	Sobic.010G167700	ER - Erecta	Arabidopsis thaliana ER (ERECTA) (ER) mRNA, complete cds.	Arabidopsis thaliana	TGCAGCTAGAGGACTGAGCTACATGCACCATGATTTATCTCCACCTATAGCACATCGAGATGTCAAGTCCAGCAATATCCTGTTGGATCTTGAGTTCAAAGCAAAAATTGCAGACTTTGGTCTGGCTCGTTCACTTGTTAAAGCTGGCGACCCAGAGTCAATCTCAGCAATGGTTGGATCCTTTGGATATATGGCTCCAGAGTTTGCAAGCATAAGAAAGATCAACGTGAAAGTTGATGTCTACAGCTTCGGGGTGGTTCTCTTGGAGCTGACAACTGGGAGACGCGCAACTGGTGAGGATGGTGGTCATGAGAATTTGGCACAATGGGCCTGGCAGCAATTCCAAGAAGACAACTTTCAGTTGATGGATGTAATCGATGAAAATATACGAGATGCATC…
Seq_294959	Sobic.001G353700	R3a	Solanum tuberosum potato late blight resistance protein R3a gene, complete cds.	Solanum tuberosum	GCCGTACGTTATAAAGGCACTCCTCGACGTTTCCTCCCTGACAAGAGAACATGCTGACGCATACCCTGATCACAATTTGGAACAAAGTGACCAAAACAAGTGTGAGGGGGTATCCTTGATTGCCATATAATCATAATGAACTCCCCTTTTGGCCTAGCAGTAGGATCTACCATAAGTTCTCGAATTGTCACCTTTGGTAGTTCCTTCTTCACTGAGTCATCATGGGCTTTTGTACTCCACGCCAAGTGAAATGGAGCACCAGGGGTTAACTCTAGGTCTGCCATGTCTACATGATGACCCCGTTCAGCAAGTGCTTTAGGATACGCGCCAAAAACGGACATGTTTCTCTCAGTTATTCTCCTAGTCTTGTTTAACATGCAAAGCCAGAAACGTATGTCG…
Seq_298459	Sobic.008G007400	Xa26	Oryza sativa (japonica cultivar-group) bacterial blight resistance protein XA26 (Xa26) gene, complete cds.	Oryza sativa Japonica Group	GCACATGTGGCAGACTTCGGCATTGCAAAGCTATTATTTGGTGATGACAACTCTGCGGTTTCTGTGAGCATGCCAGGAACAATAGGGTATATGGCACCAGAGTACGGATCCAGTGGAAAAGCGTCAAGAAAGAGTGATGTATTCAGCTATGGGATCATGCTTCTTGAAATACTTACAGGAAAGAAGCCAACGGATCCAATGTTTGGCGGACAACTAAGCCTCAAGATGTGGGTCAATCAAGCATTTCCAAGAAAACTTATCGATGTTGTGGATGAACGTTTACTTCAAGACCCTTCAATTAGTTGCACGGATAACTTCCTTGAGTCAATGTTTGAACTGGGTTTACTATGCTTGCGTGACATACCTGACGAAAGGGTGACAATGAGTGATGTGGTTGTG…
Seq_298505	Sobic.003G334400	Ve1	Lycopersicon esculentum verticillium wilt disease resistance protein (Ve1) gene, complete cds.	Solanum lycopersicum	AGTTCCTTGATAGGTTCAGCACTTAGAAGCTTGAGTTCACCAATCTCGCTGGGTATGATACCATCAAAGCTATTCTTTGAGACATCAATGGATTTGAAGGTAGACAGGATCCTTACAAGCGTCACATCCAGTCCCTTTAACGTCACAGTGACAGAGTTCTCGTAGTATGTGTCAGTCAAATACTGGTACCCAATTGCCTGAGCCTGGCTTTCGACTTGGGAAGAGTTAATCATTGCTTTCAGTCTCTCCAAGCACTTTGCTGGTAAACTACCATTGAAACTGTTCGAAGATATGTCAAAGACTTGCAATGCTGGAAAGAAATTTGTTCAATCACTGATGGAAATGGGGCCATGGAATCTATTTGATCGCAGAACAAGCACTCTCAACCGAGAGAGGTCT…
Seq_301155	Sobic.010G161000	RFO1	Arabidopsis thaliana RFO1 (RESISTANCE TO FUSARIUM OXYSPORUM 1); kinase (RFO1) mRNA, complete cds.	Arabidopsis thaliana	GGCTCGGCGACGACGCGATGATGTCGAACGCGTTCAGACTCTTGGGGCGGCGCATGCGCAGCTCTGCTTGGACGGCGACGCTACCAGTACTCTCGAGTGTGGTCAGCGACGGCGCTGACACCGAGGTATGCATGGGGCACGCTATCGGGGAGGCCGGGTCCCCTGACGACGTAGATGACGCCATCGCCTCGTCGTCAGAATCAGAGTTGGAGTCGCGCAGCTCGGGCTCGCTGAGGCTCCGTGGGATCTCCTTGAAGTCCTTCTTGAACCAAAGATTTTCCTTCATCTGTGGTATGGCGATACGACGCACCGGGTCGGGGCAGAGGATGCGGCGGACCAGGCCGACGAGGCCGGTACTAAACCACGGCGGGCAGTGGTAGTCACAGCGGTGGATCATGT…
Seq_303018	Sobic.002G172200	PEPR1	Arabidopsis thaliana PEPR1 (PEP1 RECEPTOR 1); ATP binding / kinase/ protein binding / protein serine/threonine kinase (PEPR1) mRNA, complete cds.	Arabidopsis thaliana	TCACTGGGAATGTCCCTCCGGAGCTTGGGGAGATCGTCGAGATAAATACGCTTGACTTGTCAAACAACGAGCTTTCTGGTCAGTTGCCTGTGCAGTTGGGGAATCTCAAGCTAGCTCGTTTCAACATGTCCTATAACAAGCTCTCAGGGCCTTTACCCAGTTTCTTCAATGGCATACAGTACCAGGACAGCTTCTTGGGCAACCCTGGCCTGTGCTATGGGTTCTGTCAGAGCAACGACGATTCCCATGCCAGACGGGGCAAGATTATCAAGACGGTGGTCCCCATCATAGGTGTTGGTGGGTTCATCCTACTCATTGGCATCGCTTGGTTCGGCTACAAGTGCAGGATGTACAAGATGAGTGCAGCCGAATTGGATGATGGGAAATCTAGTTGGGTGC…
Seq_303438	Sobic.005G183300	PIB	Oryza sativa Japonica Group mRNA for Pib, complete cds.	Oryza sativa	CGTGACGGTCGCATTGGCCAACGATCACGTGCTCAGCGCCATATGGGCGGACGAAACTAGTTGTGCTTCAAAACAGGCTTGATCTCCCTCTGGTTCTCACCAAGTTGGTTCTCCAACTGTTGCTTCACTTTGTCATCGTAGGATCCGGTGAGCGAGACTTCCCTGAGCTTGCGTAGCTTCTGTACCCCAGAAAGCTTCAAGGACGACACATTATTATGGCAGCGGATCTTGAGGACCTCAAGCTGTGGCATTGAACAACAACCATGAAACGTAACAGCCTGTAACTTGCAGTTGCAATCAATCTCGAGGATCCATAGCCGCCGACAGGGTCCCCTGAACCGGAGCTCTCCATATTGGAAATCCTTGGAAGAAAGACATAAAGTATTTAGACTTGGTAAA…
Seq_305333	Sobic.003G079400	Pid2	Oryza sativa Indica Group cultivar Digu B-lectin receptor kinase (Pid2) gene, complete cds.	Oryza sativa Indica Group	TCCGACGTGTACAGCTACGGGATGCTGCTGCTGGAGATGGTCGCCGGGAGGAGCAACGCCAAGGCCTACGCCGAGAATAAGTCCAGCGGCGACATCTTCTTCCCGCTCTGGGTGTACGACCACATGCTCGAGGACGATGGCGGCGGCGTGCTGCAGGGCGGTGGTGACGCGGGAGGCCCCGGAGCAGCAGCAGGCGACGAGATCGCGAGGAAGATGGCGCTGATCGGGCTCTGGTGCATCCAGACCGTGCCCGCGAGCAGGCCGTCAATGAGCAGGGTGCTGGAGATGCTGGAGAGGAGCATCCACGAGCTCGCCATGCCGCCCCGGCCGTACCACACTTCTCCGTCCAACTCCCCGTCGCCGTCGCACCCGTCCAGCTATCCACCCTCCACCTCGGAT…
Seq_306571	Sobic.002G174600	Pid2	Oryza sativa Indica Group cultivar Digu B-lectin receptor kinase (Pid2) gene, complete cds.	Oryza sativa Indica Group	ATCGTTTGCTTGTATATGAATATATGTCAAATGGCCGTCTCAGCGATCATCTCGCCAATCCAGAAAGGCATCTGACATGGTCAATGAGGCTCAAAATAGCGCTCGGCGTAGGCTCGGCACATGAATACCTGCACGACCAGGACCGTCCCATGCGGGTGCGGCACGGCAACATCAGGGCGGACAACGTGATGCACGATCGGTTCATGGACAAGCTCGTTAGTATCGGCGCAGCGAAGCAAATTGTTACAGTGTAAACCAGTCTAAGGGCCTGCCAA
Seq_307497	Sobic.002G077400	Cf-5	Lycopersicon esculentum disease resistance protein (Cf-5) gene, complete cds.	Solanum lycopersicum var. cerasiforme	ATCACCAAGTTCCCAAGTTCCACAGGTAGCTTGCCTGTGAGTTTGTTGTTGCTCACATCCAACAACATCTGTAGCCCTCCCAGACTACCAATAGTTGTTGGCAGAGGTCCACTCAAGTTGTTGTCGTTAATACTTAAGGAGATTAGCTTACTACAGCTCCCGAGCTCTTGTGGTATTGATCCACTCAATTTATTTGCAGATATATCGAGGTATTGTAAATTTTTCAACTGACCAAATTCAGGTGGTATATTGCCTGAAAGTTTGTTGTGTGATAAGTTTAGCAAGTACAGGTTGGCAAGATTGCTTAATTCTTTTGGTATACTGCCAGTTAGGTTGTTGTCATGTACGGTAAGTACCTCCAATTTTTCAAGGTTTGAAAGCTCGGGAGGCAAGCTTCCG…
Seq_311718	Sobic.007G212000	PEPR1	Arabidopsis thaliana PEPR1 (PEP1 RECEPTOR 1); ATP binding / kinase/ protein binding / protein serine/threonine kinase (PEPR1) mRNA, complete cds.	Arabidopsis thaliana	TATGAACAATCATTGGCACACAATCATGGTGGAGATAGGATAAGCCCTGAGCTGCACCAAGGGCGATCTGATGCCGGACCTTCCAGTCAAGAGGCACTTGAGGTTTTCTTCCATGCAATAGCTCAAAGAGTGTTCCTTCAGGCATGTACTCGGAGAGAATCACACCAAAGTTGCCACGGATGCAGTAGCCCTCCATCTTGACGATGTTCCGGTGCTTCACCATGTTCAGGATCTTCATCTCGATGGGGAATTTGATCTGGGACAGGTCGATCGTCTTGACCGCCCACTGCCTTCCGGGAGCAAGCTCCGTCCGGTAGACCGTGCCATGCCGGCCTCTCCCGATCACGTACTTCTCACTCCAGTTGTCAGTGGCACGAAGGATGTCATCATAGGTCAGGT…
Seq_317591	Sobic.001G159200	Pid2	Oryza sativa Indica Group cultivar Digu B-lectin receptor kinase (Pid2) gene, complete cds.	Oryza sativa Indica Group	AAAATGGTGCGCTAGTCCATCATATCTCAAAAGCTTCCTCTTAAGAAGCGCCATCCATAAATCATCTCTCCAGCAGACAGCAAAGGTTCCTCTTCCTTCATCTTCATCGTAAGTATAAAAAGGTCACCATGCAACATCTTCACACGTCGATAGCCATTCTTTTATTGCTTGCTTCCTTTTCCACCTCAACGCTGTTGCCGGGCTCTCTACTGTACCTTCCCCAATCTCTTGGAAAGTTTCAAATATGAAAGGCAAAATAGCCATGTGCAACAGATCTTTTATCCTTCCTGTTCTTGACCATAGCATCATGTCATATACAACTTATTTTGGCTTCTACAGTATAGATGGTAAATTGTTCATTCTCTCTATTGTGATTGATGGCCTCCAAGCTCCAGTGAT…
Seq_318072	Sobic.002G321200	R3a	Solanum tuberosum potato late blight resistance protein R3a gene, complete cds.	Solanum tuberosum	AAATCTCCAAGGGTTAGAGGAGTTTCCTGTTGGCAAAACAGAAGGGCACAAAATAACAGAACTGAAGAACTTGAATGAAATTAGCAGGAAACTTTGTATCAGTAATCTCGAGGAAGTAACCCACATAGATAAGCGTGATGCTGTACTATCCAAAAAAGTGTACTTAAAGAAGTTGGTGTTGAAATGGGGCTTGGCAACAGGCACATCAACAATTGCATCTTATGGTTGCATGGAAACGCTTAACAGCCTAGAACCAAATGCAAATCTTGAAGAGCTTAAGATTCAATGTTACATGGGAGTAGGACTTCCAGCATGGATGGCAGATAAGGAGCGTTTCACCAAACTGAAGCACATTCATCTTGTTGAATGTAAACAGTTAAGAACGCTTCCACTTCTCGG…
Seq_326605	Sobic.004G128100	Lr34	Triticum aestivum chromosome 4 clone BAC ABCT5; BAC ABCT33 map 4A, *** SEQUENCING IN PROGRESS ***, 7 ordered pieces.	Triticum aestivum	AGGAGACAACACATCGCTATGGACCAAATTCCTTCAAACTTCACAGGTTGCCGGTTCCAAGGCCTGGGAAAGTTTTGGGCTTAGTAGGGACAAACGGTATTGGAAAGTCAACTGCACTTAATATTCTGGCTGGAAAGTTGAAGCCTAACTTGGGTAAATTCGTGGATCCACCAAATTGGGATGACATACTGAAGCACTTTCATGGAAAAGAACTTCAGAAATACTTTACCCGTTTTTTGGAAGACAAAATGAAGACAATTATTAAACCTCAGTACATCGAGCATATTGCAAAATCTGTTGAAGGGACAGTTGGTGACAAGCTTAATAAGATAGACAAGAGACAAGCCAAAGATACTTTGTGTGATATTCTCGACCTGAATCAAGTAATGGACCGAAATG…
Seq_330980	Sobic.002G080200	RFO1	Arabidopsis thaliana RFO1 (RESISTANCE TO FUSARIUM OXYSPORUM 1); kinase (RFO1) mRNA, complete cds.	Arabidopsis thaliana	CCCCCCCGGGGCCCCCCCCCGCCATGTACTCGTACACGAGCGCGTGGTCGCCGCCGCCGCGCCTGCCGAGGCAGTAGCCGACGAGCGTGGTCAGGTTGCGGTGCCGCAGCTTGGCGAGCACGGCCACCTCCGCGTAAAACTCGGACACCTTCTTGGACCGGTAGATCTTCTTGATGGCCACGCGCTGCCCCGACGGGAGGTGGCCGAGGTACACCTTCCCGGCGCCGCCAGTGCCGAGCAGCAGCTTCTTGTCGTATCCGTTCGTCGCTTGCATCAGCTCTGCCTTGGTGAAGATGTAGAGACCTTCGCGCGGTAGCGGCGGCAGCGACGCCACCGAGTCGTCGTCGCTCGAGTCGTTGCCGCTCTCGCTGTCTCCTCCTGCAGCCATCCTACGACTAC…
Seq_332792	Sobic.001G424200	Serk3B	Nicotiana benthamiana SERK3B (Serk3B) mRNA, complete cds.	Nicotiana benthamiana	CGACGCCAAAAGAGAAAACATCAGCTTTGTCAGTTAGTTTTCCACTAGATAAAAACTCTGGAGCTATGTACCCGAAAGTTCCCATTATTCTTGTGGAAACATGAGTGTGATCTCCTGGTTGATACTTTGCTAACCCAAAATCTGCAACCTTGGGCTCAAACTTATGATCAAGAAGAATGTTGGACGCTTTGACATCACGATGTATGATTTTAGGATAACAG
Seq_335352	Sobic.005G075200	Pid2	Oryza sativa Indica Group cultivar Digu B-lectin receptor kinase (Pid2) gene, complete cds.	Oryza sativa Indica Group	GTCCCCACGGGTCCCTGCAACGATTTCCGTTGTTCGAGGATCTGCTCCGTGCTCGACGAGCCTTGCTGTCCCGAAGTCACCGAGCTTAGCGTTGAATGAGGCATCAAGCATCACATTCCCGGGCTTGATGTCGCCGTGGACAATGCATTTGTCGCAGCACCGGTGGAGGTAGAGCAAAGCAGAGCCCAAATCAAGTATAATCTTGTACCTCTGCTGCCGTGATAAAACTCTAACAGGATTGTAAAGATGCTTGTCAAGGCTGCCTTCAGCCATCAGTTCGTACACGAGAAGGAGCCCTTCACTACTTTCACACCAGCCGACGAGCTGGACAACGTTCCTGTGCCTCAGCTGGTTCAGGACTTTCACCTCTGTCTCA
Seq_337821	Sobic.009G204700	ER - Erecta	Arabidopsis thaliana ER (ERECTA) (ER) mRNA, complete cds.	Arabidopsis thaliana	AAGCTGTACACGTCGCACTTCTCTGTGAGACGCTGAGCTCCAAAATACTCAGGAGCAAAGTAGCCGTCCGTGCCAACCACCCTTGTCTTGGACACATGGGTGTCCTCATCGCGTTGGAAAGCCTTCAGCAGGCCAAAATCAGCGATCTTAGCCTCAAGATTGTCATTCAGTAGGATATTTGATGTCTTCACGTCCCTATGGATGAGACGCTTGCTGCACGATTTGTGAAGATACTCAAGCCCTTGCGCGGAATCCAGTGCAATATGCAGCCTCTGCTTCCAGGTTAATGATCCAGTGCTGCCATCGTCACTCCCTCTTAGTTTGCG
Seq_34456	Sobic.008G031350	Lr1	Triticum aestivum Lr1 disease resistance protein (Lr1) gene, complete cds.	Triticum aestivum	GGGGGGATGCGGAAAACGACGCTCGCACAACATATTTATAAAGAAGCTGAAACATACTTTGACGTGAGGATATGGGCATGTGTATCAACTGATTTTAGTGTGCCTAGACTGTTGAAGGATATTTTGGAATCCGAGTCTCTACATGAACTCTGTAAGAAGTTAAGGGGAACACCAGAGAAACAGATTGAACAAATGTTGACATCTAAAAGATTTTTGCTTGTCCTGGATGATATGTGGGATACTGTTAATAAGGATGGATGGGACATGCTGATGGCACCTTTTAGAAAAGGGCAAGCAGAGGGTAACATAATAGGGCAATGCTACGGCTCACAGTCATTTAAGTGTACCGCAGCAAAGCCCAACATAGTACTGGTCACAACTCGGTCACCATCAGTAGCA…
Seq_34457	Sobic.001G272800	Pit	Oryza sativa Japonica Group Pit mRNA for NBS-LRR disease resistance protein, complete cds.	Oryza sativa Japonica Group	gggggggtggggAAGACKACTCTAGCCCAGAAGATATATAATGACCACAAAATAAAAGGCAGCTTTAGTAAACAAGCATGGATTTGTGTTTCTCAACAGTATTCTGATATTTCAGTTTTGAAAGAAGTCCTTCGGAACATCAGGGTTGATTATAAGCATGATGAAACTGTTGGAGAACTTTGTAGAAGGCTTGCAATAGCTGTCGAAAATGCAAGTTTCTTTCTTGTGTTGGATGACATTTGGCAACATGAGGTGTGGACTAATTTACTCAGAGCCCCATTAAACACTGCAGCTAGAGGAATAATTCTGGTCACAACTCGCAATGATACAGTTGCACGAGCAATTGGGGTGGAAGAAATTCATCGAGTAGAATTGATGTCAGAAGAAGTAGGATGGGAA…
Seq_346654	Sobic.003G079600	Pid2	Oryza sativa Indica Group cultivar Digu B-lectin receptor kinase (Pid2) gene, complete cds.	Oryza sativa Indica Group	AAGCTCAGTCTCTTCATTCTCCAACAGCATGCTCGGAGTAAATCAAATATGGAAGAGATAATAAGGAGATATCAATCACTGACCCCAAAGAGGTACAGTCACTCGGATCTGAAGAAAATAACAAGAGGTTTTAAGGAAAAATTAGGAGAGGGTGGTTATGGTACAGTATTCAAGGGTACTCTACCAGATGGCCATATGGTTGCTGTGAAAATCTTAAAAGGATCCAAAGGCAATGGAGAGGAATTCCTAAATGAGGTTACTAGCATTGGTAGGACTTCCCATGTCAATATTGTCAGTTTATTTGGCTTTTGTTTAGAGGGATCTAAGAGAGCCCTTGTTTATGAGTACATGGCCAATGGCTCTTTAGAGAAGTATATTTATTCAGAGAGTTTAAAGTCG…
Seq_348279	Sobic.010G163800	Pid2	Oryza sativa Indica Group cultivar Digu B-lectin receptor kinase (Pid2) gene, complete cds.	Oryza sativa Indica Group	GTGATTTCTCAGCACAAAATCCAACTAGATTCACCAGATGTATGTGGTTGATGCTTCCAACAGTCTGAACCTCCATTAAGAATTCCATTTCCCCCTGATTTATGCCATCCAATCTCTTCACAGCAACCTGCTTATCACCAATATGTCCCTCAAAAACAGACCCAGATCCTCCAACCCCAATTCTCCTTGAGAAATCTCCAGTTGCTGATTTCAAACTCTCAAAACAAAATCTTTTGGGCAGCCCTGGCAATTGATCAATAATGTCTCTGTCTTGTGATAGTTTTGCACTCCGTCTTCTTATGACAATGAGCATGGAGACAATAACTGAAGCAACAAAAGTTGAAGAACCAACAACCACAATGCCCATTTTTCCTTTAGATAGCATAAAATTTCTAGAGT…
Seq_349665	Sobic.003G072100	FLS2	Arabidopsis thaliana FLS2 (FLAGELLIN-SENSITIVE 2); ATP binding / kinase/ protein binding / protein serine/threonine kinase/ transmembrane receptor > (FLS2) mRNA, complete cds.	Arabidopsis thaliana	GGACTTTGGGATCGCAAGGCTCCTCGACGGCGACAAGCTGAAGCAGACCATCACCCATGTCCGAGGCACGCTCGGGTACCTTGCGCCGGAGTGGTTCAGCAGCGAGAGGAAGGTGGACAGCAAGGTGGACATCTTCAGCTTCG
Seq_352684	Sobic.003G432400	Pi-ta	Oryza sativa (japonica cultivar-group) pi-ta protein (Pi-ta) gene, complete cds.	Oryza sativa	ACACTGAGGTGCTCCAGGCTTGCAAGGTGCTCAAAGGAGAACTCAAAACCCATATCAGATTCTGATTCTTCTGCGTTAAACTCAAGGTTAAATCTTTTGAGCATTGGCATTGCTTCCCTTTCACAAACCATCCTCAGCCCACCAATCCCTTTGGTCCGGAAAACAAACTCCTTCAGGCAACAGAATAGTTGCCTCCCGATGGTGAGCCTGTCACCGGGGGCTTCACTTGAAATCATACTGACGTAAAGCAGTGTGGGCATGCCTCCAAGTA
Seq_356023	Sobic.010G276200	Mlo	H.vulgare mRNA for Mlo protein.	Hordeum vulgare	AGGGCAAGACTACGAGTTCTCCAATGACCCGACGCGGTTCAGGTTCACCCACGAGACTTCCTTCGTGAGGAACCATATGAATGTGCTCAACAAGTTCCCAGCATCCTTCTACATCAGCAACTTCTTCCGGCAGTTCTTCAGATCCGTGAGGCAGGCAGACTACTCCGCGCTGCGCCACAGCTTTGTCAACGTGCATCTTGCCCCTGGCAGCAAGTTTGATTTCCAGAAGTACATCAAGCGATCACTGGAGGACGACTTCAAGGTGATCGTGGGGATCAGTCCTCCCCTCTGGGCTTCTGCTCTCATCTTCCTCTTCCTCAATGT
Seq_356934	Sobic.005G199800	Serk3A	Nicotiana benthamiana SERK3A (Serk3A) mRNA, complete cds.	Nicotiana benthamiana	AGCCCGCGCGCCGTGCCCACCGCCACCCGGTACCTCGCCTCCCACGGCATGGGCTCCGCACCGCCGCTGCCGTGGAGCATCCCGGAGAGGCAGCCGAGGCGGGAGAAGGGGAACACGAGGTGCTCCCCGCCGTCGACGCCCACGCCCACCAGCCTGGCTATGTTTGGGTGGCTCACGTTCACCACGTGGCCCAGCTCCGACAGGAAGCCCTCCATCCGGTCAGGCCCCTGCGCCGCCGTCAGCTTCTTCACTGCCACCAGCTCGCCGCCGGGGAGGCTGCCCCGGTACACCTTGGCGAACCCTCCTCTGCCCACCACGTTCTCTTTGCTGAAGTTGCGGGTGGCCTTCTTGAGCTCGGCGAGGGAGAAGGTGCGGAGGGTCGGCTTGAGAACGCAGAAC…
Seq_357164	Sobic.001G064700	xa21	Oryza sativa Indica Group Xa21 gene for receptor kinase-like protein, complete cds, cultivar:II you 8220.	Oryza sativa	GCTGACGGTGCTCAGAGTTCTCCGTCTTGCCAACAACAGCATCACCGGAACCATCCCTGCGTCGCTCGGGAACCTCTCCCGTCTGGAGGACCTGTCGCTAGCGATCAACCACATAGAGGGGCCGATCCCCCAAGGCATCGGGGGCAACCCACACCTCAGGAGCCTTCAGCTCTCCATGAACAACCTCTCAGGAGCGCTTCCTTCTTCCCTGTACAACCTGTCATCGCTCGAGCTATTTTCCATGGCGGAGAACGAGCTGCACGGTCGTCTCCCACAAGATTTTGGAACAACCCTTGGCAGCAGCATGCGGTTCTTTGCGCTTGGAGGTAACCGGTTGACCGGAGCCGTTCCCACATCTCTCACTAATCTCTCCAATCTCCAAATCTTTGACGTATCCGT…
Seq_368142	Sobic.003G147200	RFO1	Arabidopsis thaliana RFO1 (RESISTANCE TO FUSARIUM OXYSPORUM 1); kinase (RFO1) mRNA, complete cds.	Arabidopsis thaliana	AACCCCAAAGCTATATATGTCACTCTTCGATGTAAGAATCCCAGTCTGACTGTACAGAGGATCCAGGTAACCTATAGAACCAATGATATTTTTGGTTTGCTGGGCCCCATCAGAAGAAATCAATCTTGCTATTCCAAAAT
Seq_372102	Sobic.010G254100	Pto	Lycopersicon pimpinellifolium Rio Grande-PtoR protein kinase mRNA, complete cds.	Solanum pimpinellifolium	CTGTCGGACTTCGGGCTCGCCAAGGAGGGGCCAATGGGCGGCGAGACGCACGTGTCCACCAGGGTCATGGGCACCTACGGCTATGCCGCGCCGGAGTACATAGCCACCGGGCACCTGACGGTGATGAGCGACGTGTACGG
Seq_385132	Sobic.003G012400	Bs3	Capsicum annuum cultivar ECW-30R Bs3 (Bs3) gene, complete cds.	Capsicum annuum	TCAGCTCCATTGGGCCAATGCTAGGTCGAGGGATGCCGAGGCGTGCAGTGTCGCCTAGCACGAGCTGCGTGAGCACTAGGAGGATCTGGTCCACTGTCTGGACTGATAGACACATGAGAAGCCACATGGACAAACCAAAAGTGGAGAGTCCCATGATCTCTCTTGGAAGGACATGCACCGAGTCACGCACAACCATGGAGGTGTGCACATTATGGTTGGAGAGGTCAAGAGACAGCTCCATACCGGAGTTGCCGCAGCCGACGACGAGCACCTTCTTACCCCG
Seq_395727	Sobic.005G183400	PIB	Oryza sativa Japonica Group mRNA for Pib, complete cds.	Oryza sativa	CAACAGAATGGCAGTGCCAGCGTCTGATAACCAACTTCATGCAGGAATTACAGACCAACCCACGGTTTTACTGCTTACGCGGCCTACTCGCCTGGATGCATTCCCACTTTTCGTCTTGCCCTCCATCACTCAAGCGGTGCATGTTGTATCTCCTAATTTTTCCTCAAGGACAAGCCTTGGGACAGAAGCGTTTGGTGAGGCGGTGGATCGCAGAGGGCTACGCCAAGAACACGGAAAGCCATAGCTTATTGGACGAGGAGTACGCGGGCGAACTCTTCCACAAGCTTGCATCACAGGGGGG
Seq_39754	Sobic.001G313100	RPG1	Hordeum vulgare subsp. vulgare RPG1 (Rpg1) gene, Rpg1-Swiss Hv 489 allele, complete cds.	Hordeum vulgare	GATATAACCACTTCCATCTTTGTCGAAATATGTAAAGTCTTCCGTCAAATGTTCTTTGTGTTCTATTTTACTTAGGGGCACTGTTGCAGCAATAAACTCTTCCCAATTGATATTGATGTTGTTGTCATAATCATCCGCTTCCATGATATCACTAATCTCAATATTTTTAAACACTAAGCCACATTTCCTCAACCCTTCTTTAAGCTCAGCCAAAGTAATCGCACCACTGTTTCCATTGTCCACTGCCTTGAACATTCCTCTTAACCTACCAATCTCCTCTTCTGAAAGATGCTTAGCAAAAACCTGTAGAGCCAATTTCTTTGATTTATTCGCTGCAGATAATTTGTCGATACGAGAAAGAACAGTTGGATCTAGAGTTTGATGAGTAGCCACTCCATT…
Seq_39774	Sobic.001G444900	Pto	Lycopersicon pimpinellifolium Rio Grande-PtoR protein kinase mRNA, complete cds.	Solanum pimpinellifolium	CACGCGCCTTCCACCTCTTCGGCGAGGGGGGAGCGGCGGCACCTCTGCCTTGAATCCATCTGTTCATCAGAAGGTACCCCGGCCGATCCGATCTACTGGATCGGCCGCCAAACTGCATATCTCCACGGTGGTGCAAGGGAAGCCGGCCAACAAGATGATCTGCTGCGGTGGCGCGGAGGAGGATACGTACCCCGCACCTGCAAGCCGTCACCCAGCAGCACCTAGGAGTACGTCGCAACACAACGCAGCCCCAAAAAAAACACTGTTCCTCCTATGTCAGTTTGCTACGATGCCAGGCCGCGGCAAACCAAGAGGGCCTAATGCGCCCAGGAGTAGTGGGCCGCCGAAGGTCCTCCCCATCGATGTGCCGGCGATTTCCATGGGCGAGCTGAACAACAT…
Seq_40540	Sobic.003G364500	Pid2	Oryza sativa Indica Group cultivar Digu B-lectin receptor kinase (Pid2) gene, complete cds.	Oryza sativa Indica Group	AAGTGAAATAAATAAATAAATAACAACAACAATAATTATTCATTGTGCATCACCGCTTCGCTTGGTATGACCTACTACTACTACTAGCTCAATCGGATCGGACCCCAAACATGTCATCTCATTCAATCTTGAGTTGAGGAATTAAAGGTGAGGATTCCATGTAACAGCTGGGAGGGTCAGCTGGTAGCGCCGCCTCAACCTGAGCCCGTTGAGCGGTCTCCAGCATGTGCACCACCAGGTGCATGGTGGGCCGTAGCGCCGGGTTGGGCTCGATGCACCAAAGTGCCACGCGCGCGAAGCGCTCCACCCTTTCCGTTTCCTCCACATCGGTGTCGCCATCCAGCATGAGGTCGATCCGCCGTGCGCCCACCAGCTGCGCCGCCCACCCGAAGAGCGTGA…
Seq_40693	Sobic.006G227100	Hm1	Zea mays Helminthosporium carbonum susceptibility1 (hm1), mRNA.	Zea mays	GAGAAGGAGGCGTGCAGGTTCGCGCAGGAGCACGGCATCAGCCTGGTCACCGTCTGCCCCGTCCTCACCGTCGGCGCGGCACCTGCCTCAAAGATCCACACGAGCGTCCCCGCCAGCCTCTCTCTGCTATCCGGCGACGAAGCAGCGTTCGGCGTGCTCAAAGGCATCGAGATGGCCACGGGCTGCGTGTCGCTGGTTCACGTCGCCGACCTGTGCCGTGCCGAGATGTTCGTCGCCGAGGAGGACGCCGCCGCCGGGAGGTACGTCTGCTGCAGCGTCAACACCACCATCGTCGAGCTCGCCCGTTTCCTGGCGGACAAGTACCCGCAGTACACCGTGAAGACGGACATGCTCTCCGGCGAGGTCCTTGAGAAGCCGAGAGTGATCCTGTCGTCGGCG…
Seq_40831	Sobic.005G039200	RPG1	Solanum bulbocastanum putative disease resistant protein RGA2 gene, complete cds.	Solanum bulbocastanum	GAGGGATTATCCAGGCTGTGCAGCCTTCCACAATCATTGGGGTACCTCACCTCCCTCCAGAACCTCGTAATAGAATACTGCGATGCACTTGGCCAACTTCCTGATTGTGTTGGGGAACTTCGTTCTCTAGTTGTATTCAGGATCTGTGGCTTGCCGATCCTGACGTGCCTTCCCCAATCATTGGGGCGCCTCATCTCCCTCCAGGAGCTCGAAATAGGAAGCTGCAAGGCAATTGGCCAACTGCTCAAATCGCTGGGGGAACTCTGCTCTCTAAGGAAATTCGAGATATGGGCATTGCCGGGCCTGGCTTCTGTTCCTGAATCTATGTGCTGCCTCACCTCACTTGAAGAGCTTACGATCGCGGACTTCCCGAGCATCAGATCCTTGCCAAAGTGGACT…
Seq_40980	Sobic.008G166900	Pid2	Oryza sativa Indica Group cultivar Digu B-lectin receptor kinase (Pid2) gene, complete cds.	Oryza sativa Indica Group	GTCAATTGTGCGCATAGTTACAAAACATAAGTTGACAAGGGGTCAAAAGTACTCCCAACTTCCCAAGTCGATAAAATTCAGAGCAGATGATGGCGGTTCTCCGGCGGGAGATCAACGGCGACCCGGCCTTCAAGCATATCCACAACAGTCTGCATGGTGGGCCTCATCTCCCTCTGGCTCTGGATGCAACAGAGGCCTTGAGCACCGCCTTCACTGCCTCCTCGTCGTCGTCCACGGCCGCCATGGCGGCGTCCACGGCCTCCAAGACCTCGCCTCGCGCCACCTTCTCCCTCACGATGTACGGGAAGTAGTCGCGCGTGAAGTCTGGCGTCTCCAACGAGGGATACATGTTCCGGCGGCCACCAACGAGCTCGAGGAGCGTCATGCCGTAGCTGAACA…
Seq_41449	Sobic.003G342200	Hm1	Zea mays Helminthosporium carbonum susceptibility1 (hm1), mRNA.	Zea mays	GGGCAACGAAATGGCGGCAGCCGGGGACGGCGGCCTCCTCGTCTGCGTGACGGGCGCCAGCGGCTTCATTGGCTCCTGGCTCGTCCGCTGCCTCCTTGACCGCGGCTACACCGTCCACGCCACCGTGAAGAACCTCCAAGATGAGGGCGAGACGAAGCACTTGCAGGCCATGGGCGGCGCCGACACGCGTCTCCGGCTGTTCCAGATGGACCTCGTCGACCCTCCTTCCGTTCGGCCAGCGATCGAAGGCGCCCACGGCGTCTTCCACCTGGCGTCTCCTATGATACTGCAGGCAGAAGATCCGGAGAAGGAGCTGCTGGAACCTGCGGTGAAAGGCACGCTCAACGTTCTGCGTGCCGCGAAAGATTGTGGAGTCGGCCGCGTTGTGCTCATGTCGTC…
Seq_41610	Sobic.002G002400	Pid2	Oryza sativa Indica Group cultivar Digu B-lectin receptor kinase (Pid2) gene, complete cds.	Oryza sativa Indica Group	AGAAAGATGTGGCTCTAAACGTTGAAGACAACATGAATCTACTGTACTAGCTTATGCTAATACTTATACTGAAATGTTACGAGAGAAAAACACGTTCAGCTGAAAAGCAGCTCAAGCTGAACTTGCAGATTTGGACAGTAATGTCCGATGCTGGGAAGGAACTGGAAACTGAATATAAGTGTCGTGGGCCGAGTACGAGAGCCCAGCTCAATGAATTACAAGTGGGCCATCTTGTGGGCTTGCCAGGCCATCGAGACCTTCAGGACCCCGGCGGCAGGTGCAGGTCCGCAGTGGATGTCTTCTCCAGCATCTCCACGACCCTGCTCATCGTCGGCCGATCCTGCGGCGAGAGGCGGATGCACCAGAGGCCAACGATCACCAGCTTCCTCACCACCTCCA…
Seq_41700	Sobic.007G071100	Serk3A	Nicotiana benthamiana SERK3A (Serk3A) mRNA, complete cds.	Nicotiana benthamiana	GTGACTTGCCGACTTGCCACTCTGTCTCTGTGTGGCCAGCTGGCCGTGTCTCCCCAGCACCACCAACTCTGCAGGTCTCCGCAGTCCTCACCGGCGAGGGAACGCGCCGCGCCGTGACGCCGCGGTTCTTGGTCGCCGGCATTGAGGCCGGCAGCGCGCCAGCATCAGGAGCTCAGAGGTCATTCAATTCTGGGGGCATCAACTATATTCAATTTTTTTAAAAAATGGCCTGCTGTTTTATGTGTGGGACAGGCATGAAACAAAATACTGAAAATGAAGGAGGAAGCAAGGTGAAGATTTTTTCCTATCGTGAAATGAGGAAAGCTACACATGATTTTAGTGGGGCAAATAAGATCGGTGAGGGCGGTTTTGGCTCCGTTTTCAGGGGAAAGCTTAAAG…
Seq_41717	Sobic.003G151400	Pto	Lycopersicon pimpinellifolium Rio Grande-PtoR protein kinase mRNA, complete cds.	Solanum pimpinellifolium	GCCAAGTGCTGTATTTTTGCATTCCAAAAGAGACCAAACAGTTGGTATCATCCATCCATGATCCATCGCACGCCATTTTCTAGAACAGGTTGATGACAGGGCACACAAGCAGGGGACATCGCATACAAACAATGTACAGGACAAGCCACATACACAGCGGCATGGTGCAAAGCTCTTCTCGGCGCCAAGACTCAACAGTCATGACGCAGCAACGCAACGCAACGCTCCACAAGACGGTCTTCTTCCTGAGCCCAAAGTCGTCACGTCACACACAGGACCATGGCCATCGTTGGTGATGAGGAATCACAGTCCAGATCGCTCTGCTGCTGCAGCAGCGGGGGAGGCCGACGAGGCAGAAGGGCGGTTGCCAGGCCGGCTGTGCAGCAAGGGGTTCAGGGC…
Seq_417190	Sobic.007G154001	FLS2	Arabidopsis thaliana FLS2 (FLAGELLIN-SENSITIVE 2); ATP binding / kinase/ protein binding / protein serine/threonine kinase/ transmembrane receptor > (FLS2) mRNA, complete cds.	Arabidopsis thaliana	GTCCGCTCAGCTCATTGTGGGACAAGTCCAAACTTTCTATTGCACTCATGTTTGCAAGGGTCGGAGGAATTCGGCCGGTAAAGATGTTGCGTGACAAATTTAGAGATTTGACGTGACTCAAATTTCCCAACTCCCAAGGAATCTCTCCTGATAACATGTTTGCAGACAGGTCG
Seq_42265	Sobic.005G226400	Pi36	Oryza sativa (indica cultivar-group) CC-NBS-LRR Pi36 (Pi36) gene, complete cds.	Oryza sativa Indica Group	CACACAAACACACACACAGCTGCTTCACCAAAGTTCACTCCTATCCTGTACATCCACATCGCCTTAACCAAGCGCCAGTGACCATGGCGGACCTGGTGATGGGCGCCATGGGCAGCATCATCCCCAAGCTTGGCGAGCTGCTCAAGGAGGAGTACAGCCTGCAGACTGGCGTGAAGGACCGCATCCGCTCTCTCACGCGGGAGCTCGAGCTCGCGCAAGCCGCGCTCGGCAAGGTGGCTGAGGTGCCGTGGGACCAGCTCGATAAGCAGGTCCAGATCTGGGCACGCAATGTCCGGGAGGCCTCCTATGATATGGAGGACGTTCTCGACACCTTCCTCGTGCGTGTCAAAGGCCCGGAGTCTGCTGAGGAGAAGCAGAGCTTGCGGAAGTATCTCAAGA…
Seq_42300	Sobic.002G276400	Serk3A	Nicotiana benthamiana SERK3A (Serk3A) mRNA, complete cds.	Nicotiana benthamiana	CCTCAGCCCCACGTCGCGTCTTACAAGAGGCGTCGCAGCCTCCGATTCCCCGAGAGGCGGCAGTGGCACGGCACGCTCTTCTCCTGGCGCGGCTGTAGGTAACCGCGGCGCGAGAAGCTGCTCGCCTCGCGGAGCTAGCTGCTGTTATAGCCTGTGCCGGGGTGCGCGGGGGACATGAGCTGCCTGGGCTGGTTCAAGCGGAGGAGGTCCAGGAGCGGGGGATCGTCGTCGTCGTCGGGGAAGGCACGAGGGGCGTCGGCGCCGGTGTCGGTGTCGGGCCCCGCGACCACGATGACCACGACGACCGCCACGACGGCGTCGGCGGTGAGCACGAGCCGGTCGGACGACTCGGGCGCGGTGCGGCCGGTGAGCAAGTCGGCGGGGTCGGCCGGCTCGTCG…
Seq_42829	Sobic.001G390200	RFO1	Arabidopsis thaliana RFO1 (RESISTANCE TO FUSARIUM OXYSPORUM 1); kinase (RFO1) mRNA, complete cds.	Arabidopsis thaliana	GTGTCACAGGACGCCACGGAACCAGCCTGAATCCGCCCCTGCTAGCACTCAACATCATGCTCATAGCACGAAGAGGACAAAAGATAAAGTGTGTTCACCTCATACATCTATAAGTCATGTTTATTCTGAAGTAACACATCATATCATAGAACAAATTGAAGGGGGCTAAGCTTGAAGCCATCACCCTCTAATGTATCTCAATACCTCATTACTACACGCTACTACAGCCTTGATTGTGGTTTCCATTCCATCCAACTTCCTGACCGTAACATAAACTAAACAACACGCCAATAAGCTCATCCACAACAGCCTTCAAGACGGTTGTTTCATCGGGCTTACTCGCCATCAACAAATGAACCAAAGAACTTGCTTGCAAAACCGACTCTGCAATGGACACGG…
Seq_42968	Sobic.009G215100	RPG1	Arabidopsis thaliana RTM1 (RESTRICTED TEV MOVEMENT 1) (RTM1) mRNA, complete cds.	Arabidopsis thaliana	CAGCTATCCATCCCCACATCCTCCTGCGATTTTAAAAGAGCCACACCTTTTGTTTTGTTGTGCAGTTTCTTCAGTACCTCTCTGTCTATCTATAAGCACCCTTGCTCTTCAAGGAACTTTAGCTGCCTGCAAATCTTACCACTTGTGCAGCTCTTTGGAAGGAAACATGCAACCTCAGAGGAAGATGGTGGTGTCGAAGAAGCTGATGAAGGTTGGGCCATGGGGTGGCACGGGGGGACACCCGTGGGACGACGGCGGCCACTCTGGCATCCGCAGCATCACCATGTCTTACGATCGGTGCATGGAGTCCATCAGCGTGGAGTACGACAGGGACGGCCTGGCCGTCCCCGGCGAGCGGCACGGAGGCGCCGCCGCCAGCCACACGACTCAGATCAAACT…
Seq_433651	Sobic.010G146500	RPG1	Solanum bulbocastanum putative disease resistant protein RGA2 gene, complete cds.	Solanum bulbocastanum	AGTCTAGTGTCTGCAGAGAACGCAGCTTGTGGATGTTTTTAGGGACAGAGGCAATGCGTGTATCTCGCAGCCCAAGGTACCTCAAGTGAATCAAACTTCCAAT
Seq_43433	Sobic.009G008200	PEPR1	Arabidopsis thaliana PEPR1 (PEP1 RECEPTOR 1); ATP binding / kinase/ protein binding / protein serine/threonine kinase (PEPR1) mRNA, complete cds.	Arabidopsis thaliana	GAAAATAATTGCACTTTAAGTTTGTCATTGCAAGTTTGGAACAGCTCAAACACTGAAGTATATCCTTGGCAAGTCAAAGTACAAAAGAAACAAAAAAGAAAAAGAAAAATAAAGGGAGGCACTCCTTATGAACCATTAATTCAGGCACACAGCGGCATAGTGGTATCTGCAGATTTCATTTGGTGAGCAGAAACTTCATCTTGCCGTCAAAAACCTCCACTGTTTGATTACTATTTAGTGCTTGGTCAGTGAATTCAAAGACCTCCAGACAAGCACTTCCAGCTTCTCCATTATATCAAAAAGAACAATGAAAAAGGCTTCAGACTAACTTTTGCACAACAGAGATCCCCTTTTGCACAACAACGGCTGTAAACAACTCCTTGGTGTGAGTATGTATAA…
Seq_43721	Sobic.003G291000	Serk3A	Nicotiana benthamiana SERK3A (Serk3A) mRNA, complete cds.	Nicotiana benthamiana	CATCATTTCTGATAGTTACCCACAATTCTCAACTCTGCTACTATATACTAAATCCGTTCCAATTATAGTTCATTTGACTCTTTTGACCCCAAGTTTGACCACTCGTCTTATTCAAAAAATTTATGCAAACATAGTCAAATTTAAGTCATTCTTAAATAACTTTTATTAATAAACCAAGCCACGATAAAATAAGTAATATTTTACATAATTTTTTTAATAAGACGAGTGATCAAACTTGGTGTCTAAAAAGTCAAACGTCTTATAATTTTGGATGGATTGAGTACGTAGCTACATACTGTACCACCCACCAAGAAATATATTGCACTCTGGTAGGTTTCTCTCAGAACTCAAAAGAAACCTAAAAATCGCTCAACTGGACAAAGGACCAGTAATAAGATA…
Seq_44030	Sobic.003G370100	RFO1	Arabidopsis thaliana RFO1 (RESISTANCE TO FUSARIUM OXYSPORUM 1); kinase (RFO1) mRNA, complete cds.	Arabidopsis thaliana	CTCGCACACGCTGGCGCGGCTTGCCCCCACGCTGCGCTCCTACCACCACCACTATATAATCCCCGATCGCCTCACGCACACGCACCGACCCGCCGGCCGACGAGGCGCAACCGCCGCAACGCAAACCCACACGCCCCGCCACCGCCGCCGTATCGACCCGCTCCTCCTCCGCCCTGGTGTGAGCAGGCTACGGCAGCAGAGACCTGCTCCTGGACCGACGACCGAGGGAGAACGCGCGGGGCCGGGGTGCAGAGGCGGAGGAGGTACGTATGGACAAGTACGAGGCGGTGCGGGACATCGGGTCGGGGAACTTCGGGGTCGCGCGGCTGATGCGCAACCGCGAGACCCGAGAGCTCGTCGCCGTCAAGTGCATCGAGCGCGGCCACCGGATTGACGAGA…
Seq_44031	Sobic.009G149900	RFO1	Arabidopsis thaliana RFO1 (RESISTANCE TO FUSARIUM OXYSPORUM 1); kinase (RFO1) mRNA, complete cds.	Arabidopsis thaliana	CGACCGAGCCCGAGGAGACCACACCACACCGCCTCCTCCGCCCAGCCACCTGCGCCCGCCGATTCGTCGAGCTCGCCTCGCGCCCTCGCCCGCTCGCCTAGCTCCCCCTGCCTCTTCTTCCCTTCCTCCCCACCTCCTCCCCCGCGACCGTGCTCCTGCATGCCAGCGCGCTGACCGGCCGACGACGGGGTCGGGGTGGGCATCATGGACAAGTACGAGGCTGTTCGGGACATCGGGTCGGGCAACTTCGGGGTGGCGCGGTTGATGCGCAACCGCGAGACCCGAGGGCTCGTCGCCGTCAAGCTCATCGAGCGCGGCCACCGGATCGACGAGAATGTGTACCGCGAGATCGTCAACCACCGGTCGCTGCGGCACCCGAACATCATTCAGTTCATAGAG…
Seq_44248	Sobic.003G133800	Serk3A	Nicotiana benthamiana SERK3A (Serk3A) mRNA, complete cds.	Nicotiana benthamiana	CGAGCTCCTTGTCCCGACTCTCACTGTCACCACCAGTCACTGCCGCAGTGCTGCGCCCCCACCGCGCCACTTTCCCCACGCCCCTTCCCCTTCGCCGCCTCCTCCCGGGAGTCGAAACCCTAGCCAGCCAGCTCATGGCCGGGGCGGCGGCTGTGGCGCTGATGGTCGCGGCGGCGGTGCTGTCGCCTGCCTATGTGGTGTTGGCGTCCAACTCGGAGGGCGATGCGCTCTACGCCCTGCGGCGCGCGCTCGCGGACCCCCGAGGCGTGCTGCAGAGCTGGGACCCCACGCTCGTCAACCCCTGCACCTGGTTCCACGTCACCTGCAACCGCGACAACCGCGTCACCCGCGTGGATTTGGGTAACTCAAATTTGTCAGGCAGTCTTGTTCCTGAACTGG…
Seq_44350	Sobic.002G260900	RFO1	Arabidopsis thaliana RFO1 (RESISTANCE TO FUSARIUM OXYSPORUM 1); kinase (RFO1) mRNA, complete cds.	Arabidopsis thaliana	CTGAACCTGGCGCCTTAGACCGCTCGGCCACCTCTATTCAGAGCAGCAGGCAATAGGCAAAATATTACTGGCCAACTTGAGCGCTACAAAATCGGAATGAAAATATGTACACGATCGCTGTTGTATTATTTTCATCTAATCTGAAAAGCAGCTGACTAACTGCAAAGCACGTCCGGGGTGTAACAATAAAGGTTACCCCAGGGCCCATGTGCTATGCTAATCATGTCCCCGAGTTAGCTCATGGTCCTTGGATGAAAGCGCCATGAGAGCAACCACTACAGATCTCATGGTAGGCCTCATCCTGGGATCTTCATGCGTGCATGACTTTGCAAGGTACGCGATCTTCATAACCGAGTCAATGGGATAGTCACCTCCTAGCCTTGGATCAATCAGTTCCTG…
Seq_445112	Sobic.009G179000	Serk3A	Nicotiana benthamiana SERK3A (Serk3A) mRNA, complete cds.	Nicotiana benthamiana	GGCGTCGTCCCTGGAGCCGGTGGCGGCGAACAAGGACGGCGACGCGCTGGCGGCGCTGCGCAAGGGCCTTGAGGACCCCGACGGCAATCTCAAGAGCTGGGACCCGAGCTTGGTGAACCCG
Seq_44690	Sobic.010G115300	Serk3A	Nicotiana benthamiana SERK3A (Serk3A) mRNA, complete cds.	Nicotiana benthamiana	GTACAACATAGACGCCCATAACACACATACTATTGCAATTTTACACAAAGAAAACTTAAATAGATTTTTCAAGATGCAAAAAGGCATACTAAGCTATGGCAAAACGTAAGTGTTCTGCATAGCACGTAGTATAATTGGACGATCGCTGCTACATTCCCCGGGCCACTACAACAATGCTTTAGAAATTCACCCTCAGATATACGAATTTTCACCTTAACACAACTGCAGCCTACCCCCCAACTTCTGAGGCTAGCGAGGAATAATAAAAAAAAAACCATCCCTCCAAATTGTCGCTAACAATTCCAAAAGCTACCTTTCATATACACAAACAGCAATTAGACTGAATCTTGGCAATTCAGTGTTGAATTCTTTCATCGGAGTCGTGGAGTGGCTACCTTG…
Seq_44757	Sobic.007G163400	ER - Erecta	Arabidopsis thaliana ER (ERECTA) (ER) mRNA, complete cds.	Arabidopsis thaliana	TTTTGAACCTAATTAGTCAACGATTGGGCAATTATTACCAAATACAAACGAATGCTACAGTGATACTACAGTGAATTTTGGCACTCCAAATTTGAGAACTAAACACAGCCTATAATGCTTTGGCCCTATGCCAGCATGCATTGATTCCTACCGATCAAATTAAAACTTGTCTTTGTTTAATTTGTTTCCTTCTTCAAATTATACATAGAGATAGACATAGACCTTGCACTTCATAGCTACGGAATAGAACAGTAACTGGTCGGATTCTAAGCCGATGGTTTGCAGAGACAAGAGAAGTACTGGTGCTAGCAAGCATCAGGATTCAGGGAGGCGTATCACGACGGTCTCATGCATTCGGGACGGATGATCAGAATTCAGAACAAGGCCGATTGATAATCT…
Seq_44764	Sobic.009G125000	RFO1	Arabidopsis thaliana RFO1 (RESISTANCE TO FUSARIUM OXYSPORUM 1); kinase (RFO1) mRNA, complete cds.	Arabidopsis thaliana	AGTTGGCAGGTTCCACCCCCGACCCCAATCCTCGCGTCCCCCCGAAACCCTAGTGCATTGCAAAGCACCGGAAGCCATGGCGGTCGCGGAGCCGGGGCAGCTCAACCTCGACGAGTCGCCGTCATGGGGTTCCCGTAGCGTCGACTGCTTCGAGAAACTCGAGCAGATCGGGGAGGGCACCTACGGGCAAGTCTTCATGGCGAAGGAGACGGAGACGAAGGAAATCGTGGCGCTGAAGAAGATCCGAATGGACAACGAGCGGGAGGGCTTCCCTATCACGGCCATCCGCGAGATTAAAATCCTGAAGAAGCTGCACCACCAGAACGTCATCAATCTCAAAGAGATTGTCACTTCGCCAGGGCCAGAGAGAGATGAGCAGGGGAAGCAAATTGAGGGCAA…
Seq_454322	Sobic.005G214150	Cf-5	Lycopersicon esculentum disease resistance protein (Cf-5) gene, complete cds.	Solanum lycopersicum var. cerasiforme	GGTCGCCGCGCCCCCCCTTGGGTGGTGGTTCGCATCGACCTGCCGAACGCCGGCATCGACGGCCGCCTCGGTGAGCTCAACTTCTCGGCACTCCCGTTCCTCACACACATAGACCTCAGCTACAACAGCCTTCGTGGGAAAATCCCACAGGCCATTGCCTCCTTCCTACCAGTGCTCTCCTACCTTGATCTTAGCATCAACTGGCTCCATGGGCAGGTACCATCGGGTATTGGCAACATGAGACTTCTTCGCACTTTGATACTTGATTACAACAACCTCACAGGTCCTATCCCTGCATCCCTTGGCAACCTGACAGCTCTGGTTGTTCTTTCACTGGAGCAAAATATGGTCACTGGACCGATTCCGGAGGATCTTGGAAAGCTCATCAATCTAGAAGGT…
Seq_454494	Sobic.006G111450	Pto	Lycopersicon pimpinellifolium Rio Grande-PtoR protein kinase mRNA, complete cds.	Solanum pimpinellifolium	GGTATTATATACTGTTGAAAGCTGAAACAACACAGTATCAAATCCTAAAGGTACTGTGTTCAAATTGAAATGTGAAATGACACGGTATCAAATCTCAAGGCATATAAATACAGTTGAAGCAATATGGTATCAAATTCTCCCACCAATAGTGTTTCACTAAGGAGCCTACATTTGATGGCGTTATGCAATTTAGTCTTCATCTTCTTCAAATGAAATAGGACAGGATCACTCCCATCCACATATCCAACAAATCCATCAACATCAGGCTGAACAGCAGTAAAAAAACAACAGACAGTTGAAGAAGACAAAGTGTGCCTCTCTCGCCCATGCCTTTCTACTTGATCTTTCAAGCATTGAGCTCCTCAAAATTTATCAGCAGGATATGAAGCGTTGCTAGGA…
Seq_454768	Sobic.006G272500	ER - Erecta	Arabidopsis thaliana ER (ERECTA) (ER) mRNA, complete cds.	Arabidopsis thaliana	GTCACAAAGTTCGCCATCAGACATTCAGACAGGCAACATACCAAAGCCTCCCGCACATCAGCTATAAACCCTACGAAGTATGCCCGTATTACACCAGTTCAGTTACACAAGCACCACCAGTCAAGGGAATCAGTGTCTCAAGCAAGCATGTCCGGAACCGAACCGAGCAGGGCGCCTGCCCGCCCGTCCGGTCCGCCGCTTGCCTGCCTCTCTAGAGTCCTGTCTATACGCCAAGCAGACAACATCAGCGCCCGCGACCGAGAATGTTAGCAGCAGCCGTGCGCAGCGATGGATTTACACGGTGGTGTGGAGGGGGGAGCGGGGCGTGTCAGTGTCACAAGGCGAGGGCGAGCTCGGCCCACGCCAACGATGACTCCTTGAGGATGGCGGCAGCCGACA…
Seq_455339	Sobic.003G100200	Cf-5	Lycopersicon esculentum disease resistance protein (Cf-5) gene, complete cds.	Solanum lycopersicum var. cerasiforme	TGGAGTACAACTGAGCGTGAGAGCACAATGCAACGCTCTTGATTAGATAGATAGATATCCACTTCGTGTTGTAACATAACACCACAGGGCAACACAGGCTAATTACACACAAAAAACACACCCCGGAGAAGCTACCCTATCCAGCTATCCACCACCACTACACATCTTCAGTCCACAAGAACTCACTTCATAGTAGTTACTCCTCTACTGTAATCTGGCTCACAGCCACCACCCAGATTCATGTTTCCTTCTCTTTTTTCCCCATCTGATGATGAGCACAGCAGAAGCAAAGCCACCAGCCAAAAAATCACCAAAAGATCAGAGAACACGCAGAAACTAGTTCGTGCTAACCTACCTAGTACTACAAGTTTCTCCATGTTCTTCTTCCATACCACCAAG…
Seq_455368	Sobic.002G062800	Pikm2-TS	Oryza sativa Japonica Group Pikm2-TS mRNA for NBS-LRR class disease resistance protein, complete cds.	Oryza sativa Japonica Group	CTGAGAGAGGCCAAGGAAAGAGATTGCAGTATTGAAGAGTGTAGAGAAGGAGAAGATGGAGCTTGTGGTGGGTGCTTCGGAGGCCACCATGAAATCTCTGCTGGGCAAGCTGGGTGGCCTCCTTGCCCAGGAGTACACTCTGATCCGTGGCGTAAGAGGTGACATTCAGTACATCACCGACGAGCTCGCCACCATGCAGGCCTTCCTTGGTGACCTCGGCTCCACCCCAGACGACCACGACCGCCGGCTCAAGAACTGGATGAAGCAGATCCGTGACATGGCATATGACATGGAAGACTGCATCGACGACTTCGCCCACCGCCTACCTAACGATCCCCTCAGCGATAGAACATGCTCCTTCATAGTGACGAGAATCTACGAGCTGTGGACATTTTGGCC…
Seq_455417	Sobic.007G216001	RFO1	Arabidopsis thaliana RFO1 (RESISTANCE TO FUSARIUM OXYSPORUM 1); kinase (RFO1) mRNA, complete cds.	Arabidopsis thaliana	GTTGGAAGCTAAGAACAAACAACAAATGTTCACAATCTTGGAGAAGAGAGGGTTGGCAATGAGCAGGAGAGTGGCGCTACTCGCGGCTGTCGCTGTTGTTGCATCGGTGGTGCTTCCACGGCCGCCGTCAGCAGCGGCGGCGGCGGCCGATGTAACGTTGCCGGGCTGCACCAGCAAGTGCGGGAACATCAGCATCTCACACCCGTTCGGGGTGGAGCCCGGCTGCTACCTCCCCGGCTTCAACGTCACCTGTAGGAACGACAGCTCGGTCGGGCACGATGGCTCGCCCAAGCTGTTCCTCGGCGACGGCACGGTGGAGCTGCTGGAGATCTCCATCCCCAGCAACACAGTGCGCATCAACGCCAGCTTGGCCTACTTCCCTGGCAGTGCTGGTCACAA…
Seq_45566	Sobic.001G534532	RFO1	Arabidopsis thaliana RFO1 (RESISTANCE TO FUSARIUM OXYSPORUM 1); kinase (RFO1) mRNA, complete cds.	Arabidopsis thaliana	CGAAGCTGTACACGTCGCTCTTCTTGGTGACCACGCCGGAGCGGAGGTAGTGCGGGTCCACGTAGCCCGGGGAACCCAGCACGGCGCGCACCCGCGGGCGCTGGCCAGGGCCGGGGCGGGCGACGACGGCCGCCGAGAACCCCGCGCGCGCCGATCCGAAGTCGCACAGCCTGGCGCCCATGCCCGCGTCCAGCAGCACGTTGGACGCCTTCACGTCGCCGTGGACCACCTGCGGCTCGCACCGCTCGTGGAGGTACTCCAGCGCGCGGGCCACCTGCAGCGCCACCGACACCCGCCGCGCCCACGGCATCGTCCCCACGGCCTTGCCCCCGCCGTGGAGCCGCTCGTGCAGGTTCCCGTTCGGCGCGAACTCCAGCACCAGCACGCCTTCCTCTTGCT…
Seq_45567	Sobic.001G497300	Pid2	Oryza sativa Indica Group cultivar Digu B-lectin receptor kinase (Pid2) gene, complete cds.	Oryza sativa Indica Group	CCTAAATTCACGTGTCCTGATTGTACAGAGTCCAACTTCGAAATATGCTGTCTTTTTTTAGCAGCATGACAAAAAAAAATCCACTTAACATAGCCAGGCACTTCACAATGAACACAAAGAGCTCTCACTGCTTTCCAGAGGGCTCGCACCCGGTTGGCCAGTTGGCCAGTTGCTACACATTGAATCACTTCTTCCGATTGCTGTTTGATGGGCTGACTCTATACATACCCTACTGTGGAGTACTTGTCGCGGCGGCAGAGTGTCTACCACCTGGGGCGCTCAATCTACAAGGTGCGCCAGCATTTGCCAAATTTTGGACAAATACAAACAGCAAAAGAATAAAAACTATGCACAACGGGAAGTCGAAAGCCCCCCTAAGGAGTCAAGTTCACTGAGATT…
Seq_455755	Sobic.003G034600	RFO1	Arabidopsis thaliana RFO1 (RESISTANCE TO FUSARIUM OXYSPORUM 1); kinase (RFO1) mRNA, complete cds.	Arabidopsis thaliana	TCACTTAATCTTAGAGTTACTTTTTTGTGTACTTTTTACTCAAACACAACAATACAACTGTGTGCCATTAGAATAAAGAAGATGAACGCTTGCCCATGCAAACCCATGTGGAACACACTGCACACAGCACACCCCAATACAGACACACCACCAAATAGAACACTAAAACACATCCAGCAAGGCCCGGTTCATGAGCTGATTCCTCGTGGCATTCCATGTGTCTGTGCACTCCCCTCGAATTGGGGAGAGTGGAGGAGAGGATCAGAGGAGGCAGCCTTCAGGCAGTGGTGGTTCTACCCTCTGTACACGCCGGAAGGGTCGGCGTTCTGGACGATCCACGGGTGCTCAAGAACCTTGTGGAGTGGCAGCCGTTGCGCCGAGTTCTTGACCAGCATTTGA…
Seq_45621	Sobic.003G268700	RPG1	Hordeum vulgare subsp. vulgare RPG1 (Rpg1) gene, Rpg1-Swiss Hv 489 allele, complete cds.	Hordeum vulgare	TTTTTTTTGTGGGAACCCATAACTTTATTGCATTAATGACTAGATTACAAGGCACTAACTGACACGAGAGTGCTACATGACAGTGCGAACTCAAATCGTGTTTCTCCTGACGCTCAACTGAAGCATCCGCGGCTGCTGGAACATCATGGCCACCGAACGGCACGTCGTCTGCTTCCAGTTCATCATCCCTGCGGGGGAGGCCGAGGCCGCCGCTGCCGCCGCCGACAGCCATCTCCCCAGCTGGCACCGGCAGGGCGTTGGACACTCTGCCTGGCGCGCAGCGCGCCACCTGGACCGCGGCGCAAGCCTCCTTGACCTGCTGCTGCTCGCCGACGCCGAGCACGTCGATCCATCCGTCCTCCTCGCTGTCCCAGTCGGGCAAGGCGCAGGCGGAGGACG…
Seq_457132	Sobic.005G212100	Pm3	Triticum aestivum powdery mildew resistance protein PM3b (Pm3) gene, Pm3-b allele, complete cds.	Triticum aestivum	TTTGTCTTGGTGAAATCCCTAGGATCACTGCCAAAAACAACCACTTTTCAGTCGATGTACTGCTGCTCATCCTCCATTCTCTGGATTTGTGTATCTGTTGCAATCAGAAGACAGATCGATTGAGTTGAAGAGACGGAGGTGATAAATGGACTCATCAGTGATATGATGATCCCTCCATCAGAACCGTTGGAATCCAGATGGTGCAGCAGATGATTTTCTTGAAGTAATTCGTAACAGTACTCACCAGGAGGATATTGAGGACACATCAGCTGGGAATAAGCACCCATCCAGTCCTCTGCACTACCCCCACACCATTTGATTCTGCTAATCCGGTTGTGTTCCTGAGCAACATACAATGGCCGAGTTGGTGATCGGGCCGCTGCTGTCCATGGTGAAGGA…
Seq_457773	Sobic.002G179900	Lr34	Triticum aestivum chromosome 4 clone BAC ABCT5; BAC ABCT33 map 4A, *** SEQUENCING IN PROGRESS ***, 7 ordered pieces.	Triticum aestivum	CACACATACATGAAAACAAATATGAACAACTGGACAATTATTCTATTCTGCAATTGCAGTATCAAGAATGTATTTCTGTACAACCATGTAAACCAAGCATATGGAGCGTATTTTCCAAAGAATGGTTATCACTAATGAAAATACCTACAAAACCACAAGATTCTCTATGCAGTCCCATCCAATAACTGGGGTCCCTTGCTGGCTATGAAGCTAGTCTTAAAGGTATTATTTACGCGAACTCGTTGAACACTTGTGCTCCTCTGGCGACCTTGATGAAGACATCCTCTAAGGTAGTGTCAACCAGTCCCCAGGCATGTATCGTGAGCCGGCGCTTCGCTTTCTCGACCACGTCAAAAACATGGGCTATTTTCACCTCTTGCTTTGGCAGCTCGAACTTCT…
Seq_457927	Sobic.002G120300	Bs3-E	Capsicum annuum cultivar ECW Bs3-E (Bs3-E) gene, complete cds.	Capsicum annuum	TGACAGGCTTGGTGAATCATCCCGGGGCCAAAGAGGACGAAAAGGCTGCCTGCTGCTGCCGCCGCCGCTGTTGCAGTTGCAGATCACACGACCTTTCTGCATCCAGCCATCCACCCTCTGTCCTCTCTCTCTCACCCTCTCCCTCTCCCTCTCACTCACTTTGTTTCACCCATCCGTCTCTCTCATCTCACATACATACTCGAATACTCGATCCATCCATCCATCCATCACATACAGAGAGAGGAACAGATACTAGTCTACAAGTAGCTAGCGAGCTAGACTAGCTAGTGACCGATCACTCCATCGATGGCAGCAGAAGCAGACGCATCAGCAACGCCGCCGGCGGCGAGCCGGGTGGTGTGGGTGAACGGGCCGATCGTGGTGGGCGCGGGGCCAGCG…
Seq_457931	Sobic.003G174700	Xa26	Oryza sativa (japonica cultivar-group) bacterial blight resistance protein XA26 (Xa26) gene, complete cds.	Oryza sativa Japonica Group	TTCTCCTAAGAAAATGCCCAAAAAGATACATATAACAGAGAGCCAGCACACATATGGTTGAACTAATTCATATCCCCACAATATTAAGTAAGCACGTGAAAGTACCACCTCTCAAGTCTCAACAGCAAACTAATTACCTTAGCTAGCTAGTACAGTAGTACGGTAGTGCCTAACACGTTAACAACCCAGTAGCCCAGTACAATCTGTGGCCACTAGGGAAATGATAATTTTACACGGTGGAGTACACTAAGGCAGCTTCATGCCCTCTCCTCCTGAGCTTCGGTCCCACAACTGAGTTCTAGAACACAACCGTCCCATTCCACCGAAAAACACAATTTTATCAGGGGAACACTTCGCTAGCTTGAACCATTGAGGCGCTCCAAGGTCTCCGCAACATGC…
Seq_458055	Sobic.003G432000	ER - Erecta	Arabidopsis thaliana ER (ERECTA) (ER) mRNA, complete cds.	Arabidopsis thaliana	GCCAAATTGGCACGTACGCACACAGTACAGTAGAGCCGAATGAGTGAACATGCATGGAAAAGAAGATGGAGCTACAACCTGCCCTACTATAGTTGCTATGCTACATAGTACTTGCAGGCTGCCAGGCCAGGGATGCGAGATGCCGTTGCTTGCATGGCAACATGCCCAACGAACACGGCCGGACGTCGGTTGGTTGCTTGGCCGTGACTCGTGACTGACAGTCAGGATGGATCAGAAGGAGGAGGCTTCCATTCTGCCGCCGCCCACGGGCGCCTTGATGACCTGCAGGATCTGGACCACCTCCGCCATGGACGGCCGGTTGGACGGGATCTGCGACGTGCACACCATGCCCAGCTTCAGCACCGGCAGCACCTCCTCCTCCGGGACGTGCCCGCCCAT…
Seq_45810	Sobic.002G027600	ER - Erecta	Arabidopsis thaliana ER (ERECTA) (ER) mRNA, complete cds.	Arabidopsis thaliana	GGAAAATTTTAGTATCTAAACAAGGCCGCAGTACAACATACGAATGCCGAGATGCTCACCTTAACATTAACACAAGTACAGTGTGCAGAAGAACTTGATTGCTCCAGAATCCTAGGCTTTAGGCTCCCCTAACTCCCTAAATGGTTCTTCAAAGCAAAATGGAGATCAGGAGGCTTGATATGAACACAACAGTGTCCTAAAAGGCTATGATGCATACCACACCAGAAATTCCGGGGCCTAGATTTCACACACACCCTACAGCCTACCCAAATGCAGATGGATAAACACAAGATTTATGAATCTCACACCACCCTAATTAAGAGCAGAGACCTAAAACACCAGGCCCTAAGCTAGAAATATCCAAACATCCGAATTTCACCAGGAGAAGGAAACATAGGA…
Seq_45857	Sobic.007G054500	Lr34	Triticum aestivum chromosome 4 clone BAC ABCT5; BAC ABCT33 map 4A, *** SEQUENCING IN PROGRESS ***, 7 ordered pieces.	Triticum aestivum	CTCTCTGCTACCTTAGCTACCACGGCCTCCTCCTCACGGTAGCTCCCTCTCCCTCAGCAGCAGCGCATGCCACCTCGATCCCCAGCCAGTCCCCATCCCGTGCTCTAGCTACCTGCTGCCGTGTCTTGTGCTTCGTTCGAGCCTAGCTGCCACGCAATGCCTCCTAACGCCCACCAGGACGTGCGCGGAAGCAGCGCCGGCGGCCTCGCCATGACCATGACGTCCCCTCCTCCGGCCACGGCCACGGCGGCGGCGGCGTCCAAGATGGACTGCTTCTTGACCACCGTCTGCACGCCGCTCCACATCCAGTTCGTCGACGTGTCGTACCGCGTCAAGCAGACGGAGCGGTCAGCGTCGTCATCCTCTAAGGCGCCACCACCCGGCGGCCGGATATCAGCG…
Seq_458623	Sobic.008G022300	RFO1	Arabidopsis thaliana RFO1 (RESISTANCE TO FUSARIUM OXYSPORUM 1); kinase (RFO1) mRNA, complete cds.	Arabidopsis thaliana	GTTTTCTGGTGATTAGTTCCAAGAGCACAATTCCGAAAGAGTAAACATCACTCTTTGATGTGAAGTGACCAGTCTTCACGTAAACTGGGTCAATGTAGCTCATGTCGCAACTCGGGCGAAATTCACATCCATTATTACTCATCAGGAGCCCAGGTAAAATATCCGAGACCTTTGGCAGAAAATCGTGATCCAGCAGTATTTTTGAAGATGTGACATTGCCAAACAGGATTTGGGTGGAGTGCAAATATTCTAATGCCTCTGCAGAGCCAATTGCAATACCTAGGCGTAAATCCAGTGAGAGAGTACCTTTACAACAATGCAGATGGTCGTGCAGACTCCCTTGGTGAGCATACTCGTATACCAAGTGACTAGGTTCAGTCTTCAAGCAATATCCCAATA…
Seq_458651	Sobic.003G314200	Serk3A	Nicotiana benthamiana SERK3A (Serk3A) mRNA, complete cds.	Nicotiana benthamiana	CTCAACCACCATGGCCACGCCATCTCTTATCCGCCTCCTCGTCCTCCTCACCGTAGGCGCCGCCGTCTCGCAGGTGGCCGCATGGGTGGACTGCGGCGACGCCTCGCCGTCGCCTCCTCCTTCGTCCTCCCCTTCCCCGTCACCACTATCGACGCCCACCAACGGCAGCAGCAACGCGCCGTTCCGCGCGAACCTCCTCACGCTCCTGGGCGCGCTCCCGCGCGCCGCGGCGCCCACGGGGTTCGCGTCCCTCTCCCTCGGGGCCGGCCGCGACCGCGCCTTCGTCCGGGGCCTCTGCCGTGGGGACTTCCAGCCTCCCCGGTGCCTCACGGACCTGCAGGAGGCCGTGCGCACCCTCGGCGAGAGCTGCCCCAGCAGCCGCCGCGCCGCCGCGTGGCT…
Seq_458652	Sobic.003G314200	Serk3B	Nicotiana benthamiana SERK3B (Serk3B) mRNA, complete cds.	Nicotiana benthamiana	CTCAACCACCATGGCCACGCCATCTCTTATCCGCCTCCTCGTCCTCCTCACCGTAGGCGCCGCCGTCTCGCAGGTGGCCGCATGGGTGGACTGCGGCGACGCCTCGCCGTCGCCTCCTCCTTCGTCCTCCCCTTCCCCGTCACCACTATCGACGCCCACCAACGGCAGCAGCAACGCGCCGTTCCGCGCGAACCTCCTCACGCTCCTGGGCGCGCTCCCGCGCGCCGCGGCGCCCACGGGGTTCGCGTCCCTCTCCCTCGGGGCCGGCCGCGACCGCGCCTTCGTCCGGGGCCTCTGCCGTGGGGACTTCCAGCCTCCCCGGTGCCTCACGGACCTGCAGGAGGCCGTGCGCACCCTCGGCGAGAGCTGCCCCAGCAGCCGCCGCGCCGCCGCGTGGCT…
Seq_458665	Sobic.005G218400	Pikm2-TS	Oryza sativa Japonica Group Pikm2-TS mRNA for NBS-LRR class disease resistance protein, complete cds.	Oryza sativa Japonica Group	GTCCCTTCGAGGGTCCTTCCTTGATATAGAAACAAGGACCCAACAAACTTCACATATCATCAACACTGTAATAGCAATAACCAAACATTACAGCAATATTAAACTTAGCAGAGCAAAAACCAACGCAACAACATATATGAGTGCCATGGGATGTAGATGCATACTACAACATCCCTATTTATTTTCAGACAACCAATGCAAGAACCGTAACAATATATATAAACTCGATGGCGAAGATCGAGGTTCTGAGAACGATTGGTTGGTGCGGTAGCACCAATATCTTTCGACCTTTCAAGAAGTGAATGTGTGATCAATGATTACCTTCAGTCCCTCAGTGCTATCTTTCAAATCTCGTACCAACAGGTCGTTTATTTGAGCGGTTTGCTTATCCTCTTCTCT…
Seq_459076	Sobic.002G251200	Hm1	Zea mays Helminthosporium carbonum susceptibility1 (hm1), mRNA.	Zea mays	GCGTGACATGACATTTTATTCATGTACTGTAGTCGTAGAACCCGTGAGCTATGATCTTTTTTCTTTGTAAAGATTCCGTGAGCGATGAACTGACAGCAGCAGTTCACGCAAGGACGCTGACATGACATGGAATTATTGAAACAAATTGACAGGGAGCCAGCGAGTTCTGTTCTTGTCGGGGACAAGATCTCTTTCTCCCTCGATCTTCATCACAGGGGGCACTCCAGCAGGTGGCCCTGATCTTTGAGCGACTGGACACAGTCGTCGAACATCTCCTGCACTCCTCCGAACTTGATGCCCAGCCCCTGCAGCTTCGACGTGTTCAGCTGATACGACTGCTTGCCGTAAGGGCTGTTCAGTCTCCGGGGTATGGGGAATATCGGGTATCGTTTTGCAAGC…
Seq_459090	Sobic.001G294400	RFO1	Arabidopsis thaliana RFO1 (RESISTANCE TO FUSARIUM OXYSPORUM 1); kinase (RFO1) mRNA, complete cds.	Arabidopsis thaliana	GCATGGTATATTTTTTTTTCTTCAATGCGCAAAAGTGTTGTGTATATAGAAGAGTTTGGAAACAAGTATGGCCGGTAAATCAACCACCAGCCACGAGATGGCCGAAATTACTCGGCAAAAATACAACCATGAGCAGCTAAACAGCGTATGGTACATCTTTATTTACTCACTTATATTTATGTATTGTCACTGCATGCTAGTTGATCCGTACAAGGCAATCTGCAATTGTACAGCGCTATACAAACTTATTATACAGAGTGGAATGCAACATCCCTTATCACACGCACGGGTTAGGCTCGGCGGCGCCATATCTGCAGCACAAAGGACTCGACGCCATGAGTGAGCAGCTGCTGAGCTGCCTGCAGGAGCGATCAGTAGGTGTCATCAGCGTCTGCCTCT…
Seq_459179	Sobic.004G326100	Cf-5	Lycopersicon esculentum disease resistance protein (Cf-5) gene, complete cds.	Solanum lycopersicum var. cerasiforme	CAGAGATATAGAAATAGAAATAGAAAAGAGAAAAGGATCGAAGTAGCGCTGCATCGGAGGGAGCAAGACCAGTTGTTACAGACAAATATTCCTCAGCACAAGTCCAACTGTCACTCTGCCAAACAGTAAATAAAGGCAAAAAAAAGTAAAACACAACCAGAAAAAATCATTAGTTATTAAAAACTACAGCAATTTCGGTCTCCAATTAGATTAGAAGATCCACTACTGACACAACCACCAGTCCACCCTGCAGCAAGATGTCTGCTATGCTCCTCGGATCCCGTTCCAGAATCCAATCTTGGCTTCAAGAATCCAACCAAAATCTCGTGTTCAGTTCAATTACGAGGAATTATATGTCCAAAGATGCAACCTTTGAATGGATTCAGTAGTCCGGCATGA…
Seq_459262	Sobic.003G419600	Pi5-1	Oryza sativa Japonica Group Pi5-1 (Pi5-1) gene, complete cds.	Oryza sativa Japonica Group	CATGATGCATTCACTTGTTCTGGACTTTTGGTACGAAGTTTGGAAGGCTGTAGTTGATTTAGCTTTAGAGCAGGAAGCCAGGAGGTTCAGAGATCCTCTGCTTACATCGAAAGCAAGAGTACAGAGTGAAACCTGAAACCTATCCTATCCAGGCTCCTTTGCCAAAGCAACACGCTGAAAATTTAACAGCACATGGCGCATCTTGCATTGCATCCTGGCAAGTATATTGCATTTTGTATTTCTGCATACTAGTGTGGACCGTCCACCCCTCCGAGGCTACTAGGTTCCATCAGGATGACGCCTTGCCGGCATCCGCATGCTGAGCACGGTGACGCGCACACCTGCTGTAGTGGAGTAGCTGGTTGAGACACAGACTAATTCACCTGGACAGAACCCGCC…
Seq_459441	Sobic.006G227800	Hm1	Zea mays Helminthosporium carbonum susceptibility1 (hm1), mRNA.	Zea mays	GCGCGCTTTGTAATAAGGGGATTAAAAAGATATTCATGACAGACAAGACGCCGACGGGAACGACGATATATGCCACAAATCATTTGGTGATCCCGTCACGTGATGAAGAACAGGTAGAAGGAATTAAATTAAAAGGCAGGGACAGCTATCAGTAGCGGAGAAGAATCCCCAGTGCGTTGCCGTACTCGATCACGTCCCCGTATATTGCATCCAGGGTGTTGTACCTGAACTGGAACCCCTCCTTCACCAGCTTCGCGGATGACAGGCTCACTCTCGGCTTCTCCAGGAGCTCATCGTCACCGGACTGATTTATGTTCACGTGGTACTGCGGGTACTTGTCTGCCAGGAAGCGGGCGATCTCGACGACGGTCGTGCTGACGCTGCTGCAGATGTACCTCC…
Seq_459498	Sobic.009G066200	Cf-5	Lycopersicon esculentum disease resistance protein (Cf-5) gene, complete cds.	Solanum lycopersicum var. cerasiforme	CTGTGACACAAAAAAGAAAGAATAGTTAAGTAGGGTACATTCCTTGGTCTGAAAACTTATCTCTGAATGAACTCTCAACTGAAAGCAGCAGCTTAACTGAACAACTCAAGCTTTAATTCCCTCTATACATCCCAGTCCCAGGTGCGCGCGGCCAAGTCACCAACCAATCCTCCTCATCCTCGTAATAACCTGTCTCTCTCAAGCAGTTTATTATTCACAACCCAATTAGCAATCAATCCAAGCTTCAAACAAATTGTTCCCTCCAGCACCCCCACCTCCAATCCTTTTCACCATCGCCATGACGCAAACCCCGATCTACGCGAAAAACAGAGACCGACCAATGCAAAAGCAAGAGCGATATATGCACCTTATAATAACAATAATAATAATCTTCTATAT…
Seq_459526	Sobic.008G074500	Cf-2	Lycopersicon pimpinellifolium leucine rich repeat protein Cf-2.1 gene, complete cds.	Solanum pimpinellifolium	GTCGGCGAGCTCGTGGAGGTAGGCGATGCCCTTGGCGGCGCCGAGCACGACGCGGAGCCGCCGCCGCCAGTCGAGGCGCACGCCGGACTTGCCCGTGAGGCTCTCCTTGAGCGTGCCGTTGGGGACGTACTCGTAGACGAGGATCTGCTCTTGCTGGTCCAGGCAGAAGCCCACGAGGCTGACCACGTTCTTGTGGTGGACACGGGAGAGCAGCTCGATCTCCGTCCTGAACTCCAGGCTCCCCTGCAGGGACCCCTGCTGCGACCTCTTCACCGCCACCAGCTGCCCGCTCGGCAGCGTCCCCCTGTACACCTTCCCGTACCCGCCGTTGCCGATGTCGTTCGCCTCCGAGAAGTTGTTGGTGATCTTCCGAAGCTCGTCGAAGTTGAACATCCGCGC…
Seq_45960	Sobic.004G128200	Serk3B	Nicotiana benthamiana SERK3B (Serk3B) mRNA, complete cds.	Nicotiana benthamiana	GCGGTCAGCTTTCAGATTGGAACAAAAATCAAGTTAACCCTTGCACATGGAATTCTGTTATTTGTGACAATAACAACAATGTTATTCAAGTAACTTTGGCTGCACGAGGATTCACTGGTGTTTTGTCACCAAGAATTGGAGAACTCCAATATTTGAGTGTCCTGTCATTGGCTGGTAACAGGATTACCGGTACCATACCAGAGGAGTTTGGTAATCTATCTAGCTTGACAAGCTTAGATTTAGAGGACAATCTTTTAGTTGGAGAAGTACCAGCTTCTCTTGGCAACCTTTCTAAGCTAACACTGTTGATACTGAGTAAAAATAATTTCAATGGGTCAATTCCTGATAGCATAGCGAACATTTCAAGCTTGACAGACATCCGCCTGGCATATAATAATT…
Seq_459803	Sobic.008G189400	Pi5-1	Oryza sativa Japonica Group Pi5-1 (Pi5-1) gene, complete cds.	Oryza sativa Japonica Group	GTTCGCATCCGGCATTCCGGCGCCCGGCGTCCGTCCATGGCTTTAGCTGGAGTCGGGGAGGCGCTCGCGTCCGTAGTGCTCAAGGAGGTGTCGCGCAAGCTGGGATCTGCCATCGGGCAGCAGATCAAGGCGCGATGGAATCTGGAGCGAGACATGGAGGAAATCAAGAGCACGCTAGGGATGGTGCAAGCAGTACTGAGGGATGCCGAGAGGCGATCCGTCAGGGAGGAAGCGGTCAACCTTTGGCTTAAGATGCTCAAGGACGCCGCCTACGACATCTCCGACATGTTCGATGAATTTGAAGACAAATTGTCAAAGGGGAAGATATCTAGCTCTGTTGCCAAGTTTACTATGGGTAAAAAGCTGAGGAAAATGAGAGAGAAGTTAACAAACATAGTA…
Seq_459985	Sobic.010G208800	Pid2	Oryza sativa Indica Group cultivar Digu B-lectin receptor kinase (Pid2) gene, complete cds.	Oryza sativa Indica Group	TAATGATTACCCTAGGCTGTTGTAAAAAAAAATGAGTACCCTAGGCCATGTTTGGTTATCAGAAGAATGTTCATGGGATCTAAACATGCCCTAATATTTATCGGCCTTCTACCGTTGATAGGCTCACGTGATTAGCAGAGTGTTCCGAGTCTCCTCTTGTTGATAGGGCTTCATAATATCTCTGCGCAAAAAATAATGGCTGCCTGGGCATTGGGCGTGGCATGGCCTCATTATTCAACATGGATACAACTAACGACATCAGTGGCCTGTCATTTGGGCTGTCTTGAACACACAACAGCCCAATATGGATGCATTGCAAGGCTTCATCAAGCGAGCAGCCCTCCACAATCATTTTGTCTACGAAATCCCTTGCCATTCCATCTTTCCATAAGTTCCATG…
Seq_460062	Sobic.010G210700	Hm1	Zea mays Helminthosporium carbonum susceptibility1 (hm1), mRNA.	Zea mays	GTTCGTCTTCCTCGTCGCCACGCCATACGGGCTCGAAGTCGAAGGCTCCAAGTACAAGAGCACGGCGGAAGCTGCAGTGGCCGCGGTGCGCGTGATCCTCCGGCAGTGCGAGGAGTCCAAGACGGTGAAGCGCGTCATCCACACCGCCTCCATATCGGCCGCTTCGCCGCTCAAGGACAAGGACGAGGGCGCCGGCGCTGGGTACAAAGATTTCATCAGCGAATCTTGTTGGACGCCGCTCGACGTTGACTACCATCTTCGCAGCGCACACTTCGATAAGTACATACTGGCGAAGTTGCAGTCAGAGCAGGAGCTCCTGCGCTACAACGACGGCGAGAGCCCGGCATTCGAGGTGGTGACGCTGCCGCTGGGCCTGGTCGCGGGCGACACGGTCCTCGG…
Seq_46012	Sobic.009G167900	RFO1	Arabidopsis thaliana RFO1 (RESISTANCE TO FUSARIUM OXYSPORUM 1); kinase (RFO1) mRNA, complete cds.	Arabidopsis thaliana	ACATAAGATAAATCAGCTAGCCCTTCATCATTTGCTCTTCAGCTGTTGTAAAACTGTCATAGTTACTCTTCATCGCTTTATAGGTGCAACTGAATCTAGGGTGACACTACCAGCAAATTGCTTTTGAGGTCAACACCAAAACATTTTACAGCACTTTGGGCGTCAGGTATACCGGAGATGGGCAAACAGATGCTCCTCAGCGATACTGAAAAGGCTACTAATAATTACATGTAAACCAATCAGGGAGGCTCCAACTATCTAAATCCCAGACAAAATAATCATTAGCAAATGGAAGAGGGTTTCTGCTTAGTGGGCCCGTGGGGCAGACTACAATGCGTGGAGAAGAGCATCGGCTGCAAGCTGCAACCTCACTCGCTACCCAGTTTTACAGACCCATCT…
Seq_46026	Sobic.008G163300	PEPR1	Arabidopsis thaliana PEPR1 (PEP1 RECEPTOR 1); ATP binding / kinase/ protein binding / protein serine/threonine kinase (PEPR1) mRNA, complete cds.	Arabidopsis thaliana	GGAAAAATAACTCTATAGAATATAAAGTAGCAATATCATTTCCGGTACAACTCGCTTGCTAATCGCTCGCAATTTCTTTACATGCATTGTTCCAAGTCTTACAACAATGTAGAAAGGCAGATTTCTGCACGTAAAAAAGAAACCAGCAGCATACCCCCTTGGCATGCTCCAACGAAAGAATGAATCTCAGATACTCAAAGGATCCAAGGAATTTACAGGAGAGAACAAATACCTCCCTCTCTATGACAACCAACCTGCTCGGGTTGTTGCCAAAGGAACTTTGAAAACCAGTAACAATGTACAGGATGATGTGCCGCCATATTAGATGGCTGCTGAGCACCTCAAGCAGCTGTTCAAAAGCAAACTCTATGGACCTTGTCCTCTGAATAGAAACTTGAT…
Seq_460306	Sobic.003G345200	Pid2	Oryza sativa Indica Group cultivar Digu B-lectin receptor kinase (Pid2) gene, complete cds.	Oryza sativa Indica Group	GCGTCAGACCTCCACGCTCGCACACTCTAGAAGAGTTCTTGTGCGGCGCCCGCCGGGCGCGGCTGTTGGATCCCGTGCCGCCGCCTCGCCTCGCCCGTCCTCGGTGCGTCAGCGTCCCCGTCATTGTAGCTGCCGCTGCGTGCCTGCGCCGGCCAGCCCGCTTGCTTCGCCCTCGCTTCGCTTCAAATGATAGAGCCGGAGCCGGTGCAGGCTGAGCGACCGCGAGCTTGACCCGGGCGCACGTCGGCTCGCACAGTCGCACCCAGCCATGTCGGCGCCTGGATTCGATGACCCCCAGCTTCCGCCGCTGCGGCTGCGCGCCTCGTGCGGCGGCGCGATCGCCAGCCCACGCTCCTGCTCCTCCTCTGATACCTTCGTCAGCATGCGCTCCACGCCCTC…
Seq_460411	Sobic.005G093101	RPG1	Hordeum vulgare subsp. vulgare RPG1 (Rpg1) gene, Rpg1-Swiss Hv 489 allele, complete cds.	Hordeum vulgare	ATTCATTATGTCTGAAATGGTTTTTTATAACACATAGGTGTCTATTAGTTTGTACAAACCAGTCCGTGCATATGCACTTGTTGAAAAATAGTATACAAACATACAGATACTCTAGTAAAAGCAGGCAACGGGTCGTCACACAGATCTTCATACAATACTGTGGCTTTTGGCTCCATCGAGATTCCCAAATTAAAACCGTGCTGCCCTGCAAAGGCCGCTACATCTTGACAATCAAGCTGCCAAAAACCAGCGCCGTGATAAAGCTAGCAAGGGTCCCTGCAATGTCGCCAAAGGTGCTGCTAAACATGTTCTCAAGCACGCTGTCGACATTCAGGGCGTCGCCACCCACGTCGTCCTGGTTACGGTAGCAGGCCTCCCAGCTGCGGCGAGCCATTTCCT…
Seq_460438	Sobic.008G190000	ER - Erecta	Arabidopsis thaliana ER (ERECTA) (ER) mRNA, complete cds.	Arabidopsis thaliana	CAAACAGGCCACAAATTTGCATCGCAACCACAACAGTGCAGACAAACTAGTCAGAAAATTACCGGCAGACAGATAAAGGCCACAAAGGAAAACTAAGGAAAAACAAAAGGCCAAAAAGGAAAGAAAAAAAAAAGGAGAGAAGATCTATGTACAACAGAACATGCCGATTAGATTGTTGGTTCTGTGCCAAGAACCAATTTCACTTTGCTTGAGCTGAGGCTGATGAGCACAAAAGAAGATGAGAATCTGCACTTGTCCAGCCAGCACACACACACCTAACACGGTTCATCATCACCATTGTATCTACAAAACTTTTCCTCCCTACTACTCAAGTCTCATCCATCATGCATGCGCTTGAGCAGCAGCTAGCATCATAGTCAGGCTCCTCAGCTCAGAGCT…
Seq_460686	Sobic.002G128300	Mla6	Hordeum vulgare Mla6 gene, exons 1-5.	Hordeum vulgare subsp. vulgare	CCTCTTTATTATTAGGTATAGATAAAACTTGTATTCGATTCAGTTATGCCTAACCATACATATCTATTGGCCTATTTGCTCCAAGAGGGGAAATGCACCTTTTTACATAGTCTCCTAAATCGTGCTTTGACCCACCTCTGTTTTTTTTATATACTTGTAACCATACATATATGCTTTTTACATATCTTTGATGGCAACGCGAAGGCTTCCCGGATGCTTGCTGATGGCTTCCTTGAGCGCAGCCTTCAGGCTTGTCTCGTCCCACCTCCGCTGCTCCTCCACTCGTGGTCTCTCATGGTCGGCGCAAAGATACAACCTGGAAATGTAGCCCTCGCGCTCGTAAACATGTACCTTCAACTCCACGAGGCTATTAAGGTGCTGGATGCCGTCAAGCACACC…
Seq_460814	Sobic.001G410100	PEPR1	Arabidopsis thaliana PEPR1 (PEP1 RECEPTOR 1); ATP binding / kinase/ protein binding / protein serine/threonine kinase (PEPR1) mRNA, complete cds.	Arabidopsis thaliana	CCGAGAGCAGCTTCTCCCATCAGCCCCTGCCCCGCTCGCTTTCTCGTTACCTTCCTCAGCTGGAGTCCGGCCCGGTCGAGGGAAGAGCACCACCAGGCAGCAGCAGCGATCGAGGCCGGCTTCGGCTTCAGCCGCCCCACGCCTTTTATAAATCCCACGGTTGCGCTTCCACTTTTGACAAATCGGTCGCGAGGGGAGAAAGATAAAGTCAAATTGCCGGATTTGCTTTGCTGCTTGCACCTGTGACCTTGTGAGCCGGTCTTCCTCTTCTCCGTCGTCGAGGGGAATAAGCCAGCCTGCCAGGGCCTCTTCCCCGGGGGAAGAAGACGATGAGCGGAGGAGGCATGGACGGAGCTCCGGTCGCCGAGTTCCGGCCGACGGTGACGCACGGCGGCCGGT…
Seq_460819	Sobic.001G075000	Pid2	Oryza sativa Indica Group cultivar Digu B-lectin receptor kinase (Pid2) gene, complete cds.	Oryza sativa Indica Group	GCTAAGTACTGTACTAGCTTCCTCCGGATTATAAAACCGGTAGCGCCAGAACGCGACTGCACTTCAAGCGCGGATCTCAATTCGGAGTACAACAATACAAGCAGCTGAGTAGTTCGGCCGATGTGAATGAATTGCCAGAGCTCTTCTTGGCAGCTTGCTGCTATGATTGACTTGCGGCGCGCGCGGTCTCTTCTCGCCGCCGGCGTCCTCCTCGCCGCCGTCCTCGGCGCCGGCGGGGACGACGAGCAGTTCGTCTACTCGGGCTTCACCGGCGCGCCGCTCGCGCTGGACGGAACGGCCGTCATCACGGCGTCGGGGCTGCTGGAGCTCACCAACGGCACGGCGCAGCTCAAGGGCCACGCGGTGCACCCGGCGCCACTGCGGTTCCAGCGGACGCCG…
Seq_461127	Sobic.007G060900	Lr10	Triticum aestivum resistance protein LR10 gene, complete cds.	Triticum aestivum	AGCTATCTCCATGCTGAGCTGCTGTAGTATTCACATGGATGAGATAAATTCAAGTGACAAAAAAAATGTGTGCCTGATACAAACAAGAGCTTAATATGTGTCCGGTACAGGCAAATGGGAATGTGCCAAGCCTTTATTGGAAGCTAATTAGAATCTTATAACCAGTAGCAACCACACAAAAGCTAATGTGCCAAATGCCCAAGATCGATGTAGCCAACCCATCAACCTCATGCAGACTGATATGTCATTCTAATTGCTGCTACCGCTGTCCTCTTGATGTGCCACTTCTTCTTCACCGGTCTGTTCCTCCTTACCAGTCTGCTCCTCTTCTTCCTTTTCATGTGTCTCATCCTCTAGTTCAGTGTCAGTCTCTCCATCAATAGCTTCGTTTGCCTGCTC…
Seq_461188	Sobic.001G074000	ER - Erecta	Arabidopsis thaliana ER (ERECTA) (ER) mRNA, complete cds.	Arabidopsis thaliana	TTAAGATCTGACTTCAAGGCCTTTAGTTATGGCCCACTCCAGTGTTTACACAGTGTTTACACAGAAGCAGAAAGCACTTTAAGATCATGGTTCCACAACAAAGATTCTGGCGCTAAATTTGACAGAGAGTGCACTTGATACTTCAGTGCCTACTACAATATTAGAGAAGGGAAATCAAAGGCTCTAGCAATGTAACTCAACTCGCTACAGACTCCTACTACATTGCAGCAGCAAATGAAACATGGCAAACTGGAAACAACCAACCAACAAACTTGAATATGTACAGCACAGGAGACCAAACTTACTGCATCCTAAATTACGACCTAAGCTTGAGAGATCGAAGCACGGATTTTGCAAGGAATGGTAACGTTTTCAATTTCGGTGACTCAGATGCTGATG…
Seq_461196	Sobic.001G518000	Serk3A	Nicotiana benthamiana SERK3A (Serk3A) mRNA, complete cds.	Nicotiana benthamiana	ATTACTCCGGTGGAACGCGATATGATTCCGGCGTTTGTCTTGGCTCCTCCTCCTCCTCCCGATTCAGCGTGGGGGCCGTGTCCAATGCGGGGCCTCCCTTCCTTCCCGTCCCCATGGCGCCCGCTATGATTTCTTGCCAAATCACTCGCGCCGTTGCCTCTTAAGCCGCAATCCGTCCCCCGAGTCGTCGCCTCCCTCGCCCCTCTCTCCAAACAGTCCACAGTCCACACGCGTTGTTTCCTTCTCCTTCCGGCGCCCCCTCCCGCCGCTCCTCCGCCGGAGGCGCCCCGGCGGAAGAAGCCAATGAGTTTGGCTCCCGCGCACGGGACTGGAGATGCCCTGCCTGACCCTGCAATGCAATCCGTCGCCGGTCGCTGATCAGTCGAGCTCCTGATTCTT…
Seq_461217	Sobic.009G169400	RFO1	Arabidopsis thaliana RFO1 (RESISTANCE TO FUSARIUM OXYSPORUM 1); kinase (RFO1) mRNA, complete cds.	Arabidopsis thaliana	CGGGCATACCTGTACAACTTATGCCCTGCCTAGATACTTTACAGGCTTTTAGATTTCTTTGCTTTCCATAGAACAAATGATGAAATGAATACTTGGTTAAAACCAAAAAAAAAGAATGAAAGAATTGTGTGCCTGGGCATACCTCACAACTTATGCCCTGCCTAAAAATACTAACTGTACACAGGAGAGCTGTGTATCTTGTATTAAAAAGGTAAACTGTACAATTTCCTACGCTTCTCATAGCAGATGGACAGAGCTGTAGAGTCTGGGCAAGTCAGTTGCACAATGGACAAGCTTCATGATGTTATGATTTCAAGTTCAGCCCACCAAAGCGCGCTGTTCCTCGGAATCGCCTGATCTTGAGTCATCCCAGTGATCTCTTGCATCCTCTTGGTGACC…
Seq_461228	Sobic.001G208600	PEPR1	Arabidopsis thaliana PEPR1 (PEP1 RECEPTOR 1); ATP binding / kinase/ protein binding / protein serine/threonine kinase (PEPR1) mRNA, complete cds.	Arabidopsis thaliana	CTGGCTGGCTCCTGGCTGAAACCACACAGCTACAACTCACTCTTTCAGCAAGCACGCACGGATCAGGCAAGGCAGTGCAGTTAACAAACAATAATATGAGCAGGCACTCTGCTACAACTCGCTTCCTTCCATGGCCATGAAGGCAGTGTTATGTTAACCCGGCCGGCCGCTACCTACAAGGCTACAAGACAAGACCACCTACTAATCAAAGCATGGAGGAGGCCTCCCCGAGCGGCGAGCGCGGCGCGGCCCTCCTCTCCGGTCTCCCTCTCTGAGCGGACGGCGAGCGCGGCGAGGGCGGGCGGCAGGCGGGCCCGCGCCACGGAGGCACGTAGCGGAGGCTCGCTATCCCGCTGGGAATAGCGGAGGCGCTCTCTTCCCGGACGGGATGGAGTACCC…
Seq_461249	Sobic.004G207000	Cf-5	Lycopersicon esculentum disease resistance protein (Cf-5) gene, complete cds.	Solanum lycopersicum var. cerasiforme	TAGCACTAAGAAGAAATAAAAGCAAGTTTACAATCTACACGACAAATCCACTGGATTAGACGATTGTTATCAAATGATCTTCCAGCAAATGGACATAATATAACATCGAAAGGTAGCTCAACAGCACTACATCCATGCCCAGTTTTGAACTAGATCAGAACTAAAAACCAAAGAAAATATTTACATCCGAAGTGGTTCACAGTACCAGCGCTCCAAATTATGTGCATCCTTGGTGTCCAATCCTCCAACCACGCCAGGGCTACAACCAAGCACCAGCAGGTGATTGCATTCTATAACAGATGGGAATATGTTAACCAGATCTACACATCCCAAGATCAAGAATATTATTAGGAAACAATCAAGAAATCTTGATTGATCATTAAACGAGATGGCACACTT…
Seq_461404	Sobic.002G393900	Pikm2-TS	Oryza sativa Japonica Group Pikm2-TS mRNA for NBS-LRR class disease resistance protein, complete cds.	Oryza sativa Japonica Group	GTACATTACATTATGGAGAATTATGTGTGCAATCTAGCTAAAATCCAACAAATAATACGTACATTACATAAAATCCAACAAAACCAAATAGCTTTGCTCGAATAGAGAATTGCTAGAGAACAACATTATGGTACATTACATTACATTATATAGATGCCTGTATGCAGCCTTATCGATAATTGAAATGCAACTACACACAACCGCGTCCACCAAGGTAAAGTTTAGAACCTGCTCCACAAGTTATGCCACTGTGTTGCCAATTGGTTCAGCTGGTTGCCTCTTCACACACGGCCGGTTAGGGTGTCCGTTTGCTACTGTTTCCCACTCTTGTTCCATTGCACTGTGGAGTATCACCTCACTGAGATTTGCAAGATGCGAGATGCCTTCGATGGTTCCTGA…
Seq_461476	Sobic.004G007800	Serk3A	Nicotiana benthamiana SERK3A (Serk3A) mRNA, complete cds.	Nicotiana benthamiana	TCGCCCCCCTAAATTTAATTAATTCATGGCTCCGCCGTTTAATAGAATCCATGTTGCACATCTACTTTCCTGACAAACTTAGAATCGCTGGATATCCAGTGTTGTTGGATATCTATCTCGCGTGCGCTGTGGATTCAGTTCAGATTCAGACATGGAGGACTGCCATCCCTCCTATCGGCATTGATCTGTGTTCATCCTAACCTATATCCCTATCCCACAATGATCACAATACCATTTCTTTTCCCCTTGTCGATCTAGATGTGTTTTCTTGTACTGTACATTCATGGATGCAGTCATGCAGATGCAGATGCAGGTGTAGACTGCATTCGTGTAGAGCCATGAACAAGAAGATGAACAGAACCCGCCGCCGCTGCACCAATCAGAACCACAACCATCTCC…
Seq_461478	Sobic.003G281400	Lr34	Triticum aestivum chromosome 4 clone BAC ABCT5; BAC ABCT33 map 4A, *** SEQUENCING IN PROGRESS ***, 7 ordered pieces.	Triticum aestivum	CGGGCGGCGGCGGCGGCGAGCGGCCGATGAGCATCCGCGGCATGTTCCGGTTCGCGGACCGGGTGGACGTCCTGCTCATGGCCCTGGGCACGCTGGGGGCCATCGGCGACGGGTGCTCCACCAACCTACTGCTCATCTTCGCCAGCGACGTGATGAACGCGCTCGGGTACGGCGGCGCCCAGGCCGGCGGCGGCGCCAAGAGCGCGCAGTTCATGCACGAGGTGGAGAAGTCGTGCCTGAATTTCGTCTACCTGGCGTTCGTGGTCCTGGCGGTGGCGTTCATGGAAGGGTACTGCTGGAGCCGGACGAGCGAGCGGCAGGTGCTGCGGATCCGGTACCTGTACCTGCAGGCCATCCTGCGGCAGGAGGCGGGCTTCTTCGACTCGCAGGAGGCCACCA…
Seq_461685	Sobic.009G082000	Serk3A	Nicotiana benthamiana SERK3A (Serk3A) mRNA, complete cds.	Nicotiana benthamiana	ATGCATCTAGAATTGTTGTTTTTCAACGGAGGTAGGAATTGTAAAGTGGAGTGTCCCCCTCACGTACAGATATCGCTCGCTGCCCACATGTTTCTTCCACCGTGAAGAGTGGGTGTGGCCGTCACATCTTATCTTATCTTTAATGCGTTGTGGAATTCCACGGCGTATGCAGTGAGTGCTTTCACCATCAGGGTATCACATCCGAATTGACCTGTAGTGGCAGTACAGAAAATAGCTCCGTAGAAAATCTTGTGCTTTGAGCAATTGAGCATAAGCCACGTTAGCATCACCAGGAACATTACAAAATGCTATACTGCTGCCGAGAAAGCCCAATATGGTGAGAGCAGGGCCTCCCCCCTCGCGATGCATGGACCTGATCTCCAGGAAAAGCTGGTTCAA…
Seq_461686	Sobic.009G082200	Pid2	Oryza sativa Indica Group cultivar Digu B-lectin receptor kinase (Pid2) gene, complete cds.	Oryza sativa Indica Group	GATTTAACTTACACCCATACACTGAAAAAATGGCATAAGTAGATACCTTACATGACCCTGAACATTATCTTATATGACTGGATCTTTTGGTACATAATGTATACTCCTAGCTAGTACATTCTTACAAGCCAAGAAAATCTTGAATGCACAAACGCATGGGGGTAGGGTTTTGGGCCATTATATATTTGTCAAAAGTAGAGTATATATATGATGCTGCGTGATACACCTTGGGAAGGCTGAAGGCTCATTCTCATCTTGGTTCAAGCTCTGTGAGCGAAACCTCATTCGGCGACATTATCGTTGCTTTTGATTTGTCGGTGGACTGCAACTTCAGTGCCCTGTTATACGCATCCGAGTAAAGGTGCGAGTTGCCTTCCACCTCCTGAACGCAAAATGTAG…
Seq_461789	Sobic.010G171600	RPG1	Hordeum vulgare subsp. vulgare RPG1 (Rpg1) gene, Rpg1-Swiss Hv 489 allele, complete cds.	Hordeum vulgare	ATCTTCTCCAGGTGCAGCCTCTCAAGCCTTAGGTCTTCTCCAGCGATACTTAAGAGGAGTCTACTTGGAGCTTAGTACATATACAGCTGAAGTTGCGTAGCTTCATTTTGATGTATACACACAAAAGATAGCTTCCTTGGTTTGGTGAAATCATTCATACAGAAGTTTCATGACTCACTGAAGGCACCCTGCACACTGGGGAAGAAAAACAGATGTCCGTTATCATGTGAAACTACTTTTGCAGTCAGGATTTTGCTTAAAGGGAAATGGACAGTGAGTTTAGCAGCTGTGATATCCTAGAGAGCATGTTACAATATGGCAGTTCAGAACCACGCAATCTACCCCTAGAATATTTGAGAAACATCACAAACAACTTCTCTGATGAGCGACTTCTTGGTG…
Seq_461800	Sobic.008G138900	Lr10	Triticum aestivum resistance protein LR10 gene, complete cds.	Triticum aestivum	TTCTTCTTCTTCTTCTTCTTCTTACTGCCTCCTCCGATGCTCCTCTCTCTCATCATATTGCTCCAAGCCTCCAGATAATTCAAGATGTCCTGGGTGGATGCTGACAGCGTTCCTGACAGCAGCTTCAGCAGCCTCCACCCTGCTCCTGGTGGCACCTTCAGATCGGATTGCTACTTCGATGTGCTCTAGGCTTGCAAGGTGCTCGAAGCTGAACTCAAACCCCATCTTGGAATCTGTTTCCTGAACTCTAAAATCAAGATATAACCTTCGGAGCTGGGGCATGGCTTCCTGTAAGAACAGCATCTCCAGGCCACCTCCGTATGTAGAATTGTTGTACTTGAACTCTTTAAGGCACTGGAATAGTTGGCTGCTGATGGTAAGCCGTTCATCAGGGGCATG…
Seq_462102	Sobic.002G045200	Cf-5	Lycopersicon esculentum disease resistance protein (Cf-5) gene, complete cds.	Solanum lycopersicum var. cerasiforme	TTTTTTTTCAATACAAATACGACGTTATAATCAATTCACTTGGAAACTTAGCACATCATACCATCTTTTTACAACACACAGTGATAATCCATAACACGATAGACAGGTAGAGATGACATTGGTGTTTGAGCACCATGAACAGAGCATGTGAATTTTCAGATGCCTACGACAACAGACAACACGAGACGAGACAGTCATTTGTTTAACCCAAGTGCATTTGCCCTGCAGCCTCAGGCCTTGGAGCCATCCGGATGATGTCCAACGCCCATGCCACCGAGCCCGTGGCCACTGGCGGCGGCGGCGGCGGCGGCTCGCGTCGTCAGGCACGATGGCAGCGTCCCCGTGAGGAGGTTGGACGACACGTCCACGAACCGGAGGTTCTCGCCGCAGGACATGTTG…
Seq_462172	Sobic.006G160000	ER - Erecta	Arabidopsis thaliana ER (ERECTA) (ER) mRNA, complete cds.	Arabidopsis thaliana	TAGACTAGTACCAAGCAGTTGCCCTTGCCAAGCCATCATCACCGCTTGGCGTGGCCGTTAGGTGCACGCAGTGTGCAATCCGCTTCGTCCTCTTCCACCTTCCTCGCGGCTCCATCGGCGCGGCGGGCCATAAACATACCACGACACGAGGACCTCGATGACCATGTGATTGCGAAGTGAAGCAAGCGAACGAGCGAGCCTCTCTGCTTTCCTCTCGATCACTTTTCTCCCGCTTCTTTTTCTTGTGGTGTTGCACCCAGCACCCGTGAGCATTTTCCGGGAGGGCTGGTGTGTGTGTGTGCGCGCGCGCGGATGGGGAGGAGCGGCATGTCGACGGCGAGGCTGCTCGGGATCTCCTTCCTCTGCGTGCTTTTCGTCAGGACCTCTGAATCTGCTTCG…
Seq_462352	Sobic.004G288600	RFO1	Arabidopsis thaliana RFO1 (RESISTANCE TO FUSARIUM OXYSPORUM 1); kinase (RFO1) mRNA, complete cds.	Arabidopsis thaliana	TATAACCTCAGGAGCCATCCAGTACGGGCTACCCTTAAATGAGAAAGGGCACTGCTGCCCATTGATATGTTTTGCCATCCCAAAGTCAGCAAGCTTTACACGGCCATTAGGGTCTACCAATATGTTTGCACCTTTGATGTCCCTGTGTACTGTATTCTTTGCATGCAAATAAGCTAGGCCCAAAAGTATTTGCTTAGTATAACTGCGAATGGCCTGTTCACCAAACTGGCCGTACTCTTGGAGAAGCTTATGTATAGATCCACCAGAAACATACTCCAGGTATATGTAAAGCTTATCATCAACAGTTTCAGATCCATAGTATCGCACAATGTTTGGGTGCTGCAGTCGGCTCAGAAGTGATATTTCCTGGCACAGCTGTTTTGCACTTTCTTTTGATTT…
Seq_462395	Sobic.006G276100	RFO1	Arabidopsis thaliana RFO1 (RESISTANCE TO FUSARIUM OXYSPORUM 1); kinase (RFO1) mRNA, complete cds.	Arabidopsis thaliana	TTTTGAACCATAGAAGAGGATTCAGGAAGCATGTCAAAACAGTCAAAACATAAAGAGTACATTTTTTATGTCTTGTATACAAAAACTAAAGGGCATTTTATGCTGCTTGCAAGCTATTTTATACAAGGATACCGTGTGTATTTGCTTGTCCTGCTGTATTGTCGACACTTCTCCCGTATATACTATTTTTGGGAGTAATAGAAACACACACCAATCGGGCAGAAAAAAAAACATAGGCAACCACCCTATACATATGTGACAATTGTACAAAAAACATTCTACACTAGCAGCATCTTCGTAGCAACCAACCGCCGTACCGTAGCCGCAGCATAGTAGCCTCAGAATCTTGGATGATGATAACCAAGCTTTGCACAAGCTTACTGACAACCTTGCTATTCT…
Seq_462400	Sobic.009G083300	Lr34	Triticum aestivum chromosome 4 clone BAC ABCT5; BAC ABCT33 map 4A, *** SEQUENCING IN PROGRESS ***, 7 ordered pieces.	Triticum aestivum	GTTTAGTATTTTAGTGACTAAAGTTTAGGAGGGGTGAACCGAACACGTGCACAACCCTATCTTTTGTGTATGGGTGTCTGCGTGGTTTTCTTAAGGATCATTGCCTGATTTAATGTTTACAAAAACAAAATGTAAACAAAAATAAGTGCGCACAAGTGCACAACCCTATCTTTTATGTATATGGGTGTTCAGAGTTATTACAGTGAAACGAATGCTCTGAAGACTATCGCGTGGGTATCTTTGAGATCGCTCTGACAACTAAACAATCAAACAGACAAATCTGTAAGCACATACACATGTAATTGTGATATCAACCACTAGCTACCAGCAGCACTCTCTGCTCTTGGTCTCCTCGGCTCAGTATGGCATGGGCGAGTTGAGGCCCTCCTGGATGGCCAT…
Seq_462537	Sobic.005G209400	Serk3A	Nicotiana benthamiana SERK3A (Serk3A) mRNA, complete cds.	Nicotiana benthamiana	TGCCAAATATTTTACTGTTACATCTCTGTGCTGTTTAAACAATCATGATAACGTACATATTATCTCCATACAAAGCCTACGGGTAAAAAAACATTAGTTGGAGACTTGCAGTATAGCTCATTAATTGACACTTTCAGCATTGCAACTATCCCTCTGTGGCTCTTATAAAGCTACAATCAGATTTAGTATTTCCAATACACTGGCCTATTATTTACCGTGTGCCCTCTGCACCTCCTTGATGCTGCCAAGCATGGTGACAACTTCTGACATGGTAGGCCGATGTTTGGCAAGATGGTGAACACATAACTGTGCCACCCTCACACATTCCAGAATCTGAGCCCGTTCATGCTCGTTAACGCGCAACAATGGATCAACAAGCTGGAGCAGCGCCTTTCGGTT…
Seq_462567	Sobic.007G105100	RPG1	Hordeum vulgare subsp. vulgare RPG1 (Rpg1) gene, Rpg1-Swiss Hv 489 allele, complete cds.	Hordeum vulgare	CGGACGCACACGTCGGTGAGTCGAAGGAAAACAAAAATACACGCAGCGTCTTCGTCTCCGTCTCTTCCTCAGTTCCTCTCCGGCACGTTTCTCAGATCTGCGCCGGCTTAGCCCCGCAACACCGCCCCTGCCCCGCCTCCTTTCGCGACGACCCGGCCTCGCCCCGCACTGCTACGTCCATACGACGCCGTCGCCCTGCCCGGCCTCGCCTGCCCGCTCCATCCCTGCGCCGGCTTCACCCCGCCCCTCTCCAGCGCAGCGCCGCCGTCGGCCACCTCATCCCCTCAGCCGTCGACCCCGCTCATCCCCTCCGTTGGATTTGCCAGCAGTGATGCGCCCCGGGGGCAACGACCGCTAGCTGGGCCCACGGGAGCGTCGGGGAGCCGGGCGAAGCTCGTG…
Seq_462879	Sobic.007G006200	Mla12	Hordeum vulgare subsp. vulgare MLA12 (Mla12) gene, complete cds.	Hordeum vulgare subsp. vulgare	TTTCATTTTATTTCTCGCTGCTCAAGTGGTGTCAACGAGAAGAGGAGCAGAGAGGATGCTTCAGTACTAGGAAGGAACTGCTCCTTGGATCTTCAACCTGTGCTCCTCTGTCTCTGCTTCAGAGCATACCCTTGCAGTTTGCTAACTAAAGAGACCTGATGCAGTACATACTCTGATGATCTGCCATCCGCTGCTTCTATATATGTGCCTGCTGCTGCTGCTGCTGGTCGTACATGGTGGATCTCGAGCCACAGTTCACGCACGGGCTGCCAATCTGAGTTGTGATCGATACATCGGCCATCTCTGATCTATTGTCAGCATGGCACATGCATATGTATAAGCTCGTAGTCGACCAGATCTATGCTCAAGAAAACCAGCCTCTTAATAATCAATTAAGAA…
Seq_462946	Sobic.004G069200	Serk3A	Nicotiana benthamiana SERK3A (Serk3A) mRNA, complete cds.	Nicotiana benthamiana	GGTCATTTCAGCAGGAGCCGGCTACTAGCCCTGAAAGTAGCGATAATTATACATGATGAAAACCTAAAAAATGGCATGTTATAGACTTGCACACAAATCATTAATGGACTGAAGTAGCTAAACGCTAACAGCAGTGCAGTGAACAGCTTGCTACAGATGGAATCAGGCCCAGATTTACAGAATTTTACAAGCTAATAGAACCATGCCAACACGAAGAGATGACACTATGACAGCACATAGGAGAACTGGGCAAGGAAGCTCCCAAATTAACCACAAAAATACACTGATAAACACATTTCTCCCACGCAGGGAGCTCAGGGCACCTACTGACAATAGCACTGCATCACACATTCACACTACCTTGCTGAGGGAACTGTCTCACTTGAGTCAGTTGCCTCC…
Seq_463015	Sobic.003G100700	Serk3A	Nicotiana benthamiana SERK3A (Serk3A) mRNA, complete cds.	Nicotiana benthamiana	GTGACACACTGACAGTGCACGATACATCTTCTCCGTCGCCTAGAAGAGACGGGTGGAGATCGGAATTCATTCCACTCGGGCAGGAGAAATTTCTGCAAAGGTACAGGGTCACATGCGTCGGATTTCGGGGGGAGGAGGAAGGCAGGAGGTGAAGACAGGAAAAGGAGGGGAAAGAAACAAGTGAGAGACTGGAGAGCGAGGTCCTTCTTGCCTTCTTGTTCGTTTGCTGCTCTCCACTCTCCTCGCTGTTCTTGCGGTTACCTCCTCCTTTTGCCTTCAATGCTACCGCGTTACTGCTGGATCTGACAGACCCACCGCGTCCGCCGCCTCCGACTCCGCCTTGAACTTCAATCCTGGCACCGGCATCCCCAAGATTCTGCTGTTCCTTCGGAATTCCGT…
Seq_463016	Sobic.005G096300	Pid3	Oryza sativa Japonica Group cultivar Nipponbare resistance protein Pid3 gene, complete cds.	Oryza sativa Japonica Group	CCTTGGTCCGGAGCTTCACATTGCCTACTTTATCTGAGTCCTCTTACTGTCCCAAACATCAACCAGGCACCAGATCCGCGCTCTCCCACTCCAGTGTCCATCCTCTCCCTCCTCCACCCACCAATCTCTGAAGCTTTACCACTACGTGCTCCGGCGGTTCGGCCAACAGGAGACCAGCAAGTGCGACGGCCCTGCGCTCATCTGACCGCAGCTTCATCCAAGAACTGAACTAATGGCAGAAGCACTGCTAACTGCTCTCTCGAAAATTGGTACCGTTTTAGGAGATGAAGTCATCAAATTCGTCATTGCTGAAGCATCTAAAAAGGCAACTAATCTGAGGGAGCTACCAGAAAATATAAGGCACATTGAGAGAGAATTGAATATGATGAGAAATGTAAT…
Seq_463062	Sobic.002G431600	Serk3A	Nicotiana benthamiana SERK3A (Serk3A) mRNA, complete cds.	Nicotiana benthamiana	CACTTATTTAGTATCATAAGTATATAGTATGCTAAAATTGCATATATATTTTTAGACCTCCCTGGTTCATTTCGAAACACAGCCTGCATGAGCATCAATCAGCTCTTCTTCCGTCTCGCTGTAATGACTGATTTGTTCATCAGGTCAGGCCCGAGCCCTTCATCAATGGAATCCACCAGGGAAACACTTGGCATTCCCAATACATCATCTCAAACAGGTGCTAAACCAAAGGTTTTGAACAGACCATCGATGCCCTCCATTCCAACAAAATGAGACAAAATTCTCTCTTCATCTCCACAGGCACCCCAGCTCTTGCACATCTTAGATTAGATGCTTACCAAAATTCTGGGCTTTCCCAAACCATCCATCGCCTTGGTTAGCCACTTCCTCTCTGATCTG…
Seq_463116	Sobic.003G080700	Pid2	Oryza sativa Indica Group cultivar Digu B-lectin receptor kinase (Pid2) gene, complete cds.	Oryza sativa Indica Group	GGGGACGACTACATCGCCAGCATGAAGAATGGGTTTCTCGTGGAGTGGAAAGCGGTGCCAGACGATTGCCCCAAGTGCATGGCAAGGGGCGGGGAATGCAGGTACGGCGACACCAGCAAGGAGTTCGCCTGTGATTGCTCCGGTGACAAGTGCGGTGTCAACTGGAATGGCAGGAAGATAGCACTAATAGTTTCGATTTCAGTAGCTGCAAGCTTGCTCCTACCATGTATATATGTGTTGGTATGGCATAGGCAAAAACTAAGGTTTTTCCTATGCAAGAAGACTGGCAGCACCATAGAAGAGAACATTGAGGCCCTAATATTAGCACATGGATCACTAGCTCCAAAAAGATACAGGTACTCAGAAGTAACAAAGATAACATGTTCCCTTAATAATAAG…
Seq_463381	Sobic.001G168400	RFO1	Arabidopsis thaliana RFO1 (RESISTANCE TO FUSARIUM OXYSPORUM 1); kinase (RFO1) mRNA, complete cds.	Arabidopsis thaliana	AAAAAAGGCAGCGAGCGAGGTGGGGGAAAAAGGGCGAGGTGATACCGTGATAGAGAGAGAGAAGGCGAGGGAGGGATCACGAGGTGTGCTTCCTCCTCCGCCCAATCGGGCCCAACCAAATCCGCCAGCGCCGCCTCCTTTATACTCCCTCCCACCTCTTTCCCCGGAGCTAAAAGGGAGGGAGAGGCTCGCTTCGCTTCTTGGATCGCGGGGGGTCACGGGACGCGCGCCGCGGGCCGGTACGCTAGCTGCTGCTGGTGGACTGCTCGCCTCGACCCTTGCCTAGCCTACCAGCTGCTGCTGCTGCTGCTTTGGCTGGCGCCGGCGAGAGAGAGAGAGAGGCGGAGGGAGGCGACGGCGATGGACCGGGCGGCGCTCACCGTGGGGCCGGGGATGGAC…
Seq_463492	Sobic.003G117900	Serk3A	Nicotiana benthamiana SERK3A (Serk3A) mRNA, complete cds.	Nicotiana benthamiana	GGCAAAAAAAGAGCACCGAAGTTTTTTAACATGAATGACATAAAAATGTGTATGCTGCAAGTCGTAACACATACCATTTCATGTATGCCGACAGCGGATCCTATGTTATGTATCCAAAACCGCTTAACTTTCACTACAGAAAGGTTGTGTACTCTAGGTGCCTATTATGGAGCTATTACATGTATCTATGGAGTGTGGAGTGTCTGTCTATAAAGCTTTATTTACATGTACGCAGTGAAACAAGTCTGAGTACTGTAGATTCCACCGGTGAAATCTTTGAAGCGCTCACTCTGGTGAAGCTCTACATTTCCGCTGCAAATTATTCCTCATTCTCTTCTAACAATCCTTCTGTATCCACAGTTATCTTTCAAAATGTATGCGAAATAAGCATCTTTGCAA…
Seq_463654	Sobic.006G128900	RFO1	Arabidopsis thaliana RFO1 (RESISTANCE TO FUSARIUM OXYSPORUM 1); kinase (RFO1) mRNA, complete cds.	Arabidopsis thaliana	GTTACATTAATGTACAAGGAAGGATAGTACACTGACCACCATAGTTCACTAGTAAAAGATGAACACTTTTGAAGACCCTCCACATAATTTAGTCACTTAGGTACAACAAGCTGACGGCCATCAAGCTTCCTATCTTGAAGCAGCCACAGCTTAGCTTCTAAGTTGTATTAATGCCATTGATTTCCTGGTGAAAGCAAAAGGCATCCTTCTCCTGCGCTTCTTTCATCTCTTGCAAACAAAATGCAAAGATCAAAAGAAAGGGCACAAGGAGCATAAAGAAAACTAATAATGATGATGTTTTATTTTAAATTTAAATCCACCGCACTGGACATTGTTTACAACGTACCAATCTGGAATACTTTACATACAGAAGTTCCAAAGGTCAAACTGGTGTAACCG…
Seq_463671	Sobic.001G377600	Xa13	Oryza sativa (indica cultivar-group) cultivar IR24 disease resistant allele XA13 (Xa13) gene, complete cds.	Oryza sativa Indica Group	GCAGAAGAGTAGGGAATACAGTTGCACCAAATATGACAGACGGCCGTTATACCCAACAGGTAATTCCAATCCGGTCTTGGCAGGTCGTGCGGTGCCAAACCGGTTTTGAGCACCTCTCCGTGGACTGAAAACCTCAGTACACGCAACGGCACGTCAGTCCGTGCAAGTTCTGGGCTTTTGGGCTGCGACGTTCCAACATGGCTCGTCTCAGGCCGGAACGGAACAACACGCGGCCTGCCCAACCGCGCGAGAAAAAAAGGGAGCCGTCGATCGCCTTCATGCGCGCAGCCCGAAACAAATGCAGCTGGCCGGTGGACAGATTTTCAGTTGATCCAACTCAACATGTTCAAAGATTAGTTCATCTGTGTTTCGAACCGTGCAAATATGTGGAAAACACAC…
Seq_463794	Sobic.007G214300	RFO1	Arabidopsis thaliana RFO1 (RESISTANCE TO FUSARIUM OXYSPORUM 1); kinase (RFO1) mRNA, complete cds.	Arabidopsis thaliana	GGAGAGGGTAGTCATCACTCACTATGAAGGTCACCAGGACAGATTGGACACGGAGGTTGTGGATGGTAATTTTGATTTCTCTCAGGAGGATATAATAATAAAATGGGCTGTAGCAAACTTAACTTGCCAGGAAGCTATGCTAAATAATGCTACATATGCCTGCATCAGTGACAACAGTTTCTGTGAAGATGTCATGCGAGGCAAAGCACGTGATGGATACCGCTGCAAGTGTTCGGATGGCTTCCAAGGAAATCCGTACCTTCAAAATAATTGTACAGATATTGATGAGTGCTCTATTCCAAATAAATGCAATGGGATATGCCACAATTTTGATGGAGGCTTCAACTGTACAAGCTGCTCTCATGGAAAAGAATATGATACAAAGAAACAAAAATGTGT…
Seq_463871	Sobic.001G489300	Serk3A	Nicotiana benthamiana SERK3A (Serk3A) mRNA, complete cds.	Nicotiana benthamiana	GAAAAGCCAAAGAAGCCACCTTTGCTTCCACACCTCAACACCTGAGCTCGGCCGGTGGCGGGCTGTCCGCCGCTTTGCTTGCTTGCTCTGCCTCCGCCGCACCTCGCCTCCGTCCAGCCAGCCAGCACCAAGTCAAGCGATCCGGTCGCCACCCCGACTCGACCTCCCCGGCCGTGCGGTTCTCGGTGAGGGCTGGTTTGGCGGCGGCCTCGAGTTAACTCGAGGTGTGAGCTCGGACACCTGCTGCGGCTCGGCGGCGCCGTTCTGGCAGCAGGGTTTCTTCCCTTCCCGTCAGGAGTGAGTGGGTCACTGGGCGGGGTTCTTCCACCAGCAAAAAAAGCAGCAGCTTGGATTCTTGCTAGGGGCGCACGGTTGGTCAGCTCGGAGGAGAAGATGACC…
Seq_463925	Sobic.010G076600	Pto	Lycopersicon pimpinellifolium Rio Grande-PtoR protein kinase mRNA, complete cds.	Solanum pimpinellifolium	TTTTTTTAAACCATGTTAATGTTACTTTGAACATATTTCGCAATACATGTTGCCTCCAACTTTCGGTATACAAACACCTCACAACTTGAGGTGTGTTCTCGGCAGTATATTAACACAACAAAAAATGAAACAAAAAACTCTCCCCTTCAAATAGTTGAGAGAACGAATTGATAGCATCACCAATAAACAGAAAAACAAAAGAATTGATGAACAATCTGTCAGCTAGCTATGTACACTTGTAAATTTGCAATCCCACTCATCATGCCCTGCTCAGGGTCGGCGGGCTCTCTGGTCTCTTCACGGCGCTGGCGTACCGGCTCCGCAGCGGGCTCTCTGCGTGCACGGCCGACATGACGTGCCTCTTGCCCTGCCGGCTGCCCGCCTCCGCCTCCGCCTCCG…
Seq_464045	Sobic.008G032000	RFO1	Arabidopsis thaliana RFO1 (RESISTANCE TO FUSARIUM OXYSPORUM 1); kinase (RFO1) mRNA, complete cds.	Arabidopsis thaliana	GGAATATATGGCCATTGCCTGAGATCCCTCCCAAGTCCAAGTCCCAAGCTCAGTGGAACTCAGGCAATGGCCATATATTCCGGAGGCCAAAAAGAAAAGTGTAGCTCCCGCACAAAGCTTTGGTTCTCTTGTCGCGTCGTCCTCACTCCCCTCTTCATCGTCCTCTTCGTCTTCGTGGCGTCGCAAGAATACAACATCCATATCAAGAAGCTAAAACCTCAGGGAATGCTGAAAGATGTGCTTTCATAGAAGAGATTTCTGCTGCAACATCAAGGACCTCGCTGCTCCGCAAGGTCTGCTGGCCTGCTCGTCTCTTGATGTGAGCGATCGTCTCACCTGCATCTGCATCAACTCCACACCCTTCAGACTCCGGCACGACCAAGCCATAAGAATGCTGTT…
Seq_464108	Sobic.003G182800	Xa13	Oryza sativa (indica cultivar-group) cultivar IR24 disease resistant allele XA13 (Xa13) gene, complete cds.	Oryza sativa Indica Group	GGAAAGCAAACCAAAACCAACACGGGCGACACGCCGAGCAAAACAAGCGAAATCCCCCACCCCGGCTGCTGACAGACAGCCGCCCCCGCCCCGCTGCTGCTCGCGGCTCTGCCGCCGCGCCCGCTCCTGCCTCCGGCTAATATATACTCAGATCCGAGCGGAGCACGCCCGTGCTGCAGGCCTGCGGAGCAAGTATCTTCCCTCGACGTCCAGGCACCATGGATTGGGGTGATCCGGCATTGACGAGCTTCGTCGCCGACTCGTCCTACCGCCACCTCTGCTGCTACGGCGCCGGAATCGCAGGAAACGTCTTCGCCTTCGTGCTCTTCATCTCCCCACTCCCCACATTCAAGCGGATCGTCCGGAACGGGTCCACGGAGCAGTTCTCGGCCATGCCGT…
Seq_464145	Sobic.003G216000	Lr34	Triticum aestivum chromosome 4 clone BAC ABCT5; BAC ABCT33 map 4A, *** SEQUENCING IN PROGRESS ***, 7 ordered pieces.	Triticum aestivum	GCGGCGGCGGCGGCGGCGGCAGCAGGGGGAGGAGTTGGAGGGATAGCGAGATGGACGTGACGGGGGCCATTCAGAAGGTGGCGAGTATGCGGGGGGGCAGCGGCTCCATGTGGCGGCGCGGTGACGACGTGTTCTCGCGCTCGTCCAGGGAGGAGGACGACGAGGAGGCGCTCCGCTGGGCCGCGCTGGAGAAGCTGCCCACCTACGACCGCGTCCGCCGCGCCATCGTCCCGCTCGACCTCGGGGCCGACGGCGCCGAGGCGGCCGGCGGGAAGGGGCTCGTGGACGTCGACGTGCTCAGCCTCGGCCCGCGCGAGAGGCGGGCGCTGCTGGAGCGCCTCGTCCGCGTCGCCGACGAGGACAACGAGCGGTTCCTGCTCAAGCTCAAGGACCGCATCG…
Seq_46432	Sobic.005G222900	MLA1	Hordeum vulgare MLA1 mRNA, complete cds.	Hordeum vulgare	CAGCGTACATCACAGAATCAGTCAAGGACGACGAGGCTGGTGCTAGACCTACCGACGAAATCAATACAGTATCGAACCTAAAGGAGTACTCCGTTGAACTTATCAGTTACATACTTACATAACGGACCAAAAGAGCACCATGCTCACATAATCCTACGAGCTCCAATTCAGTGTAGAAAATGAGGAGGATGCTAATGATTCTTCCTCGTCCTCATTAGACATCACACATAGACCAGAGGATGAGGTAAATACCAAGAAAAAAATTACATAATTTGAATAATAATAGAAACCAAATATGAAAGAAATAAAAAGAAAATGTGAGTGACAAAAGCGGTAAAGAATGCGGCTCATGTAGTGTGTTGCACAGCTTGCTTGATCACAGCTTGTCCTGCTCCGCCG…
Seq_464403	Sobic.002G203000	Pto	Lycopersicon pimpinellifolium Rio Grande-PtoR protein kinase mRNA, complete cds.	Solanum pimpinellifolium	CTATGGTACAGTGTTTTTCTCGGCCGAACAGCTTCATGGGACCAAAACAAAATTTGATCATGAACAAAATTTTATATGTACACATCTACACAAAATACAGATTATACCCGTACAAAACTTTGCAAGCCGATCTAGCACTTCCCGGCTCGATTCGACCCTCGTATCTACCAAAAAAACACCTCTCTTTAATTGTGTGCACCTGTTCTCTTCCTGTACAACACATGACGCATGACGAACAAGCCATGGCTGTCTCGAAGCAACAACGAAAACTTTACTTACATGCTATATGAAGCTGGTGCCAGTGCAGCCGTGTAACTCCTACGCAAAGTCGCTACAACTTTTACAGCACGGACAGGACGCCACGCCAGGACGAAAAGGGGCCGTTTGTTCACGCGGTCC…
Seq_464468	Sobic.003G268800	RPG1	Hordeum vulgare subsp. vulgare RPG1 (Rpg1) gene, Rpg1-Swiss Hv 489 allele, complete cds.	Hordeum vulgare	AGATAAGCAGAGCGGAGAGCGCCATGGCGGCAACAACAGCGGTCATCAGCGGCCGGTGGACGCGCGTCCGCACGCTCGGCCGCGGCGCGTCGGGCGCGGTGGTGTCGCTCGCCGCCGACGTCGCCTCGGGCGCGCTCTTCGCCGTCAAGTCCGCCCCCGCGGGGTCGGCGGCGGCCGAGCACCTGCGGCGCGAGGGGAGCATCCTGTCCGCGCTCCGGTCCCCGCACGTCGTCCCCTGCCTGGGCCTCCGCGCCGCGCCCGACGGGGGCTGCCAGCTGCTCCTCGAGTTCGCGCCGGGGGGCTCGCTCGCGGACGTGGCGGCTCGGAGCAGCGGCGGGGGGCGCCTCGGCGACGACGAGCGCGCGGTGGCCGCGTACGCCGCGGACGTGGCGCGGGGCC…
Seq_464669	Sobic.004G059000	Serk3A	Nicotiana benthamiana SERK3A (Serk3A) mRNA, complete cds.	Nicotiana benthamiana	CGAAAACTAAAGTTATATATATCATTCTGAACTGCAGAAACAGCAGTAGTCTTGGAACGTAGGCCAACAACAAAGGGCAAGGAACAGCAATGGTGCAAGCAAACATGCTGATTACAAGAACAGGCAGATGTTATTAACATAGGAAAGCTCCATTAGAGTTAGATCTTGTTACATACAAGGAAACATCACCTATACTTTCAGAAGAGATTACTCCAGCTGTGCAACTTACACAAGATAGAATGCAACAACACGGAAGCTCAAATCCTAGGGTCTTCAGAAGAGACCCTGGCACTGACGCAAATACACGAGATAGGCTCTTTATCCTTTTCCCACTCCATTCTCTTACCCACTTTGTGGTCATCTAGCCACCAACTCCCACTTCAGTCAGTGGTCATGGGT…
Seq_464838	Sobic.002G424500	RFO1	Arabidopsis thaliana RFO1 (RESISTANCE TO FUSARIUM OXYSPORUM 1); kinase (RFO1) mRNA, complete cds.	Arabidopsis thaliana	CGCAGCACCAACCGTACCATGATACGACAGGAGCACTCCGGCGTTGTGTGTGTGTCCGCTCCGCGTTGTGCTCGTGTGGTTGCCTTGCCGTTGCCGGCCTCGCCCTCGCATGGCATGGCATGCCCTCGGAGTCGGGCCTTCCTTTCTTGCTCTGTCGCCGCAACGCTACCAAGTCGCTAACCTCTCCTCATCCTTCCTTCCTCGTAGTTTCCGACTCGTAACGCTCGTCTCTTGCAGACCTCCAAACCGCATGTCCTCCATATCTCTCTTCGGTCGCTCGTGTCCCTGCACGCGCTTCCTCTGACGAGTGACGACGACGGCGGCCGCTCGTTCGCCCTTCCCCGGCCGCAACCAAGCAGCAGGTCTTTGACAAGTAGCTAGCTGGTTTCAAGGCGCCTG…
Seq_464921	Sobic.002G188700	Serk3A	Nicotiana benthamiana SERK3A (Serk3A) mRNA, complete cds.	Nicotiana benthamiana	GCGGCGACAGCAGCAGCAGCGACGCGGTGCTCATCAACAGCTTAATGGCATTCATGGTGTACTGCCGTGTGGTGCTGTTCGATCAGATCGACGCGAATCCAAAAGTGGACGCGGCGGCACGGCCGCCGGCGAGGTGCCCGGACTGGCTCAGACCGGAGACGTTGCAGTGCCCGATCACTCTGGACCTGATGACGGACCCGGTGACGGTGTGTACTGGCCAGACGTACGACCGCGAGTCCATCACCCGGTGGATCAAGGCTGGATGCCGCACGTGCCCGGTCACAGGCGAGCGGCTCCGCACCGCCGACGTGGTGCCGAACGCCGCGCTCCGCGGGATCATCGAGCGGATGCTGCTCAGCAACGGCGTCTCGCTTCCGGACCGAAGCAGCTCGGGGCACC…
Seq_465026	Sobic.002G231300	Pid2	Oryza sativa Indica Group cultivar Digu B-lectin receptor kinase (Pid2) gene, complete cds.	Oryza sativa Indica Group	CGCCGCCGCCTAGGGTTCCGATCCCCTCCGCATGGATTCGCTGCCGCGGAAGCGCAAGGGCGGCGCGCGCGCCGCGTGCTCCCTGGCCGGATCCCGCCACGACGCGCCTGCCGCCCGCAAGCGCACCTGCCGCGAGCCCAAGCCGCGGCCCGAGAAGACGAAGCCCTCCTCCGCCGCCGCCGACGAGGGCTCCGCCTCCGCCCGGGGCGGCGGCGTGGTGATGACGGCGCCGCCCGCGAGCGGCTCGCGGGCGGCGCCCGACAGCCCCGGGCGCGGGCTCAAGCGCAAGCTGGGCTGCATCGACTCCGCCACGCGGATGGGGCGGAAGAAGCGGCTCGACAGCGAGTACGAGCTCGGCGCCGAGATCGGGCAGGGCAAGTTCGGCTCTGTCCGGATCTG…
Seq_465049	Sobic.002G417201	Pto	Lycopersicon pimpinellifolium Rio Grande-PtoR protein kinase mRNA, complete cds.	Solanum pimpinellifolium	CCCCAACCAGCCAGCCGCAAAGCTACCCAGCACGACCGTGATCACACCGGCCAGTGAGACGGTACGGTACAAGAAAAGTTTCCCCGTCGCGTCCGGCCATTACGACGGCGCCGGCCGAGCAGACGCCGCCGCCACGATGCCGCCCGCCACCGGCGCCGTCGCATCCGCCGCCGCCGACTCTCCCCCCGCCGCCGGGACCGTGCTCCTCGGCAGGTACGAGCTCGGCGGCCTCCTGGGCCGCGGCGCGTCCGCCAAGGTGTACCTGGCGCGGGACCTGCTCACGGGCCGGTCCGTGGCCATCAAGTCGTTCCCCAACCCGCGCGCCGGGGCCGCCGGTGACCGGCCCGTGGCCATCGAGCGTGAGGCGGGCATCCTCCGTCGCCTGCGGCACCGCCACGT…
Seq_465084	Sobic.001G452700	Pid2	Oryza sativa Indica Group cultivar Digu B-lectin receptor kinase (Pid2) gene, complete cds.	Oryza sativa Indica Group	GGACACAATCGAGAGGTCCCACGGACTGCCAAAAACAATTGAAATTTTTGAATGCCCGCACGGAAACGCGATGCCCTGATCCAATTCCAAGATGCACGCGTGATGCTTTATATAATTGCCTCGGACTGATTCTTGTATCTGAAATCTGAAACAACAAACGAAGGCCAACAATCCTTAGCTGAAGAAGTAGGTGCTGTAACTGCAAGCCACCATGCTCATCCTCGTTTTCCTGCTCTTGTCCAGCGTGGACCTCCGCCAAATAAGCGGAGCAACGACTGACACGCTCACCTTGGGCCAGTCTCTCCCATGGAACCAGACGCTGGTCTCCAAGGGCGGCAACTTCGAGCTCGGCCTCTTCTCCCCGGGCAACTCCAAGAAGCACTACATCGGCATCTGGTT…
Seq_465365	Sobic.002G152200	ER - Erecta	Arabidopsis thaliana ER (ERECTA) (ER) mRNA, complete cds.	Arabidopsis thaliana	GCCGCCGCCGCCGCCGCCTCCAGCTGCGCTTCGTCGTCAGAGGGTTCCCTTTCCTGCTCCCTCTGCCGCCGCCCCTCGCTGCGCCTCGTTGGCGGCGGCCTCACCGCCGGCTGGCGACGGGCACGACAAACCGAGGCCCCTCTTTCCACCACCCAAGTTCCCTTTCCTCTCTTTCTGCGGAAGGTGTCGGTGCTGCCCTCTGCTGGTACAGGTGTCTCAGATCCACCCGGCCGGACCTGGATCGATATCTCCGTTTGTTGGGCAACAAATTCTGGGGTTCAGCTAAACCCACAATCCGTGCCTAACGGCCAGTCTGGTGCTGCAAGGTTTCTCTAGGATTTTTGCGCAACAACAGCCATGTGGAGGCTCAAGCAGTTCATCCCCAAGGAGCAGCCCAGT…
Seq_465425	Sobic.008G186400	Xa26	Oryza sativa (japonica cultivar-group) bacterial blight resistance protein XA26 (Xa26) gene, complete cds.	Oryza sativa Japonica Group	CACACACACACACACACACACTGATACCGCCACGTTCCAACGCTTCACTGAAACGAACAGGGATGCTACGAAGTACTACTATCAGTACGATCAATTCCTGCAATTGCACTTCTAGATACTAAGAAGATCCTGTTGTGGCGGCGACTCATGTGGCCCTTGCTGCTGCTGCTCCCCCGGGCTCCCATCCTCCTTCGGCTCGATAACAAGGGGCACGTCTATGGACGTGGATGTCGAGCCGGGCATGTCGGCCAGTATCTGCACCACCTCCCGCATCGTGGGGCGCTCGACGCTCTGCTCCGCGACGCATAGCATGGCGACATAGAAGACATGGGTTAGTTCATACAGAGGCACCGTCGAGAGCCGGGGGTCGGCGATCTTCATCACGCCTTCCTTGCTCGA…
Seq_465507	Sobic.004G049500	RFO1	Arabidopsis thaliana RFO1 (RESISTANCE TO FUSARIUM OXYSPORUM 1); kinase (RFO1) mRNA, complete cds.	Arabidopsis thaliana	CCTCCCGATTTTGGGCGGAGAGGAGATGCTGCAACAGAAGCCGAACGAAAAAAGAAAAAGGACGGCTCCGCCCAAGGGTCGAAGGGAGGAGGAGTTGCCGCGTCGCCGCCCGCCGGTTCGATCCTTTGCGCGAGATCGAGCTTCCCCGGGGTTGGGGTTGGGGCTGGCGACATCTGGGATCCGTCGTCTCTCCTCGTGTTCTTGAGCAGTTCTCCACTTGTCTTGGCAGAGAACATTTGACTTAGTAGAGCAAATTGGGTAACTGGACACACAGGAAGCTTTGTGGTTTGTCCTAAGTGATCCTACCAAGTTCTCATAGGCTGCATACTGGTACAACATTTTCCCTGTGTTTTGGGTCACAGAAGAGGGGAAGTCAAGGATTTTCTATCTTGTAAGCCA…
Seq_465772	Sobic.002G013800	RPG1	Glycine max NB-LRR type disease resistance protein Rps1-k-1 (Rps1-k-1) and NB-LRR type disease resistance protein Rps1-k-2 (Rps1-k-2) genes, complete cds.	Glycine max	CCCAAGCCTCTCTGTTTTCCTCCTTACTAGCGTTTGCTTTCCGCACAATCGATATAGAGGCAAATCAGATGCTTGGAATCTCACAGGGATTGTAAGCCGGCAATCGAGCATATGCATGGAAGCTCACAGACAGGAAGTGTTGTAGCAGAACCTTTGAAGTAACATGTAGATCCCCACGATCGAGCCTGTGAGCATGCTGTCCTAGCAAGTCATGAATCAGATCTGCTACTCATCTCCAACACAGTTCGCACTTCGCAGTCAGCACTTGATTGACACCAAACACAGAAAAAGAGGTGAGGTGAGCATGCCTCGCTCCTGCTAGCGAGTGATACTATATCAAATCTCCAACAAAGTTCACAGGCAGCACTTGGTTGACATCATCAGGCACATAAAAAGAAC…
Seq_465774	Sobic.004G014600	RPG1	Glycine max NB-LRR type disease resistance protein Rps1-k-1 (Rps1-k-1) and NB-LRR type disease resistance protein Rps1-k-2 (Rps1-k-2) genes, complete cds.	Glycine max	AATGGTTACTTGTTTGTAGTAACCAGATTTGTCTTTCCATATAAACGATCGTCAAAGTCTGTTTTGGAATGTTCATAAGGTTGCCAGGTTGGTGATGGCGAAAGATAGGAAGGACAACAGAAACTGATTATATCCAGCAATAACAAGCACAGAAGACTGCAAAAATCCTCAGAGTCAAGTCAATATGATCATAAGCAGCATAAAAGCGGCTGTTGAGACCATAACTGGTTTCAACGAGTGTGTCACTTTTTTCCATTGGCTTAGATCTCTGCGACCCCGTTCAGGTGGTGCAGAAAATCAAGAACTTGAAGAAGATGATGTACTGAAGTTGCAGAGTTCTCTTCAATGTCTTCGGGATACTCTACCTGTGATGCGCAACTTAATTGATCGAGCAGAGTG…
Seq_465837	Sobic.009G011700	Pid2	Oryza sativa Indica Group cultivar Digu B-lectin receptor kinase (Pid2) gene, complete cds.	Oryza sativa Indica Group	GTTGAACTGTTTGGCTTCAACAAAATTTCTTAACACTCTGGACTGGATGTAATTATGTATTTACATACTGTACTTTACAAAGACTTGTAAATGTAAAAGCTACATGATAGACACAAAACATGCAGAACTCTGCCTCTTTACAAATCCCTCTAAGAACCTACTATAGTACCTACACCTACAAAGGGGGAAAAAATACTCTAGCGTATAATCCACTCACTCAAACTGGTTTTACAGAAGGAGCAGGCTTCCCCTTCACTGCCGCTTTGACACCATTGTTGTCCATGCTCCGACTGCTTGGCCTCTTCTGTAGGTGATGGTTACCTCCTTCCTTGGCGTCCTGGAGCTGTTCTAACGCTGTTACCACCTCGTCCATGCTGGGCCTGTGCCTGGACTCCACTG…
Seq_466030	Sobic.003G277900	ER - Erecta	Arabidopsis thaliana ER (ERECTA) (ER) mRNA, complete cds.	Arabidopsis thaliana	CCGGCACCAAAGAAAAATCACCATTTATATATGTACATACACAGCTCTTACTGAAGTGTGACGAGAAGAGATGAACAAAGCTTAAAAAGAAGGAAGAAAAGAAAATCAACCTACTCCCATAGGTACATAACATCTTCAACTGACCAAGCTATGAGGGAAAACTTCTGTCTTGTACCATCAGAAGGGAATGCTAACTCAAGAAGAGACTTCAAATGGTATCCTGACCAACTGATTCCTACGGGCATTTTGCCTCTGACCGGCCGTGTAGCTGCCACTACTAACCCCTGGGCAGTTTCTCGCATGTCGGTGGCCTTGCTAGTCCTTCTCCTCCTTGTCTTCTTTCAGGGTCGTCATCTCCACATCTCCAAAACATGCATCATCCATGGCGCCTGTGCATTC…
Seq_466040	Sobic.006G229100	Pid2	Oryza sativa Indica Group cultivar Digu B-lectin receptor kinase (Pid2) gene, complete cds.	Oryza sativa Indica Group	CATCACTAGTGGCCACAGCAATGACAAGACTTCTGTACCTTCCAGCCCTGACCTCCATGCTCCTTTGCCTCACAACATCCGCCGCCGCCACTGCATCTGACACGCTCAACAACGGTGGCAACGTCACCGATGGTGCAACGCTGGTCTCATCCGGCAGCACCTTTACCCTGGGCTTCTTCTCCCCGGCCGGCGTGCCAGCCAAGAGATACCTTGGCATCTGGTTCACCGCGTCCCCGGATGCCGTCTGCTGGGTGGCCAACCGCGACACCCCCCTCAACAACACCTCGGGCGTACTGGTGGTCGGCAGCACCGGGAGCCTTCGCCTTCTCGATGGCTCTGGCCACACCACGTGGTCTTCCAACACGACGACGAGTAGTTCCGCCCCAGCCGTGGCGCAGT…
Seq_466131	Sobic.008G101100	Pm3	Triticum aestivum powdery mildew resistance protein PM3b (Pm3) gene, Pm3-b allele, complete cds.	Triticum aestivum	GAATTTCCAAAGTCTTGATGGAAGGAGGAAGATCGAGAACCTCTGACAAGCCATCGCAGCAGGATATGCGCAGATATTCTAGACAAGGAAGGAAGTGATGTTTGGTTGATGATGAGAGCATAGGAACTGGTGTGGATGCCGTGGCGTCGCTGCAGGAGCAAGACCCTGCAATTAATGCTGATTTGCCGTCCTCGTCGTGTGCTGCAGCGACTCCCTGCGCACTCTCCAACATCGCACTAGTAGTATCCAGCTGCTTACTGAATGCGATGGCCTCGAGCTTAGGACAGCTGACAATATTTAATGACTTGAGAGATGCCGGTAGGACACTGGTGGGGACCTCTACCAAACATGCACAAGCTTGTATATCCAGAGACTCCAGGCGTGGCAGTAGTACACTGC…
Seq_46639	Sobic.003G229400	RPG1	Hordeum vulgare subsp. vulgare RPG1 (Rpg1) gene, Rpg1-Swiss Hv 489 allele, complete cds.	Hordeum vulgare	GCTAGTTCAAGATCGATCTGCAAACATTCATACCAAGCAAATTTTTGCTATATCTTTGTATCTTTCTGAAGTGATTCTGATGTAGCACATTGATATTTGAGAAACATCTCTATACAATATTTAAAACGTTAATGTTCCTTCCTTTCCCTTCTGCCTCCTCGCTCTAGAAAAGAAATTGGCGCCTAAATTACCCAGATTACAAGCCGCTGGACTACCCCTTCAGTGTGCCACCAAGGGCACTTCTCAGGCACAGGCAGATACAAGCTGGTGCCCTAAATAGAACAAACATTTTGACACGCTTCATGCCGGCGACAGTGGTTCCTGTTTTCCTGACCACACAGGAACCCTGTACTGCTCTGCACTCTAAACTTGGCAGCATCCAGCCAAAGGTTTGATTGG…
Seq_466412	Sobic.001G223550	LeEIX10	Lycopersicon esculentum EIX receptor 2 (Eix2) gene, complete cds.	Solanum lycopersicum	ATCAGAAAGGCATACAAAGAAATACAGCAAATCTCCTTAAACAGATTATGTTTTTACTGAAATTGCTATATAACAGTTGATTATAATCCTTCTGGCCTTCCTCTCAACATTACATCTTAAAGCATACAAAGAAAGGCAGCAAATCTCCTGCCGTACTTGGGGAGAAAAAAAAGAGAAGATTGGATTGCTAAGTATAGTAGAGAAGACATCATGACTCTTACTCCATTTTTCAGCTTGTATCACTTGTGGAAAACATAGGTACGGAAGATGGATCACTCTTTTCTTTCGAAAGAAAATGATTGATAGGCCGCACCTTTTGCATAATTTTGTATTGTATGCGATCAACAAACAAGAAAACAGAATACCTCAACTTCGCAATGGAAAAGAGCATCCCATACC…
Seq_466472	Sobic.001G329100	Serk3A	Nicotiana benthamiana SERK3A (Serk3A) mRNA, complete cds.	Nicotiana benthamiana	CCACACACCTTCCTGCCCTTTTCCACTCCTCCCCACCACCTCAAAGTTGAACCAGCAGCTCCCATCCCATCCCATTCTTCCTCCGCCGCTTGCGAGCTGCCCCTGCCCCCATTTCCTTCCCTTTCCTTTCACACCGGAGGAGAGCAGAGCGCAGAAGCAGCAAGCAAGCAGAGCCGGTCAGCAGACCAGCCCTCCCCGTCCCAGTCTCCGATGGCGGCTCGCGTCCTCGCCCAAGTCCTCCTCGTCGCCGCCCTCGCCCTCGCCGCGCCCGCGCGGGCGTCCAACGACGAGGGCGACGCGCTCTACGCGCTGCGGCAGCGGCTGTCCGACCCCAACGGCGTGCTGCAGAGCTGGGATCCCACGCTCGTCAACCCCTGCACCTGGTTCCACGTCACCTGC…
Seq_466475	Sobic.003G133700	Serk3A	Nicotiana benthamiana SERK3A (Serk3A) mRNA, complete cds.	Nicotiana benthamiana	TTTTTTTTGATTGAAATTGCATCGTTTCAAATAGCAAAAAGCTACAAACAACAACGGGCACGTTTTAGCCAAGCATTGGTTATGAAATGACTGATCCTAGATTCTAAAATCTTTGCAAATCCAAAAAACAGAAAGAGGCAACAAATCTCTGTTCTCTAGCTACGAGCAGGCACAGGCACCTTAGCCTGAACAACAGCAACACCACGAACATGACGAAGTACACAGCAGCAAATGGAACCCTAAAAATATGGAAAGCGATCCAGAAACAGCATCTTCTCCGCAGCATCCTTTCTGTAGTAGACTAGATCGAAGGGGAAGTCAATACCCGAACCATCCCCCCTTGCATAGTGGTGACGCCTTCTTTTTCCTAACGAACTGAATTTTCGCTTGCAGTATGAG…
Seq_466641	Sobic.001G346100	Serk3A	Nicotiana benthamiana SERK3A (Serk3A) mRNA, complete cds.	Nicotiana benthamiana	AAAACACACACTGTCACACTGACAAACAAACAGGGGAGAGCGGACAGAGGAAGGGAGAAAAGGGCAGTGAACAGAGGCAGATAAATTTTATTTCCTTTTCCCCCCTTCACCTTCTTCCTTTCCTTGGATACTCATACTCCAGGGGAGAATGTCTCCATGCTTAAAAGCGAGAGCCAGTGAGTGCGGAGCAGCTCCAGGCATGGCGTTGGGCGTGGCCGGAGTGGCGGCGCTACTCTTGCTCTCCGTCTTCACCGGGGCCACCGCCGACACCAACTCCGACGACGTGACTGCCCTCAACAAATTCTACACAACCATGAACTCGCCGTCGCAGCTGACAAACTGGGTACCACAGAACGGCGACCCATGTGGCCAGTCTTGGCTCGGGGTTACTTGTTCCGG…
Seq_466754	Sobic.004G042200	ER - Erecta	Arabidopsis thaliana ER (ERECTA) (ER) mRNA, complete cds.	Arabidopsis thaliana	CGGTATTCATCCTTTGATAATCAGATTAAAAAGAAAATGTTATAGGTATCACTGTCACCTGACGTAAGCACAAAGCGATATGAAAGCAAAATTAAATACAACAGGTGTTTGTGTTGCTTCTCCAGAAAGCAGCAATTGAGTAAGCACAAGTGGCGCAAAAGCATAACTAAATACAACAGTGTTACAGCTTCTCCAGAAAGCAGCAGTTGATGGATCAAAAATCAGAAGACCACAGCATCACTTGTCACCGACGGCGGTGCCACCAGAGCGCGGGCTCCAGCTACACAATGCCAGTCCCCTTGGAAACATGATAACAACTGAGATTAGCTTATGGATGCCAGCTATTTCATCATTGTAGACAATACAAACAACAACAGCAGAGGTAACTTATTCCTACTT…
[truncated: 874 more rows]
